# Supplementary material for: Engineered yeast cells simulating CD19+ cancers to control CAR T cell activation
Source: Research Square preprint supplement (doi:10.21203/rs.3.rs-3624405/v1), 2023-11-30
Supplement: Supplementary file 1 [file 5b747f1f1bff733494fb7c4a.xlsx]

## Sheet: Suppl. Table 1 - mRNA levels
	Selected genes of S. cerevisiae transcriptome during pheromone response pathway (PRP) activation data acquired from: Jensen, E. D., Deichmann, M., Ma, X., Vilandt, R. U., Schiesaro, G., Rojek, M. B., … Jensen, M. K. (2022). Engineered cell differentiation and sexual reproduction in probiotic and mating yeasts. Nature Communications, 13(1), 6201. https://doi.org/10.1038/s41467-022-33961-y
	Suppl. Fig. 1A-B																					Overall tendency upon GPCR stimulation (fold)
	RPKM TMM-normalized RPKM (Reads Per Kilobase of transcript, per Million mapped reads)
																						Suppl. Fig. 1C
				Raw values				Fold changes				Absolute changes					Fold difference between highest and lowest detectable mRNA level within strain at basal level.						µ fold change RPKM				SD
	Strain	Ligand	Gene	0 µM	1 µM	10 µM	100 µM	0 µM	1 µM	10 µM	100 µM	0 µM	1 µM	10 µM	100 µM							Gene	0 µM	1 µM	10 µM	100 µM	0 µM	1 µM	10 µM	100 µM
	Wildtype Ste2	α-factor	HPF1	511.407	220.067	1.89743	1.84056	1	0.430316	0.00371021	0.00359902	0	-291.34	-509.509	-509.566		YCL076W	3.1225e-17				HPF1	1	0.482041	0.266846	0.150924	0	0.360304	0.280903	0.16546
			AGA2	135.028	321.378	3466.93	2451.85	1	2.38009	25.6756	18.1581	0	186.35	3331.9	2316.82		IME4	0.166584	101877			AGA2	1	3.99998	14.5816	22.6282	0	5.00801	11.4657	12.7332
			FUS1	12.4484	30.077	803.105	834.059	1	2.41613	64.5146	67.0012	0	17.6286	790.656	821.61		FIG1	1.52244				FUS1	1	9.61184	36.7772	76.951	0	14.4027	29.8501	43.0116
			IME4	0.166584	0.101529	80.4031	144.01	1	0.609474	482.658	864.485	0	-0.0650554	80.2365	143.843		FUS1	12.4484				IME4	1	14.3179	123.048	395.406	0	20.3789	202.514	448.632
			MFA2	3090.6	3627.54	13154.5	12291	1	1.17374	4.25628	3.97691	0	536.945	10063.9	9200.41		AGA2	135.028				MFA2	1	2.43418	4.58188	7.21491	0	1.90436	2.65914	4.41153
			FIG1	1.52244	3.27086	1795.05	2623.99	1	2.14843	1179.06	1723.54	0	1.74841	1793.52	2622.47		YIL169C	160.693				FIG1	1	16.496	318.909	782.636	0	26.5103	491.747	882.218
			YCL076W	3.1225e-17	3.1225e-17	43.6718	56.6262	1	1	1.39862e+18	1.81349e+18	0	0	43.6718	56.6262		HPF1	511.407				YCL076W	1	17.6279	2.79723e+17	4.05524e+17	0	23.6385	6.25481e+17	7.92518e+17
			CSS1	160.693	107.862	0.371112	0.724811	1	0.671232	0.00230945	0.00451054	0	-52.8307	-160.322	-159.968		MFA1	904.863				CSS1	1	0.497263	0.33162	0.175955	0	0.319915	0.363531	0.183726
			MFA1	904.863	1177.86	9332.61	5830.19	1	1.3017	10.3138	6.44318	0	272.998	8427.75	4925.33		MFA2	3090.6				MFA1	1	4.40002	12.3618	17.4828	0	6.18661	10.9238	12.5458
			PGK1	6277.02	6016.64	6832.15	3674.99	1	0.958519	1.08844	0.585467	0	-260.375	555.137	-2602.03		PGK1	6277.02				PGK1	1	0.949276	1.01104	0.859201	0	0.0605074	0.0846235	0.16926
			TDH3	16971.1	16641.1	15206.1	10794.4	1	0.980555	0.895999	0.636044	0	-330.005	-1765.02	-6176.74		TDH3	16971.1				TDH3	1	0.979216	0.966339	0.876064	0	0.0383237	0.061062	0.154423
	sst2Δ, Ste2	α-factor	HPF1	143.556	1.64023	1.75359	1.35688	1	0.0114257	0.0122154	0.00945192	0	-141.916	-141.802	-142.199		YCL076W	1.46832	6880.65
			AGA2	1309.2	2995.13	2810.1	2967.77	1	2.28776	2.14643	2.26686	0	1685.93	1500.9	1658.58		IME4	3.83264
			FUS1	131.597	892.661	880.029	804.226	1	6.78327	6.68728	6.11126	0	761.064	748.431	672.629		YIL169C	59.6755
			IME4	3.83264	184.629	188.185	180.378	1	48.1729	49.1007	47.0636	0	180.797	184.353	176.545		FUS1	131.597
			MFA2	6425.06	14797.9	14262.8	15937.5	1	2.30316	2.21987	2.48052	0	8372.88	7837.75	9512.42		HPF1	143.556
			FIG1	168.027	2149.13	2103.14	2209.99	1	12.7904	12.5167	13.1526	0	1981.1	1935.12	2041.96		FIG1	168.027
			YCL076W	1.46832	75.3639	83.5622	64.9887	1	51.3266	56.91	44.2606	0	73.8956	82.0938	63.5204		AGA2	1309.2
			CSS1	59.6755	0.498122	0.705336	0.254028	1	0.00834718	0.0118195	0.00425683	0	-59.1773	-58.9701	-59.4214		MFA1	3802.76
			MFA1	3802.76	6359.53	6264.1	7886.05	1	1.67235	1.64725	2.07377	0	2556.77	2461.34	4083.29		PGK1	3867.71
			PGK1	3867.71	3293.88	3478.69	3524.28	1	0.851637	0.899421	0.911206	0	-573.825	-389.011	-343.431		MFA2	6425.06
			TDH3	10103	9666.29	9913.71	10164.7	1	0.956774	0.981264	1.0061	0	-436.708	-189.293	61.6748		TDH3	10103
	MTNR1A (MT1)	melatonin	HPF1	878.627	253.702	169.794	113.26	1	0.288748	0.193249	0.128906	0	-624.925	-708.833	-765.367		YCL076W	0.0416676	259013
			AGA2	59.267	764.305	1290.57	1714.2	1	12.896	21.7755	28.9233	0	705.038	1231.3	1654.93		IME4	0.103143
			FUS1	2.26177	79.388	148.935	217.288	1	35.1	65.8491	96.07	0	77.1263	146.674	215.026		FIG1	1.44545
			IME4	0.103143	1.93819	6.59866	10.4271	1	18.7912	63.9756	101.093	0	1.83505	6.49552	10.324		FUS1	2.26177
			MFA2	716.346	4104.4	5913.63	7352.3	1	5.72963	8.25528	10.2636	0	3388.05	5197.29	6635.95		AGA2	59.267
			FIG1	1.44545	91.344	213.461	335.522	1	63.1942	147.678	232.123	0	89.8985	212.015	334.076		MFA1	160.326
			YCL076W	0.0416676	1.41402	5.148	6.39532	1	33.9358	123.549	153.484	0	1.37236	5.10633	6.35366		YIL169C	367.024
			CSS1	367.024	127.972	92.7076	67.4302	1	0.348674	0.252593	0.183722	0	-239.052	-274.316	-299.594		MFA2	716.346
			MFA1	160.326	2471.97	3571.02	4337.96	1	15.4184	22.2734	27.057	0	2311.64	3410.69	4177.63		HPF1	878.627
			PGK1	3388.12	3278.09	3259.96	2807.12	1	0.967523	0.962171	0.828518	0	-110.037	-128.168	-581.002		PGK1	3388.12
			TDH3	10792.4	10186.6	9835.86	8742.9	1	0.943862	0.911366	0.810096	0	-605.869	-956.574	-2049.53		TDH3	10792.4
	5HT4b	serotonin	HPF1	24.3814	19.7671	13.0992	9.84524	1	0.810748	0.537263	0.403802	0	-4.61423	-11.2822	-14.5361		YCL076W	0.0669294	138157
			AGA2	73.7853	109.96	1558.53	2436.71	1	1.49026	21.1225	33.0244	0	36.1742	1484.75	2362.93		IME4	0.0827345
			FUS1	5.71268	14.2614	239.672	631.676	1	2.49644	41.9543	110.574	0	8.54869	233.959	625.963		FIG1	0.95085
			IME4	0.0827345	0.0484696	1.39147	75.0937	1	0.585846	16.8185	907.647	0	-0.0342648	1.30874	75.0109		YIL169C	4.71045
			MFA2	704.385	1281.76	4342.5	9232.27	1	1.81969	6.16495	13.1069	0	577.379	3638.11	8527.89		FUS1	5.71268
			FIG1	0.95085	2.59584	239.851	1679.39	1	2.73002	252.249	1766.19	0	1.64499	238.9	1678.43		HPF1	24.3814
			YCL076W	0.0669294	0.0586961	10.6287	59.1467	1	0.876985	158.805	883.717	0	-0.00823336	10.5618	59.0797		AGA2	73.7853
			CSS1	4.71045	3.09166	3.99574	2.08798	1	0.656342	0.848273	0.443265	0	-1.61878	-0.714703	-2.62247		MFA1	141.275
			MFA1	141.275	363.002	3546.19	4263.24	1	2.56948	25.1014	30.1769	0	221.728	3404.92	4121.96		MFA2	704.385
			PGK1	2636.79	2507.44	2898.49	2718.63	1	0.950943	1.09925	1.03104	0	-129.352	261.699	81.8362		PGK1	2636.79
			TDH3	9246.8	8987.03	9281.88	9124.74	1	0.971907	1.00379	0.986799	0	-259.772	35.0791	-122.066		TDH3	9246.8
	ADORA2B (A2bR)	adenosine	HPF1	289.686	251.728	170.276	60.5035	1	0.868968	0.587794	0.208859	0	-37.9582	-119.41	-229.182		YCL076W	3.1225e-17
			AGA2	44.82	42.3931	98.0576	1379.05	1	0.945853	2.18781	30.7686	0	-2.42689	53.2376	1334.23		IME4	0.0251833	527429
			FUS1	2.30757	2.91537	11.263	242.291	1	1.26339	4.88087	104.998	0	0.607799	8.9554	239.983		FIG1	0.606199
			IME4	0.0251833	0.0863826	0.067687	1.42897	1	3.43015	2.68777	56.7426	0	0.0611993	0.0425037	1.40378		FUS1	2.30757
			MFA2	861.848	986.54	1734.91	5383.65	1	1.14468	2.01302	6.24663	0	124.692	873.067	4521.8		AGA2	44.82
			FIG1	0.606199	0.98032	1.84814	108.008	1	1.61716	3.04873	178.172	0	0.374121	1.24194	107.402		MFA1	118.566
			YCL076W	3.1225e-17	3.1225e-17	3.1225e-17	6.68633	1	1	1	2.14134e+17	0	0	0	6.68633		YIL169C	252.035
			CSS1	252.035	202.061	136.882	61.5017	1	0.801719	0.543106	0.244021	0	-49.9736	-115.153	-190.533		HPF1	289.686
			MFA1	118.566	123.098	293.215	2568.52	1	1.03822	2.47301	21.6631	0	4.53174	174.649	2449.95		MFA2	861.848
			PGK1	5323.21	5417.75	5354.81	5002.62	1	1.01776	1.00594	0.939776	0	94.5399	31.6068	-320.585		PGK1	5323.21
			TDH3	13282.4	13853.3	13804	12502.4	1	1.04298	1.03927	0.941274	0	570.897	521.602	-780.02		TDH3	13282.4

## Sheet: Suppl. Table 2 - Promoter ANOVA
	Two-way ANOVA: Log10(yEGFP)										One-way ANOVA: Maximum ΔGFP (GFPx µM - GFP0 µM)										Two-way ANOVA: Log10(fold change(yEGFP))										Two-way ANOVA: Log10(SSC-A)										Two-way ANOVA: Log10(yEGFP/SSC-A)
	Data shown in: Fig. 2B										Data shown in: Suppl. Fig. 2										Data shown in: Fig. 2B										Data shown in: Fig. 2C										Data shown in: Fig. 2B-C
	Analysis description: comparison of absolute yEGFP levels for promoter library.										Analysis description: comparison of the maximal absolute changes in yEGFP levels for each promoter in the promoter library.										Analysis description: comparison of fold changes of absolute yEGFP levels for promoter library.										Analysis description: comparison of shmoo intensities for promoter library.										Analysis description: comparison of SSC-normalized absolute yEGFP levels for promoter library.
	Table Analyzed	Log(yEGFP)									Table Analyzed	ΔGFP = GFPx µM - GFP0 µM									Table Analyzed	Log(fold change: yEGFP)									Table Analyzed	Log(SSC-A)									Table Analyzed	Log(yEGFP/SSC-A)
											Data sets analyzed	A-L
	Two-way ANOVA	Ordinary																			Two-way ANOVA	Ordinary									Two-way ANOVA	Ordinary									Two-way ANOVA	Ordinary
	Alpha	0.05									ANOVA summary										Alpha	0.05									Alpha	0.05									Alpha	0.05
											F	245.9
	Source of Variation	% of total variation	P value	P value summary	Significant?						P value	<0,0001									Source of Variation	% of total variation	P value	P value summary	Significant?						Source of Variation	% of total variation	P value	P value summary	Significant?						Source of Variation	% of total variation	P value	P value summary	Significant?
	Ligand concentration	29.09	<0,0001	****	Yes						P value summary	****									Ligand concentration	45.59	<0,0001	****	Yes						Ligand concentration	84.39	<0,0001	****	Yes						Ligand concentration	13.39	<0,0001	****	Yes
	Strain	59.73	<0,0001	****	Yes						Significant diff. among means (P < 0.05)?	Yes									Strain	35.83	<0,0001	****	Yes						Strain	3.912	<0,0001	****	Yes						Strain	75.17	<0,0001	****	Yes
											R squared	0.9912
	ANOVA table	SS (Type III)	DF	MS	F (DFn, DFd)	P value															ANOVA table	SS (Type III)	DF	MS	F (DFn, DFd)	P value					ANOVA table	SS (Type III)	DF	MS	F (DFn, DFd)	P value					ANOVA table	SS (Type III)	DF	MS	F (DFn, DFd)	P value
	Ligand concentration	91.87	7	13.12	F (7, 224) = 83,29	P<0,0001					ANOVA table	SS	DF	MS	F (DFn, DFd)	P value					Ligand concentration	91.87	7	13.12	F (7, 224) = 83,29	P<0,0001					Ligand concentration	14.13	7	2.018	F (7, 224) = 224,5	P<0,0001					Ligand concentration	34.71	7	4.958	F (7, 224) = 37,32	P<0,0001
	Strain	188.6	11	17.15	F (11, 224) = 108,8	P<0,0001					Treatment (between columns)	40.44	11	3.676	F (11, 24) = 245,9	P<0,0001					Strain	72.21	11	6.564	F (11, 224) = 41,66	P<0,0001					Strain	0.655	11	0.05955	F (11, 224) = 6,624	P<0,0001					Strain	194.8	11	17.71	F (11, 224) = 133,3	P<0,0001
	Residual	35.29	224	0.1576							Residual (within columns)	0.3588	24	0.01495							Residual	35.29	224	0.1576							Residual	2.014	224	0.008989							Residual	29.76	224	0.1329
											Total	40.8	35
	Data summary																				Data summary										Data summary										Data summary
	Number of columns (Strain)	12									Data summary										Number of columns (Strain)	12									Number of columns (Strain)	12									Number of columns (Strain)	12
	Number of rows (Ligand concentration)	8									Number of treatments (columns)	12									Number of rows (Ligand concentration)	8									Number of rows (Ligand concentration)	8									Number of rows (Ligand concentration)	8
	Number of values	243									Number of values (total)	36									Number of values	243									Number of values	243									Number of values	243
	Compare cell means regardless of rows and columns										Number of families	1									Compare cell means regardless of rows and columns										Compare cell means regardless of rows and columns										Compare cell means regardless of rows and columns
											Number of comparisons per family	66
	Number of families	1									Alpha	0.05									Number of families	1									Number of families	1									Number of families	1
	Number of comparisons per family	3240																			Number of comparisons per family	3240									Number of comparisons per family	3240									Number of comparisons per family	3240
	Alpha	0.05									Tukey's multiple comparisons test	Mean Diff,	95,00% CI of diff,	Below threshold?	Summary	Adjusted P Value					Alpha	0.05									Alpha	0.05									Alpha	0.05
											DIX14 (Neg.Con.) vs. DIX27 (PPGK1)	-2.34	-2,700 to -1,980	Yes	****	<0,0001	A-B
	Tukey's multiple comparisons test	Predicted (LS) mean diff,	95,00% CI of diff,	Below threshold?	Summary	Adjusted P Value					DIX14 (Neg.Con.) vs. DIX28 (PTDH3)	-3.275	-3,635 to -2,915	Yes	****	<0,0001	A-C				Tukey's multiple comparisons test	Predicted (LS) mean diff,	95,00% CI of diff,	Below threshold?	Summary	Adjusted P Value					Tukey's multiple comparisons test	Predicted (LS) mean diff,	95,00% CI of diff,	Below threshold?	Summary	Adjusted P Value					Tukey's multiple comparisons test	Predicted (LS) mean diff,	95,00% CI of diff,	Below threshold?	Summary	Adjusted P Value
											DIX14 (Neg.Con.) vs. DIX17 (PMFA2)	-3.651	-4,011 to -3,291	Yes	****	<0,0001	A-D
	0:Neg.Con. vs. 0:PPGK1	-2.327	-3,142 to -1,512	Yes	****	<0,0001					DIX14 (Neg.Con.) vs. DIX18 (PMFA1)	-2.436	-2,796 to -2,076	Yes	****	<0,0001	A-E				0:DIX14 (Neg.Con.) vs. 0:DIX27 (PPGK1)	0.006889	-0,8083 to 0,8221	No	ns	>0,9999					0:Neg.Con. vs. 0:PPGK1	0.02893	-0,1658 to 0,2236	No	ns	>0,9999					0:DIX14 (Neg.Con.) vs. 0:DIX27 (PPGK1)	-2.356	-3,105 to -1,608	Yes	****	<0,0001
	0:Neg.Con. vs. 0:PTDH3	-3.272	-4,087 to -2,456	Yes	****	<0,0001					DIX14 (Neg.Con.) vs. DIX19 (PAGA2)	-2.716	-3,076 to -2,356	Yes	****	<0,0001	A-F				0:DIX14 (Neg.Con.) vs. 0:DIX28 (PTDH3)	-0.01795	-0,8331 to 0,7972	No	ns	>0,9999					0:Neg.Con. vs. 0:PTDH3	3.781e-05	-0,1947 to 0,1947	No	ns	>0,9999					0:DIX14 (Neg.Con.) vs. 0:DIX28 (PTDH3)	-3.272	-4,020 to -2,523	Yes	****	<0,0001
	0:Neg.Con. vs. 0:PCSS1	-0.583	-1,276 to 0,1097	No	ns	0.3614					DIX14 (Neg.Con.) vs. DIX20 (PYCL076W)	-2.237	-2,597 to -1,877	Yes	****	<0,0001	A-G				0:DIX14 (Neg.Con.) vs. 0:DIX17 (PMFA2)	-0.6182	-1,311 to 0,07455	No	ns	0.2123					0:Neg.Con. vs. 0:PCSS1	-0.08429	-0,2498 to 0,08118	No	ns	0.9999					0:DIX14 (Neg.Con.) vs. 0:DIX17 (PMFA2)	-3.373	-4,009 to -2,737	Yes	****	<0,0001
	0:Neg.Con. vs. 0:PIME4	-0.7973	-1,490 to -0,1045	Yes	**	0.0038					DIX14 (Neg.Con.) vs. DIX21 (PIME4)	-1.357	-1,717 to -0,9974	Yes	****	<0,0001	A-H				0:DIX14 (Neg.Con.) vs. 0:DIX18 (PMFA1)	-0.6329	-1,326 to 0,05985	No	ns	0.1649					0:Neg.Con. vs. 0:PIME4	-0.1167	-0,2822 to 0,04875	No	ns	0.8466					0:DIX14 (Neg.Con.) vs. 0:DIX18 (PMFA1)	-1.987	-2,623 to -1,351	Yes	****	<0,0001
	0:Neg.Con. vs. 0:PHPF1	-1.264	-1,957 to -0,5714	Yes	****	<0,0001					DIX14 (Neg.Con.) vs. DIX22 (PHPF1)	-1.196	-1,556 to -0,8356	Yes	****	<0,0001	A-I				0:DIX14 (Neg.Con.) vs. 0:DIX19 (PAGA2)	-0.9301	-1,623 to -0,2374	Yes	****	<0,0001					0:Neg.Con. vs. 0:PHPF1	0.005449	-0,1600 to 0,1709	No	ns	>0,9999					0:DIX14 (Neg.Con.) vs. 0:DIX19 (PAGA2)	-2.015	-2,651 to -1,379	Yes	****	<0,0001
	0:Neg.Con. vs. 0:PYCL076W	-1.444	-2,137 to -0,7510	Yes	****	<0,0001					DIX14 (Neg.Con.) vs. DIX23 (PCSS1)	-0.6393	-0,9993 to -0,2793	Yes	****	<0,0001	A-J				0:DIX14 (Neg.Con.) vs. 0:DIX20 (PYCL076W)	-1.184	-1,876 to -0,4909	Yes	****	<0,0001					0:Neg.Con. vs. 0:PYCL076W	-0.08493	-0,2504 to 0,08053	No	ns	0.9999					0:DIX14 (Neg.Con.) vs. 0:DIX20 (PYCL076W)	-1.359	-1,995 to -0,7227	Yes	****	<0,0001
	0:Neg.Con. vs. 0:PMFA1	-2.009	-2,702 to -1,317	Yes	****	<0,0001					DIX14 (Neg.Con.) vs. DIX24 (PFUS1)	-3.043	-3,403 to -2,683	Yes	****	<0,0001	A-K				0:DIX14 (Neg.Con.) vs. 0:DIX21 (PIME4)	-0.5544	-1,247 to 0,1384	No	ns	0.5127					0:Neg.Con. vs. 0:PMFA1	-0.02251	-0,1880 to 0,1430	No	ns	>0,9999					0:DIX14 (Neg.Con.) vs. 0:DIX21 (PIME4)	-0.6806	-1,317 to -0,04445	Yes	*	0.0162
	0:Neg.Con. vs. 0:PFIG1	-1.722	-2,415 to -1,029	Yes	****	<0,0001					DIX14 (Neg.Con.) vs. DIX25 (PFIG1)	-2.678	-3,038 to -2,318	Yes	****	<0,0001	A-L				0:DIX14 (Neg.Con.) vs. 0:DIX22 (PHPF1)	0.1841	-0,5086 to 0,8769	No	ns	>0,9999					0:Neg.Con. vs. 0:PFIG1	-0.1278	-0,2933 to 0,03765	No	ns	0.6203					0:DIX14 (Neg.Con.) vs. 0:DIX22 (PHPF1)	-1.27	-1,906 to -0,6334	Yes	****	<0,0001
	0:Neg.Con. vs. 0:PAGA2	-2.068	-2,761 to -1,375	Yes	****	<0,0001					DIX27 (PPGK1) vs. DIX28 (PTDH3)	-0.9341	-1,294 to -0,5742	Yes	****	<0,0001	B-C				0:DIX14 (Neg.Con.) vs. 0:DIX23 (PCSS1)	0.03516	-0,6576 to 0,7279	No	ns	>0,9999					0:Neg.Con. vs. 0:PAGA2	-0.05279	-0,2183 to 0,1127	No	ns	>0,9999					0:DIX14 (Neg.Con.) vs. 0:DIX23 (PCSS1)	-0.4987	-1,135 to 0,1374	No	ns	0.5756
	0:Neg.Con. vs. 0:PFUS1	-2.263	-2,956 to -1,571	Yes	****	<0,0001					DIX27 (PPGK1) vs. DIX17 (PMFA2)	-1.311	-1,671 to -0,9507	Yes	****	<0,0001	B-D				0:DIX14 (Neg.Con.) vs. 0:DIX24 (PFUS1)	-1.422	-2,115 to -0,7291	Yes	****	<0,0001					0:Neg.Con. vs. 0:PFUS1	-0.1379	-0,3033 to 0,02761	No	ns	0.3908					0:DIX14 (Neg.Con.) vs. 0:DIX24 (PFUS1)	-2.126	-2,762 to -1,489	Yes	****	<0,0001
	0:Neg.Con. vs. 0:PMFA2	-3.39	-4,083 to -2,697	Yes	****	<0,0001					DIX27 (PPGK1) vs. DIX18 (PMFA1)	-0.09559	-0,4556 to 0,2644	No	ns	0.9974	B-E				0:DIX14 (Neg.Con.) vs. 0:DIX25 (PFIG1)	-1.346	-2,039 to -0,6536	Yes	****	<0,0001					0:Neg.Con. vs. 0:PMFA2	-0.01701	-0,1825 to 0,1485	No	ns	>0,9999					0:DIX14 (Neg.Con.) vs. 0:DIX25 (PFIG1)	-1.594	-2,230 to -0,9579	Yes	****	<0,0001
	0:Neg.Con. vs. 10-4:PCSS1	-0.5006	-1,281 to 0,2799	No	ns	0.9631					DIX27 (PPGK1) vs. DIX19 (PAGA2)	-0.3757	-0,7356 to -0,01571	Yes	*	0.0355	B-F				0:DIX14 (Neg.Con.) vs. 0.0001:DIX17 (PMFA2)	-0.5358	-1,316 to 0,2447	No	ns	0.8923					0:Neg.Con. vs. 10-4:PCSS1	-0.05994	-0,2464 to 0,1265	No	ns	>0,9999					0:DIX14 (Neg.Con.) vs. 0.0001:DIX17 (PMFA2)	-3.315	-4,031 to -2,598	Yes	****	<0,0001
	0:Neg.Con. vs. 10-4:PIME4	-0.7149	-1,495 to 0,06559	No	ns	0.1601					DIX27 (PPGK1) vs. DIX20 (PYCL076W)	0.1035	-0,2565 to 0,4635	No	ns	0.9949	B-G				0:DIX14 (Neg.Con.) vs. 0.0001:DIX18 (PMFA1)	-0.5505	-1,331 to 0,2300	No	ns	0.8468					0:Neg.Con. vs. 10-4:PIME4	-0.09237	-0,2788 to 0,09405	No	ns	>0,9999					0:DIX14 (Neg.Con.) vs. 0.0001:DIX18 (PMFA1)	-1.929	-2,646 to -1,212	Yes	****	<0,0001
	0:Neg.Con. vs. 10-4:PHPF1	-1.182	-1,962 to -0,4012	Yes	****	<0,0001					DIX27 (PPGK1) vs. DIX21 (PIME4)	0.9831	0,6231 to 1,343	Yes	****	<0,0001	B-H				0:DIX14 (Neg.Con.) vs. 0.0001:DIX19 (PAGA2)	-0.8477	-1,628 to -0,06724	Yes	*	0.0122					0:Neg.Con. vs. 10-4:PHPF1	0.0298	-0,1566 to 0,2162	No	ns	>0,9999					0:DIX14 (Neg.Con.) vs. 0.0001:DIX19 (PAGA2)	-1.957	-2,674 to -1,240	Yes	****	<0,0001
	0:Neg.Con. vs. 10-4:PYCL076W	-1.361	-2,142 to -0,5809	Yes	****	<0,0001					DIX27 (PPGK1) vs. DIX22 (PHPF1)	1.145	0,7849 to 1,505	Yes	****	<0,0001	B-I				0:DIX14 (Neg.Con.) vs. 0.0001:DIX20 (PYCL076W)	-1.101	-1,882 to -0,3208	Yes	****	<0,0001					0:Neg.Con. vs. 10-4:PYCL076W	-0.06058	-0,2470 to 0,1258	No	ns	>0,9999					0:DIX14 (Neg.Con.) vs. 0.0001:DIX20 (PYCL076W)	-1.301	-2,017 to -0,5841	Yes	****	<0,0001
	0:Neg.Con. vs. 10-4:PMFA1	-1.927	-2,707 to -1,147	Yes	****	<0,0001					DIX27 (PPGK1) vs. DIX23 (PCSS1)	1.701	1,341 to 2,061	Yes	****	<0,0001	B-J				0:DIX14 (Neg.Con.) vs. 0.0001:DIX21 (PIME4)	-0.472	-1,252 to 0,3085	No	ns	0.9883					0:Neg.Con. vs. 10-4:PMFA1	0.001845	-0,1846 to 0,1883	No	ns	>0,9999					0:DIX14 (Neg.Con.) vs. 0.0001:DIX21 (PIME4)	-0.6225	-1,339 to 0,09416	No	ns	0.276
	0:Neg.Con. vs. 10-4:PFIG1	-1.639	-2,420 to -0,8590	Yes	****	<0,0001					DIX27 (PPGK1) vs. DIX24 (PFUS1)	-0.7028	-1,063 to -0,3428	Yes	****	<0,0001	B-K				0:DIX14 (Neg.Con.) vs. 0.0001:DIX22 (PHPF1)	0.2666	-0,5139 to 1,047	No	ns	>0,9999					0:Neg.Con. vs. 10-4:PFIG1	-0.1035	-0,2899 to 0,08295	No	ns	0.9985					0:DIX14 (Neg.Con.) vs. 0.0001:DIX22 (PHPF1)	-1.212	-1,928 to -0,4948	Yes	****	<0,0001
	0:Neg.Con. vs. 10-4:PAGA2	-1.985	-2,766 to -1,205	Yes	****	<0,0001					DIX27 (PPGK1) vs. DIX25 (PFIG1)	-0.3378	-0,6978 to 0,02214	No	ns	0.0798	B-L				0:DIX14 (Neg.Con.) vs. 0.0001:DIX23 (PCSS1)	0.1176	-0,6629 to 0,8981	No	ns	>0,9999					0:Neg.Con. vs. 10-4:PAGA2	-0.02844	-0,2149 to 0,1580	No	ns	>0,9999					0:DIX14 (Neg.Con.) vs. 0.0001:DIX23 (PCSS1)	-0.4407	-1,157 to 0,2760	No	ns	0.9835
	0:Neg.Con. vs. 10-4:PFUS1	-2.181	-2,961 to -1,401	Yes	****	<0,0001					DIX28 (PTDH3) vs. DIX17 (PMFA2)	-0.3766	-0,7365 to -0,01661	Yes	*	0.0348	C-D				0:DIX14 (Neg.Con.) vs. 0.0001:DIX24 (PFUS1)	-1.339	-2,120 to -0,5589	Yes	****	<0,0001					0:Neg.Con. vs. 10-4:PFUS1	-0.1135	-0,2999 to 0,07291	No	ns	0.9865					0:DIX14 (Neg.Con.) vs. 0.0001:DIX24 (PFUS1)	-2.068	-2,784 to -1,351	Yes	****	<0,0001
	0:Neg.Con. vs. 10-4:PMFA2	-3.307	-4,088 to -2,527	Yes	****	<0,0001					DIX28 (PTDH3) vs. DIX18 (PMFA1)	0.8385	0,4786 to 1,198	Yes	****	<0,0001	C-E				0:DIX14 (Neg.Con.) vs. 0.0001:DIX25 (PFIG1)	-1.264	-2,044 to -0,4834	Yes	****	<0,0001					0:Neg.Con. vs. 10-4:PMFA2	0.007343	-0,1791 to 0,1938	No	ns	>0,9999					0:DIX14 (Neg.Con.) vs. 0.0001:DIX25 (PFIG1)	-1.536	-2,253 to -0,8193	Yes	****	<0,0001
	0:Neg.Con. vs. 10-3:PCSS1	-1.086	-1,866 to -0,3054	Yes	****	<0,0001					DIX28 (PTDH3) vs. DIX19 (PAGA2)	0.5584	0,1985 to 0,9184	Yes	***	0.0005	C-F				0:DIX14 (Neg.Con.) vs. 0.001:DIX17 (PMFA2)	-1.121	-1,902 to -0,3406	Yes	****	<0,0001					0:Neg.Con. vs. 10-3:PCSS1	-0.1868	-0,3732 to -0,0003518	Yes	*	0.0486					0:DIX14 (Neg.Con.) vs. 0.001:DIX17 (PMFA2)	-3.773	-4,490 to -3,057	Yes	****	<0,0001
	0:Neg.Con. vs. 10-3:PIME4	-1.3	-2,081 to -0,5197	Yes	****	<0,0001					DIX28 (PTDH3) vs. DIX20 (PYCL076W)	1.038	0,6777 to 1,398	Yes	****	<0,0001	C-G				0:DIX14 (Neg.Con.) vs. 0.001:DIX18 (PMFA1)	-1.136	-1,916 to -0,3553	Yes	****	<0,0001					0:Neg.Con. vs. 10-3:PIME4	-0.2192	-0,4056 to -0,03278	Yes	**	0.0023					0:DIX14 (Neg.Con.) vs. 0.001:DIX18 (PMFA1)	-2.387	-3,104 to -1,671	Yes	****	<0,0001
	0:Neg.Con. vs. 10-3:PHPF1	-1.767	-2,547 to -0,9865	Yes	****	<0,0001					DIX28 (PTDH3) vs. DIX21 (PIME4)	1.917	1,557 to 2,277	Yes	****	<0,0001	C-H				0:DIX14 (Neg.Con.) vs. 0.001:DIX19 (PAGA2)	-1.433	-2,213 to -0,6525	Yes	****	<0,0001					0:Neg.Con. vs. 10-3:PHPF1	-0.09703	-0,2834 to 0,08939	No	ns	0.9998					0:DIX14 (Neg.Con.) vs. 0.001:DIX19 (PAGA2)	-2.415	-3,132 to -1,699	Yes	****	<0,0001
	0:Neg.Con. vs. 10-3:PYCL076W	-1.947	-2,727 to -1,166	Yes	****	<0,0001					DIX28 (PTDH3) vs. DIX22 (PHPF1)	2.079	1,719 to 2,439	Yes	****	<0,0001	C-I				0:DIX14 (Neg.Con.) vs. 0.001:DIX20 (PYCL076W)	-1.687	-2,467 to -0,9060	Yes	****	<0,0001					0:Neg.Con. vs. 10-3:PYCL076W	-0.1874	-0,3738 to -0,0009943	Yes	*	0.0461					0:DIX14 (Neg.Con.) vs. 0.001:DIX20 (PYCL076W)	-1.759	-2,476 to -1,043	Yes	****	<0,0001
	0:Neg.Con. vs. 10-3:PMFA1	-2.512	-3,293 to -1,732	Yes	****	<0,0001					DIX28 (PTDH3) vs. DIX23 (PCSS1)	2.635	2,275 to 2,995	Yes	****	<0,0001	C-J				0:DIX14 (Neg.Con.) vs. 0.001:DIX21 (PIME4)	-1.057	-1,838 to -0,2768	Yes	****	<0,0001					0:Neg.Con. vs. 10-3:PMFA1	-0.125	-0,3114 to 0,06143	No	ns	0.9235					0:DIX14 (Neg.Con.) vs. 0.001:DIX21 (PIME4)	-1.081	-1,798 to -0,3643	Yes	****	<0,0001
	0:Neg.Con. vs. 10-3:PFIG1	-2.225	-3,005 to -1,444	Yes	****	<0,0001					DIX28 (PTDH3) vs. DIX24 (PFUS1)	0.2313	-0,1286 to 0,5913	No	ns	0.4915	C-K				0:DIX14 (Neg.Con.) vs. 0.001:DIX22 (PHPF1)	-0.3187	-1,099 to 0,4618	No	ns	>0,9999					0:Neg.Con. vs. 10-3:PFIG1	-0.2303	-0,4167 to -0,04388	Yes	***	0.0007					0:DIX14 (Neg.Con.) vs. 0.001:DIX22 (PHPF1)	-1.67	-2,387 to -0,9533	Yes	****	<0,0001
	0:Neg.Con. vs. 10-3:PAGA2	-2.571	-3,351 to -1,790	Yes	****	<0,0001					DIX28 (PTDH3) vs. DIX25 (PFIG1)	0.5963	0,2363 to 0,9563	Yes	***	0.0002	C-L				0:DIX14 (Neg.Con.) vs. 0.001:DIX23 (PCSS1)	-0.4677	-1,248 to 0,3128	No	ns	0.9904					0:Neg.Con. vs. 10-3:PAGA2	-0.1553	-0,3417 to 0,03115	No	ns	0.3915					0:DIX14 (Neg.Con.) vs. 0.001:DIX23 (PCSS1)	-0.8991	-1,616 to -0,1824	Yes	***	0.0005
	0:Neg.Con. vs. 10-3:PFUS1	-2.766	-3,547 to -1,986	Yes	****	<0,0001					DIX17 (PMFA2) vs. DIX18 (PMFA1)	1.215	0,8551 to 1,575	Yes	****	<0,0001	D-E				0:DIX14 (Neg.Con.) vs. 0.001:DIX24 (PFUS1)	-1.925	-2,705 to -1,144	Yes	****	<0,0001					0:Neg.Con. vs. 10-3:PFUS1	-0.2403	-0,4268 to -0,05391	Yes	***	0.0002					0:DIX14 (Neg.Con.) vs. 0.001:DIX24 (PFUS1)	-2.526	-3,243 to -1,809	Yes	****	<0,0001
	0:Neg.Con. vs. 10-3:PMFA2	-3.893	-4,673 to -3,112	Yes	****	<0,0001					DIX17 (PMFA2) vs. DIX19 (PAGA2)	0.935	0,5751 to 1,295	Yes	****	<0,0001	D-F				0:DIX14 (Neg.Con.) vs. 0.001:DIX25 (PFIG1)	-1.849	-2,630 to -1,069	Yes	****	<0,0001					0:Neg.Con. vs. 10-3:PMFA2	-0.1195	-0,3059 to 0,06693	No	ns	0.9635					0:DIX14 (Neg.Con.) vs. 0.001:DIX25 (PFIG1)	-1.994	-2,711 to -1,278	Yes	****	<0,0001
	0:Neg.Con. vs. 10-2:PCSS1	-1.774	-2,554 to -0,9932	Yes	****	<0,0001					DIX17 (PMFA2) vs. DIX20 (PYCL076W)	1.414	1,054 to 1,774	Yes	****	<0,0001	D-G				0:DIX14 (Neg.Con.) vs. 0.01:DIX17 (PMFA2)	-1.809	-2,589 to -1,028	Yes	****	<0,0001					0:Neg.Con. vs. 10-2:PCSS1	-0.4938	-0,6802 to -0,3074	Yes	****	<0,0001					0:DIX14 (Neg.Con.) vs. 0.01:DIX17 (PMFA2)	-4.154	-4,871 to -3,437	Yes	****	<0,0001
	0:Neg.Con. vs. 10-2:PIME4	-1.988	-2,768 to -1,207	Yes	****	<0,0001					DIX17 (PMFA2) vs. DIX21 (PIME4)	2.294	1,934 to 2,654	Yes	****	<0,0001	D-H				0:DIX14 (Neg.Con.) vs. 0.01:DIX18 (PMFA1)	-1.824	-2,604 to -1,043	Yes	****	<0,0001					0:Neg.Con. vs. 10-2:PIME4	-0.5262	-0,7126 to -0,3398	Yes	****	<0,0001					0:DIX14 (Neg.Con.) vs. 0.01:DIX18 (PMFA1)	-2.768	-3,485 to -2,051	Yes	****	<0,0001
	0:Neg.Con. vs. 10-2:PHPF1	-2.455	-3,235 to -1,674	Yes	****	<0,0001					DIX17 (PMFA2) vs. DIX22 (PHPF1)	2.456	2,096 to 2,815	Yes	****	<0,0001	D-I				0:DIX14 (Neg.Con.) vs. 0.01:DIX19 (PAGA2)	-2.121	-2,901 to -1,340	Yes	****	<0,0001					0:Neg.Con. vs. 10-2:PHPF1	-0.4041	-0,5905 to -0,2176	Yes	****	<0,0001					0:DIX14 (Neg.Con.) vs. 0.01:DIX19 (PAGA2)	-2.796	-3,513 to -2,079	Yes	****	<0,0001
	0:Neg.Con. vs. 10-2:PYCL076W	-2.634	-3,415 to -1,854	Yes	****	<0,0001					DIX17 (PMFA2) vs. DIX23 (PCSS1)	3.012	2,652 to 3,372	Yes	****	<0,0001	D-J				0:DIX14 (Neg.Con.) vs. 0.01:DIX20 (PYCL076W)	-2.374	-3,155 to -1,594	Yes	****	<0,0001					0:Neg.Con. vs. 10-2:PYCL076W	-0.4944	-0,6809 to -0,3080	Yes	****	<0,0001					0:DIX14 (Neg.Con.) vs. 0.01:DIX20 (PYCL076W)	-2.14	-2,857 to -1,423	Yes	****	<0,0001
	0:Neg.Con. vs. 10-2:PMFA1	-3.2	-3,980 to -2,420	Yes	****	<0,0001					DIX17 (PMFA2) vs. DIX24 (PFUS1)	0.6079	0,2480 to 0,9679	Yes	***	0.0001	D-K				0:DIX14 (Neg.Con.) vs. 0.01:DIX21 (PIME4)	-1.745	-2,525 to -0,9645	Yes	****	<0,0001					0:Neg.Con. vs. 10-2:PMFA1	-0.432	-0,6184 to -0,2456	Yes	****	<0,0001					0:DIX14 (Neg.Con.) vs. 0.01:DIX21 (PIME4)	-1.462	-2,178 to -0,7450	Yes	****	<0,0001
	0:Neg.Con. vs. 10-2:PFIG1	-2.912	-3,693 to -2,132	Yes	****	<0,0001					DIX17 (PMFA2) vs. DIX25 (PFIG1)	0.9729	0,6129 to 1,333	Yes	****	<0,0001	D-L				0:DIX14 (Neg.Con.) vs. 0.01:DIX22 (PHPF1)	-1.006	-1,787 to -0,2260	Yes	***	0.0002					0:Neg.Con. vs. 10-2:PFIG1	-0.5373	-0,7237 to -0,3509	Yes	****	<0,0001					0:DIX14 (Neg.Con.) vs. 0.01:DIX22 (PHPF1)	-2.051	-2,767 to -1,334	Yes	****	<0,0001
	0:Neg.Con. vs. 10-2:PAGA2	-3.258	-4,039 to -2,478	Yes	****	<0,0001					DIX18 (PMFA1) vs. DIX19 (PAGA2)	-0.2801	-0,6400 to 0,07988	No	ns	0.2384	E-F				0:DIX14 (Neg.Con.) vs. 0.01:DIX23 (PCSS1)	-1.155	-1,936 to -0,3750	Yes	****	<0,0001					0:Neg.Con. vs. 10-2:PAGA2	-0.4623	-0,6487 to -0,2759	Yes	****	<0,0001					0:DIX14 (Neg.Con.) vs. 0.01:DIX23 (PCSS1)	-1.28	-1,997 to -0,5632	Yes	****	<0,0001
	0:Neg.Con. vs. 10-2:PFUS1	-3.454	-4,235 to -2,674	Yes	****	<0,0001					DIX18 (PMFA1) vs. DIX20 (PYCL076W)	0.1991	-0,1609 to 0,5591	No	ns	0.6928	E-G				0:DIX14 (Neg.Con.) vs. 0.01:DIX24 (PFUS1)	-2.612	-3,393 to -1,832	Yes	****	<0,0001					0:Neg.Con. vs. 10-2:PFUS1	-0.5474	-0,7338 to -0,3609	Yes	****	<0,0001					0:DIX14 (Neg.Con.) vs. 0.01:DIX24 (PFUS1)	-2.907	-3,623 to -2,190	Yes	****	<0,0001
	0:Neg.Con. vs. 10-2:PMFA2	-4.58	-5,361 to -3,800	Yes	****	<0,0001					DIX18 (PMFA1) vs. DIX21 (PIME4)	1.079	0,7187 to 1,439	Yes	****	<0,0001	E-H				0:DIX14 (Neg.Con.) vs. 0.01:DIX25 (PFIG1)	-2.537	-3,317 to -1,756	Yes	****	<0,0001					0:Neg.Con. vs. 10-2:PMFA2	-0.4265	-0,6129 to -0,2401	Yes	****	<0,0001					0:DIX14 (Neg.Con.) vs. 0.01:DIX25 (PFIG1)	-2.375	-3,092 to -1,658	Yes	****	<0,0001
	0:Neg.Con. vs. 10-1:Neg.Con.	-1.317	-1,725 to -0,9097	Yes	****	<0,0001					DIX18 (PMFA1) vs. DIX22 (PHPF1)	1.24	0,8805 to 1,600	Yes	****	<0,0001	E-I				0:DIX14 (Neg.Con.) vs. 0.1:DIX14 (Neg.Con.)	-1.317	-1,725 to -0,9097	Yes	****	<0,0001					0:Neg.Con. vs. 10-1:Neg.Con.	-0.5341	-0,6314 to -0,4367	Yes	****	<0,0001					0:DIX14 (Neg.Con.) vs. 0.1:DIX14 (Neg.Con.)	-0.7832	-1,158 to -0,4090	Yes	****	<0,0001
	0:Neg.Con. vs. 10-1:PPGK1	-3.645	-4,556 to -2,733	Yes	****	<0,0001					DIX18 (PMFA1) vs. DIX23 (PCSS1)	1.797	1,437 to 2,157	Yes	****	<0,0001	E-J				0:DIX14 (Neg.Con.) vs. 0.1:DIX27 (PPGK1)	-1.31	-2,222 to -0,3990	Yes	****	<0,0001					0:Neg.Con. vs. 10-1:PPGK1	-0.5051	-0,7228 to -0,2874	Yes	****	<0,0001					0:DIX14 (Neg.Con.) vs. 0.1:DIX27 (PPGK1)	-3.139	-3,976 to -2,303	Yes	****	<0,0001
	0:Neg.Con. vs. 10-1:PTDH3	-4.589	-5,500 to -3,678	Yes	****	<0,0001					DIX18 (PMFA1) vs. DIX24 (PFUS1)	-0.6072	-0,9671 to -0,2472	Yes	***	0.0001	E-K				0:DIX14 (Neg.Con.) vs. 0.1:DIX28 (PTDH3)	-1.335	-2,247 to -0,4238	Yes	****	<0,0001					0:Neg.Con. vs. 10-1:PTDH3	-0.534	-0,7517 to -0,3163	Yes	****	<0,0001					0:DIX14 (Neg.Con.) vs. 0.1:DIX28 (PTDH3)	-4.055	-4,892 to -3,218	Yes	****	<0,0001
	0:Neg.Con. vs. 10-1:PCSS1	-1.9	-2,704 to -1,097	Yes	****	<0,0001					DIX18 (PMFA1) vs. DIX25 (PFIG1)	-0.2422	-0,6022 to 0,1177	No	ns	0.4265	E-L				0:DIX14 (Neg.Con.) vs. 0.1:DIX17 (PMFA2)	-1.936	-2,739 to -1,132	Yes	****	<0,0001					0:Neg.Con. vs. 10-1:PCSS1	-0.6183	-0,8103 to -0,4264	Yes	****	<0,0001					0:DIX14 (Neg.Con.) vs. 0.1:DIX17 (PMFA2)	-4.156	-4,894 to -3,418	Yes	****	<0,0001
	0:Neg.Con. vs. 10-1:PIME4	-2.115	-2,918 to -1,311	Yes	****	<0,0001					DIX19 (PAGA2) vs. DIX20 (PYCL076W)	0.4792	0,1192 to 0,8391	Yes	**	0.0032	F-G				0:DIX14 (Neg.Con.) vs. 0.1:DIX18 (PMFA1)	-1.95	-2,754 to -1,146	Yes	****	<0,0001					0:Neg.Con. vs. 10-1:PIME4	-0.6508	-0,8428 to -0,4588	Yes	****	<0,0001					0:DIX14 (Neg.Con.) vs. 0.1:DIX18 (PMFA1)	-2.77	-3,508 to -2,032	Yes	****	<0,0001
	0:Neg.Con. vs. 10-1:PHPF1	-2.581	-3,385 to -1,778	Yes	****	<0,0001					DIX19 (PAGA2) vs. DIX21 (PIME4)	1.359	0,9988 to 1,719	Yes	****	<0,0001	F-H				0:DIX14 (Neg.Con.) vs. 0.1:DIX19 (PAGA2)	-2.247	-3,051 to -1,444	Yes	****	<0,0001					0:Neg.Con. vs. 10-1:PHPF1	-0.5286	-0,7206 to -0,3366	Yes	****	<0,0001					0:DIX14 (Neg.Con.) vs. 0.1:DIX19 (PAGA2)	-2.798	-3,536 to -2,060	Yes	****	<0,0001
	0:Neg.Con. vs. 10-1:PYCL076W	-2.761	-3,565 to -1,957	Yes	****	<0,0001					DIX19 (PAGA2) vs. DIX22 (PHPF1)	1.521	1,161 to 1,880	Yes	****	<0,0001	F-I				0:DIX14 (Neg.Con.) vs. 0.1:DIX20 (PYCL076W)	-2.501	-3,305 to -1,697	Yes	****	<0,0001					0:Neg.Con. vs. 10-1:PYCL076W	-0.619	-0,8110 to -0,4270	Yes	****	<0,0001					0:DIX14 (Neg.Con.) vs. 0.1:DIX20 (PYCL076W)	-2.142	-2,880 to -1,404	Yes	****	<0,0001
	0:Neg.Con. vs. 10-1:PMFA1	-3.327	-4,130 to -2,523	Yes	****	<0,0001					DIX19 (PAGA2) vs. DIX23 (PCSS1)	2.077	1,717 to 2,437	Yes	****	<0,0001	F-J				0:DIX14 (Neg.Con.) vs. 0.1:DIX21 (PIME4)	-1.872	-2,675 to -1,068	Yes	****	<0,0001					0:Neg.Con. vs. 10-1:PMFA1	-0.5566	-0,7485 to -0,3646	Yes	****	<0,0001					0:DIX14 (Neg.Con.) vs. 0.1:DIX21 (PIME4)	-1.464	-2,202 to -0,7258	Yes	****	<0,0001
	0:Neg.Con. vs. 10-1:PFIG1	-3.039	-3,843 to -2,235	Yes	****	<0,0001					DIX19 (PAGA2) vs. DIX24 (PFUS1)	-0.3271	-0,6871 to 0,03287	No	ns	0.0993	F-K				0:DIX14 (Neg.Con.) vs. 0.1:DIX22 (PHPF1)	-1.133	-1,937 to -0,3294	Yes	****	<0,0001					0:Neg.Con. vs. 10-1:PFIG1	-0.6619	-0,8539 to -0,4699	Yes	****	<0,0001					0:DIX14 (Neg.Con.) vs. 0.1:DIX22 (PHPF1)	-2.053	-2,791 to -1,315	Yes	****	<0,0001
	0:Neg.Con. vs. 10-1:PAGA2	-3.385	-4,189 to -2,581	Yes	****	<0,0001					DIX19 (PAGA2) vs. DIX25 (PFIG1)	0.03784	-0,3221 to 0,3978	No	ns	>0,9999	F-L				0:DIX14 (Neg.Con.) vs. 0.1:DIX23 (PCSS1)	-1.282	-2,086 to -0,4784	Yes	****	<0,0001					0:Neg.Con. vs. 10-1:PAGA2	-0.5868	-0,7788 to -0,3949	Yes	****	<0,0001					0:DIX14 (Neg.Con.) vs. 0.1:DIX23 (PCSS1)	-1.282	-2,020 to -0,5439	Yes	****	<0,0001
	0:Neg.Con. vs. 10-1:PFUS1	-3.581	-4,385 to -2,777	Yes	****	<0,0001					DIX20 (PYCL076W) vs. DIX21 (PIME4)	0.8796	0,5196 to 1,240	Yes	****	<0,0001	G-H				0:DIX14 (Neg.Con.) vs. 0.1:DIX24 (PFUS1)	-2.739	-3,543 to -1,935	Yes	****	<0,0001					0:Neg.Con. vs. 10-1:PFUS1	-0.6719	-0,8639 to -0,4799	Yes	****	<0,0001					0:DIX14 (Neg.Con.) vs. 0.1:DIX24 (PFUS1)	-2.909	-3,647 to -2,171	Yes	****	<0,0001
	0:Neg.Con. vs. 10-1:PMFA2	-4.707	-5,511 to -3,903	Yes	****	<0,0001					DIX20 (PYCL076W) vs. DIX22 (PHPF1)	1.041	0,6814 to 1,401	Yes	****	<0,0001	G-I				0:DIX14 (Neg.Con.) vs. 0.1:DIX25 (PFIG1)	-2.664	-3,467 to -1,860	Yes	****	<0,0001					0:Neg.Con. vs. 10-1:PMFA2	-0.5511	-0,7430 to -0,3591	Yes	****	<0,0001					0:DIX14 (Neg.Con.) vs. 0.1:DIX25 (PFIG1)	-2.377	-3,115 to -1,639	Yes	****	<0,0001
	0:Neg.Con. vs. 100:PCSS1	-2.063	-2,844 to -1,283	Yes	****	<0,0001					DIX20 (PYCL076W) vs. DIX23 (PCSS1)	1.598	1,238 to 1,958	Yes	****	<0,0001	G-J				0:DIX14 (Neg.Con.) vs. 1:DIX17 (PMFA2)	-2.098	-2,879 to -1,318	Yes	****	<0,0001					0:Neg.Con. vs. 100:PCSS1	-0.6612	-0,8476 to -0,4748	Yes	****	<0,0001					0:DIX14 (Neg.Con.) vs. 1:DIX17 (PMFA2)	-4.276	-4,993 to -3,559	Yes	****	<0,0001
	0:Neg.Con. vs. 100:PIME4	-2.278	-3,058 to -1,497	Yes	****	<0,0001					DIX20 (PYCL076W) vs. DIX24 (PFUS1)	-0.8063	-1,166 to -0,4463	Yes	****	<0,0001	G-K				0:DIX14 (Neg.Con.) vs. 1:DIX18 (PMFA1)	-2.113	-2,894 to -1,333	Yes	****	<0,0001					0:Neg.Con. vs. 100:PIME4	-0.6936	-0,8800 to -0,5072	Yes	****	<0,0001					0:DIX14 (Neg.Con.) vs. 1:DIX18 (PMFA1)	-2.89	-3,607 to -2,174	Yes	****	<0,0001
	0:Neg.Con. vs. 100:PHPF1	-2.744	-3,525 to -1,964	Yes	****	<0,0001					DIX20 (PYCL076W) vs. DIX25 (PFIG1)	-0.4413	-0,8013 to -0,08137	Yes	**	0.0078	G-L				0:DIX14 (Neg.Con.) vs. 1:DIX19 (PAGA2)	-2.41	-3,191 to -1,630	Yes	****	<0,0001					0:Neg.Con. vs. 100:PHPF1	-0.5715	-0,7579 to -0,3850	Yes	****	<0,0001					0:DIX14 (Neg.Con.) vs. 1:DIX19 (PAGA2)	-2.918	-3,635 to -2,202	Yes	****	<0,0001
	0:Neg.Con. vs. 100:PYCL076W	-2.924	-3,705 to -2,144	Yes	****	<0,0001					DIX21 (PIME4) vs. DIX22 (PHPF1)	0.1618	-0,1982 to 0,5217	No	ns	0.885	H-I				0:DIX14 (Neg.Con.) vs. 1:DIX20 (PYCL076W)	-2.664	-3,444 to -1,883	Yes	****	<0,0001					0:Neg.Con. vs. 100:PYCL076W	-0.6618	-0,8483 to -0,4754	Yes	****	<0,0001					0:DIX14 (Neg.Con.) vs. 1:DIX20 (PYCL076W)	-2.262	-2,979 to -1,546	Yes	****	<0,0001
	0:Neg.Con. vs. 100:PMFA1	-3.49	-4,270 to -2,709	Yes	****	<0,0001					DIX21 (PIME4) vs. DIX23 (PCSS1)	0.7181	0,3581 to 1,078	Yes	****	<0,0001	H-J				0:DIX14 (Neg.Con.) vs. 1:DIX21 (PIME4)	-2.035	-2,815 to -1,254	Yes	****	<0,0001					0:Neg.Con. vs. 100:PMFA1	-0.5994	-0,7858 to -0,4130	Yes	****	<0,0001					0:DIX14 (Neg.Con.) vs. 1:DIX21 (PIME4)	-1.584	-2,301 to -0,8673	Yes	****	<0,0001
	0:Neg.Con. vs. 100:PFIG1	-3.202	-3,983 to -2,422	Yes	****	<0,0001					DIX21 (PIME4) vs. DIX24 (PFUS1)	-1.686	-2,046 to -1,326	Yes	****	<0,0001	H-K				0:DIX14 (Neg.Con.) vs. 1:DIX22 (PHPF1)	-1.296	-2,077 to -0,5156	Yes	****	<0,0001					0:Neg.Con. vs. 100:PFIG1	-0.7047	-0,8911 to -0,5183	Yes	****	<0,0001					0:DIX14 (Neg.Con.) vs. 1:DIX22 (PHPF1)	-2.173	-2,890 to -1,456	Yes	****	<0,0001
	0:Neg.Con. vs. 100:PAGA2	-3.548	-4,329 to -2,768	Yes	****	<0,0001					DIX21 (PIME4) vs. DIX25 (PFIG1)	-1.321	-1,681 to -0,9609	Yes	****	<0,0001	H-L				0:DIX14 (Neg.Con.) vs. 1:DIX23 (PCSS1)	-1.445	-2,226 to -0,6646	Yes	****	<0,0001					0:Neg.Con. vs. 100:PAGA2	-0.6297	-0,8161 to -0,4433	Yes	****	<0,0001					0:DIX14 (Neg.Con.) vs. 1:DIX23 (PCSS1)	-1.402	-2,119 to -0,6854	Yes	****	<0,0001
	0:Neg.Con. vs. 100:PFUS1	-3.744	-4,524 to -2,963	Yes	****	<0,0001					DIX22 (PHPF1) vs. DIX23 (PCSS1)	0.5563	0,1963 to 0,9163	Yes	***	0.0005	I-J				0:DIX14 (Neg.Con.) vs. 1:DIX24 (PFUS1)	-2.902	-3,683 to -2,122	Yes	****	<0,0001					0:Neg.Con. vs. 100:PFUS1	-0.7148	-0,9012 to -0,5283	Yes	****	<0,0001					0:DIX14 (Neg.Con.) vs. 1:DIX24 (PFUS1)	-3.029	-3,746 to -2,312	Yes	****	<0,0001
	0:Neg.Con. vs. 100:PMFA2	-4.87	-5,651 to -4,090	Yes	****	<0,0001					DIX22 (PHPF1) vs. DIX24 (PFUS1)	-1.848	-2,208 to -1,488	Yes	****	<0,0001	I-K				0:DIX14 (Neg.Con.) vs. 1:DIX25 (PFIG1)	-2.827	-3,607 to -2,046	Yes	****	<0,0001					0:Neg.Con. vs. 100:PMFA2	-0.5939	-0,7803 to -0,4075	Yes	****	<0,0001					0:DIX14 (Neg.Con.) vs. 1:DIX25 (PFIG1)	-2.497	-3,214 to -1,781	Yes	****	<0,0001
	0:Neg.Con. vs. 101:PCSS1	-2.003	-2,783 to -1,222	Yes	****	<0,0001					DIX22 (PHPF1) vs. DIX25 (PFIG1)	-1.483	-1,843 to -1,123	Yes	****	<0,0001	I-L				0:DIX14 (Neg.Con.) vs. 10:DIX17 (PMFA2)	-2.038	-2,818 to -1,258	Yes	****	<0,0001					0:Neg.Con. vs. 101:PCSS1	-0.5869	-0,7734 to -0,4005	Yes	****	<0,0001					0:DIX14 (Neg.Con.) vs. 10:DIX17 (PMFA2)	-4.29	-5,007 to -3,573	Yes	****	<0,0001
	0:Neg.Con. vs. 101:PIME4	-2.217	-2,998 to -1,437	Yes	****	<0,0001					DIX23 (PCSS1) vs. DIX24 (PFUS1)	-2.404	-2,764 to -2,044	Yes	****	<0,0001	J-K				0:DIX14 (Neg.Con.) vs. 10:DIX18 (PMFA1)	-2.053	-2,833 to -1,272	Yes	****	<0,0001					0:Neg.Con. vs. 101:PIME4	-0.6194	-0,8058 to -0,4330	Yes	****	<0,0001					0:DIX14 (Neg.Con.) vs. 10:DIX18 (PMFA1)	-2.904	-3,621 to -2,187	Yes	****	<0,0001
	0:Neg.Con. vs. 101:PHPF1	-2.684	-3,464 to -1,903	Yes	****	<0,0001					DIX23 (PCSS1) vs. DIX25 (PFIG1)	-2.039	-2,399 to -1,679	Yes	****	<0,0001	J-L				0:DIX14 (Neg.Con.) vs. 10:DIX19 (PAGA2)	-2.35	-3,130 to -1,569	Yes	****	<0,0001					0:Neg.Con. vs. 101:PHPF1	-0.4972	-0,6836 to -0,3108	Yes	****	<0,0001					0:DIX14 (Neg.Con.) vs. 10:DIX19 (PAGA2)	-2.932	-3,649 to -2,215	Yes	****	<0,0001
	0:Neg.Con. vs. 101:PYCL076W	-2.864	-3,644 to -2,083	Yes	****	<0,0001					DIX24 (PFUS1) vs. DIX25 (PFIG1)	0.3649	0,004976 to 0,7249	Yes	*	0.0449	K-L				0:DIX14 (Neg.Con.) vs. 10:DIX20 (PYCL076W)	-2.603	-3,384 to -1,823	Yes	****	<0,0001					0:Neg.Con. vs. 101:PYCL076W	-0.5876	-0,7740 to -0,4012	Yes	****	<0,0001					0:DIX14 (Neg.Con.) vs. 10:DIX20 (PYCL076W)	-2.276	-2,993 to -1,559	Yes	****	<0,0001
	0:Neg.Con. vs. 101:PMFA1	-3.429	-4,210 to -2,649	Yes	****	<0,0001															0:DIX14 (Neg.Con.) vs. 10:DIX21 (PIME4)	-1.974	-2,755 to -1,194	Yes	****	<0,0001					0:Neg.Con. vs. 101:PMFA1	-0.5252	-0,7116 to -0,3387	Yes	****	<0,0001					0:DIX14 (Neg.Con.) vs. 10:DIX21 (PIME4)	-1.598	-2,314 to -0,8810	Yes	****	<0,0001
	0:Neg.Con. vs. 101:PFIG1	-3.142	-3,922 to -2,361	Yes	****	<0,0001					Test details	Mean 1	Mean 2	Mean Diff,	SE of diff,	n1	n2	q	DF		0:DIX14 (Neg.Con.) vs. 10:DIX22 (PHPF1)	-1.236	-2,016 to -0,4551	Yes	****	<0,0001					0:Neg.Con. vs. 101:PFIG1	-0.6305	-0,8169 to -0,4441	Yes	****	<0,0001					0:DIX14 (Neg.Con.) vs. 10:DIX22 (PHPF1)	-2.187	-2,903 to -1,470	Yes	****	<0,0001
	0:Neg.Con. vs. 101:PAGA2	-3.488	-4,268 to -2,707	Yes	****	<0,0001					DIX14 (Neg.Con.) vs. DIX27 (PPGK1)	3.987	6.328	-2.34	0.09983	3	3	33.15	24		0:DIX14 (Neg.Con.) vs. 10:DIX23 (PCSS1)	-1.385	-2,165 to -0,6041	Yes	****	<0,0001					0:Neg.Con. vs. 101:PAGA2	-0.5554	-0,7419 to -0,3690	Yes	****	<0,0001					0:DIX14 (Neg.Con.) vs. 10:DIX23 (PCSS1)	-1.416	-2,133 to -0,6992	Yes	****	<0,0001
	0:Neg.Con. vs. 101:PFUS1	-3.683	-4,464 to -2,903	Yes	****	<0,0001					DIX14 (Neg.Con.) vs. DIX28 (PTDH3)	3.987	7.262	-3.275	0.09983	3	3	46.39	24		0:DIX14 (Neg.Con.) vs. 10:DIX24 (PFUS1)	-2.842	-3,622 to -2,061	Yes	****	<0,0001					0:Neg.Con. vs. 101:PFUS1	-0.6405	-0,8269 to -0,4541	Yes	****	<0,0001					0:DIX14 (Neg.Con.) vs. 10:DIX24 (PFUS1)	-3.043	-3,759 to -2,326	Yes	****	<0,0001
	0:Neg.Con. vs. 101:PMFA2	-4.81	-5,590 to -4,029	Yes	****	<0,0001					DIX14 (Neg.Con.) vs. DIX17 (PMFA2)	3.987	7.639	-3.651	0.09983	3	3	51.72	24		0:DIX14 (Neg.Con.) vs. 10:DIX25 (PFIG1)	-2.766	-3,547 to -1,986	Yes	****	<0,0001					0:Neg.Con. vs. 101:PMFA2	-0.5197	-0,7061 to -0,3332	Yes	****	<0,0001					0:DIX14 (Neg.Con.) vs. 10:DIX25 (PFIG1)	-2.511	-3,228 to -1,794	Yes	****	<0,0001
	0:Neg.Con. vs. 102:Neg.Con.	-1.355	-1,763 to -0,9476	Yes	****	<0,0001					DIX14 (Neg.Con.) vs. DIX18 (PMFA1)	3.987	6.424	-2.436	0.09983	3	3	34.51	24		0:DIX14 (Neg.Con.) vs. 100:DIX14 (Neg.Con.)	-1.355	-1,763 to -0,9476	Yes	****	<0,0001					0:Neg.Con. vs. 102:Neg.Con.	-0.521	-0,6183 to -0,4236	Yes	****	<0,0001					0:DIX14 (Neg.Con.) vs. 100:DIX14 (Neg.Con.)	-0.8342	-1,208 to -0,4600	Yes	****	<0,0001
	0:Neg.Con. vs. 102:PPGK1	-3.682	-4,594 to -2,771	Yes	****	<0,0001					DIX14 (Neg.Con.) vs. DIX19 (PAGA2)	3.987	6.704	-2.716	0.09983	3	3	38.48	24		0:DIX14 (Neg.Con.) vs. 100:DIX27 (PPGK1)	-1.348	-2,260 to -0,4369	Yes	****	<0,0001					0:Neg.Con. vs. 102:PPGK1	-0.4921	-0,7097 to -0,2744	Yes	****	<0,0001					0:DIX14 (Neg.Con.) vs. 100:DIX27 (PPGK1)	-3.19	-4,027 to -2,354	Yes	****	<0,0001
	0:Neg.Con. vs. 102:PTDH3	-4.627	-5,538 to -3,715	Yes	****	<0,0001					DIX14 (Neg.Con.) vs. DIX20 (PYCL076W)	3.987	6.224	-2.237	0.09983	3	3	31.69	24		0:DIX14 (Neg.Con.) vs. 100:DIX28 (PTDH3)	-1.373	-2,285 to -0,4618	Yes	****	<0,0001					0:Neg.Con. vs. 102:PTDH3	-0.521	-0,7386 to -0,3033	Yes	****	<0,0001					0:DIX14 (Neg.Con.) vs. 100:DIX28 (PTDH3)	-4.106	-4,943 to -3,269	Yes	****	<0,0001
	0:Neg.Con. vs. 102:PCSS1	-1.938	-2,742 to -1,134	Yes	****	<0,0001					DIX14 (Neg.Con.) vs. DIX21 (PIME4)	3.987	5.345	-1.357	0.09983	3	3	19.23	24		0:DIX14 (Neg.Con.) vs. 100:DIX17 (PMFA2)	-1.973	-2,777 to -1,170	Yes	****	<0,0001					0:Neg.Con. vs. 102:PCSS1	-0.6053	-0,7973 to -0,4133	Yes	****	<0,0001					0:DIX14 (Neg.Con.) vs. 100:DIX17 (PMFA2)	-4.207	-4,945 to -3,469	Yes	****	<0,0001
	0:Neg.Con. vs. 102:PIME4	-2.153	-2,956 to -1,349	Yes	****	<0,0001					DIX14 (Neg.Con.) vs. DIX22 (PHPF1)	3.987	5.183	-1.196	0.09983	3	3	16.94	24		0:DIX14 (Neg.Con.) vs. 100:DIX18 (PMFA1)	-1.988	-2,792 to -1,184	Yes	****	<0,0001					0:Neg.Con. vs. 102:PIME4	-0.6377	-0,8297 to -0,4457	Yes	****	<0,0001					0:DIX14 (Neg.Con.) vs. 100:DIX18 (PMFA1)	-2.821	-3,559 to -2,083	Yes	****	<0,0001
	0:Neg.Con. vs. 102:PHPF1	-2.619	-3,423 to -1,816	Yes	****	<0,0001					DIX14 (Neg.Con.) vs. DIX23 (PCSS1)	3.987	4.627	-0.6393	0.09983	3	3	9.056	24		0:DIX14 (Neg.Con.) vs. 100:DIX19 (PAGA2)	-2.285	-3,089 to -1,482	Yes	****	<0,0001					0:Neg.Con. vs. 102:PHPF1	-0.5155	-0,7075 to -0,3236	Yes	****	<0,0001					0:DIX14 (Neg.Con.) vs. 100:DIX19 (PAGA2)	-2.849	-3,587 to -2,111	Yes	****	<0,0001
	0:Neg.Con. vs. 102:PYCL076W	-2.799	-3,603 to -1,995	Yes	****	<0,0001					DIX14 (Neg.Con.) vs. DIX24 (PFUS1)	3.987	7.031	-3.043	0.09983	3	3	43.11	24		0:DIX14 (Neg.Con.) vs. 100:DIX20 (PYCL076W)	-2.539	-3,343 to -1,735	Yes	****	<0,0001					0:Neg.Con. vs. 102:PYCL076W	-0.6059	-0,7979 to -0,4139	Yes	****	<0,0001					0:DIX14 (Neg.Con.) vs. 100:DIX20 (PYCL076W)	-2.193	-2,931 to -1,455	Yes	****	<0,0001
	0:Neg.Con. vs. 102:PMFA1	-3.365	-4,168 to -2,561	Yes	****	<0,0001					DIX14 (Neg.Con.) vs. DIX25 (PFIG1)	3.987	6.666	-2.678	0.09983	3	3	37.94	24		0:DIX14 (Neg.Con.) vs. 100:DIX21 (PIME4)	-1.91	-2,713 to -1,106	Yes	****	<0,0001					0:Neg.Con. vs. 102:PMFA1	-0.5435	-0,7355 to -0,3515	Yes	****	<0,0001					0:DIX14 (Neg.Con.) vs. 100:DIX21 (PIME4)	-1.515	-2,253 to -0,7767	Yes	****	<0,0001
	0:Neg.Con. vs. 102:PFIG1	-3.077	-3,881 to -2,273	Yes	****	<0,0001					DIX27 (PPGK1) vs. DIX28 (PTDH3)	6.328	7.262	-0.9341	0.09983	3	3	13.23	24		0:DIX14 (Neg.Con.) vs. 100:DIX22 (PHPF1)	-1.171	-1,975 to -0,3673	Yes	****	<0,0001					0:Neg.Con. vs. 102:PFIG1	-0.6488	-0,8408 to -0,4568	Yes	****	<0,0001					0:DIX14 (Neg.Con.) vs. 100:DIX22 (PHPF1)	-2.104	-2,842 to -1,366	Yes	****	<0,0001
	0:Neg.Con. vs. 102:PAGA2	-3.423	-4,227 to -2,619	Yes	****	<0,0001					DIX27 (PPGK1) vs. DIX17 (PMFA2)	6.328	7.639	-1.311	0.09983	3	3	18.57	24		0:DIX14 (Neg.Con.) vs. 100:DIX23 (PCSS1)	-1.32	-2,124 to -0,5163	Yes	****	<0,0001					0:Neg.Con. vs. 102:PAGA2	-0.5738	-0,7658 to -0,3818	Yes	****	<0,0001					0:DIX14 (Neg.Con.) vs. 100:DIX23 (PCSS1)	-1.333	-2,071 to -0,5949	Yes	****	<0,0001
	0:Neg.Con. vs. 102:PFUS1	-3.619	-4,422 to -2,815	Yes	****	<0,0001					DIX27 (PPGK1) vs. DIX18 (PMFA1)	6.328	6.424	-0.09559	0.09983	3	3	1.354	24		0:DIX14 (Neg.Con.) vs. 100:DIX24 (PFUS1)	-2.777	-3,581 to -1,973	Yes	****	<0,0001					0:Neg.Con. vs. 102:PFUS1	-0.6588	-0,8508 to -0,4669	Yes	****	<0,0001					0:DIX14 (Neg.Con.) vs. 100:DIX24 (PFUS1)	-2.96	-3,698 to -2,222	Yes	****	<0,0001
	0:Neg.Con. vs. 102:PMFA2	-4.745	-5,549 to -3,941	Yes	****	<0,0001					DIX27 (PPGK1) vs. DIX19 (PAGA2)	6.328	6.704	-0.3757	0.09983	3	3	5.322	24		0:DIX14 (Neg.Con.) vs. 100:DIX25 (PFIG1)	-2.702	-3,505 to -1,898	Yes	****	<0,0001					0:Neg.Con. vs. 102:PMFA2	-0.538	-0,7300 to -0,3460	Yes	****	<0,0001					0:DIX14 (Neg.Con.) vs. 100:DIX25 (PFIG1)	-2.428	-3,166 to -1,690	Yes	****	<0,0001
	0:PPGK1 vs. 0:PTDH3	-0.9444	-1,760 to -0,1292	Yes	**	0.0033					DIX27 (PPGK1) vs. DIX20 (PYCL076W)	6.328	6.224	0.1035	0.09983	3	3	1.466	24		0:DIX27 (PPGK1) vs. 0:DIX28 (PTDH3)	-0.02484	-0,8400 to 0,7903	No	ns	>0,9999					0:PPGK1 vs. 0:PTDH3	-0.02889	-0,2236 to 0,1658	No	ns	>0,9999					0:DIX27 (PPGK1) vs. 0:DIX28 (PTDH3)	-0.9155	-1,664 to -0,1669	Yes	***	0.0009
	0:PPGK1 vs. 0:PCSS1	1.744	1,051 to 2,437	Yes	****	<0,0001					DIX27 (PPGK1) vs. DIX21 (PIME4)	6.328	5.345	0.9831	0.09983	3	3	13.93	24		0:DIX27 (PPGK1) vs. 0:DIX17 (PMFA2)	-0.6251	-1,318 to 0,06766	No	ns	0.189					0:PPGK1 vs. 0:PCSS1	-0.1132	-0,2787 to 0,05224	No	ns	0.8971					0:DIX27 (PPGK1) vs. 0:DIX17 (PMFA2)	-1.017	-1,653 to -0,3805	Yes	****	<0,0001
	0:PPGK1 vs. 0:PIME4	1.53	0,8372 to 2,223	Yes	****	<0,0001					DIX27 (PPGK1) vs. DIX22 (PHPF1)	6.328	5.183	1.145	0.09983	3	3	16.22	24		0:DIX27 (PPGK1) vs. 0:DIX18 (PMFA1)	-0.6398	-1,333 to 0,05296	No	ns	0.1456					0:PPGK1 vs. 0:PIME4	-0.1457	-0,3111 to 0,01982	No	ns	0.2435					0:DIX27 (PPGK1) vs. 0:DIX18 (PMFA1)	0.3693	-0,2669 to 1,005	No	ns	0.9954
	0:PPGK1 vs. 0:PHPF1	1.063	0,3704 to 1,756	Yes	****	<0,0001					DIX27 (PPGK1) vs. DIX23 (PCSS1)	6.328	4.627	1.701	0.09983	3	3	24.1	24		0:DIX27 (PPGK1) vs. 0:DIX19 (PAGA2)	-0.937	-1,630 to -0,2443	Yes	****	<0,0001					0:PPGK1 vs. 0:PHPF1	-0.02348	-0,1890 to 0,1420	No	ns	>0,9999					0:DIX27 (PPGK1) vs. 0:DIX19 (PAGA2)	0.3412	-0,2949 to 0,9773	No	ns	0.9994
	0:PPGK1 vs. 0:PYCL076W	0.8835	0,1907 to 1,576	Yes	***	0.0003					DIX27 (PPGK1) vs. DIX24 (PFUS1)	6.328	7.031	-0.7028	0.09983	3	3	9.955	24		0:DIX27 (PPGK1) vs. 0:DIX20 (PYCL076W)	-1.191	-1,883 to -0,4978	Yes	****	<0,0001					0:PPGK1 vs. 0:PYCL076W	-0.1139	-0,2793 to 0,05160	No	ns	0.8887					0:DIX27 (PPGK1) vs. 0:DIX20 (PYCL076W)	0.9973	0,3612 to 1,633	Yes	****	<0,0001
	0:PPGK1 vs. 0:PMFA1	0.3178	-0,3749 to 1,011	No	ns	>0,9999					DIX27 (PPGK1) vs. DIX25 (PFIG1)	6.328	6.666	-0.3378	0.09983	3	3	4.786	24		0:DIX27 (PPGK1) vs. 0:DIX21 (PIME4)	-0.5613	-1,254 to 0,1315	No	ns	0.4747					0:PPGK1 vs. 0:PMFA1	-0.05144	-0,2169 to 0,1140	No	ns	>0,9999					0:DIX27 (PPGK1) vs. 0:DIX21 (PIME4)	1.676	1,039 to 2,312	Yes	****	<0,0001
	0:PPGK1 vs. 0:PFIG1	0.6054	-0,08738 to 1,298	No	ns	0.261					DIX28 (PTDH3) vs. DIX17 (PMFA2)	7.262	7.639	-0.3766	0.09983	3	3	5.334	24		0:DIX27 (PPGK1) vs. 0:DIX22 (PHPF1)	0.1773	-0,5155 to 0,8700	No	ns	>0,9999					0:PPGK1 vs. 0:PFIG1	-0.1568	-0,3222 to 0,008718	No	ns	0.1066					0:DIX27 (PPGK1) vs. 0:DIX22 (PHPF1)	1.087	0,4505 to 1,723	Yes	****	<0,0001
	0:PPGK1 vs. 0:PAGA2	0.2595	-0,4333 to 0,9522	No	ns	>0,9999					DIX28 (PTDH3) vs. DIX18 (PMFA1)	7.262	6.424	0.8385	0.09983	3	3	11.88	24		0:DIX27 (PPGK1) vs. 0:DIX23 (PCSS1)	0.02827	-0,6645 to 0,7210	No	ns	>0,9999					0:PPGK1 vs. 0:PAGA2	-0.08172	-0,2472 to 0,08375	No	ns	>0,9999					0:DIX27 (PPGK1) vs. 0:DIX23 (PCSS1)	1.857	1,221 to 2,494	Yes	****	<0,0001
	0:PPGK1 vs. 0:PFUS1	0.06381	-0,6290 to 0,7566	No	ns	>0,9999					DIX28 (PTDH3) vs. DIX19 (PAGA2)	7.262	6.704	0.5584	0.09983	3	3	7.911	24		0:DIX27 (PPGK1) vs. 0:DIX24 (PFUS1)	-1.429	-2,121 to -0,7359	Yes	****	<0,0001					0:PPGK1 vs. 0:PFUS1	-0.1668	-0,3323 to -0,001317	Yes	*	0.0443					0:DIX27 (PPGK1) vs. 0:DIX24 (PFUS1)	0.2306	-0,4055 to 0,8667	No	ns	>0,9999
	0:PPGK1 vs. 0:PMFA2	-1.063	-1,755 to -0,3698	Yes	****	<0,0001					DIX28 (PTDH3) vs. DIX20 (PYCL076W)	7.262	6.224	1.038	0.09983	3	3	14.7	24		0:DIX27 (PPGK1) vs. 0:DIX25 (PFIG1)	-1.353	-2,046 to -0,6604	Yes	****	<0,0001					0:PPGK1 vs. 0:PMFA2	-0.04594	-0,2114 to 0,1195	No	ns	>0,9999					0:DIX27 (PPGK1) vs. 0:DIX25 (PFIG1)	0.7621	0,1260 to 1,398	Yes	**	0.0015
	0:PPGK1 vs. 10-4:PCSS1	1.827	1,046 to 2,607	Yes	****	<0,0001					DIX28 (PTDH3) vs. DIX21 (PIME4)	7.262	5.345	1.917	0.09983	3	3	27.16	24		0:DIX27 (PPGK1) vs. 0.0001:DIX17 (PMFA2)	-0.5427	-1,323 to 0,2378	No	ns	0.8722					0:PPGK1 vs. 10-4:PCSS1	-0.08887	-0,2753 to 0,09754	No	ns	>0,9999					0:DIX27 (PPGK1) vs. 0.0001:DIX17 (PMFA2)	-0.9586	-1,675 to -0,2419	Yes	****	<0,0001
	0:PPGK1 vs. 10-4:PIME4	1.612	0,8319 to 2,393	Yes	****	<0,0001					DIX28 (PTDH3) vs. DIX22 (PHPF1)	7.262	5.183	2.079	0.09983	3	3	29.45	24		0:DIX27 (PPGK1) vs. 0.0001:DIX18 (PMFA1)	-0.5574	-1,338 to 0,2231	No	ns	0.8222					0:PPGK1 vs. 10-4:PIME4	-0.1213	-0,3077 to 0,06512	No	ns	0.9526					0:DIX27 (PPGK1) vs. 0.0001:DIX18 (PMFA1)	0.4273	-0,2893 to 1,144	No	ns	0.9914
	0:PPGK1 vs. 10-4:PHPF1	1.146	0,3651 to 1,926	Yes	****	<0,0001					DIX28 (PTDH3) vs. DIX23 (PCSS1)	7.262	4.627	2.635	0.09983	3	3	37.33	24		0:DIX27 (PPGK1) vs. 0.0001:DIX19 (PAGA2)	-0.8546	-1,635 to -0,07413	Yes	*	0.0105					0:PPGK1 vs. 10-4:PHPF1	0.0008684	-0,1855 to 0,1873	No	ns	>0,9999					0:DIX27 (PPGK1) vs. 0.0001:DIX19 (PAGA2)	0.3993	-0,3174 to 1,116	No	ns	0.9984
	0:PPGK1 vs. 10-4:PYCL076W	0.9659	0,1854 to 1,746	Yes	***	0.0007					DIX28 (PTDH3) vs. DIX24 (PFUS1)	7.262	7.031	0.2313	0.09983	3	3	3.277	24		0:DIX27 (PPGK1) vs. 0.0001:DIX20 (PYCL076W)	-1.108	-1,889 to -0,3277	Yes	****	<0,0001					0:PPGK1 vs. 10-4:PYCL076W	-0.08952	-0,2759 to 0,09690	No	ns	>0,9999					0:DIX27 (PPGK1) vs. 0.0001:DIX20 (PYCL076W)	1.055	0,3387 to 1,772	Yes	****	<0,0001
	0:PPGK1 vs. 10-4:PMFA1	0.4003	-0,3802 to 1,181	No	ns	0.9999					DIX28 (PTDH3) vs. DIX25 (PFIG1)	7.262	6.666	0.5963	0.09983	3	3	8.447	24		0:DIX27 (PPGK1) vs. 0.0001:DIX21 (PIME4)	-0.4789	-1,259 to 0,3016	No	ns	0.9842					0:PPGK1 vs. 10-4:PMFA1	-0.02709	-0,2135 to 0,1593	No	ns	>0,9999					0:DIX27 (PPGK1) vs. 0.0001:DIX21 (PIME4)	1.734	1,017 to 2,450	Yes	****	<0,0001
	0:PPGK1 vs. 10-4:PFIG1	0.6878	-0,09266 to 1,468	No	ns	0.2407					DIX17 (PMFA2) vs. DIX18 (PMFA1)	7.639	6.424	1.215	0.09983	3	3	17.21	24		0:DIX27 (PPGK1) vs. 0.0001:DIX22 (PHPF1)	0.2597	-0,5208 to 1,040	No	ns	>0,9999					0:PPGK1 vs. 10-4:PFIG1	-0.1324	-0,3188 to 0,05402	No	ns	0.8334					0:DIX27 (PPGK1) vs. 0.0001:DIX22 (PHPF1)	1.145	0,4280 to 1,861	Yes	****	<0,0001
	0:PPGK1 vs. 10-4:PAGA2	0.3419	-0,4386 to 1,122	No	ns	>0,9999					DIX17 (PMFA2) vs. DIX19 (PAGA2)	7.639	6.704	0.935	0.09983	3	3	13.25	24		0:DIX27 (PPGK1) vs. 0.0001:DIX23 (PCSS1)	0.1107	-0,6698 to 0,8912	No	ns	>0,9999					0:PPGK1 vs. 10-4:PAGA2	-0.05737	-0,2438 to 0,1290	No	ns	>0,9999					0:DIX27 (PPGK1) vs. 0.0001:DIX23 (PCSS1)	1.916	1,199 to 2,632	Yes	****	<0,0001
	0:PPGK1 vs. 10-4:PFUS1	0.1462	-0,6342 to 0,9267	No	ns	>0,9999					DIX17 (PMFA2) vs. DIX20 (PYCL076W)	7.639	6.224	1.414	0.09983	3	3	20.03	24		0:DIX27 (PPGK1) vs. 0.0001:DIX24 (PFUS1)	-1.346	-2,127 to -0,5658	Yes	****	<0,0001					0:PPGK1 vs. 10-4:PFUS1	-0.1424	-0,3289 to 0,04398	No	ns	0.6523					0:DIX27 (PPGK1) vs. 0.0001:DIX24 (PFUS1)	0.2887	-0,4280 to 1,005	No	ns	>0,9999
	0:PPGK1 vs. 10-4:PMFA2	-0.9801	-1,761 to -0,1997	Yes	***	0.0005					DIX17 (PMFA2) vs. DIX21 (PIME4)	7.639	5.345	2.294	0.09983	3	3	32.49	24		0:DIX27 (PPGK1) vs. 0.0001:DIX25 (PFIG1)	-1.271	-2,051 to -0,4903	Yes	****	<0,0001					0:PPGK1 vs. 10-4:PMFA2	-0.02159	-0,2080 to 0,1648	No	ns	>0,9999					0:DIX27 (PPGK1) vs. 0.0001:DIX25 (PFIG1)	0.8202	0,1035 to 1,537	Yes	**	0.0042
	0:PPGK1 vs. 10-3:PCSS1	1.241	0,4609 to 2,022	Yes	****	<0,0001					DIX17 (PMFA2) vs. DIX22 (PHPF1)	7.639	5.183	2.456	0.09983	3	3	34.78	24		0:DIX27 (PPGK1) vs. 0.001:DIX17 (PMFA2)	-1.128	-1,908 to -0,3475	Yes	****	<0,0001					0:PPGK1 vs. 10-3:PCSS1	-0.2157	-0,4021 to -0,02928	Yes	**	0.0033					0:DIX27 (PPGK1) vs. 0.001:DIX17 (PMFA2)	-1.417	-2,134 to -0,7003	Yes	****	<0,0001
	0:PPGK1 vs. 10-3:PIME4	1.027	0,2466 to 1,808	Yes	***	0.0001					DIX17 (PMFA2) vs. DIX23 (PCSS1)	7.639	4.627	3.012	0.09983	3	3	42.66	24		0:DIX27 (PPGK1) vs. 0.001:DIX18 (PMFA1)	-1.143	-1,923 to -0,3622	Yes	****	<0,0001					0:PPGK1 vs. 10-3:PIME4	-0.2481	-0,4345 to -0,06171	Yes	****	<0,0001					0:DIX27 (PPGK1) vs. 0.001:DIX18 (PMFA1)	-0.03111	-0,7478 to 0,6856	No	ns	>0,9999
	0:PPGK1 vs. 10-3:PHPF1	0.5603	-0,2202 to 1,341	No	ns	0.8113					DIX17 (PMFA2) vs. DIX24 (PFUS1)	7.639	7.031	0.6079	0.09983	3	3	8.612	24		0:DIX27 (PPGK1) vs. 0.001:DIX19 (PAGA2)	-1.44	-2,220 to -0,6594	Yes	****	<0,0001					0:PPGK1 vs. 10-3:PHPF1	-0.126	-0,3124 to 0,06046	No	ns	0.9141					0:DIX27 (PPGK1) vs. 0.001:DIX19 (PAGA2)	-0.05917	-0,7759 to 0,6575	No	ns	>0,9999
	0:PPGK1 vs. 10-3:PYCL076W	0.3806	-0,3998 to 1,161	No	ns	>0,9999					DIX17 (PMFA2) vs. DIX25 (PFIG1)	7.639	6.666	0.9729	0.09983	3	3	13.78	24		0:DIX27 (PPGK1) vs. 0.001:DIX20 (PYCL076W)	-1.693	-2,474 to -0,9129	Yes	****	<0,0001					0:PPGK1 vs. 10-3:PYCL076W	-0.2163	-0,4028 to -0,02993	Yes	**	0.0031					0:DIX27 (PPGK1) vs. 0.001:DIX20 (PYCL076W)	0.597	-0,1197 to 1,314	No	ns	0.3913
	0:PPGK1 vs. 10-3:PMFA1	-0.185	-0,9655 to 0,5954	No	ns	>0,9999					DIX18 (PMFA1) vs. DIX19 (PAGA2)	6.424	6.704	-0.2801	0.09983	3	3	3.968	24		0:DIX27 (PPGK1) vs. 0.001:DIX21 (PIME4)	-1.064	-1,845 to -0,2837	Yes	****	<0,0001					0:PPGK1 vs. 10-3:PMFA1	-0.1539	-0,3403 to 0,03250	No	ns	0.4175					0:DIX27 (PPGK1) vs. 0.001:DIX21 (PIME4)	1.275	0,5585 to 1,992	Yes	****	<0,0001
	0:PPGK1 vs. 10-3:PFIG1	0.1025	-0,6779 to 0,8830	No	ns	>0,9999					DIX18 (PMFA1) vs. DIX20 (PYCL076W)	6.424	6.224	0.1991	0.09983	3	3	2.82	24		0:DIX27 (PPGK1) vs. 0.001:DIX22 (PHPF1)	-0.3256	-1,106 to 0,4549	No	ns	>0,9999					0:PPGK1 vs. 10-3:PFIG1	-0.2592	-0,4456 to -0,07281	Yes	****	<0,0001					0:DIX27 (PPGK1) vs. 0.001:DIX22 (PHPF1)	0.6862	-0,03045 to 1,403	No	ns	0.0927
	0:PPGK1 vs. 10-3:PAGA2	-0.2434	-1,024 to 0,5371	No	ns	>0,9999					DIX18 (PMFA1) vs. DIX21 (PIME4)	6.424	5.345	1.079	0.09983	3	3	15.28	24		0:DIX27 (PPGK1) vs. 0.001:DIX23 (PCSS1)	-0.4746	-1,255 to 0,3059	No	ns	0.9869					0:PPGK1 vs. 10-3:PAGA2	-0.1842	-0,3706 to 0,002218	No	ns	0.0598					0:DIX27 (PPGK1) vs. 0.001:DIX23 (PCSS1)	1.457	0,7404 to 2,174	Yes	****	<0,0001
	0:PPGK1 vs. 10-3:PFUS1	-0.439	-1,220 to 0,3414	No	ns	0.9979					DIX18 (PMFA1) vs. DIX22 (PHPF1)	6.424	5.183	1.24	0.09983	3	3	17.57	24		0:DIX27 (PPGK1) vs. 0.001:DIX24 (PFUS1)	-1.932	-2,712 to -1,151	Yes	****	<0,0001					0:PPGK1 vs. 10-3:PFUS1	-0.2693	-0,4557 to -0,08285	Yes	****	<0,0001					0:DIX27 (PPGK1) vs. 0.001:DIX24 (PFUS1)	-0.1698	-0,8865 to 0,5469	No	ns	>0,9999
	0:PPGK1 vs. 10-3:PMFA2	-1.565	-2,346 to -0,7849	Yes	****	<0,0001					DIX18 (PMFA1) vs. DIX23 (PCSS1)	6.424	4.627	1.797	0.09983	3	3	25.45	24		0:DIX27 (PPGK1) vs. 0.001:DIX25 (PFIG1)	-1.856	-2,637 to -1,076	Yes	****	<0,0001					0:PPGK1 vs. 10-3:PMFA2	-0.1484	-0,3348 to 0,03800	No	ns	0.5286					0:DIX27 (PPGK1) vs. 0.001:DIX25 (PFIG1)	0.3618	-0,3549 to 1,078	No	ns	>0,9999
	0:PPGK1 vs. 10-2:PCSS1	0.5536	-0,2268 to 1,334	No	ns	0.8358					DIX18 (PMFA1) vs. DIX24 (PFUS1)	6.424	7.031	-0.6072	0.09983	3	3	8.601	24		0:DIX27 (PPGK1) vs. 0.01:DIX17 (PMFA2)	-1.816	-2,596 to -1,035	Yes	****	<0,0001					0:PPGK1 vs. 10-2:PCSS1	-0.5227	-0,7092 to -0,3363	Yes	****	<0,0001					0:DIX27 (PPGK1) vs. 0.01:DIX17 (PMFA2)	-1.798	-2,514 to -1,081	Yes	****	<0,0001
	0:PPGK1 vs. 10-2:PIME4	0.3394	-0,4411 to 1,120	No	ns	>0,9999					DIX18 (PMFA1) vs. DIX25 (PFIG1)	6.424	6.666	-0.2422	0.09983	3	3	3.431	24		0:DIX27 (PPGK1) vs. 0.01:DIX18 (PMFA1)	-1.83	-2,611 to -1,050	Yes	****	<0,0001					0:PPGK1 vs. 10-2:PIME4	-0.5552	-0,7416 to -0,3687	Yes	****	<0,0001					0:DIX27 (PPGK1) vs. 0.01:DIX18 (PMFA1)	-0.4118	-1,128 to 0,3049	No	ns	0.9964
	0:PPGK1 vs. 10-2:PHPF1	-0.1275	-0,9079 to 0,6530	No	ns	>0,9999					DIX19 (PAGA2) vs. DIX20 (PYCL076W)	6.704	6.224	0.4792	0.09983	3	3	6.788	24		0:DIX27 (PPGK1) vs. 0.01:DIX19 (PAGA2)	-2.128	-2,908 to -1,347	Yes	****	<0,0001					0:PPGK1 vs. 10-2:PHPF1	-0.433	-0,6194 to -0,2466	Yes	****	<0,0001					0:DIX27 (PPGK1) vs. 0.01:DIX19 (PAGA2)	-0.4399	-1,157 to 0,2768	No	ns	0.9841
	0:PPGK1 vs. 10-2:PYCL076W	-0.3071	-1,088 to 0,4734	No	ns	>0,9999					DIX19 (PAGA2) vs. DIX21 (PIME4)	6.704	5.345	1.359	0.09983	3	3	19.25	24		0:DIX27 (PPGK1) vs. 0.01:DIX20 (PYCL076W)	-2.381	-3,162 to -1,601	Yes	****	<0,0001					0:PPGK1 vs. 10-2:PYCL076W	-0.5234	-0,7098 to -0,3370	Yes	****	<0,0001					0:DIX27 (PPGK1) vs. 0.01:DIX20 (PYCL076W)	0.2163	-0,5004 to 0,9329	No	ns	>0,9999
	0:PPGK1 vs. 10-2:PMFA1	-0.8728	-1,653 to -0,09229	Yes	**	0.0069					DIX19 (PAGA2) vs. DIX22 (PHPF1)	6.704	5.183	1.521	0.09983	3	3	21.54	24		0:DIX27 (PPGK1) vs. 0.01:DIX21 (PIME4)	-1.752	-2,532 to -0,9714	Yes	****	<0,0001					0:PPGK1 vs. 10-2:PMFA1	-0.4609	-0,6474 to -0,2745	Yes	****	<0,0001					0:DIX27 (PPGK1) vs. 0.01:DIX21 (PIME4)	0.8945	0,1778 to 1,611	Yes	***	0.0005
	0:PPGK1 vs. 10-2:PFIG1	-0.5852	-1,366 to 0,1953	No	ns	0.7051					DIX19 (PAGA2) vs. DIX23 (PCSS1)	6.704	4.627	2.077	0.09983	3	3	29.42	24		0:DIX27 (PPGK1) vs. 0.01:DIX22 (PHPF1)	-1.013	-1,794 to -0,2329	Yes	***	0.0002					0:PPGK1 vs. 10-2:PFIG1	-0.5663	-0,7527 to -0,3798	Yes	****	<0,0001					0:DIX27 (PPGK1) vs. 0.01:DIX22 (PHPF1)	0.3055	-0,4112 to 1,022	No	ns	>0,9999
	0:PPGK1 vs. 10-2:PAGA2	-0.9311	-1,712 to -0,1506	Yes	**	0.0017					DIX19 (PAGA2) vs. DIX24 (PFUS1)	6.704	7.031	-0.3271	0.09983	3	3	4.634	24		0:DIX27 (PPGK1) vs. 0.01:DIX23 (PCSS1)	-1.162	-1,943 to -0,3818	Yes	****	<0,0001					0:PPGK1 vs. 10-2:PAGA2	-0.4912	-0,6777 to -0,3048	Yes	****	<0,0001					0:DIX27 (PPGK1) vs. 0.01:DIX23 (PCSS1)	1.076	0,3597 to 1,793	Yes	****	<0,0001
	0:PPGK1 vs. 10-2:PFUS1	-1.127	-1,907 to -0,3463	Yes	****	<0,0001					DIX19 (PAGA2) vs. DIX25 (PFIG1)	6.704	6.666	0.03784	0.09983	3	3	0.5361	24		0:DIX27 (PPGK1) vs. 0.01:DIX24 (PFUS1)	-2.619	-3,400 to -1,839	Yes	****	<0,0001					0:PPGK1 vs. 10-2:PFUS1	-0.5763	-0,7627 to -0,3899	Yes	****	<0,0001					0:DIX27 (PPGK1) vs. 0.01:DIX24 (PFUS1)	-0.5505	-1,267 to 0,1662	No	ns	0.6369
	0:PPGK1 vs. 10-2:PMFA2	-2.253	-3,034 to -1,473	Yes	****	<0,0001					DIX20 (PYCL076W) vs. DIX21 (PIME4)	6.224	5.345	0.8796	0.09983	3	3	12.46	24		0:DIX27 (PPGK1) vs. 0.01:DIX25 (PFIG1)	-2.544	-3,324 to -1,763	Yes	****	<0,0001					0:PPGK1 vs. 10-2:PMFA2	-0.4555	-0,6419 to -0,2690	Yes	****	<0,0001					0:DIX27 (PPGK1) vs. 0.01:DIX25 (PFIG1)	-0.01894	-0,7356 to 0,6977	No	ns	>0,9999
	0:PPGK1 vs. 10-1:Neg.Con.	1.01	0,09856 to 1,921	Yes	**	0.0083					DIX20 (PYCL076W) vs. DIX22 (PHPF1)	6.224	5.183	1.041	0.09983	3	3	14.75	24		0:DIX27 (PPGK1) vs. 0.1:DIX14 (Neg.Con.)	-1.324	-2,236 to -0,4128	Yes	****	<0,0001					0:PPGK1 vs. 10-1:Neg.Con.	-0.563	-0,7807 to -0,3453	Yes	****	<0,0001					0:DIX27 (PPGK1) vs. 0.1:DIX14 (Neg.Con.)	1.573	0,7361 to 2,410	Yes	****	<0,0001
	0:PPGK1 vs. 10-1:PPGK1	-1.317	-1,725 to -0,9097	Yes	****	<0,0001					DIX20 (PYCL076W) vs. DIX23 (PCSS1)	6.224	4.627	1.598	0.09983	3	3	22.63	24		0:DIX27 (PPGK1) vs. 0.1:DIX27 (PPGK1)	-1.317	-1,725 to -0,9097	Yes	****	<0,0001					0:PPGK1 vs. 10-1:PPGK1	-0.5341	-0,6314 to -0,4367	Yes	****	<0,0001					0:DIX27 (PPGK1) vs. 0.1:DIX27 (PPGK1)	-0.7832	-1,158 to -0,4090	Yes	****	<0,0001
	0:PPGK1 vs. 10-1:PTDH3	-2.262	-3,173 to -1,350	Yes	****	<0,0001					DIX20 (PYCL076W) vs. DIX24 (PFUS1)	6.224	7.031	-0.8063	0.09983	3	3	11.42	24		0:DIX27 (PPGK1) vs. 0.1:DIX28 (PTDH3)	-1.342	-2,254 to -0,4307	Yes	****	<0,0001					0:PPGK1 vs. 10-1:PTDH3	-0.5629	-0,7806 to -0,3453	Yes	****	<0,0001					0:DIX27 (PPGK1) vs. 0.1:DIX28 (PTDH3)	-1.699	-2,536 to -0,8618	Yes	****	<0,0001
	0:PPGK1 vs. 10-1:PCSS1	0.4269	-0,3769 to 1,231	No	ns	0.9996					DIX20 (PYCL076W) vs. DIX25 (PFIG1)	6.224	6.666	-0.4413	0.09983	3	3	6.252	24		0:DIX27 (PPGK1) vs. 0.1:DIX17 (PMFA2)	-1.942	-2,746 to -1,139	Yes	****	<0,0001					0:PPGK1 vs. 10-1:PCSS1	-0.6473	-0,8393 to -0,4553	Yes	****	<0,0001					0:DIX27 (PPGK1) vs. 0.1:DIX17 (PMFA2)	-1.8	-2,538 to -1,062	Yes	****	<0,0001
	0:PPGK1 vs. 10-1:PIME4	0.2127	-0,5911 to 1,016	No	ns	>0,9999					DIX21 (PIME4) vs. DIX22 (PHPF1)	5.345	5.183	0.1618	0.09983	3	3	2.292	24		0:DIX27 (PPGK1) vs. 0.1:DIX18 (PMFA1)	-1.957	-2,761 to -1,153	Yes	****	<0,0001					0:PPGK1 vs. 10-1:PIME4	-0.6797	-0,8717 to -0,4877	Yes	****	<0,0001					0:DIX27 (PPGK1) vs. 0.1:DIX18 (PMFA1)	-0.414	-1,152 to 0,3241	No	ns	0.9981
	0:PPGK1 vs. 10-1:PHPF1	-0.2542	-1,058 to 0,5496	No	ns	>0,9999					DIX21 (PIME4) vs. DIX23 (PCSS1)	5.345	4.627	0.7181	0.09983	3	3	10.17	24		0:DIX27 (PPGK1) vs. 0.1:DIX19 (PAGA2)	-2.254	-3,058 to -1,451	Yes	****	<0,0001					0:PPGK1 vs. 10-1:PHPF1	-0.5575	-0,7495 to -0,3656	Yes	****	<0,0001					0:DIX27 (PPGK1) vs. 0.1:DIX19 (PAGA2)	-0.442	-1,180 to 0,2960	No	ns	0.9906
	0:PPGK1 vs. 10-1:PYCL076W	-0.4338	-1,238 to 0,3700	No	ns	0.9993					DIX21 (PIME4) vs. DIX24 (PFUS1)	5.345	7.031	-1.686	0.09983	3	3	23.88	24		0:DIX27 (PPGK1) vs. 0.1:DIX20 (PYCL076W)	-2.508	-3,312 to -1,704	Yes	****	<0,0001					0:PPGK1 vs. 10-1:PYCL076W	-0.6479	-0,8399 to -0,4559	Yes	****	<0,0001					0:DIX27 (PPGK1) vs. 0.1:DIX20 (PYCL076W)	0.2141	-0,5240 to 0,9522	No	ns	>0,9999
	0:PPGK1 vs. 10-1:PMFA1	-0.9995	-1,803 to -0,1957	Yes	***	0.0006					DIX21 (PIME4) vs. DIX25 (PFIG1)	5.345	6.666	-1.321	0.09983	3	3	18.71	24		0:DIX27 (PPGK1) vs. 0.1:DIX21 (PIME4)	-1.879	-2,682 to -1,075	Yes	****	<0,0001					0:PPGK1 vs. 10-1:PMFA1	-0.5855	-0,7775 to -0,3935	Yes	****	<0,0001					0:DIX27 (PPGK1) vs. 0.1:DIX21 (PIME4)	0.8924	0,1543 to 1,630	Yes	**	0.0012
	0:PPGK1 vs. 10-1:PFIG1	-0.7119	-1,516 to 0,09188	No	ns	0.2292					DIX22 (PHPF1) vs. DIX23 (PCSS1)	5.183	4.627	0.5563	0.09983	3	3	7.88	24		0:DIX27 (PPGK1) vs. 0.1:DIX22 (PHPF1)	-1.14	-1,944 to -0,3363	Yes	****	<0,0001					0:PPGK1 vs. 10-1:PFIG1	-0.6908	-0,8828 to -0,4988	Yes	****	<0,0001					0:DIX27 (PPGK1) vs. 0.1:DIX22 (PHPF1)	0.3034	-0,4347 to 1,041	No	ns	>0,9999
	0:PPGK1 vs. 10-1:PAGA2	-1.058	-1,862 to -0,2540	Yes	***	0.0001					DIX22 (PHPF1) vs. DIX24 (PFUS1)	5.183	7.031	-1.848	0.09983	3	3	26.17	24		0:DIX27 (PPGK1) vs. 0.1:DIX23 (PCSS1)	-1.289	-2,093 to -0,4852	Yes	****	<0,0001					0:PPGK1 vs. 10-1:PAGA2	-0.6158	-0,8078 to -0,4238	Yes	****	<0,0001					0:DIX27 (PPGK1) vs. 0.1:DIX23 (PCSS1)	1.074	0,3361 to 1,812	Yes	****	<0,0001
	0:PPGK1 vs. 10-1:PFUS1	-1.253	-2,057 to -0,4497	Yes	****	<0,0001					DIX22 (PHPF1) vs. DIX25 (PFIG1)	5.183	6.666	-1.483	0.09983	3	3	21	24		0:DIX27 (PPGK1) vs. 0.1:DIX24 (PFUS1)	-2.746	-3,550 to -1,942	Yes	****	<0,0001					0:PPGK1 vs. 10-1:PFUS1	-0.7008	-0,8928 to -0,5089	Yes	****	<0,0001					0:DIX27 (PPGK1) vs. 0.1:DIX24 (PFUS1)	-0.5526	-1,291 to 0,1854	No	ns	0.7089
	0:PPGK1 vs. 10-1:PMFA2	-2.38	-3,184 to -1,576	Yes	****	<0,0001					DIX23 (PCSS1) vs. DIX24 (PFUS1)	4.627	7.031	-2.404	0.09983	3	3	34.05	24		0:DIX27 (PPGK1) vs. 0.1:DIX25 (PFIG1)	-2.671	-3,474 to -1,867	Yes	****	<0,0001					0:PPGK1 vs. 10-1:PMFA2	-0.58	-0,7720 to -0,3880	Yes	****	<0,0001					0:DIX27 (PPGK1) vs. 0.1:DIX25 (PFIG1)	-0.02109	-0,7592 to 0,7170	No	ns	>0,9999
	0:PPGK1 vs. 100:PCSS1	0.264	-0,5165 to 1,044	No	ns	>0,9999					DIX23 (PCSS1) vs. DIX25 (PFIG1)	4.627	6.666	-2.039	0.09983	3	3	28.88	24		0:DIX27 (PPGK1) vs. 1:DIX17 (PMFA2)	-2.105	-2,886 to -1,325	Yes	****	<0,0001					0:PPGK1 vs. 100:PCSS1	-0.6901	-0,8766 to -0,5037	Yes	****	<0,0001					0:DIX27 (PPGK1) vs. 1:DIX17 (PMFA2)	-1.92	-2,637 to -1,203	Yes	****	<0,0001
	0:PPGK1 vs. 100:PIME4	0.04968	-0,7308 to 0,8302	No	ns	>0,9999					DIX24 (PFUS1) vs. DIX25 (PFIG1)	7.031	6.666	0.3649	0.09983	3	3	5.17	24		0:DIX27 (PPGK1) vs. 1:DIX18 (PMFA1)	-2.12	-2,901 to -1,340	Yes	****	<0,0001					0:PPGK1 vs. 100:PIME4	-0.7226	-0,9090 to -0,5361	Yes	****	<0,0001					0:DIX27 (PPGK1) vs. 1:DIX18 (PMFA1)	-0.5341	-1,251 to 0,1826	No	ns	0.7214
	0:PPGK1 vs. 100:PHPF1	-0.4171	-1,198 to 0,3633	No	ns	0.9995															0:DIX27 (PPGK1) vs. 1:DIX19 (PAGA2)	-2.417	-3,198 to -1,637	Yes	****	<0,0001					0:PPGK1 vs. 100:PHPF1	-0.6004	-0,7868 to -0,4140	Yes	****	<0,0001					0:DIX27 (PPGK1) vs. 1:DIX19 (PAGA2)	-0.5622	-1,279 to 0,1545	No	ns	0.5742
	0:PPGK1 vs. 100:PYCL076W	-0.5968	-1,377 to 0,1837	No	ns	0.6501															0:DIX27 (PPGK1) vs. 1:DIX20 (PYCL076W)	-2.671	-3,451 to -1,890	Yes	****	<0,0001					0:PPGK1 vs. 100:PYCL076W	-0.6908	-0,8772 to -0,5044	Yes	****	<0,0001					0:DIX27 (PPGK1) vs. 1:DIX20 (PYCL076W)	0.09399	-0,6227 to 0,8107	No	ns	>0,9999
	0:PPGK1 vs. 100:PMFA1	-1.162	-1,943 to -0,3820	Yes	****	<0,0001															0:DIX27 (PPGK1) vs. 1:DIX21 (PIME4)	-2.042	-2,822 to -1,261	Yes	****	<0,0001					0:PPGK1 vs. 100:PMFA1	-0.6283	-0,8148 to -0,4419	Yes	****	<0,0001					0:DIX27 (PPGK1) vs. 1:DIX21 (PIME4)	0.7722	0,05556 to 1,489	Yes	*	0.0142
	0:PPGK1 vs. 100:PFIG1	-0.8749	-1,655 to -0,09440	Yes	**	0.0066															0:DIX27 (PPGK1) vs. 1:DIX22 (PHPF1)	-1.303	-2,083 to -0,5225	Yes	****	<0,0001					0:PPGK1 vs. 100:PFIG1	-0.7337	-0,9201 to -0,5472	Yes	****	<0,0001					0:DIX27 (PPGK1) vs. 1:DIX22 (PHPF1)	0.1832	-0,5334 to 0,8999	No	ns	>0,9999
	0:PPGK1 vs. 100:PAGA2	-1.221	-2,001 to -0,4403	Yes	****	<0,0001															0:DIX27 (PPGK1) vs. 1:DIX23 (PCSS1)	-1.452	-2,232 to -0,6715	Yes	****	<0,0001					0:PPGK1 vs. 100:PAGA2	-0.6586	-0,8451 to -0,4722	Yes	****	<0,0001					0:DIX27 (PPGK1) vs. 1:DIX23 (PCSS1)	0.9541	0,2374 to 1,671	Yes	****	<0,0001
	0:PPGK1 vs. 100:PFUS1	-1.416	-2,197 to -0,6360	Yes	****	<0,0001															0:DIX27 (PPGK1) vs. 1:DIX24 (PFUS1)	-2.909	-3,689 to -2,129	Yes	****	<0,0001					0:PPGK1 vs. 100:PFUS1	-0.7437	-0,9301 to -0,5573	Yes	****	<0,0001					0:DIX27 (PPGK1) vs. 1:DIX24 (PFUS1)	-0.6728	-1,389 to 0,04391	No	ns	0.1196
	0:PPGK1 vs. 100:PMFA2	-2.543	-3,323 to -1,762	Yes	****	<0,0001															0:DIX27 (PPGK1) vs. 1:DIX25 (PFIG1)	-2.833	-3,614 to -2,053	Yes	****	<0,0001					0:PPGK1 vs. 100:PMFA2	-0.6229	-0,8093 to -0,4364	Yes	****	<0,0001					0:DIX27 (PPGK1) vs. 1:DIX25 (PFIG1)	-0.1412	-0,8579 to 0,5755	No	ns	>0,9999
	0:PPGK1 vs. 101:PCSS1	0.3245	-0,4560 to 1,105	No	ns	>0,9999															0:DIX27 (PPGK1) vs. 10:DIX17 (PMFA2)	-2.045	-2,825 to -1,264	Yes	****	<0,0001					0:PPGK1 vs. 101:PCSS1	-0.6159	-0,8023 to -0,4295	Yes	****	<0,0001					0:DIX27 (PPGK1) vs. 10:DIX17 (PMFA2)	-1.934	-2,650 to -1,217	Yes	****	<0,0001
	0:PPGK1 vs. 101:PIME4	0.1102	-0,6703 to 0,8907	No	ns	>0,9999															0:DIX27 (PPGK1) vs. 10:DIX18 (PMFA1)	-2.06	-2,840 to -1,279	Yes	****	<0,0001					0:PPGK1 vs. 101:PIME4	-0.6483	-0,8347 to -0,4619	Yes	****	<0,0001					0:DIX27 (PPGK1) vs. 10:DIX18 (PMFA1)	-0.5479	-1,265 to 0,1688	No	ns	0.6509
	0:PPGK1 vs. 101:PHPF1	-0.3566	-1,137 to 0,4238	No	ns	>0,9999															0:DIX27 (PPGK1) vs. 10:DIX19 (PAGA2)	-2.357	-3,137 to -1,576	Yes	****	<0,0001					0:PPGK1 vs. 101:PHPF1	-0.5261	-0,7126 to -0,3397	Yes	****	<0,0001					0:DIX27 (PPGK1) vs. 10:DIX19 (PAGA2)	-0.5759	-1,293 to 0,1408	No	ns	0.4999
	0:PPGK1 vs. 101:PYCL076W	-0.5363	-1,317 to 0,2442	No	ns	0.891															0:DIX27 (PPGK1) vs. 10:DIX20 (PYCL076W)	-2.61	-3,391 to -1,830	Yes	****	<0,0001					0:PPGK1 vs. 101:PYCL076W	-0.6165	-0,8029 to -0,4301	Yes	****	<0,0001					0:DIX27 (PPGK1) vs. 10:DIX20 (PYCL076W)	0.08023	-0,6365 to 0,7969	No	ns	>0,9999
	0:PPGK1 vs. 101:PMFA1	-1.102	-1,882 to -0,3215	Yes	****	<0,0001															0:DIX27 (PPGK1) vs. 10:DIX21 (PIME4)	-1.981	-2,762 to -1,201	Yes	****	<0,0001					0:PPGK1 vs. 101:PMFA1	-0.5541	-0,7405 to -0,3677	Yes	****	<0,0001					0:DIX27 (PPGK1) vs. 10:DIX21 (PIME4)	0.7585	0,04180 to 1,475	Yes	*	0.0197
	0:PPGK1 vs. 101:PFIG1	-0.8144	-1,595 to -0,03390	Yes	*	0.0252															0:DIX27 (PPGK1) vs. 10:DIX22 (PHPF1)	-1.243	-2,023 to -0,4620	Yes	****	<0,0001					0:PPGK1 vs. 101:PFIG1	-0.6594	-0,8458 to -0,4730	Yes	****	<0,0001					0:DIX27 (PPGK1) vs. 10:DIX22 (PHPF1)	0.1695	-0,5472 to 0,8862	No	ns	>0,9999
	0:PPGK1 vs. 101:PAGA2	-1.16	-1,941 to -0,3798	Yes	****	<0,0001															0:DIX27 (PPGK1) vs. 10:DIX23 (PCSS1)	-1.391	-2,172 to -0,6110	Yes	****	<0,0001					0:PPGK1 vs. 101:PAGA2	-0.5844	-0,7708 to -0,3980	Yes	****	<0,0001					0:DIX27 (PPGK1) vs. 10:DIX23 (PCSS1)	0.9403	0,2236 to 1,657	Yes	***	0.0001
	0:PPGK1 vs. 101:PFUS1	-1.356	-2,136 to -0,5755	Yes	****	<0,0001															0:DIX27 (PPGK1) vs. 10:DIX24 (PFUS1)	-2.848	-3,629 to -2,068	Yes	****	<0,0001					0:PPGK1 vs. 101:PFUS1	-0.6694	-0,8559 to -0,4830	Yes	****	<0,0001					0:DIX27 (PPGK1) vs. 10:DIX24 (PFUS1)	-0.6865	-1,403 to 0,03016	No	ns	0.0922
	0:PPGK1 vs. 101:PMFA2	-2.482	-3,263 to -1,702	Yes	****	<0,0001															0:DIX27 (PPGK1) vs. 10:DIX25 (PFIG1)	-2.773	-3,553 to -1,993	Yes	****	<0,0001					0:PPGK1 vs. 101:PMFA2	-0.5486	-0,7350 to -0,3622	Yes	****	<0,0001					0:DIX27 (PPGK1) vs. 10:DIX25 (PFIG1)	-0.155	-0,8717 to 0,5617	No	ns	>0,9999
	0:PPGK1 vs. 102:Neg.Con.	0.972	0,06064 to 1,883	Yes	*	0.0171															0:DIX27 (PPGK1) vs. 100:DIX14 (Neg.Con.)	-1.362	-2,274 to -0,4507	Yes	****	<0,0001					0:PPGK1 vs. 102:Neg.Con.	-0.5499	-0,7676 to -0,3322	Yes	****	<0,0001					0:DIX27 (PPGK1) vs. 100:DIX14 (Neg.Con.)	1.522	0,6851 to 2,359	Yes	****	<0,0001
	0:PPGK1 vs. 102:PPGK1	-1.355	-1,763 to -0,9476	Yes	****	<0,0001															0:DIX27 (PPGK1) vs. 100:DIX27 (PPGK1)	-1.355	-1,763 to -0,9476	Yes	****	<0,0001					0:PPGK1 vs. 102:PPGK1	-0.521	-0,6183 to -0,4236	Yes	****	<0,0001					0:DIX27 (PPGK1) vs. 100:DIX27 (PPGK1)	-0.8342	-1,208 to -0,4600	Yes	****	<0,0001
	0:PPGK1 vs. 102:PTDH3	-2.3	-3,211 to -1,388	Yes	****	<0,0001															0:DIX27 (PPGK1) vs. 100:DIX28 (PTDH3)	-1.38	-2,291 to -0,4687	Yes	****	<0,0001					0:PPGK1 vs. 102:PTDH3	-0.5499	-0,7676 to -0,3322	Yes	****	<0,0001					0:DIX27 (PPGK1) vs. 100:DIX28 (PTDH3)	-1.75	-2,587 to -0,9128	Yes	****	<0,0001
	0:PPGK1 vs. 102:PCSS1	0.389	-0,4148 to 1,193	No	ns	>0,9999															0:DIX27 (PPGK1) vs. 100:DIX17 (PMFA2)	-1.98	-2,784 to -1,177	Yes	****	<0,0001					0:PPGK1 vs. 102:PCSS1	-0.6342	-0,8262 to -0,4422	Yes	****	<0,0001					0:DIX27 (PPGK1) vs. 100:DIX17 (PMFA2)	-1.851	-2,589 to -1,113	Yes	****	<0,0001
	0:PPGK1 vs. 102:PIME4	0.1747	-0,6290 to 0,9785	No	ns	>0,9999															0:DIX27 (PPGK1) vs. 100:DIX18 (PMFA1)	-1.995	-2,799 to -1,191	Yes	****	<0,0001					0:PPGK1 vs. 102:PIME4	-0.6666	-0,8586 to -0,4747	Yes	****	<0,0001					0:DIX27 (PPGK1) vs. 100:DIX18 (PMFA1)	-0.465	-1,203 to 0,2731	No	ns	0.9734
	0:PPGK1 vs. 102:PHPF1	-0.2921	-1,096 to 0,5117	No	ns	>0,9999															0:DIX27 (PPGK1) vs. 100:DIX19 (PAGA2)	-2.292	-3,096 to -1,488	Yes	****	<0,0001					0:PPGK1 vs. 102:PHPF1	-0.5445	-0,7365 to -0,3525	Yes	****	<0,0001					0:DIX27 (PPGK1) vs. 100:DIX19 (PAGA2)	-0.493	-1,231 to 0,2451	No	ns	0.9277
	0:PPGK1 vs. 102:PYCL076W	-0.4717	-1,276 to 0,3320	No	ns	0.994															0:DIX27 (PPGK1) vs. 100:DIX20 (PYCL076W)	-2.546	-3,350 to -1,742	Yes	****	<0,0001					0:PPGK1 vs. 102:PYCL076W	-0.6349	-0,8268 to -0,4429	Yes	****	<0,0001					0:DIX27 (PPGK1) vs. 100:DIX20 (PYCL076W)	0.1631	-0,5750 to 0,9012	No	ns	>0,9999
	0:PPGK1 vs. 102:PMFA1	-1.037	-1,841 to -0,2336	Yes	***	0.0002															0:DIX27 (PPGK1) vs. 100:DIX21 (PIME4)	-1.916	-2,720 to -1,113	Yes	****	<0,0001					0:PPGK1 vs. 102:PMFA1	-0.5724	-0,7644 to -0,3804	Yes	****	<0,0001					0:DIX27 (PPGK1) vs. 100:DIX21 (PIME4)	0.8414	0,1033 to 1,579	Yes	**	0.0046
	0:PPGK1 vs. 102:PFIG1	-0.7498	-1,554 to 0,05396	No	ns	0.1292															0:DIX27 (PPGK1) vs. 100:DIX22 (PHPF1)	-1.178	-1,982 to -0,3742	Yes	****	<0,0001					0:PPGK1 vs. 102:PFIG1	-0.6777	-0,8697 to -0,4858	Yes	****	<0,0001					0:DIX27 (PPGK1) vs. 100:DIX22 (PHPF1)	0.2524	-0,4857 to 0,9905	No	ns	>0,9999
	0:PPGK1 vs. 102:PAGA2	-1.096	-1,900 to -0,2920	Yes	****	<0,0001															0:DIX27 (PPGK1) vs. 100:DIX23 (PCSS1)	-1.327	-2,131 to -0,5232	Yes	****	<0,0001					0:PPGK1 vs. 102:PAGA2	-0.6027	-0,7947 to -0,4107	Yes	****	<0,0001					0:DIX27 (PPGK1) vs. 100:DIX23 (PCSS1)	1.023	0,2851 to 1,761	Yes	****	<0,0001
	0:PPGK1 vs. 102:PFUS1	-1.291	-2,095 to -0,4876	Yes	****	<0,0001															0:DIX27 (PPGK1) vs. 100:DIX24 (PFUS1)	-2.784	-3,588 to -1,980	Yes	****	<0,0001					0:PPGK1 vs. 102:PFUS1	-0.6878	-0,8798 to -0,4958	Yes	****	<0,0001					0:DIX27 (PPGK1) vs. 100:DIX24 (PFUS1)	-0.6036	-1,342 to 0,1344	No	ns	0.4461
	0:PPGK1 vs. 102:PMFA2	-2.418	-3,222 to -1,614	Yes	****	<0,0001															0:DIX27 (PPGK1) vs. 100:DIX25 (PFIG1)	-2.708	-3,512 to -1,905	Yes	****	<0,0001					0:PPGK1 vs. 102:PMFA2	-0.5669	-0,7589 to -0,3749	Yes	****	<0,0001					0:DIX27 (PPGK1) vs. 100:DIX25 (PFIG1)	-0.07208	-0,8102 to 0,6660	No	ns	>0,9999
	0:PTDH3 vs. 0:PCSS1	2.689	1,996 to 3,381	Yes	****	<0,0001															0:DIX28 (PTDH3) vs. 0:DIX17 (PMFA2)	-0.6003	-1,293 to 0,09251	No	ns	0.2823					0:PTDH3 vs. 0:PCSS1	-0.08433	-0,2498 to 0,08114	No	ns	0.9999					0:DIX28 (PTDH3) vs. 0:DIX17 (PMFA2)	-0.1012	-0,7373 to 0,5350	No	ns	>0,9999
	0:PTDH3 vs. 0:PIME4	2.474	1,782 to 3,167	Yes	****	<0,0001															0:DIX28 (PTDH3) vs. 0:DIX18 (PMFA1)	-0.615	-1,308 to 0,07780	No	ns	0.224					0:PTDH3 vs. 0:PIME4	-0.1168	-0,2822 to 0,04871	No	ns	0.846					0:DIX28 (PTDH3) vs. 0:DIX18 (PMFA1)	1.285	0,6486 to 1,921	Yes	****	<0,0001
	0:PTDH3 vs. 0:PHPF1	2.007	1,315 to 2,700	Yes	****	<0,0001															0:DIX28 (PTDH3) vs. 0:DIX19 (PAGA2)	-0.9122	-1,605 to -0,2194	Yes	***	0.0001					0:PTDH3 vs. 0:PHPF1	0.005412	-0,1601 to 0,1709	No	ns	>0,9999					0:DIX28 (PTDH3) vs. 0:DIX19 (PAGA2)	1.257	0,6205 to 1,893	Yes	****	<0,0001
	0:PTDH3 vs. 0:PYCL076W	1.828	1,135 to 2,521	Yes	****	<0,0001															0:DIX28 (PTDH3) vs. 0:DIX20 (PYCL076W)	-1.166	-1,858 to -0,4729	Yes	****	<0,0001					0:PTDH3 vs. 0:PYCL076W	-0.08497	-0,2504 to 0,08050	No	ns	0.9999					0:DIX28 (PTDH3) vs. 0:DIX20 (PYCL076W)	1.913	1,277 to 2,549	Yes	****	<0,0001
	0:PTDH3 vs. 0:PMFA1	1.262	0,5694 to 1,955	Yes	****	<0,0001															0:DIX28 (PTDH3) vs. 0:DIX21 (PIME4)	-0.5364	-1,229 to 0,1563	No	ns	0.613					0:PTDH3 vs. 0:PMFA1	-0.02254	-0,1880 to 0,1429	No	ns	>0,9999					0:DIX28 (PTDH3) vs. 0:DIX21 (PIME4)	2.591	1,955 to 3,227	Yes	****	<0,0001
	0:PTDH3 vs. 0:PFIG1	1.55	0,8570 to 2,243	Yes	****	<0,0001															0:DIX28 (PTDH3) vs. 0:DIX22 (PHPF1)	0.2021	-0,4907 to 0,8949	No	ns	>0,9999					0:PTDH3 vs. 0:PFIG1	-0.1279	-0,2933 to 0,03761	No	ns	0.6194					0:DIX28 (PTDH3) vs. 0:DIX22 (PHPF1)	2.002	1,366 to 2,638	Yes	****	<0,0001
	0:PTDH3 vs. 0:PAGA2	1.204	0,5111 to 1,897	Yes	****	<0,0001															0:DIX28 (PTDH3) vs. 0:DIX23 (PCSS1)	0.05312	-0,6397 to 0,7459	No	ns	>0,9999					0:PTDH3 vs. 0:PAGA2	-0.05283	-0,2183 to 0,1126	No	ns	>0,9999					0:DIX28 (PTDH3) vs. 0:DIX23 (PCSS1)	2.773	2,137 to 3,409	Yes	****	<0,0001
	0:PTDH3 vs. 0:PFUS1	1.008	0,3154 to 1,701	Yes	****	<0,0001															0:DIX28 (PTDH3) vs. 0:DIX24 (PFUS1)	-1.404	-2,097 to -0,7111	Yes	****	<0,0001					0:PTDH3 vs. 0:PFUS1	-0.1379	-0,3034 to 0,02758	No	ns	0.39					0:DIX28 (PTDH3) vs. 0:DIX24 (PFUS1)	1.146	0,5099 to 1,782	Yes	****	<0,0001
	0:PTDH3 vs. 0:PMFA2	-0.1182	-0,8110 to 0,5746	No	ns	>0,9999															0:DIX28 (PTDH3) vs. 0:DIX25 (PFIG1)	-1.328	-2,021 to -0,6356	Yes	****	<0,0001					0:PTDH3 vs. 0:PMFA2	-0.01705	-0,1825 to 0,1484	No	ns	>0,9999					0:DIX28 (PTDH3) vs. 0:DIX25 (PFIG1)	1.678	1,041 to 2,314	Yes	****	<0,0001
	0:PTDH3 vs. 10-4:PCSS1	2.771	1,991 to 3,551	Yes	****	<0,0001															0:DIX28 (PTDH3) vs. 0.0001:DIX17 (PMFA2)	-0.5178	-1,298 to 0,2626	No	ns	0.9349					0:PTDH3 vs. 10-4:PCSS1	-0.05998	-0,2464 to 0,1264	No	ns	>0,9999					0:DIX28 (PTDH3) vs. 0.0001:DIX17 (PMFA2)	-0.04309	-0,7598 to 0,6736	No	ns	>0,9999
	0:PTDH3 vs. 10-4:PIME4	2.557	1,776 to 3,337	Yes	****	<0,0001															0:DIX28 (PTDH3) vs. 0.0001:DIX18 (PMFA1)	-0.5325	-1,313 to 0,2479	No	ns	0.9011					0:PTDH3 vs. 10-4:PIME4	-0.09241	-0,2788 to 0,09401	No	ns	>0,9999					0:DIX28 (PTDH3) vs. 0.0001:DIX18 (PMFA1)	1.343	0,6261 to 2,059	Yes	****	<0,0001
	0:PTDH3 vs. 10-4:PHPF1	2.09	1,309 to 2,870	Yes	****	<0,0001															0:DIX28 (PTDH3) vs. 0.0001:DIX19 (PAGA2)	-0.8298	-1,610 to -0,04929	Yes	*	0.0181					0:PTDH3 vs. 10-4:PHPF1	0.02976	-0,1567 to 0,2162	No	ns	>0,9999					0:DIX28 (PTDH3) vs. 0.0001:DIX19 (PAGA2)	1.315	0,5981 to 2,031	Yes	****	<0,0001
	0:PTDH3 vs. 10-4:PYCL076W	1.91	1,130 to 2,691	Yes	****	<0,0001															0:DIX28 (PTDH3) vs. 0.0001:DIX20 (PYCL076W)	-1.083	-1,864 to -0,3028	Yes	****	<0,0001					0:PTDH3 vs. 10-4:PYCL076W	-0.06062	-0,2470 to 0,1258	No	ns	>0,9999					0:DIX28 (PTDH3) vs. 0.0001:DIX20 (PYCL076W)	1.971	1,254 to 2,688	Yes	****	<0,0001
	0:PTDH3 vs. 10-4:PMFA1	1.345	0,5641 to 2,125	Yes	****	<0,0001															0:DIX28 (PTDH3) vs. 0.0001:DIX21 (PIME4)	-0.454	-1,234 to 0,3265	No	ns	0.9952					0:PTDH3 vs. 10-4:PMFA1	0.001807	-0,1846 to 0,1882	No	ns	>0,9999					0:DIX28 (PTDH3) vs. 0.0001:DIX21 (PIME4)	2.649	1,932 to 3,366	Yes	****	<0,0001
	0:PTDH3 vs. 10-4:PFIG1	1.632	0,8517 to 2,413	Yes	****	<0,0001															0:DIX28 (PTDH3) vs. 0.0001:DIX22 (PHPF1)	0.2845	-0,4960 to 1,065	No	ns	>0,9999					0:PTDH3 vs. 10-4:PFIG1	-0.1035	-0,2899 to 0,08291	No	ns	0.9985					0:DIX28 (PTDH3) vs. 0.0001:DIX22 (PHPF1)	2.06	1,343 to 2,777	Yes	****	<0,0001
	0:PTDH3 vs. 10-4:PAGA2	1.286	0,5058 to 2,067	Yes	****	<0,0001															0:DIX28 (PTDH3) vs. 0.0001:DIX23 (PCSS1)	0.1355	-0,6449 to 0,9160	No	ns	>0,9999					0:PTDH3 vs. 10-4:PAGA2	-0.02848	-0,2149 to 0,1579	No	ns	>0,9999					0:DIX28 (PTDH3) vs. 0.0001:DIX23 (PCSS1)	2.831	2,114 to 3,548	Yes	****	<0,0001
	0:PTDH3 vs. 10-4:PFUS1	1.091	0,3101 to 1,871	Yes	****	<0,0001															0:DIX28 (PTDH3) vs. 0.0001:DIX24 (PFUS1)	-1.321	-2,102 to -0,5410	Yes	****	<0,0001					0:PTDH3 vs. 10-4:PFUS1	-0.1135	-0,3000 to 0,07288	No	ns	0.9864					0:DIX28 (PTDH3) vs. 0.0001:DIX24 (PFUS1)	1.204	0,4874 to 1,921	Yes	****	<0,0001
	0:PTDH3 vs. 10-4:PMFA2	-0.03578	-0,8163 to 0,7447	No	ns	>0,9999															0:DIX28 (PTDH3) vs. 0.0001:DIX25 (PFIG1)	-1.246	-2,026 to -0,4655	Yes	****	<0,0001					0:PTDH3 vs. 10-4:PMFA2	0.007305	-0,1791 to 0,1937	No	ns	>0,9999					0:DIX28 (PTDH3) vs. 0.0001:DIX25 (PFIG1)	1.736	1,019 to 2,452	Yes	****	<0,0001
	0:PTDH3 vs. 10-3:PCSS1	2.186	1,405 to 2,966	Yes	****	<0,0001															0:DIX28 (PTDH3) vs. 0.001:DIX17 (PMFA2)	-1.103	-1,884 to -0,3226	Yes	****	<0,0001					0:PTDH3 vs. 10-3:PCSS1	-0.1868	-0,3732 to -0,0003896	Yes	*	0.0484					0:DIX28 (PTDH3) vs. 0.001:DIX17 (PMFA2)	-0.5015	-1,218 to 0,2151	No	ns	0.8611
	0:PTDH3 vs. 10-3:PIME4	1.971	1,191 to 2,752	Yes	****	<0,0001															0:DIX28 (PTDH3) vs. 0.001:DIX18 (PMFA1)	-1.118	-1,898 to -0,3373	Yes	****	<0,0001					0:PTDH3 vs. 10-3:PIME4	-0.2192	-0,4057 to -0,03282	Yes	**	0.0023					0:DIX28 (PTDH3) vs. 0.001:DIX18 (PMFA1)	0.8843	0,1677 to 1,601	Yes	***	0.0007
	0:PTDH3 vs. 10-3:PHPF1	1.505	0,7242 to 2,285	Yes	****	<0,0001															0:DIX28 (PTDH3) vs. 0.001:DIX19 (PAGA2)	-1.415	-2,196 to -0,6346	Yes	****	<0,0001					0:PTDH3 vs. 10-3:PHPF1	-0.09707	-0,2835 to 0,08935	No	ns	0.9998					0:DIX28 (PTDH3) vs. 0.001:DIX19 (PAGA2)	0.8563	0,1396 to 1,573	Yes	**	0.0016
	0:PTDH3 vs. 10-3:PYCL076W	1.325	0,5445 to 2,105	Yes	****	<0,0001															0:DIX28 (PTDH3) vs. 0.001:DIX20 (PYCL076W)	-1.669	-2,449 to -0,8881	Yes	****	<0,0001					0:PTDH3 vs. 10-3:PYCL076W	-0.1875	-0,3739 to -0,001032	Yes	*	0.0459					0:DIX28 (PTDH3) vs. 0.001:DIX20 (PYCL076W)	1.512	0,7958 to 2,229	Yes	****	<0,0001
	0:PTDH3 vs. 10-3:PMFA1	0.7593	-0,02115 to 1,540	No	ns	0.0746															0:DIX28 (PTDH3) vs. 0.001:DIX21 (PIME4)	-1.039	-1,820 to -0,2588	Yes	****	<0,0001					0:PTDH3 vs. 10-3:PMFA1	-0.125	-0,3114 to 0,06140	No	ns	0.9232					0:DIX28 (PTDH3) vs. 0.001:DIX21 (PIME4)	2.191	1,474 to 2,907	Yes	****	<0,0001
	0:PTDH3 vs. 10-3:PFIG1	1.047	0,2664 to 1,827	Yes	****	<0,0001															0:DIX28 (PTDH3) vs. 0.001:DIX22 (PHPF1)	-0.3008	-1,081 to 0,4797	No	ns	>0,9999					0:PTDH3 vs. 10-3:PFIG1	-0.2303	-0,4168 to -0,04392	Yes	***	0.0007					0:DIX28 (PTDH3) vs. 0.001:DIX22 (PHPF1)	1.602	0,8850 to 2,318	Yes	****	<0,0001
	0:PTDH3 vs. 10-3:PAGA2	0.701	-0,07949 to 1,481	No	ns	0.1986															0:DIX28 (PTDH3) vs. 0.001:DIX23 (PCSS1)	-0.4497	-1,230 to 0,3307	No	ns	0.9962					0:PTDH3 vs. 10-3:PAGA2	-0.1553	-0,3417 to 0,03111	No	ns	0.3908					0:DIX28 (PTDH3) vs. 0.001:DIX23 (PCSS1)	2.373	1,656 to 3,089	Yes	****	<0,0001
	0:PTDH3 vs. 10-3:PFUS1	0.5053	-0,2752 to 1,286	No	ns	0.9565															0:DIX28 (PTDH3) vs. 0.001:DIX24 (PFUS1)	-1.907	-2,687 to -1,126	Yes	****	<0,0001					0:PTDH3 vs. 10-3:PFUS1	-0.2404	-0,4268 to -0,05395	Yes	***	0.0002					0:DIX28 (PTDH3) vs. 0.001:DIX24 (PFUS1)	0.7457	0,02900 to 1,462	Yes	*	0.0264
	0:PTDH3 vs. 10-3:PMFA2	-0.6211	-1,402 to 0,1594	No	ns	0.5301															0:DIX28 (PTDH3) vs. 0.001:DIX25 (PFIG1)	-1.831	-2,612 to -1,051	Yes	****	<0,0001					0:PTDH3 vs. 10-3:PMFA2	-0.1195	-0,3059 to 0,06689	No	ns	0.9633					0:DIX28 (PTDH3) vs. 0.001:DIX25 (PFIG1)	1.277	0,5606 to 1,994	Yes	****	<0,0001
	0:PTDH3 vs. 10-2:PCSS1	1.498	0,7175 to 2,278	Yes	****	<0,0001															0:DIX28 (PTDH3) vs. 0.01:DIX17 (PMFA2)	-1.791	-2,571 to -1,010	Yes	****	<0,0001					0:PTDH3 vs. 10-2:PCSS1	-0.4938	-0,6803 to -0,3074	Yes	****	<0,0001					0:DIX28 (PTDH3) vs. 0.01:DIX17 (PMFA2)	-0.8822	-1,599 to -0,1656	Yes	***	0.0008
	0:PTDH3 vs. 10-2:PIME4	1.284	0,5032 to 2,064	Yes	****	<0,0001															0:DIX28 (PTDH3) vs. 0.01:DIX18 (PMFA1)	-1.806	-2,586 to -1,025	Yes	****	<0,0001					0:PTDH3 vs. 10-2:PIME4	-0.5263	-0,7127 to -0,3399	Yes	****	<0,0001					0:DIX28 (PTDH3) vs. 0.01:DIX18 (PMFA1)	0.5036	-0,2130 to 1,220	No	ns	0.8536
	0:PTDH3 vs. 10-2:PHPF1	0.8169	0,03641 to 1,597	Yes	*	0.0239															0:DIX28 (PTDH3) vs. 0.01:DIX19 (PAGA2)	-2.103	-2,883 to -1,322	Yes	****	<0,0001					0:PTDH3 vs. 10-2:PHPF1	-0.4041	-0,5905 to -0,2177	Yes	****	<0,0001					0:DIX28 (PTDH3) vs. 0.01:DIX19 (PAGA2)	0.4756	-0,2411 to 1,192	No	ns	0.9347
	0:PTDH3 vs. 10-2:PYCL076W	0.6372	-0,1432 to 1,418	No	ns	0.4512															0:DIX28 (PTDH3) vs. 0.01:DIX20 (PYCL076W)	-2.356	-3,137 to -1,576	Yes	****	<0,0001					0:PTDH3 vs. 10-2:PYCL076W	-0.4945	-0,6809 to -0,3081	Yes	****	<0,0001					0:DIX28 (PTDH3) vs. 0.01:DIX20 (PYCL076W)	1.132	0,4150 to 1,848	Yes	****	<0,0001
	0:PTDH3 vs. 10-2:PMFA1	0.07159	-0,7089 to 0,8521	No	ns	>0,9999															0:DIX28 (PTDH3) vs. 0.01:DIX21 (PIME4)	-1.727	-2,508 to -0,9466	Yes	****	<0,0001					0:PTDH3 vs. 10-2:PMFA1	-0.4321	-0,6185 to -0,2456	Yes	****	<0,0001					0:DIX28 (PTDH3) vs. 0.01:DIX21 (PIME4)	1.81	1,093 to 2,527	Yes	****	<0,0001
	0:PTDH3 vs. 10-2:PFIG1	0.3592	-0,4213 to 1,140	No	ns	>0,9999															0:DIX28 (PTDH3) vs. 0.01:DIX22 (PHPF1)	-0.9885	-1,769 to -0,2080	Yes	***	0.0004					0:PTDH3 vs. 10-2:PFIG1	-0.5374	-0,7238 to -0,3509	Yes	****	<0,0001					0:DIX28 (PTDH3) vs. 0.01:DIX22 (PHPF1)	1.221	0,5043 to 1,938	Yes	****	<0,0001
	0:PTDH3 vs. 10-2:PAGA2	0.01324	-0,7672 to 0,7937	No	ns	>0,9999															0:DIX28 (PTDH3) vs. 0.01:DIX23 (PCSS1)	-1.137	-1,918 to -0,3570	Yes	****	<0,0001					0:PTDH3 vs. 10-2:PAGA2	-0.4623	-0,6488 to -0,2759	Yes	****	<0,0001					0:DIX28 (PTDH3) vs. 0.01:DIX23 (PCSS1)	1.992	1,275 to 2,709	Yes	****	<0,0001
	0:PTDH3 vs. 10-2:PFUS1	-0.1824	-0,9629 to 0,5980	No	ns	>0,9999															0:DIX28 (PTDH3) vs. 0.01:DIX24 (PFUS1)	-2.594	-3,375 to -1,814	Yes	****	<0,0001					0:PTDH3 vs. 10-2:PFUS1	-0.5474	-0,7338 to -0,3610	Yes	****	<0,0001					0:DIX28 (PTDH3) vs. 0.01:DIX24 (PFUS1)	0.365	-0,3517 to 1,082	No	ns	0.9999
	0:PTDH3 vs. 10-2:PMFA2	-1.309	-2,089 to -0,5283	Yes	****	<0,0001															0:DIX28 (PTDH3) vs. 0.01:DIX25 (PFIG1)	-2.519	-3,299 to -1,738	Yes	****	<0,0001					0:PTDH3 vs. 10-2:PMFA2	-0.4266	-0,6130 to -0,2401	Yes	****	<0,0001					0:DIX28 (PTDH3) vs. 0.01:DIX25 (PFIG1)	0.8965	0,1798 to 1,613	Yes	***	0.0005
	0:PTDH3 vs. 10-1:Neg.Con.	1.954	1,043 to 2,866	Yes	****	<0,0001															0:DIX28 (PTDH3) vs. 0.1:DIX14 (Neg.Con.)	-1.299	-2,211 to -0,3879	Yes	****	<0,0001					0:PTDH3 vs. 10-1:Neg.Con.	-0.5341	-0,7518 to -0,3164	Yes	****	<0,0001					0:DIX28 (PTDH3) vs. 0.1:DIX14 (Neg.Con.)	2.488	1,652 to 3,325	Yes	****	<0,0001
	0:PTDH3 vs. 10-1:PPGK1	-0.3729	-1,284 to 0,5385	No	ns	>0,9999															0:DIX28 (PTDH3) vs. 0.1:DIX27 (PPGK1)	-1.292	-2,204 to -0,3811	Yes	****	<0,0001					0:PTDH3 vs. 10-1:PPGK1	-0.5052	-0,7229 to -0,2875	Yes	****	<0,0001					0:DIX28 (PTDH3) vs. 0.1:DIX27 (PPGK1)	0.1322	-0,7047 to 0,9691	No	ns	>0,9999
	0:PTDH3 vs. 10-1:PTDH3	-1.317	-1,725 to -0,9097	Yes	****	<0,0001															0:DIX28 (PTDH3) vs. 0.1:DIX28 (PTDH3)	-1.317	-1,725 to -0,9097	Yes	****	<0,0001					0:PTDH3 vs. 10-1:PTDH3	-0.5341	-0,6314 to -0,4367	Yes	****	<0,0001					0:DIX28 (PTDH3) vs. 0.1:DIX28 (PTDH3)	-0.7832	-1,158 to -0,4090	Yes	****	<0,0001
	0:PTDH3 vs. 10-1:PCSS1	1.371	0,5675 to 2,175	Yes	****	<0,0001															0:DIX28 (PTDH3) vs. 0.1:DIX17 (PMFA2)	-1.918	-2,721 to -1,114	Yes	****	<0,0001					0:PTDH3 vs. 10-1:PCSS1	-0.6184	-0,8104 to -0,4264	Yes	****	<0,0001					0:DIX28 (PTDH3) vs. 0.1:DIX17 (PMFA2)	-0.8844	-1,622 to -0,1463	Yes	**	0.0015
	0:PTDH3 vs. 10-1:PIME4	1.157	0,3532 to 1,961	Yes	****	<0,0001															0:DIX28 (PTDH3) vs. 0.1:DIX18 (PMFA1)	-1.932	-2,736 to -1,128	Yes	****	<0,0001					0:PTDH3 vs. 10-1:PIME4	-0.6508	-0,8428 to -0,4588	Yes	****	<0,0001					0:DIX28 (PTDH3) vs. 0.1:DIX18 (PMFA1)	0.5015	-0,2366 to 1,240	No	ns	0.9069
	0:PTDH3 vs. 10-1:PHPF1	0.6902	-0,1136 to 1,494	No	ns	0.3059															0:DIX28 (PTDH3) vs. 0.1:DIX19 (PAGA2)	-2.229	-3,033 to -1,426	Yes	****	<0,0001					0:PTDH3 vs. 10-1:PHPF1	-0.5286	-0,7206 to -0,3367	Yes	****	<0,0001					0:DIX28 (PTDH3) vs. 0.1:DIX19 (PAGA2)	0.4734	-0,2647 to 1,212	No	ns	0.963
	0:PTDH3 vs. 10-1:PYCL076W	0.5105	-0,2932 to 1,314	No	ns	0.969															0:DIX28 (PTDH3) vs. 0.1:DIX20 (PYCL076W)	-2.483	-3,287 to -1,679	Yes	****	<0,0001					0:PTDH3 vs. 10-1:PYCL076W	-0.619	-0,8110 to -0,4270	Yes	****	<0,0001					0:DIX28 (PTDH3) vs. 0.1:DIX20 (PYCL076W)	1.13	0,3915 to 1,868	Yes	****	<0,0001
	0:PTDH3 vs. 10-1:PMFA1	-0.05511	-0,8589 to 0,7487	No	ns	>0,9999															0:DIX28 (PTDH3) vs. 0.1:DIX21 (PIME4)	-1.854	-2,658 to -1,050	Yes	****	<0,0001					0:PTDH3 vs. 10-1:PMFA1	-0.5566	-0,7486 to -0,3646	Yes	****	<0,0001					0:DIX28 (PTDH3) vs. 0.1:DIX21 (PIME4)	1.808	1,070 to 2,546	Yes	****	<0,0001
	0:PTDH3 vs. 10-1:PFIG1	0.2325	-0,5713 to 1,036	No	ns	>0,9999															0:DIX28 (PTDH3) vs. 0.1:DIX22 (PHPF1)	-1.115	-1,919 to -0,3114	Yes	****	<0,0001					0:PTDH3 vs. 10-1:PFIG1	-0.6619	-0,8539 to -0,4699	Yes	****	<0,0001					0:DIX28 (PTDH3) vs. 0.1:DIX22 (PHPF1)	1.219	0,4807 to 1,957	Yes	****	<0,0001
	0:PTDH3 vs. 10-1:PAGA2	-0.1135	-0,9172 to 0,6903	No	ns	>0,9999															0:DIX28 (PTDH3) vs. 0.1:DIX23 (PCSS1)	-1.264	-2,068 to -0,4604	Yes	****	<0,0001					0:PTDH3 vs. 10-1:PAGA2	-0.5869	-0,7789 to -0,3949	Yes	****	<0,0001					0:DIX28 (PTDH3) vs. 0.1:DIX23 (PCSS1)	1.99	1,252 to 2,728	Yes	****	<0,0001
	0:PTDH3 vs. 10-1:PFUS1	-0.3091	-1,113 to 0,4947	No	ns	>0,9999															0:DIX28 (PTDH3) vs. 0.1:DIX24 (PFUS1)	-2.721	-3,525 to -1,917	Yes	****	<0,0001					0:PTDH3 vs. 10-1:PFUS1	-0.6719	-0,8639 to -0,4800	Yes	****	<0,0001					0:DIX28 (PTDH3) vs. 0.1:DIX24 (PFUS1)	0.3628	-0,3753 to 1,101	No	ns	>0,9999
	0:PTDH3 vs. 10-1:PMFA2	-1.436	-2,239 to -0,6317	Yes	****	<0,0001															0:DIX28 (PTDH3) vs. 0.1:DIX25 (PFIG1)	-2.646	-3,449 to -1,842	Yes	****	<0,0001					0:PTDH3 vs. 10-1:PMFA2	-0.5511	-0,7431 to -0,3591	Yes	****	<0,0001					0:DIX28 (PTDH3) vs. 0.1:DIX25 (PFIG1)	0.8944	0,1563 to 1,632	Yes	**	0.0011
	0:PTDH3 vs. 100:PCSS1	1.208	0,4278 to 1,989	Yes	****	<0,0001															0:DIX28 (PTDH3) vs. 1:DIX17 (PMFA2)	-2.081	-2,861 to -1,300	Yes	****	<0,0001					0:PTDH3 vs. 100:PCSS1	-0.6612	-0,8477 to -0,4748	Yes	****	<0,0001					0:DIX28 (PTDH3) vs. 1:DIX17 (PMFA2)	-1.005	-1,721 to -0,2878	Yes	****	<0,0001
	0:PTDH3 vs. 100:PIME4	0.994	0,2136 to 1,775	Yes	***	0.0003															0:DIX28 (PTDH3) vs. 1:DIX18 (PMFA1)	-2.095	-2,876 to -1,315	Yes	****	<0,0001					0:PTDH3 vs. 100:PIME4	-0.6937	-0,8801 to -0,5073	Yes	****	<0,0001					0:DIX28 (PTDH3) vs. 1:DIX18 (PMFA1)	0.3814	-0,3353 to 1,098	No	ns	0.9996
	0:PTDH3 vs. 100:PHPF1	0.5272	-0,2533 to 1,308	No	ns	0.9145															0:DIX28 (PTDH3) vs. 1:DIX19 (PAGA2)	-2.392	-3,173 to -1,612	Yes	****	<0,0001					0:PTDH3 vs. 100:PHPF1	-0.5715	-0,7579 to -0,3851	Yes	****	<0,0001					0:DIX28 (PTDH3) vs. 1:DIX19 (PAGA2)	0.3533	-0,3634 to 1,070	No	ns	>0,9999
	0:PTDH3 vs. 100:PYCL076W	0.3476	-0,4329 to 1,128	No	ns	>0,9999															0:DIX28 (PTDH3) vs. 1:DIX20 (PYCL076W)	-2.646	-3,426 to -1,866	Yes	****	<0,0001					0:PTDH3 vs. 100:PYCL076W	-0.6619	-0,8483 to -0,4755	Yes	****	<0,0001					0:DIX28 (PTDH3) vs. 1:DIX20 (PYCL076W)	1.009	0,2928 to 1,726	Yes	****	<0,0001
	0:PTDH3 vs. 100:PMFA1	-0.2181	-0,9986 to 0,5624	No	ns	>0,9999															0:DIX28 (PTDH3) vs. 1:DIX21 (PIME4)	-2.017	-2,797 to -1,236	Yes	****	<0,0001					0:PTDH3 vs. 100:PMFA1	-0.5995	-0,7859 to -0,4130	Yes	****	<0,0001					0:DIX28 (PTDH3) vs. 1:DIX21 (PIME4)	1.688	0,9710 to 2,404	Yes	****	<0,0001
	0:PTDH3 vs. 100:PFIG1	0.06948	-0,7110 to 0,8500	No	ns	>0,9999															0:DIX28 (PTDH3) vs. 1:DIX22 (PHPF1)	-1.278	-2,059 to -0,4977	Yes	****	<0,0001					0:PTDH3 vs. 100:PFIG1	-0.7048	-0,8912 to -0,5183	Yes	****	<0,0001					0:DIX28 (PTDH3) vs. 1:DIX22 (PHPF1)	1.099	0,3820 to 1,815	Yes	****	<0,0001
	0:PTDH3 vs. 100:PAGA2	-0.2764	-1,057 to 0,5040	No	ns	>0,9999															0:DIX28 (PTDH3) vs. 1:DIX23 (PCSS1)	-1.427	-2,208 to -0,6467	Yes	****	<0,0001					0:PTDH3 vs. 100:PAGA2	-0.6297	-0,8162 to -0,4433	Yes	****	<0,0001					0:DIX28 (PTDH3) vs. 1:DIX23 (PCSS1)	1.87	1,153 to 2,586	Yes	****	<0,0001
	0:PTDH3 vs. 100:PFUS1	-0.4721	-1,253 to 0,3084	No	ns	0.9883															0:DIX28 (PTDH3) vs. 1:DIX24 (PFUS1)	-2.884	-3,665 to -2,104	Yes	****	<0,0001					0:PTDH3 vs. 100:PFUS1	-0.7148	-0,9012 to -0,5284	Yes	****	<0,0001					0:DIX28 (PTDH3) vs. 1:DIX24 (PFUS1)	0.2427	-0,4740 to 0,9594	No	ns	>0,9999
	0:PTDH3 vs. 100:PMFA2	-1.598	-2,379 to -0,8180	Yes	****	<0,0001															0:DIX28 (PTDH3) vs. 1:DIX25 (PFIG1)	-2.809	-3,589 to -2,028	Yes	****	<0,0001					0:PTDH3 vs. 100:PMFA2	-0.594	-0,7804 to -0,4075	Yes	****	<0,0001					0:DIX28 (PTDH3) vs. 1:DIX25 (PFIG1)	0.7742	0,05756 to 1,491	Yes	*	0.0135
	0:PTDH3 vs. 101:PCSS1	1.269	0,4883 to 2,049	Yes	****	<0,0001															0:DIX28 (PTDH3) vs. 10:DIX17 (PMFA2)	-2.02	-2,801 to -1,240	Yes	****	<0,0001					0:PTDH3 vs. 101:PCSS1	-0.587	-0,7734 to -0,4006	Yes	****	<0,0001					0:DIX28 (PTDH3) vs. 10:DIX17 (PMFA2)	-1.018	-1,735 to -0,3016	Yes	****	<0,0001
	0:PTDH3 vs. 101:PIME4	1.055	0,2741 to 1,835	Yes	****	<0,0001															0:DIX28 (PTDH3) vs. 10:DIX18 (PMFA1)	-2.035	-2,815 to -1,254	Yes	****	<0,0001					0:PTDH3 vs. 101:PIME4	-0.6194	-0,8058 to -0,4330	Yes	****	<0,0001					0:DIX28 (PTDH3) vs. 10:DIX18 (PMFA1)	0.3676	-0,3491 to 1,084	No	ns	0.9999
	0:PTDH3 vs. 101:PHPF1	0.5877	-0,1928 to 1,368	No	ns	0.6934															0:DIX28 (PTDH3) vs. 10:DIX19 (PAGA2)	-2.332	-3,112 to -1,551	Yes	****	<0,0001					0:PTDH3 vs. 101:PHPF1	-0.4972	-0,6837 to -0,3108	Yes	****	<0,0001					0:DIX28 (PTDH3) vs. 10:DIX19 (PAGA2)	0.3395	-0,3771 to 1,056	No	ns	>0,9999
	0:PTDH3 vs. 101:PYCL076W	0.4081	-0,3724 to 1,189	No	ns	0.9997															0:DIX28 (PTDH3) vs. 10:DIX20 (PYCL076W)	-2.585	-3,366 to -1,805	Yes	****	<0,0001					0:PTDH3 vs. 101:PYCL076W	-0.5876	-0,7740 to -0,4012	Yes	****	<0,0001					0:DIX28 (PTDH3) vs. 10:DIX20 (PYCL076W)	0.9957	0,2790 to 1,712	Yes	****	<0,0001
	0:PTDH3 vs. 101:PMFA1	-0.1576	-0,9381 to 0,6229	No	ns	>0,9999															0:DIX28 (PTDH3) vs. 10:DIX21 (PIME4)	-1.956	-2,737 to -1,176	Yes	****	<0,0001					0:PTDH3 vs. 101:PMFA1	-0.5252	-0,7116 to -0,3388	Yes	****	<0,0001					0:DIX28 (PTDH3) vs. 10:DIX21 (PIME4)	1.674	0,9573 to 2,391	Yes	****	<0,0001
	0:PTDH3 vs. 101:PFIG1	0.13	-0,6505 to 0,9105	No	ns	>0,9999															0:DIX28 (PTDH3) vs. 10:DIX22 (PHPF1)	-1.218	-1,998 to -0,4372	Yes	****	<0,0001					0:PTDH3 vs. 101:PFIG1	-0.6305	-0,8169 to -0,4441	Yes	****	<0,0001					0:DIX28 (PTDH3) vs. 10:DIX22 (PHPF1)	1.085	0,3683 to 1,802	Yes	****	<0,0001
	0:PTDH3 vs. 101:PAGA2	-0.2159	-0,9964 to 0,5645	No	ns	>0,9999															0:DIX28 (PTDH3) vs. 10:DIX23 (PCSS1)	-1.367	-2,147 to -0,5862	Yes	****	<0,0001					0:PTDH3 vs. 101:PAGA2	-0.5555	-0,7419 to -0,3691	Yes	****	<0,0001					0:DIX28 (PTDH3) vs. 10:DIX23 (PCSS1)	1.856	1,139 to 2,572	Yes	****	<0,0001
	0:PTDH3 vs. 101:PFUS1	-0.4116	-1,192 to 0,3689	No	ns	0.9997															0:DIX28 (PTDH3) vs. 10:DIX24 (PFUS1)	-2.824	-3,604 to -2,043	Yes	****	<0,0001					0:PTDH3 vs. 101:PFUS1	-0.6405	-0,8270 to -0,4541	Yes	****	<0,0001					0:DIX28 (PTDH3) vs. 10:DIX24 (PFUS1)	0.2289	-0,4877 to 0,9456	No	ns	>0,9999
	0:PTDH3 vs. 101:PMFA2	-1.538	-2,318 to -0,7575	Yes	****	<0,0001															0:DIX28 (PTDH3) vs. 10:DIX25 (PFIG1)	-2.748	-3,529 to -1,968	Yes	****	<0,0001					0:PTDH3 vs. 101:PMFA2	-0.5197	-0,7061 to -0,3333	Yes	****	<0,0001					0:DIX28 (PTDH3) vs. 10:DIX25 (PFIG1)	0.7605	0,04381 to 1,477	Yes	*	0.0188
	0:PTDH3 vs. 102:Neg.Con.	1.916	1,005 to 2,828	Yes	****	<0,0001															0:DIX28 (PTDH3) vs. 100:DIX14 (Neg.Con.)	-1.337	-2,249 to -0,4259	Yes	****	<0,0001					0:PTDH3 vs. 102:Neg.Con.	-0.521	-0,7387 to -0,3033	Yes	****	<0,0001					0:DIX28 (PTDH3) vs. 100:DIX14 (Neg.Con.)	2.437	1,601 to 3,274	Yes	****	<0,0001
	0:PTDH3 vs. 102:PPGK1	-0.4109	-1,322 to 0,5005	No	ns	>0,9999															0:DIX28 (PTDH3) vs. 100:DIX27 (PPGK1)	-1.33	-2,242 to -0,4190	Yes	****	<0,0001					0:PTDH3 vs. 102:PPGK1	-0.4921	-0,7098 to -0,2744	Yes	****	<0,0001					0:DIX28 (PTDH3) vs. 100:DIX27 (PPGK1)	0.08123	-0,7557 to 0,9181	No	ns	>0,9999
	0:PTDH3 vs. 102:PTDH3	-1.355	-1,763 to -0,9476	Yes	****	<0,0001															0:DIX28 (PTDH3) vs. 100:DIX28 (PTDH3)	-1.355	-1,763 to -0,9476	Yes	****	<0,0001					0:PTDH3 vs. 102:PTDH3	-0.521	-0,6183 to -0,4236	Yes	****	<0,0001					0:DIX28 (PTDH3) vs. 100:DIX28 (PTDH3)	-0.8342	-1,208 to -0,4600	Yes	****	<0,0001
	0:PTDH3 vs. 102:PCSS1	1.333	0,5296 to 2,137	Yes	****	<0,0001															0:DIX28 (PTDH3) vs. 100:DIX17 (PMFA2)	-1.955	-2,759 to -1,152	Yes	****	<0,0001					0:PTDH3 vs. 102:PCSS1	-0.6053	-0,7973 to -0,4133	Yes	****	<0,0001					0:DIX28 (PTDH3) vs. 100:DIX17 (PMFA2)	-0.9354	-1,673 to -0,1973	Yes	***	0.0004
	0:PTDH3 vs. 102:PIME4	1.119	0,3153 to 1,923	Yes	****	<0,0001															0:DIX28 (PTDH3) vs. 100:DIX18 (PMFA1)	-1.97	-2,774 to -1,166	Yes	****	<0,0001					0:PTDH3 vs. 102:PIME4	-0.6377	-0,8297 to -0,4458	Yes	****	<0,0001					0:DIX28 (PTDH3) vs. 100:DIX18 (PMFA1)	0.4505	-0,2876 to 1,189	No	ns	0.9858
	0:PTDH3 vs. 102:PHPF1	0.6523	-0,1515 to 1,456	No	ns	0.4699															0:DIX28 (PTDH3) vs. 100:DIX19 (PAGA2)	-2.267	-3,071 to -1,464	Yes	****	<0,0001					0:PTDH3 vs. 102:PHPF1	-0.5156	-0,7076 to -0,3236	Yes	****	<0,0001					0:DIX28 (PTDH3) vs. 100:DIX19 (PAGA2)	0.4224	-0,3156 to 1,161	No	ns	0.9967
	0:PTDH3 vs. 102:PYCL076W	0.4726	-0,3312 to 1,276	No	ns	0.9938															0:DIX28 (PTDH3) vs. 100:DIX20 (PYCL076W)	-2.521	-3,325 to -1,717	Yes	****	<0,0001					0:PTDH3 vs. 102:PYCL076W	-0.606	-0,7979 to -0,4140	Yes	****	<0,0001					0:DIX28 (PTDH3) vs. 100:DIX20 (PYCL076W)	1.079	0,3405 to 1,817	Yes	****	<0,0001
	0:PTDH3 vs. 102:PMFA1	-0.09303	-0,8968 to 0,7107	No	ns	>0,9999															0:DIX28 (PTDH3) vs. 100:DIX21 (PIME4)	-1.892	-2,695 to -1,088	Yes	****	<0,0001					0:PTDH3 vs. 102:PMFA1	-0.5435	-0,7355 to -0,3516	Yes	****	<0,0001					0:DIX28 (PTDH3) vs. 100:DIX21 (PIME4)	1.757	1,019 to 2,495	Yes	****	<0,0001
	0:PTDH3 vs. 102:PFIG1	0.1945	-0,6092 to 0,9983	No	ns	>0,9999															0:DIX28 (PTDH3) vs. 100:DIX22 (PHPF1)	-1.153	-1,957 to -0,3493	Yes	****	<0,0001					0:PTDH3 vs. 102:PFIG1	-0.6488	-0,8408 to -0,4569	Yes	****	<0,0001					0:DIX28 (PTDH3) vs. 100:DIX22 (PHPF1)	1.168	0,4298 to 1,906	Yes	****	<0,0001
	0:PTDH3 vs. 102:PAGA2	-0.1514	-0,9552 to 0,6524	No	ns	>0,9999															0:DIX28 (PTDH3) vs. 100:DIX23 (PCSS1)	-1.302	-2,106 to -0,4983	Yes	****	<0,0001					0:PTDH3 vs. 102:PAGA2	-0.5738	-0,7658 to -0,3818	Yes	****	<0,0001					0:DIX28 (PTDH3) vs. 100:DIX23 (PCSS1)	1.939	1,201 to 2,677	Yes	****	<0,0001
	0:PTDH3 vs. 102:PFUS1	-0.347	-1,151 to 0,4567	No	ns	>0,9999															0:DIX28 (PTDH3) vs. 100:DIX24 (PFUS1)	-2.759	-3,563 to -1,955	Yes	****	<0,0001					0:PTDH3 vs. 102:PFUS1	-0.6589	-0,8509 to -0,4669	Yes	****	<0,0001					0:DIX28 (PTDH3) vs. 100:DIX24 (PFUS1)	0.3118	-0,4262 to 1,050	No	ns	>0,9999
	0:PTDH3 vs. 102:PMFA2	-1.473	-2,277 to -0,6696	Yes	****	<0,0001															0:DIX28 (PTDH3) vs. 100:DIX25 (PFIG1)	-2.684	-3,487 to -1,880	Yes	****	<0,0001					0:PTDH3 vs. 102:PMFA2	-0.538	-0,7300 to -0,3461	Yes	****	<0,0001					0:DIX28 (PTDH3) vs. 100:DIX25 (PFIG1)	0.8434	0,1053 to 1,581	Yes	**	0.0044
	0:PCSS1 vs. 0:PIME4	-0.2143	-0,7135 to 0,2849	No	ns	>0,9999															0:DIX17 (PMFA2) vs. 0:DIX18 (PMFA1)	-0.01471	-0,5139 to 0,4845	No	ns	>0,9999					0:PCSS1 vs. 0:PIME4	-0.03243	-0,1517 to 0,08680	No	ns	>0,9999					0:DIX17 (PMFA2) vs. 0:DIX18 (PMFA1)	1.386	0,9275 to 1,844	Yes	****	<0,0001
	0:PCSS1 vs. 0:PHPF1	-0.6811	-1,180 to -0,1819	Yes	****	<0,0001															0:DIX17 (PMFA2) vs. 0:DIX19 (PAGA2)	-0.3119	-0,8111 to 0,1873	No	ns	0.9773					0:PCSS1 vs. 0:PHPF1	0.08974	-0,02949 to 0,2090	No	ns	0.6947					0:DIX17 (PMFA2) vs. 0:DIX19 (PAGA2)	1.358	0,8994 to 1,816	Yes	****	<0,0001
	0:PCSS1 vs. 0:PYCL076W	-0.8607	-1,360 to -0,3615	Yes	****	<0,0001															0:DIX17 (PMFA2) vs. 0:DIX20 (PYCL076W)	-0.5654	-1,065 to -0,06625	Yes	**	0.0053					0:PCSS1 vs. 0:PYCL076W	-0.0006425	-0,1199 to 0,1186	No	ns	>0,9999					0:DIX17 (PMFA2) vs. 0:DIX20 (PYCL076W)	2.014	1,556 to 2,472	Yes	****	<0,0001
	0:PCSS1 vs. 0:PMFA1	-1.426	-1,926 to -0,9272	Yes	****	<0,0001															0:DIX17 (PMFA2) vs. 0:DIX21 (PIME4)	0.06382	-0,4354 to 0,5630	No	ns	>0,9999					0:PCSS1 vs. 0:PMFA1	0.06179	-0,05745 to 0,1810	No	ns	0.9998					0:DIX17 (PMFA2) vs. 0:DIX21 (PIME4)	2.692	2,234 to 3,151	Yes	****	<0,0001
	0:PCSS1 vs. 0:PFIG1	-1.139	-1,638 to -0,6396	Yes	****	<0,0001															0:DIX17 (PMFA2) vs. 0:DIX22 (PHPF1)	0.8024	0,3032 to 1,302	Yes	****	<0,0001					0:PCSS1 vs. 0:PFIG1	-0.04353	-0,1628 to 0,07571	No	ns	>0,9999					0:DIX17 (PMFA2) vs. 0:DIX22 (PHPF1)	2.103	1,645 to 2,562	Yes	****	<0,0001
	0:PCSS1 vs. 0:PAGA2	-1.485	-1,984 to -0,9855	Yes	****	<0,0001															0:DIX17 (PMFA2) vs. 0:DIX23 (PCSS1)	0.6534	0,1542 to 1,153	Yes	***	0.0002					0:PCSS1 vs. 0:PAGA2	0.0315	-0,08773 to 0,1507	No	ns	>0,9999					0:DIX17 (PMFA2) vs. 0:DIX23 (PCSS1)	2.874	2,416 to 3,332	Yes	****	<0,0001
	0:PCSS1 vs. 0:PFUS1	-1.68	-2,180 to -1,181	Yes	****	<0,0001															0:DIX17 (PMFA2) vs. 0:DIX24 (PFUS1)	-0.8036	-1,303 to -0,3044	Yes	****	<0,0001					0:PCSS1 vs. 0:PFUS1	-0.05356	-0,1728 to 0,06567	No	ns	>0,9999					0:DIX17 (PMFA2) vs. 0:DIX24 (PFUS1)	1.247	0,7888 to 1,706	Yes	****	<0,0001
	0:PCSS1 vs. 0:PMFA2	-2.807	-3,306 to -2,308	Yes	****	<0,0001															0:DIX17 (PMFA2) vs. 0:DIX25 (PFIG1)	-0.7281	-1,227 to -0,2289	Yes	****	<0,0001					0:PCSS1 vs. 0:PMFA2	0.06728	-0,05195 to 0,1865	No	ns	0.9977					0:DIX17 (PMFA2) vs. 0:DIX25 (PFIG1)	1.779	1,320 to 2,237	Yes	****	<0,0001
	0:PCSS1 vs. 10-4:PCSS1	0.08242	-0,3682 to 0,5330	No	ns	>0,9999															0:DIX17 (PMFA2) vs. 0.0001:DIX17 (PMFA2)	0.08242	-0,3682 to 0,5330	No	ns	>0,9999					0:PCSS1 vs. 10-4:PCSS1	0.02435	-0,08328 to 0,1320	No	ns	>0,9999					0:DIX17 (PMFA2) vs. 0.0001:DIX17 (PMFA2)	0.05807	-0,3557 to 0,4718	No	ns	>0,9999
	0:PCSS1 vs. 10-4:PIME4	-0.1319	-0,8043 to 0,5406	No	ns	>0,9999															0:DIX17 (PMFA2) vs. 0.0001:DIX18 (PMFA1)	0.06772	-0,6048 to 0,7402	No	ns	>0,9999					0:PCSS1 vs. 10-4:PIME4	-0.008077	-0,1687 to 0,1525	No	ns	>0,9999					0:DIX17 (PMFA2) vs. 0.0001:DIX18 (PMFA1)	1.444	0,8264 to 2,061	Yes	****	<0,0001
	0:PCSS1 vs. 10-4:PHPF1	-0.5987	-1,271 to 0,07381	No	ns	0.2176															0:DIX17 (PMFA2) vs. 0.0001:DIX19 (PAGA2)	-0.2295	-0,9020 to 0,4430	No	ns	>0,9999					0:PCSS1 vs. 10-4:PHPF1	0.1141	-0,04653 to 0,2747	No	ns	0.8332					0:DIX17 (PMFA2) vs. 0.0001:DIX19 (PAGA2)	1.416	0,7984 to 2,033	Yes	****	<0,0001
	0:PCSS1 vs. 10-4:PYCL076W	-0.7783	-1,451 to -0,1058	Yes	**	0.0033															0:DIX17 (PMFA2) vs. 0.0001:DIX20 (PYCL076W)	-0.483	-1,156 to 0,1895	No	ns	0.8101					0:PCSS1 vs. 10-4:PYCL076W	0.02371	-0,1369 to 0,1843	No	ns	>0,9999					0:DIX17 (PMFA2) vs. 0.0001:DIX20 (PYCL076W)	2.072	1,455 to 2,690	Yes	****	<0,0001
	0:PCSS1 vs. 10-4:PMFA1	-1.344	-2,016 to -0,6715	Yes	****	<0,0001															0:DIX17 (PMFA2) vs. 0.0001:DIX21 (PIME4)	0.1462	-0,5262 to 0,8187	No	ns	>0,9999					0:PCSS1 vs. 10-4:PMFA1	0.08614	-0,07449 to 0,2468	No	ns	0.9994					0:DIX17 (PMFA2) vs. 0.0001:DIX21 (PIME4)	2.75	2,133 to 3,368	Yes	****	<0,0001
	0:PCSS1 vs. 10-4:PFIG1	-1.056	-1,729 to -0,3839	Yes	****	<0,0001															0:DIX17 (PMFA2) vs. 0.0001:DIX22 (PHPF1)	0.8848	0,2123 to 1,557	Yes	***	0.0001					0:PCSS1 vs. 10-4:PFIG1	-0.01918	-0,1798 to 0,1414	No	ns	>0,9999					0:DIX17 (PMFA2) vs. 0.0001:DIX22 (PHPF1)	2.161	1,544 to 2,779	Yes	****	<0,0001
	0:PCSS1 vs. 10-4:PAGA2	-1.402	-2,075 to -0,7298	Yes	****	<0,0001															0:DIX17 (PMFA2) vs. 0.0001:DIX23 (PCSS1)	0.7358	0,06331 to 1,408	Yes	*	0.0106					0:PCSS1 vs. 10-4:PAGA2	0.05585	-0,1048 to 0,2165	No	ns	>0,9999					0:DIX17 (PMFA2) vs. 0.0001:DIX23 (PCSS1)	2.932	2,315 to 3,550	Yes	****	<0,0001
	0:PCSS1 vs. 10-4:PFUS1	-1.598	-2,270 to -0,9255	Yes	****	<0,0001															0:DIX17 (PMFA2) vs. 0.0001:DIX24 (PFUS1)	-0.7212	-1,394 to -0,04869	Yes	*	0.0155					0:PCSS1 vs. 10-4:PFUS1	-0.02921	-0,1898 to 0,1314	No	ns	>0,9999					0:DIX17 (PMFA2) vs. 0.0001:DIX24 (PFUS1)	1.305	0,6878 to 1,923	Yes	****	<0,0001
	0:PCSS1 vs. 10-4:PMFA2	-2.724	-3,397 to -2,052	Yes	****	<0,0001															0:DIX17 (PMFA2) vs. 0.0001:DIX25 (PFIG1)	-0.6457	-1,318 to 0,02680	No	ns	0.0894					0:PCSS1 vs. 10-4:PMFA2	0.09164	-0,06899 to 0,2523	No	ns	0.997					0:DIX17 (PMFA2) vs. 0.0001:DIX25 (PFIG1)	1.837	1,219 to 2,454	Yes	****	<0,0001
	0:PCSS1 vs. 10-3:PCSS1	-0.5029	-0,9535 to -0,05224	Yes	**	0.0072															0:DIX17 (PMFA2) vs. 0.001:DIX17 (PMFA2)	-0.5029	-0,9535 to -0,05224	Yes	**	0.0072					0:PCSS1 vs. 10-3:PCSS1	-0.1025	-0,2101 to 0,005151	No	ns	0.0998					0:DIX17 (PMFA2) vs. 0.001:DIX17 (PMFA2)	-0.4004	-0,8142 to 0,01340	No	ns	0.0805
	0:PCSS1 vs. 10-3:PIME4	-0.7171	-1,390 to -0,04464	Yes	*	0.0172															0:DIX17 (PMFA2) vs. 0.001:DIX18 (PMFA1)	-0.5176	-1,190 to 0,1549	No	ns	0.6312					0:PCSS1 vs. 10-3:PIME4	-0.1349	-0,2955 to 0,02572	No	ns	0.3673					0:DIX17 (PMFA2) vs. 0.001:DIX18 (PMFA1)	0.9855	0,3680 to 1,603	Yes	****	<0,0001
	0:PCSS1 vs. 10-3:PHPF1	-1.184	-1,856 to -0,5115	Yes	****	<0,0001															0:DIX17 (PMFA2) vs. 0.001:DIX19 (PAGA2)	-0.8148	-1,487 to -0,1423	Yes	**	0.0012					0:PCSS1 vs. 10-3:PHPF1	-0.01274	-0,1734 to 0,1479	No	ns	>0,9999					0:DIX17 (PMFA2) vs. 0.001:DIX19 (PAGA2)	0.9574	0,3399 to 1,575	Yes	****	<0,0001
	0:PCSS1 vs. 10-3:PYCL076W	-1.364	-2,036 to -0,6911	Yes	****	<0,0001															0:DIX17 (PMFA2) vs. 0.001:DIX20 (PYCL076W)	-1.068	-1,741 to -0,3958	Yes	****	<0,0001					0:PCSS1 vs. 10-3:PYCL076W	-0.1031	-0,2637 to 0,05751	No	ns	0.9625					0:DIX17 (PMFA2) vs. 0.001:DIX20 (PYCL076W)	1.614	0,9961 to 2,231	Yes	****	<0,0001
	0:PCSS1 vs. 10-3:PMFA1	-1.929	-2,602 to -1,257	Yes	****	<0,0001															0:DIX17 (PMFA2) vs. 0.001:DIX21 (PIME4)	-0.439	-1,112 to 0,2335	No	ns	0.9499					0:PCSS1 vs. 10-3:PMFA1	-0.04069	-0,2013 to 0,1199	No	ns	>0,9999					0:DIX17 (PMFA2) vs. 0.001:DIX21 (PIME4)	2.292	1,674 to 2,909	Yes	****	<0,0001
	0:PCSS1 vs. 10-3:PFIG1	-1.642	-2,314 to -0,9692	Yes	****	<0,0001															0:DIX17 (PMFA2) vs. 0.001:DIX22 (PHPF1)	0.2995	-0,3730 to 0,9720	No	ns	>0,9999					0:PCSS1 vs. 10-3:PFIG1	-0.146	-0,3066 to 0,01462	No	ns	0.1745					0:DIX17 (PMFA2) vs. 0.001:DIX22 (PHPF1)	1.703	1,085 to 2,320	Yes	****	<0,0001
	0:PCSS1 vs. 10-3:PAGA2	-1.988	-2,660 to -1,315	Yes	****	<0,0001															0:DIX17 (PMFA2) vs. 0.001:DIX23 (PCSS1)	0.1505	-0,5220 to 0,8230	No	ns	>0,9999					0:PCSS1 vs. 10-3:PAGA2	-0.07098	-0,2316 to 0,08965	No	ns	>0,9999					0:DIX17 (PMFA2) vs. 0.001:DIX23 (PCSS1)	2.474	1,856 to 3,091	Yes	****	<0,0001
	0:PCSS1 vs. 10-3:PFUS1	-2.183	-2,856 to -1,511	Yes	****	<0,0001															0:DIX17 (PMFA2) vs. 0.001:DIX24 (PFUS1)	-1.306	-1,979 to -0,6340	Yes	****	<0,0001					0:PCSS1 vs. 10-3:PFUS1	-0.156	-0,3167 to 0,004586	No	ns	0.0762					0:DIX17 (PMFA2) vs. 0.001:DIX24 (PFUS1)	0.8468	0,2293 to 1,464	Yes	****	<0,0001
	0:PCSS1 vs. 10-3:PMFA2	-3.31	-3,982 to -2,637	Yes	****	<0,0001															0:DIX17 (PMFA2) vs. 0.001:DIX25 (PFIG1)	-1.231	-1,903 to -0,5585	Yes	****	<0,0001					0:PCSS1 vs. 10-3:PMFA2	-0.03519	-0,1958 to 0,1254	No	ns	>0,9999					0:DIX17 (PMFA2) vs. 0.001:DIX25 (PFIG1)	1.378	0,7609 to 1,996	Yes	****	<0,0001
	0:PCSS1 vs. 10-2:PCSS1	-1.191	-1,641 to -0,7400	Yes	****	<0,0001															0:DIX17 (PMFA2) vs. 0.01:DIX17 (PMFA2)	-1.191	-1,641 to -0,7400	Yes	****	<0,0001					0:PCSS1 vs. 10-2:PCSS1	-0.4095	-0,5171 to -0,3019	Yes	****	<0,0001					0:DIX17 (PMFA2) vs. 0.01:DIX17 (PMFA2)	-0.7811	-1,195 to -0,3673	Yes	****	<0,0001
	0:PCSS1 vs. 10-2:PIME4	-1.405	-2,077 to -0,7324	Yes	****	<0,0001															0:DIX17 (PMFA2) vs. 0.01:DIX18 (PMFA1)	-1.205	-1,878 to -0,5328	Yes	****	<0,0001					0:PCSS1 vs. 10-2:PIME4	-0.4419	-0,6026 to -0,2813	Yes	****	<0,0001					0:DIX17 (PMFA2) vs. 0.01:DIX18 (PMFA1)	0.6048	-0,01272 to 1,222	No	ns	0.0679
	0:PCSS1 vs. 10-2:PHPF1	-1.872	-2,544 to -1,199	Yes	****	<0,0001															0:DIX17 (PMFA2) vs. 0.01:DIX19 (PAGA2)	-1.503	-2,175 to -0,8300	Yes	****	<0,0001					0:PCSS1 vs. 10-2:PHPF1	-0.3198	-0,4804 to -0,1591	Yes	****	<0,0001					0:DIX17 (PMFA2) vs. 0.01:DIX19 (PAGA2)	0.5767	-0,04078 to 1,194	No	ns	0.1273
	0:PCSS1 vs. 10-2:PYCL076W	-2.051	-2,724 to -1,379	Yes	****	<0,0001															0:DIX17 (PMFA2) vs. 0.01:DIX20 (PYCL076W)	-1.756	-2,429 to -1,084	Yes	****	<0,0001					0:PCSS1 vs. 10-2:PYCL076W	-0.4102	-0,5708 to -0,2495	Yes	****	<0,0001					0:DIX17 (PMFA2) vs. 0.01:DIX20 (PYCL076W)	1.233	0,6154 to 1,850	Yes	****	<0,0001
	0:PCSS1 vs. 10-2:PMFA1	-2.617	-3,289 to -1,944	Yes	****	<0,0001															0:DIX17 (PMFA2) vs. 0.01:DIX21 (PIME4)	-1.127	-1,799 to -0,4543	Yes	****	<0,0001					0:PCSS1 vs. 10-2:PMFA1	-0.3477	-0,5083 to -0,1871	Yes	****	<0,0001					0:DIX17 (PMFA2) vs. 0.01:DIX21 (PIME4)	1.911	1,294 to 2,529	Yes	****	<0,0001
	0:PCSS1 vs. 10-2:PFIG1	-2.329	-3,002 to -1,657	Yes	****	<0,0001															0:DIX17 (PMFA2) vs. 0.01:DIX22 (PHPF1)	-0.3882	-1,061 to 0,2843	No	ns	0.996					0:PCSS1 vs. 10-2:PFIG1	-0.453	-0,6137 to -0,2924	Yes	****	<0,0001					0:DIX17 (PMFA2) vs. 0.01:DIX22 (PHPF1)	1.322	0,7046 to 1,940	Yes	****	<0,0001
	0:PCSS1 vs. 10-2:PAGA2	-2.675	-3,348 to -2,003	Yes	****	<0,0001															0:DIX17 (PMFA2) vs. 0.01:DIX23 (PCSS1)	-0.5372	-1,210 to 0,1353	No	ns	0.5182					0:PCSS1 vs. 10-2:PAGA2	-0.378	-0,5386 to -0,2174	Yes	****	<0,0001					0:DIX17 (PMFA2) vs. 0.01:DIX23 (PCSS1)	2.093	1,475 to 2,711	Yes	****	<0,0001
	0:PCSS1 vs. 10-2:PFUS1	-2.871	-3,543 to -2,199	Yes	****	<0,0001															0:DIX17 (PMFA2) vs. 0.01:DIX24 (PFUS1)	-1.994	-2,667 to -1,322	Yes	****	<0,0001					0:PCSS1 vs. 10-2:PFUS1	-0.4631	-0,6237 to -0,3024	Yes	****	<0,0001					0:DIX17 (PMFA2) vs. 0.01:DIX24 (PFUS1)	0.4661	-0,1514 to 1,084	No	ns	0.6867
	0:PCSS1 vs. 10-2:PMFA2	-3.997	-4,670 to -3,325	Yes	****	<0,0001															0:DIX17 (PMFA2) vs. 0.01:DIX25 (PFIG1)	-1.919	-2,591 to -1,246	Yes	****	<0,0001					0:PCSS1 vs. 10-2:PMFA2	-0.3422	-0,5029 to -0,1816	Yes	****	<0,0001					0:DIX17 (PMFA2) vs. 0.01:DIX25 (PFIG1)	0.9977	0,3802 to 1,615	Yes	****	<0,0001
	0:PCSS1 vs. 10-1:Neg.Con.	-0.7343	-1,538 to 0,06952	No	ns	0.1651															0:DIX17 (PMFA2) vs. 0.1:DIX14 (Neg.Con.)	-0.6991	-1,503 to 0,1047	No	ns	0.2728					0:PCSS1 vs. 10-1:Neg.Con.	-0.4498	-0,6417 to -0,2578	Yes	****	<0,0001					0:DIX17 (PMFA2) vs. 0.1:DIX14 (Neg.Con.)	2.59	1,851 to 3,328	Yes	****	<0,0001
	0:PCSS1 vs. 10-1:PPGK1	-3.062	-3,865 to -2,258	Yes	****	<0,0001															0:DIX17 (PMFA2) vs. 0.1:DIX27 (PPGK1)	-0.6922	-1,496 to 0,1116	No	ns	0.2983					0:PCSS1 vs. 10-1:PPGK1	-0.4208	-0,6128 to -0,2288	Yes	****	<0,0001					0:DIX17 (PMFA2) vs. 0.1:DIX27 (PPGK1)	0.2334	-0,5047 to 0,9715	No	ns	>0,9999
	0:PCSS1 vs. 10-1:PTDH3	-4.006	-4,810 to -3,202	Yes	****	<0,0001															0:DIX17 (PMFA2) vs. 0.1:DIX28 (PTDH3)	-0.717	-1,521 to 0,08675	No	ns	0.2131					0:PCSS1 vs. 10-1:PTDH3	-0.4497	-0,6417 to -0,2577	Yes	****	<0,0001					0:DIX17 (PMFA2) vs. 0.1:DIX28 (PTDH3)	-0.6821	-1,420 to 0,05600	No	ns	0.1445
	0:PCSS1 vs. 10-1:PCSS1	-1.317	-1,725 to -0,9097	Yes	****	<0,0001															0:DIX17 (PMFA2) vs. 0.1:DIX17 (PMFA2)	-1.317	-1,725 to -0,9097	Yes	****	<0,0001					0:PCSS1 vs. 10-1:PCSS1	-0.5341	-0,6314 to -0,4367	Yes	****	<0,0001					0:DIX17 (PMFA2) vs. 0.1:DIX17 (PMFA2)	-0.7832	-1,158 to -0,4090	Yes	****	<0,0001
	0:PCSS1 vs. 10-1:PIME4	-1.532	-2,176 to -0,8871	Yes	****	<0,0001															0:DIX17 (PMFA2) vs. 0.1:DIX18 (PMFA1)	-1.332	-1,976 to -0,6875	Yes	****	<0,0001					0:PCSS1 vs. 10-1:PIME4	-0.5665	-0,7204 to -0,4126	Yes	****	<0,0001					0:DIX17 (PMFA2) vs. 0.1:DIX18 (PMFA1)	0.6026	0,01087 to 1,194	Yes	*	0.0376
	0:PCSS1 vs. 10-1:PHPF1	-1.998	-2,643 to -1,354	Yes	****	<0,0001															0:DIX17 (PMFA2) vs. 0.1:DIX19 (PAGA2)	-1.629	-2,274 to -0,9848	Yes	****	<0,0001					0:PCSS1 vs. 10-1:PHPF1	-0.4443	-0,5982 to -0,2904	Yes	****	<0,0001					0:DIX17 (PMFA2) vs. 0.1:DIX19 (PAGA2)	0.5746	-0,01719 to 1,166	No	ns	0.0767
	0:PCSS1 vs. 10-1:PYCL076W	-2.178	-2,822 to -1,534	Yes	****	<0,0001															0:DIX17 (PMFA2) vs. 0.1:DIX20 (PYCL076W)	-1.883	-2,527 to -1,238	Yes	****	<0,0001					0:PCSS1 vs. 10-1:PYCL076W	-0.5347	-0,6886 to -0,3808	Yes	****	<0,0001					0:DIX17 (PMFA2) vs. 0.1:DIX20 (PYCL076W)	1.231	0,6390 to 1,823	Yes	****	<0,0001
	0:PCSS1 vs. 10-1:PMFA1	-2.744	-3,388 to -2,099	Yes	****	<0,0001															0:DIX17 (PMFA2) vs. 0.1:DIX21 (PIME4)	-1.253	-1,898 to -0,6090	Yes	****	<0,0001					0:PCSS1 vs. 10-1:PMFA1	-0.4723	-0,6262 to -0,3183	Yes	****	<0,0001					0:DIX17 (PMFA2) vs. 0.1:DIX21 (PIME4)	1.909	1,317 to 2,501	Yes	****	<0,0001
	0:PCSS1 vs. 10-1:PFIG1	-2.456	-3,101 to -1,812	Yes	****	<0,0001															0:DIX17 (PMFA2) vs. 0.1:DIX22 (PHPF1)	-0.5149	-1,159 to 0,1295	No	ns	0.5175					0:PCSS1 vs. 10-1:PFIG1	-0.5776	-0,7315 to -0,4237	Yes	****	<0,0001					0:DIX17 (PMFA2) vs. 0.1:DIX22 (PHPF1)	1.32	0,7282 to 1,912	Yes	****	<0,0001
	0:PCSS1 vs. 10-1:PAGA2	-2.802	-3,446 to -2,158	Yes	****	<0,0001															0:DIX17 (PMFA2) vs. 0.1:DIX23 (PCSS1)	-0.6639	-1,308 to -0,01946	Yes	*	0.0312					0:PCSS1 vs. 10-1:PAGA2	-0.5026	-0,6565 to -0,3486	Yes	****	<0,0001					0:DIX17 (PMFA2) vs. 0.1:DIX23 (PCSS1)	2.091	1,499 to 2,683	Yes	****	<0,0001
	0:PCSS1 vs. 10-1:PFUS1	-2.998	-3,642 to -2,353	Yes	****	<0,0001															0:DIX17 (PMFA2) vs. 0.1:DIX24 (PFUS1)	-2.121	-2,765 to -1,476	Yes	****	<0,0001					0:PCSS1 vs. 10-1:PFUS1	-0.5876	-0,7415 to -0,4337	Yes	****	<0,0001					0:DIX17 (PMFA2) vs. 0.1:DIX24 (PFUS1)	0.464	-0,1278 to 1,056	No	ns	0.5755
	0:PCSS1 vs. 10-1:PMFA2	-4.124	-4,769 to -3,480	Yes	****	<0,0001															0:DIX17 (PMFA2) vs. 0.1:DIX25 (PFIG1)	-2.045	-2,690 to -1,401	Yes	****	<0,0001					0:PCSS1 vs. 10-1:PMFA2	-0.4668	-0,6207 to -0,3128	Yes	****	<0,0001					0:DIX17 (PMFA2) vs. 0.1:DIX25 (PFIG1)	0.9955	0,4037 to 1,587	Yes	****	<0,0001
	0:PCSS1 vs. 100:PCSS1	-1.48	-1,931 to -1,030	Yes	****	<0,0001															0:DIX17 (PMFA2) vs. 1:DIX17 (PMFA2)	-1.48	-1,931 to -1,030	Yes	****	<0,0001					0:PCSS1 vs. 100:PCSS1	-0.5769	-0,6845 to -0,4693	Yes	****	<0,0001					0:DIX17 (PMFA2) vs. 1:DIX17 (PMFA2)	-0.9034	-1,317 to -0,4896	Yes	****	<0,0001
	0:PCSS1 vs. 100:PIME4	-1.695	-2,367 to -1,022	Yes	****	<0,0001															0:DIX17 (PMFA2) vs. 1:DIX18 (PMFA1)	-1.495	-2,167 to -0,8225	Yes	****	<0,0001					0:PCSS1 vs. 100:PIME4	-0.6093	-0,7700 to -0,4487	Yes	****	<0,0001					0:DIX17 (PMFA2) vs. 1:DIX18 (PMFA1)	0.4825	-0,1350 to 1,100	No	ns	0.5858
	0:PCSS1 vs. 100:PHPF1	-2.161	-2,834 to -1,489	Yes	****	<0,0001															0:DIX17 (PMFA2) vs. 1:DIX19 (PAGA2)	-1.792	-2,465 to -1,120	Yes	****	<0,0001					0:PCSS1 vs. 100:PHPF1	-0.4872	-0,6478 to -0,3265	Yes	****	<0,0001					0:DIX17 (PMFA2) vs. 1:DIX19 (PAGA2)	0.4545	-0,1631 to 1,072	No	ns	0.7536
	0:PCSS1 vs. 100:PYCL076W	-2.341	-3,013 to -1,669	Yes	****	<0,0001															0:DIX17 (PMFA2) vs. 1:DIX20 (PYCL076W)	-2.046	-2,718 to -1,373	Yes	****	<0,0001					0:PCSS1 vs. 100:PYCL076W	-0.5776	-0,7382 to -0,4169	Yes	****	<0,0001					0:DIX17 (PMFA2) vs. 1:DIX20 (PYCL076W)	1.111	0,4931 to 1,728	Yes	****	<0,0001
	0:PCSS1 vs. 100:PMFA1	-2.907	-3,579 to -2,234	Yes	****	<0,0001															0:DIX17 (PMFA2) vs. 1:DIX21 (PIME4)	-1.416	-2,089 to -0,7440	Yes	****	<0,0001					0:PCSS1 vs. 100:PMFA1	-0.5151	-0,6757 to -0,3545	Yes	****	<0,0001					0:DIX17 (PMFA2) vs. 1:DIX21 (PIME4)	1.789	1,171 to 2,406	Yes	****	<0,0001
	0:PCSS1 vs. 100:PFIG1	-2.619	-3,292 to -1,947	Yes	****	<0,0001															0:DIX17 (PMFA2) vs. 1:DIX22 (PHPF1)	-0.6779	-1,350 to -0,005418	Yes	*	0.0442					0:PCSS1 vs. 100:PFIG1	-0.6204	-0,7811 to -0,4598	Yes	****	<0,0001					0:DIX17 (PMFA2) vs. 1:DIX22 (PHPF1)	1.2	0,5823 to 1,817	Yes	****	<0,0001
	0:PCSS1 vs. 100:PAGA2	-2.965	-3,638 to -2,293	Yes	****	<0,0001															0:DIX17 (PMFA2) vs. 1:DIX23 (PCSS1)	-0.8269	-1,499 to -0,1544	Yes	***	0.0008					0:PCSS1 vs. 100:PAGA2	-0.5454	-0,7060 to -0,3848	Yes	****	<0,0001					0:DIX17 (PMFA2) vs. 1:DIX23 (PCSS1)	1.971	1,353 to 2,588	Yes	****	<0,0001
	0:PCSS1 vs. 100:PFUS1	-3.161	-3,833 to -2,488	Yes	****	<0,0001															0:DIX17 (PMFA2) vs. 1:DIX24 (PFUS1)	-2.284	-2,956 to -1,611	Yes	****	<0,0001					0:PCSS1 vs. 100:PFUS1	-0.6305	-0,7911 to -0,4698	Yes	****	<0,0001					0:DIX17 (PMFA2) vs. 1:DIX24 (PFUS1)	0.3439	-0,2737 to 0,9614	No	ns	0.9984
	0:PCSS1 vs. 100:PMFA2	-4.287	-4,960 to -3,615	Yes	****	<0,0001															0:DIX17 (PMFA2) vs. 1:DIX25 (PFIG1)	-2.208	-2,881 to -1,536	Yes	****	<0,0001					0:PCSS1 vs. 100:PMFA2	-0.5096	-0,6703 to -0,3490	Yes	****	<0,0001					0:DIX17 (PMFA2) vs. 1:DIX25 (PFIG1)	0.8754	0,2579 to 1,493	Yes	****	<0,0001
	0:PCSS1 vs. 101:PCSS1	-1.42	-1,870 to -0,9692	Yes	****	<0,0001															0:DIX17 (PMFA2) vs. 10:DIX17 (PMFA2)	-1.42	-1,870 to -0,9692	Yes	****	<0,0001					0:PCSS1 vs. 101:PCSS1	-0.5027	-0,6103 to -0,3950	Yes	****	<0,0001					0:DIX17 (PMFA2) vs. 10:DIX17 (PMFA2)	-0.9171	-1,331 to -0,5033	Yes	****	<0,0001
	0:PCSS1 vs. 101:PIME4	-1.634	-2,307 to -0,9616	Yes	****	<0,0001															0:DIX17 (PMFA2) vs. 10:DIX18 (PMFA1)	-1.434	-2,107 to -0,7620	Yes	****	<0,0001					0:PCSS1 vs. 101:PIME4	-0.5351	-0,6957 to -0,3745	Yes	****	<0,0001					0:DIX17 (PMFA2) vs. 10:DIX18 (PMFA1)	0.4688	-0,1488 to 1,086	No	ns	0.6709
	0:PCSS1 vs. 101:PHPF1	-2.101	-2,773 to -1,428	Yes	****	<0,0001															0:DIX17 (PMFA2) vs. 10:DIX19 (PAGA2)	-1.732	-2,404 to -1,059	Yes	****	<0,0001					0:PCSS1 vs. 101:PHPF1	-0.4129	-0,5735 to -0,2523	Yes	****	<0,0001					0:DIX17 (PMFA2) vs. 10:DIX19 (PAGA2)	0.4407	-0,1768 to 1,058	No	ns	0.8236
	0:PCSS1 vs. 101:PYCL076W	-2.281	-2,953 to -1,608	Yes	****	<0,0001															0:DIX17 (PMFA2) vs. 10:DIX20 (PYCL076W)	-1.985	-2,658 to -1,313	Yes	****	<0,0001					0:PCSS1 vs. 101:PYCL076W	-0.5033	-0,6639 to -0,3427	Yes	****	<0,0001					0:DIX17 (PMFA2) vs. 10:DIX20 (PYCL076W)	1.097	0,4793 to 1,714	Yes	****	<0,0001
	0:PCSS1 vs. 101:PMFA1	-2.846	-3,519 to -2,174	Yes	****	<0,0001															0:DIX17 (PMFA2) vs. 10:DIX21 (PIME4)	-1.356	-2,028 to -0,6835	Yes	****	<0,0001					0:PCSS1 vs. 101:PMFA1	-0.4409	-0,6015 to -0,2802	Yes	****	<0,0001					0:DIX17 (PMFA2) vs. 10:DIX21 (PIME4)	1.775	1,158 to 2,393	Yes	****	<0,0001
	0:PCSS1 vs. 101:PFIG1	-2.559	-3,231 to -1,886	Yes	****	<0,0001															0:DIX17 (PMFA2) vs. 10:DIX22 (PHPF1)	-0.6174	-1,290 to 0,05508	No	ns	0.156					0:PCSS1 vs. 101:PFIG1	-0.5462	-0,7068 to -0,3856	Yes	****	<0,0001					0:DIX17 (PMFA2) vs. 10:DIX22 (PHPF1)	1.186	0,5686 to 1,804	Yes	****	<0,0001
	0:PCSS1 vs. 101:PAGA2	-2.905	-3,577 to -2,232	Yes	****	<0,0001															0:DIX17 (PMFA2) vs. 10:DIX23 (PCSS1)	-0.7664	-1,439 to -0,09390	Yes	**	0.0046					0:PCSS1 vs. 101:PAGA2	-0.4711	-0,6318 to -0,3105	Yes	****	<0,0001					0:DIX17 (PMFA2) vs. 10:DIX23 (PCSS1)	1.957	1,339 to 2,574	Yes	****	<0,0001
	0:PCSS1 vs. 101:PFUS1	-3.1	-3,773 to -2,428	Yes	****	<0,0001															0:DIX17 (PMFA2) vs. 10:DIX24 (PFUS1)	-2.223	-2,896 to -1,551	Yes	****	<0,0001					0:PCSS1 vs. 101:PFUS1	-0.5562	-0,7168 to -0,3956	Yes	****	<0,0001					0:DIX17 (PMFA2) vs. 10:DIX24 (PFUS1)	0.3301	-0,2874 to 0,9476	No	ns	0.9995
	0:PCSS1 vs. 101:PMFA2	-4.227	-4,899 to -3,554	Yes	****	<0,0001															0:DIX17 (PMFA2) vs. 10:DIX25 (PFIG1)	-2.148	-2,820 to -1,475	Yes	****	<0,0001					0:PCSS1 vs. 101:PMFA2	-0.4354	-0,5960 to -0,2747	Yes	****	<0,0001					0:DIX17 (PMFA2) vs. 10:DIX25 (PFIG1)	0.8616	0,2441 to 1,479	Yes	****	<0,0001
	0:PCSS1 vs. 102:Neg.Con.	-0.7722	-1,576 to 0,03160	No	ns	0.0887															0:DIX17 (PMFA2) vs. 100:DIX14 (Neg.Con.)	-0.737	-1,541 to 0,06678	No	ns	0.1583					0:PCSS1 vs. 102:Neg.Con.	-0.4367	-0,6287 to -0,2447	Yes	****	<0,0001					0:DIX17 (PMFA2) vs. 100:DIX14 (Neg.Con.)	2.539	1,801 to 3,277	Yes	****	<0,0001
	0:PCSS1 vs. 102:PPGK1	-3.099	-3,903 to -2,296	Yes	****	<0,0001															0:DIX17 (PMFA2) vs. 100:DIX27 (PPGK1)	-0.7301	-1,534 to 0,07367	No	ns	0.1758					0:PCSS1 vs. 102:PPGK1	-0.4078	-0,5998 to -0,2158	Yes	****	<0,0001					0:DIX17 (PMFA2) vs. 100:DIX27 (PPGK1)	0.1824	-0,5557 to 0,9205	No	ns	>0,9999
	0:PCSS1 vs. 102:PTDH3	-4.044	-4,848 to -3,240	Yes	****	<0,0001															0:DIX17 (PMFA2) vs. 100:DIX28 (PTDH3)	-0.755	-1,559 to 0,04883	No	ns	0.1188					0:PCSS1 vs. 102:PTDH3	-0.4367	-0,6286 to -0,2447	Yes	****	<0,0001					0:DIX17 (PMFA2) vs. 100:DIX28 (PTDH3)	-0.7331	-1,471 to 0,005012	No	ns	0.0554
	0:PCSS1 vs. 102:PCSS1	-1.355	-1,763 to -0,9476	Yes	****	<0,0001															0:DIX17 (PMFA2) vs. 100:DIX17 (PMFA2)	-1.355	-1,763 to -0,9476	Yes	****	<0,0001					0:PCSS1 vs. 102:PCSS1	-0.521	-0,6183 to -0,4236	Yes	****	<0,0001					0:DIX17 (PMFA2) vs. 100:DIX17 (PMFA2)	-0.8342	-1,208 to -0,4600	Yes	****	<0,0001
	0:PCSS1 vs. 102:PIME4	-1.569	-2,214 to -0,9250	Yes	****	<0,0001															0:DIX17 (PMFA2) vs. 100:DIX18 (PMFA1)	-1.37	-2,014 to -0,7255	Yes	****	<0,0001					0:PCSS1 vs. 102:PIME4	-0.5534	-0,7073 to -0,3995	Yes	****	<0,0001					0:DIX17 (PMFA2) vs. 100:DIX18 (PMFA1)	0.5517	-0,04012 to 1,143	No	ns	0.1303
	0:PCSS1 vs. 102:PHPF1	-2.036	-2,681 to -1,392	Yes	****	<0,0001															0:DIX17 (PMFA2) vs. 100:DIX19 (PAGA2)	-1.667	-2,312 to -1,023	Yes	****	<0,0001					0:PCSS1 vs. 102:PHPF1	-0.4312	-0,5852 to -0,2773	Yes	****	<0,0001					0:DIX17 (PMFA2) vs. 100:DIX19 (PAGA2)	0.5236	-0,06818 to 1,115	No	ns	0.2315
	0:PCSS1 vs. 102:PYCL076W	-2.216	-2,860 to -1,571	Yes	****	<0,0001															0:DIX17 (PMFA2) vs. 100:DIX20 (PYCL076W)	-1.921	-2,565 to -1,276	Yes	****	<0,0001					0:PCSS1 vs. 102:PYCL076W	-0.5216	-0,6756 to -0,3677	Yes	****	<0,0001					0:DIX17 (PMFA2) vs. 100:DIX20 (PYCL076W)	1.18	0,5880 to 1,772	Yes	****	<0,0001
	0:PCSS1 vs. 102:PMFA1	-2.782	-3,426 to -2,137	Yes	****	<0,0001															0:DIX17 (PMFA2) vs. 100:DIX21 (PIME4)	-1.291	-1,936 to -0,6469	Yes	****	<0,0001					0:PCSS1 vs. 102:PMFA1	-0.4592	-0,6131 to -0,3053	Yes	****	<0,0001					0:DIX17 (PMFA2) vs. 100:DIX21 (PIME4)	1.858	1,266 to 2,450	Yes	****	<0,0001
	0:PCSS1 vs. 102:PFIG1	-2.494	-3,138 to -1,850	Yes	****	<0,0001															0:DIX17 (PMFA2) vs. 100:DIX22 (PHPF1)	-0.5529	-1,197 to 0,09161	No	ns	0.3085					0:PCSS1 vs. 102:PFIG1	-0.5645	-0,7184 to -0,4106	Yes	****	<0,0001					0:DIX17 (PMFA2) vs. 100:DIX22 (PHPF1)	1.269	0,6772 to 1,861	Yes	****	<0,0001
	0:PCSS1 vs. 102:PAGA2	-2.84	-3,484 to -2,195	Yes	****	<0,0001															0:DIX17 (PMFA2) vs. 100:DIX23 (PCSS1)	-0.7018	-1,346 to -0,05738	Yes	*	0.0116					0:PCSS1 vs. 102:PAGA2	-0.4895	-0,6434 to -0,3356	Yes	****	<0,0001					0:DIX17 (PMFA2) vs. 100:DIX23 (PCSS1)	2.04	1,448 to 2,632	Yes	****	<0,0001
	0:PCSS1 vs. 102:PFUS1	-3.036	-3,680 to -2,391	Yes	****	<0,0001															0:DIX17 (PMFA2) vs. 100:DIX24 (PFUS1)	-2.159	-2,803 to -1,514	Yes	****	<0,0001					0:PCSS1 vs. 102:PFUS1	-0.5746	-0,7285 to -0,4206	Yes	****	<0,0001					0:DIX17 (PMFA2) vs. 100:DIX24 (PFUS1)	0.413	-0,1788 to 1,005	No	ns	0.8659
	0:PCSS1 vs. 102:PMFA2	-4.162	-4,806 to -3,518	Yes	****	<0,0001															0:DIX17 (PMFA2) vs. 100:DIX25 (PFIG1)	-2.083	-2,728 to -1,439	Yes	****	<0,0001					0:PCSS1 vs. 102:PMFA2	-0.4537	-0,6076 to -0,2998	Yes	****	<0,0001					0:DIX17 (PMFA2) vs. 100:DIX25 (PFIG1)	0.9445	0,3528 to 1,536	Yes	****	<0,0001
	0:PIME4 vs. 0:PHPF1	-0.4668	-0,9660 to 0,03237	No	ns	0.1254															0:DIX18 (PMFA1) vs. 0:DIX19 (PAGA2)	-0.2972	-0,7964 to 0,2020	No	ns	0.9917					0:PIME4 vs. 0:PHPF1	0.1222	0,002937 to 0,2414	Yes	*	0.0341					0:DIX18 (PMFA1) vs. 0:DIX19 (PAGA2)	-0.02806	-0,4865 to 0,4303	No	ns	>0,9999
	0:PIME4 vs. 0:PYCL076W	-0.6465	-1,146 to -0,1473	Yes	***	0.0002															0:DIX18 (PMFA1) vs. 0:DIX20 (PYCL076W)	-0.5507	-1,050 to -0,05155	Yes	**	0.009					0:PIME4 vs. 0:PYCL076W	0.03179	-0,08745 to 0,1510	No	ns	>0,9999					0:DIX18 (PMFA1) vs. 0:DIX20 (PYCL076W)	0.6281	0,1697 to 1,086	Yes	****	<0,0001
	0:PIME4 vs. 0:PMFA1	-1.212	-1,711 to -0,7129	Yes	****	<0,0001															0:DIX18 (PMFA1) vs. 0:DIX21 (PIME4)	0.07852	-0,4207 to 0,5777	No	ns	>0,9999					0:PIME4 vs. 0:PMFA1	0.09421	-0,02502 to 0,2134	No	ns	0.5517					0:DIX18 (PMFA1) vs. 0:DIX21 (PIME4)	1.306	0,8479 to 1,765	Yes	****	<0,0001
	0:PIME4 vs. 0:PFIG1	-0.9246	-1,424 to -0,4254	Yes	****	<0,0001															0:DIX18 (PMFA1) vs. 0:DIX22 (PHPF1)	0.8171	0,3179 to 1,316	Yes	****	<0,0001					0:PIME4 vs. 0:PFIG1	-0.0111	-0,1303 to 0,1081	No	ns	>0,9999					0:DIX18 (PMFA1) vs. 0:DIX22 (PHPF1)	0.7173	0,2590 to 1,176	Yes	****	<0,0001
	0:PIME4 vs. 0:PAGA2	-1.27	-1,770 to -0,7713	Yes	****	<0,0001															0:DIX18 (PMFA1) vs. 0:DIX23 (PCSS1)	0.6681	0,1689 to 1,167	Yes	****	<0,0001					0:PIME4 vs. 0:PAGA2	0.06393	-0,05530 to 0,1832	No	ns	0.9994					0:DIX18 (PMFA1) vs. 0:DIX23 (PCSS1)	1.488	1,030 to 1,947	Yes	****	<0,0001
	0:PIME4 vs. 0:PFUS1	-1.466	-1,965 to -0,9669	Yes	****	<0,0001															0:DIX18 (PMFA1) vs. 0:DIX24 (PFUS1)	-0.7889	-1,288 to -0,2897	Yes	****	<0,0001					0:PIME4 vs. 0:PFUS1	-0.02113	-0,1404 to 0,09810	No	ns	>0,9999					0:DIX18 (PMFA1) vs. 0:DIX24 (PFUS1)	-0.1387	-0,5971 to 0,3197	No	ns	>0,9999
	0:PIME4 vs. 0:PMFA2	-2.593	-3,092 to -2,093	Yes	****	<0,0001															0:DIX18 (PMFA1) vs. 0:DIX25 (PFIG1)	-0.7134	-1,213 to -0,2142	Yes	****	<0,0001					0:PIME4 vs. 0:PMFA2	0.09971	-0,01952 to 0,2189	No	ns	0.3797					0:DIX18 (PMFA1) vs. 0:DIX25 (PFIG1)	0.3929	-0,06551 to 0,8513	No	ns	0.3109
	0:PIME4 vs. 10-4:PCSS1	0.2967	-0,3758 to 0,9692	No	ns	>0,9999															0:DIX18 (PMFA1) vs. 0.0001:DIX17 (PMFA2)	0.09713	-0,5754 to 0,7696	No	ns	>0,9999					0:PIME4 vs. 10-4:PCSS1	0.05678	-0,1038 to 0,2174	No	ns	>0,9999					0:DIX18 (PMFA1) vs. 0.0001:DIX17 (PMFA2)	-1.328	-1,945 to -0,7103	Yes	****	<0,0001
	0:PIME4 vs. 10-4:PIME4	0.08242	-0,3682 to 0,5330	No	ns	>0,9999															0:DIX18 (PMFA1) vs. 0.0001:DIX18 (PMFA1)	0.08242	-0,3682 to 0,5330	No	ns	>0,9999					0:PIME4 vs. 10-4:PIME4	0.02435	-0,08328 to 0,1320	No	ns	>0,9999					0:DIX18 (PMFA1) vs. 0.0001:DIX18 (PMFA1)	0.05807	-0,3557 to 0,4718	No	ns	>0,9999
	0:PIME4 vs. 10-4:PHPF1	-0.3844	-1,057 to 0,2881	No	ns	0.9969															0:DIX18 (PMFA1) vs. 0.0001:DIX19 (PAGA2)	-0.2148	-0,8873 to 0,4577	No	ns	>0,9999					0:PIME4 vs. 10-4:PHPF1	0.1465	-0,01410 to 0,3071	No	ns	0.1678					0:DIX18 (PMFA1) vs. 0.0001:DIX19 (PAGA2)	0.03001	-0,5875 to 0,6475	No	ns	>0,9999
	0:PIME4 vs. 10-4:PYCL076W	-0.564	-1,237 to 0,1084	No	ns	0.3712															0:DIX18 (PMFA1) vs. 0.0001:DIX20 (PYCL076W)	-0.4683	-1,141 to 0,2042	No	ns	0.8696					0:PIME4 vs. 10-4:PYCL076W	0.05614	-0,1045 to 0,2168	No	ns	>0,9999					0:DIX18 (PMFA1) vs. 0.0001:DIX20 (PYCL076W)	0.6862	0,06863 to 1,304	Yes	**	0.0078
	0:PIME4 vs. 10-4:PMFA1	-1.13	-1,802 to -0,4572	Yes	****	<0,0001															0:DIX18 (PMFA1) vs. 0.0001:DIX21 (PIME4)	0.1609	-0,5115 to 0,8334	No	ns	>0,9999					0:PIME4 vs. 10-4:PMFA1	0.1186	-0,04206 to 0,2792	No	ns	0.7461					0:DIX18 (PMFA1) vs. 0.0001:DIX21 (PIME4)	1.364	0,7469 to 1,982	Yes	****	<0,0001
	0:PIME4 vs. 10-4:PFIG1	-0.8421	-1,515 to -0,1696	Yes	***	0.0005															0:DIX18 (PMFA1) vs. 0.0001:DIX22 (PHPF1)	0.8995	0,2270 to 1,572	Yes	****	<0,0001					0:PIME4 vs. 10-4:PFIG1	0.01325	-0,1474 to 0,1739	No	ns	>0,9999					0:DIX18 (PMFA1) vs. 0.0001:DIX22 (PHPF1)	0.7754	0,1579 to 1,393	Yes	***	0.0005
	0:PIME4 vs. 10-4:PAGA2	-1.188	-1,861 to -0,5156	Yes	****	<0,0001															0:DIX18 (PMFA1) vs. 0.0001:DIX23 (PCSS1)	0.7505	0,07802 to 1,423	Yes	**	0.0072					0:PIME4 vs. 10-4:PAGA2	0.08828	-0,07234 to 0,2489	No	ns	0.9989					0:DIX18 (PMFA1) vs. 0.0001:DIX23 (PCSS1)	1.546	0,9287 to 2,164	Yes	****	<0,0001
	0:PIME4 vs. 10-4:PFUS1	-1.384	-2,056 to -0,7112	Yes	****	<0,0001															0:DIX18 (PMFA1) vs. 0.0001:DIX24 (PFUS1)	-0.7065	-1,379 to -0,03399	Yes	*	0.0224					0:PIME4 vs. 10-4:PFUS1	0.003218	-0,1574 to 0,1638	No	ns	>0,9999					0:DIX18 (PMFA1) vs. 0.0001:DIX24 (PFUS1)	-0.0806	-0,6981 to 0,5369	No	ns	>0,9999
	0:PIME4 vs. 10-4:PMFA2	-2.51	-3,183 to -1,838	Yes	****	<0,0001															0:DIX18 (PMFA1) vs. 0.0001:DIX25 (PFIG1)	-0.631	-1,303 to 0,04151	No	ns	0.1203					0:PIME4 vs. 10-4:PMFA2	0.1241	-0,03656 to 0,2847	No	ns	0.6206					0:DIX18 (PMFA1) vs. 0.0001:DIX25 (PFIG1)	0.4509	-0,1666 to 1,068	No	ns	0.7725
	0:PIME4 vs. 10-3:PCSS1	-0.2886	-0,9611 to 0,3839	No	ns	>0,9999															0:DIX18 (PMFA1) vs. 0.001:DIX17 (PMFA2)	-0.4881	-1,161 to 0,1843	No	ns	0.7866					0:PIME4 vs. 10-3:PCSS1	-0.07005	-0,2307 to 0,09058	No	ns	>0,9999					0:DIX18 (PMFA1) vs. 0.001:DIX17 (PMFA2)	-1.786	-2,404 to -1,169	Yes	****	<0,0001
	0:PIME4 vs. 10-3:PIME4	-0.5029	-0,9535 to -0,05224	Yes	**	0.0072															0:DIX18 (PMFA1) vs. 0.001:DIX18 (PMFA1)	-0.5029	-0,9535 to -0,05224	Yes	**	0.0072					0:PIME4 vs. 10-3:PIME4	-0.1025	-0,2101 to 0,005151	No	ns	0.0998					0:DIX18 (PMFA1) vs. 0.001:DIX18 (PMFA1)	-0.4004	-0,8142 to 0,01340	No	ns	0.0805
	0:PIME4 vs. 10-3:PHPF1	-0.9697	-1,642 to -0,2972	Yes	****	<0,0001															0:DIX18 (PMFA1) vs. 0.001:DIX19 (PAGA2)	-0.8001	-1,473 to -0,1276	Yes	**	0.0018					0:PIME4 vs. 10-3:PHPF1	0.01969	-0,1409 to 0,1803	No	ns	>0,9999					0:DIX18 (PMFA1) vs. 0.001:DIX19 (PAGA2)	-0.4284	-1,046 to 0,1891	No	ns	0.8758
	0:PIME4 vs. 10-3:PYCL076W	-1.149	-1,822 to -0,4768	Yes	****	<0,0001															0:DIX18 (PMFA1) vs. 0.001:DIX20 (PYCL076W)	-1.054	-1,726 to -0,3811	Yes	****	<0,0001					0:PIME4 vs. 10-3:PYCL076W	-0.07069	-0,2313 to 0,08993	No	ns	>0,9999					0:DIX18 (PMFA1) vs. 0.001:DIX20 (PYCL076W)	0.2277	-0,3898 to 0,8452	No	ns	>0,9999
	0:PIME4 vs. 10-3:PMFA1	-1.715	-2,387 to -1,042	Yes	****	<0,0001															0:DIX18 (PMFA1) vs. 0.001:DIX21 (PIME4)	-0.4243	-1,097 to 0,2482	No	ns	0.9726					0:PIME4 vs. 10-3:PMFA1	-0.008263	-0,1689 to 0,1524	No	ns	>0,9999					0:DIX18 (PMFA1) vs. 0.001:DIX21 (PIME4)	0.906	0,2884 to 1,523	Yes	****	<0,0001
	0:PIME4 vs. 10-3:PFIG1	-1.427	-2,100 to -0,7549	Yes	****	<0,0001															0:DIX18 (PMFA1) vs. 0.001:DIX22 (PHPF1)	0.3142	-0,3583 to 0,9867	No	ns	>0,9999					0:PIME4 vs. 10-3:PFIG1	-0.1136	-0,2742 to 0,04705	No	ns	0.842					0:DIX18 (PMFA1) vs. 0.001:DIX22 (PHPF1)	0.317	-0,3006 to 0,9345	No	ns	0.9999
	0:PIME4 vs. 10-3:PAGA2	-1.773	-2,446 to -1,101	Yes	****	<0,0001															0:DIX18 (PMFA1) vs. 0.001:DIX23 (PCSS1)	0.1652	-0,5073 to 0,8377	No	ns	>0,9999					0:PIME4 vs. 10-3:PAGA2	-0.03855	-0,1992 to 0,1221	No	ns	>0,9999					0:DIX18 (PMFA1) vs. 0.001:DIX23 (PCSS1)	1.088	0,4703 to 1,705	Yes	****	<0,0001
	0:PIME4 vs. 10-3:PFUS1	-1.969	-2,641 to -1,297	Yes	****	<0,0001															0:DIX18 (PMFA1) vs. 0.001:DIX24 (PFUS1)	-1.292	-1,964 to -0,6193	Yes	****	<0,0001					0:PIME4 vs. 10-3:PFUS1	-0.1236	-0,2842 to 0,03701	No	ns	0.6314					0:DIX18 (PMFA1) vs. 0.001:DIX24 (PFUS1)	-0.539	-1,157 to 0,07848	No	ns	0.2637
	0:PIME4 vs. 10-3:PMFA2	-3.095	-3,768 to -2,423	Yes	****	<0,0001															0:DIX18 (PMFA1) vs. 0.001:DIX25 (PFIG1)	-1.216	-1,889 to -0,5438	Yes	****	<0,0001					0:PIME4 vs. 10-3:PMFA2	-0.002765	-0,1634 to 0,1579	No	ns	>0,9999					0:DIX18 (PMFA1) vs. 0.001:DIX25 (PFIG1)	-0.007497	-0,6250 to 0,6100	No	ns	>0,9999
	0:PIME4 vs. 10-2:PCSS1	-0.9763	-1,649 to -0,3038	Yes	****	<0,0001															0:DIX18 (PMFA1) vs. 0.01:DIX17 (PMFA2)	-1.176	-1,848 to -0,5034	Yes	****	<0,0001					0:PIME4 vs. 10-2:PCSS1	-0.3771	-0,5377 to -0,2165	Yes	****	<0,0001					0:DIX18 (PMFA1) vs. 0.01:DIX17 (PMFA2)	-2.167	-2,784 to -1,549	Yes	****	<0,0001
	0:PIME4 vs. 10-2:PIME4	-1.191	-1,641 to -0,7400	Yes	****	<0,0001															0:DIX18 (PMFA1) vs. 0.01:DIX18 (PMFA1)	-1.191	-1,641 to -0,7400	Yes	****	<0,0001					0:PIME4 vs. 10-2:PIME4	-0.4095	-0,5171 to -0,3019	Yes	****	<0,0001					0:DIX18 (PMFA1) vs. 0.01:DIX18 (PMFA1)	-0.7811	-1,195 to -0,3673	Yes	****	<0,0001
	0:PIME4 vs. 10-2:PHPF1	-1.657	-2,330 to -0,9849	Yes	****	<0,0001															0:DIX18 (PMFA1) vs. 0.01:DIX19 (PAGA2)	-1.488	-2,160 to -0,8153	Yes	****	<0,0001					0:PIME4 vs. 10-2:PHPF1	-0.2873	-0,4480 to -0,1267	Yes	****	<0,0001					0:DIX18 (PMFA1) vs. 0.01:DIX19 (PAGA2)	-0.8091	-1,427 to -0,1916	Yes	***	0.0001
	0:PIME4 vs. 10-2:PYCL076W	-1.837	-2,510 to -1,165	Yes	****	<0,0001															0:DIX18 (PMFA1) vs. 0.01:DIX20 (PYCL076W)	-1.741	-2,414 to -1,069	Yes	****	<0,0001					0:PIME4 vs. 10-2:PYCL076W	-0.3777	-0,5383 to -0,2171	Yes	****	<0,0001					0:DIX18 (PMFA1) vs. 0.01:DIX20 (PYCL076W)	-0.153	-0,7705 to 0,4645	No	ns	>0,9999
	0:PIME4 vs. 10-2:PMFA1	-2.403	-3,075 to -1,730	Yes	****	<0,0001															0:DIX18 (PMFA1) vs. 0.01:DIX21 (PIME4)	-1.112	-1,785 to -0,4396	Yes	****	<0,0001					0:PIME4 vs. 10-2:PMFA1	-0.3153	-0,4759 to -0,1547	Yes	****	<0,0001					0:DIX18 (PMFA1) vs. 0.01:DIX21 (PIME4)	0.5253	-0,09227 to 1,143	No	ns	0.3316
	0:PIME4 vs. 10-2:PFIG1	-2.115	-2,788 to -1,443	Yes	****	<0,0001															0:DIX18 (PMFA1) vs. 0.01:DIX22 (PHPF1)	-0.3735	-1,046 to 0,2990	No	ns	0.9985					0:PIME4 vs. 10-2:PFIG1	-0.4206	-0,5812 to -0,2600	Yes	****	<0,0001					0:DIX18 (PMFA1) vs. 0.01:DIX22 (PHPF1)	-0.06374	-0,6813 to 0,5538	No	ns	>0,9999
	0:PIME4 vs. 10-2:PAGA2	-2.461	-3,134 to -1,789	Yes	****	<0,0001															0:DIX18 (PMFA1) vs. 0.01:DIX23 (PCSS1)	-0.5225	-1,195 to 0,1500	No	ns	0.6029					0:PIME4 vs. 10-2:PAGA2	-0.3456	-0,5062 to -0,1850	Yes	****	<0,0001					0:DIX18 (PMFA1) vs. 0.01:DIX23 (PCSS1)	0.7071	0,08958 to 1,325	Yes	**	0.0042
	0:PIME4 vs. 10-2:PFUS1	-2.657	-3,329 to -1,984	Yes	****	<0,0001															0:DIX18 (PMFA1) vs. 0.01:DIX24 (PFUS1)	-1.979	-2,652 to -1,307	Yes	****	<0,0001					0:PIME4 vs. 10-2:PFUS1	-0.4306	-0,5913 to -0,2700	Yes	****	<0,0001					0:DIX18 (PMFA1) vs. 0.01:DIX24 (PFUS1)	-0.9198	-1,537 to -0,3022	Yes	****	<0,0001
	0:PIME4 vs. 10-2:PMFA2	-3.783	-4,456 to -3,111	Yes	****	<0,0001															0:DIX18 (PMFA1) vs. 0.01:DIX25 (PFIG1)	-1.904	-2,576 to -1,232	Yes	****	<0,0001					0:PIME4 vs. 10-2:PMFA2	-0.3098	-0,4704 to -0,1492	Yes	****	<0,0001					0:DIX18 (PMFA1) vs. 0.01:DIX25 (PFIG1)	-0.3882	-1,006 to 0,2293	No	ns	0.9745
	0:PIME4 vs. 10-1:Neg.Con.	-0.52	-1,324 to 0,2838	No	ns	0.9571															0:DIX18 (PMFA1) vs. 0.1:DIX14 (Neg.Con.)	-0.6844	-1,488 to 0,1194	No	ns	0.3288					0:PIME4 vs. 10-1:Neg.Con.	-0.4173	-0,6093 to -0,2254	Yes	****	<0,0001					0:DIX18 (PMFA1) vs. 0.1:DIX14 (Neg.Con.)	1.204	0,4656 to 1,942	Yes	****	<0,0001
	0:PIME4 vs. 10-1:PPGK1	-2.847	-3,651 to -2,043	Yes	****	<0,0001															0:DIX18 (PMFA1) vs. 0.1:DIX27 (PPGK1)	-0.6775	-1,481 to 0,1263	No	ns	0.3571					0:PIME4 vs. 10-1:PPGK1	-0.3884	-0,5804 to -0,1964	Yes	****	<0,0001					0:DIX18 (PMFA1) vs. 0.1:DIX27 (PPGK1)	-1.153	-1,891 to -0,4144	Yes	****	<0,0001
	0:PIME4 vs. 10-1:PTDH3	-3.792	-4,595 to -2,988	Yes	****	<0,0001															0:DIX18 (PMFA1) vs. 0.1:DIX28 (PTDH3)	-0.7023	-1,506 to 0,1015	No	ns	0.2613					0:PIME4 vs. 10-1:PTDH3	-0.4173	-0,6093 to -0,2253	Yes	****	<0,0001					0:DIX18 (PMFA1) vs. 0.1:DIX28 (PTDH3)	-2.068	-2,806 to -1,330	Yes	****	<0,0001
	0:PIME4 vs. 10-1:PCSS1	-1.103	-1,747 to -0,4586	Yes	****	<0,0001															0:DIX18 (PMFA1) vs. 0.1:DIX17 (PMFA2)	-1.303	-1,947 to -0,6581	Yes	****	<0,0001					0:PIME4 vs. 10-1:PCSS1	-0.5016	-0,6556 to -0,3477	Yes	****	<0,0001					0:DIX18 (PMFA1) vs. 0.1:DIX17 (PMFA2)	-2.169	-2,761 to -1,577	Yes	****	<0,0001
	0:PIME4 vs. 10-1:PIME4	-1.317	-1,725 to -0,9097	Yes	****	<0,0001															0:DIX18 (PMFA1) vs. 0.1:DIX18 (PMFA1)	-1.317	-1,725 to -0,9097	Yes	****	<0,0001					0:PIME4 vs. 10-1:PIME4	-0.5341	-0,6314 to -0,4367	Yes	****	<0,0001					0:DIX18 (PMFA1) vs. 0.1:DIX18 (PMFA1)	-0.7832	-1,158 to -0,4090	Yes	****	<0,0001
	0:PIME4 vs. 10-1:PHPF1	-1.784	-2,429 to -1,140	Yes	****	<0,0001															0:DIX18 (PMFA1) vs. 0.1:DIX19 (PAGA2)	-1.615	-2,259 to -0,9701	Yes	****	<0,0001					0:PIME4 vs. 10-1:PHPF1	-0.4119	-0,5658 to -0,2580	Yes	****	<0,0001					0:DIX18 (PMFA1) vs. 0.1:DIX19 (PAGA2)	-0.8113	-1,403 to -0,2195	Yes	****	<0,0001
	0:PIME4 vs. 10-1:PYCL076W	-1.964	-2,608 to -1,319	Yes	****	<0,0001															0:DIX18 (PMFA1) vs. 0.1:DIX20 (PYCL076W)	-1.868	-2,512 to -1,224	Yes	****	<0,0001					0:PIME4 vs. 10-1:PYCL076W	-0.5023	-0,6562 to -0,3483	Yes	****	<0,0001					0:DIX18 (PMFA1) vs. 0.1:DIX20 (PYCL076W)	-0.1552	-0,7469 to 0,4366	No	ns	>0,9999
	0:PIME4 vs. 10-1:PMFA1	-2.529	-3,174 to -1,885	Yes	****	<0,0001															0:DIX18 (PMFA1) vs. 0.1:DIX21 (PIME4)	-1.239	-1,883 to -0,5943	Yes	****	<0,0001					0:PIME4 vs. 10-1:PMFA1	-0.4398	-0,5938 to -0,2859	Yes	****	<0,0001					0:DIX18 (PMFA1) vs. 0.1:DIX21 (PIME4)	0.5231	-0,06868 to 1,115	No	ns	0.2337
	0:PIME4 vs. 10-1:PFIG1	-2.242	-2,886 to -1,597	Yes	****	<0,0001															0:DIX18 (PMFA1) vs. 0.1:DIX22 (PHPF1)	-0.5002	-1,145 to 0,1442	No	ns	0.6059					0:PIME4 vs. 10-1:PFIG1	-0.5452	-0,6991 to -0,3912	Yes	****	<0,0001					0:DIX18 (PMFA1) vs. 0.1:DIX22 (PHPF1)	-0.0659	-0,6577 to 0,5259	No	ns	>0,9999
	0:PIME4 vs. 10-1:PAGA2	-2.588	-3,232 to -1,943	Yes	****	<0,0001															0:DIX18 (PMFA1) vs. 0.1:DIX23 (PCSS1)	-0.6492	-1,294 to -0,004754	Yes	*	0.0447					0:PIME4 vs. 10-1:PAGA2	-0.4701	-0,6241 to -0,3162	Yes	****	<0,0001					0:DIX18 (PMFA1) vs. 0.1:DIX23 (PCSS1)	0.7049	0,1132 to 1,297	Yes	**	0.0017
	0:PIME4 vs. 10-1:PFUS1	-2.783	-3,428 to -2,139	Yes	****	<0,0001															0:DIX18 (PMFA1) vs. 0.1:DIX24 (PFUS1)	-2.106	-2,751 to -1,462	Yes	****	<0,0001					0:PIME4 vs. 10-1:PFUS1	-0.5552	-0,7091 to -0,4013	Yes	****	<0,0001					0:DIX18 (PMFA1) vs. 0.1:DIX24 (PFUS1)	-0.9219	-1,514 to -0,3301	Yes	****	<0,0001
	0:PIME4 vs. 10-1:PMFA2	-3.91	-4,554 to -3,265	Yes	****	<0,0001															0:DIX18 (PMFA1) vs. 0.1:DIX25 (PFIG1)	-2.031	-2,675 to -1,386	Yes	****	<0,0001					0:PIME4 vs. 10-1:PMFA2	-0.4343	-0,5883 to -0,2804	Yes	****	<0,0001					0:DIX18 (PMFA1) vs. 0.1:DIX25 (PFIG1)	-0.3904	-0,9821 to 0,2014	No	ns	0.9406
	0:PIME4 vs. 100:PCSS1	-1.266	-1,938 to -0,5935	Yes	****	<0,0001															0:DIX18 (PMFA1) vs. 1:DIX17 (PMFA2)	-1.466	-2,138 to -0,7931	Yes	****	<0,0001					0:PIME4 vs. 100:PCSS1	-0.5445	-0,7051 to -0,3839	Yes	****	<0,0001					0:DIX18 (PMFA1) vs. 1:DIX17 (PMFA2)	-2.289	-2,907 to -1,672	Yes	****	<0,0001
	0:PIME4 vs. 100:PIME4	-1.48	-1,931 to -1,030	Yes	****	<0,0001															0:DIX18 (PMFA1) vs. 1:DIX18 (PMFA1)	-1.48	-1,931 to -1,030	Yes	****	<0,0001					0:PIME4 vs. 100:PIME4	-0.5769	-0,6845 to -0,4693	Yes	****	<0,0001					0:DIX18 (PMFA1) vs. 1:DIX18 (PMFA1)	-0.9034	-1,317 to -0,4896	Yes	****	<0,0001
	0:PIME4 vs. 100:PHPF1	-1.947	-2,620 to -1,275	Yes	****	<0,0001															0:DIX18 (PMFA1) vs. 1:DIX19 (PAGA2)	-1.777	-2,450 to -1,105	Yes	****	<0,0001					0:PIME4 vs. 100:PHPF1	-0.4547	-0,6154 to -0,2941	Yes	****	<0,0001					0:DIX18 (PMFA1) vs. 1:DIX19 (PAGA2)	-0.9314	-1,549 to -0,3139	Yes	****	<0,0001
	0:PIME4 vs. 100:PYCL076W	-2.127	-2,799 to -1,454	Yes	****	<0,0001															0:DIX18 (PMFA1) vs. 1:DIX20 (PYCL076W)	-2.031	-2,704 to -1,359	Yes	****	<0,0001					0:PIME4 vs. 100:PYCL076W	-0.5451	-0,7057 to -0,3845	Yes	****	<0,0001					0:DIX18 (PMFA1) vs. 1:DIX20 (PYCL076W)	-0.2753	-0,8928 to 0,3422	No	ns	>0,9999
	0:PIME4 vs. 100:PMFA1	-2.692	-3,365 to -2,020	Yes	****	<0,0001															0:DIX18 (PMFA1) vs. 1:DIX21 (PIME4)	-1.402	-2,074 to -0,7293	Yes	****	<0,0001					0:PIME4 vs. 100:PMFA1	-0.4827	-0,6433 to -0,3221	Yes	****	<0,0001					0:DIX18 (PMFA1) vs. 1:DIX21 (PIME4)	0.403	-0,2145 to 1,020	No	ns	0.9503
	0:PIME4 vs. 100:PFIG1	-2.405	-3,077 to -1,732	Yes	****	<0,0001															0:DIX18 (PMFA1) vs. 1:DIX22 (PHPF1)	-0.6632	-1,336 to 0,009288	No	ns	0.0615					0:PIME4 vs. 100:PFIG1	-0.588	-0,7486 to -0,4274	Yes	****	<0,0001					0:DIX18 (PMFA1) vs. 1:DIX22 (PHPF1)	-0.186	-0,8035 to 0,4315	No	ns	>0,9999
	0:PIME4 vs. 100:PAGA2	-2.751	-3,423 to -2,078	Yes	****	<0,0001															0:DIX18 (PMFA1) vs. 1:DIX23 (PCSS1)	-0.8122	-1,485 to -0,1397	Yes	**	0.0012					0:PIME4 vs. 100:PAGA2	-0.513	-0,6736 to -0,3524	Yes	****	<0,0001					0:DIX18 (PMFA1) vs. 1:DIX23 (PCSS1)	0.5848	-0,03270 to 1,202	No	ns	0.107
	0:PIME4 vs. 100:PFUS1	-2.946	-3,619 to -2,274	Yes	****	<0,0001															0:DIX18 (PMFA1) vs. 1:DIX24 (PFUS1)	-2.269	-2,942 to -1,597	Yes	****	<0,0001					0:PIME4 vs. 100:PFUS1	-0.598	-0,7587 to -0,4374	Yes	****	<0,0001					0:DIX18 (PMFA1) vs. 1:DIX24 (PFUS1)	-1.042	-1,660 to -0,4245	Yes	****	<0,0001
	0:PIME4 vs. 100:PMFA2	-4.073	-4,745 to -3,400	Yes	****	<0,0001															0:DIX18 (PMFA1) vs. 1:DIX25 (PFIG1)	-2.194	-2,866 to -1,521	Yes	****	<0,0001					0:PIME4 vs. 100:PMFA2	-0.4772	-0,6378 to -0,3166	Yes	****	<0,0001					0:DIX18 (PMFA1) vs. 1:DIX25 (PFIG1)	-0.5105	-1,128 to 0,1070	No	ns	0.4138
	0:PIME4 vs. 101:PCSS1	-1.205	-1,878 to -0,5330	Yes	****	<0,0001															0:DIX18 (PMFA1) vs. 10:DIX17 (PMFA2)	-1.405	-2,078 to -0,7326	Yes	****	<0,0001					0:PIME4 vs. 101:PCSS1	-0.4702	-0,6308 to -0,3096	Yes	****	<0,0001					0:DIX18 (PMFA1) vs. 10:DIX17 (PMFA2)	-2.303	-2,921 to -1,685	Yes	****	<0,0001
	0:PIME4 vs. 101:PIME4	-1.42	-1,870 to -0,9692	Yes	****	<0,0001															0:DIX18 (PMFA1) vs. 10:DIX18 (PMFA1)	-1.42	-1,870 to -0,9692	Yes	****	<0,0001					0:PIME4 vs. 101:PIME4	-0.5027	-0,6103 to -0,3950	Yes	****	<0,0001					0:DIX18 (PMFA1) vs. 10:DIX18 (PMFA1)	-0.9171	-1,331 to -0,5033	Yes	****	<0,0001
	0:PIME4 vs. 101:PHPF1	-1.887	-2,559 to -1,214	Yes	****	<0,0001															0:DIX18 (PMFA1) vs. 10:DIX19 (PAGA2)	-1.717	-2,389 to -1,044	Yes	****	<0,0001					0:PIME4 vs. 101:PHPF1	-0.3805	-0,5411 to -0,2199	Yes	****	<0,0001					0:DIX18 (PMFA1) vs. 10:DIX19 (PAGA2)	-0.9452	-1,563 to -0,3277	Yes	****	<0,0001
	0:PIME4 vs. 101:PYCL076W	-2.066	-2,739 to -1,394	Yes	****	<0,0001															0:DIX18 (PMFA1) vs. 10:DIX20 (PYCL076W)	-1.971	-2,643 to -1,298	Yes	****	<0,0001					0:PIME4 vs. 101:PYCL076W	-0.4709	-0,6315 to -0,3102	Yes	****	<0,0001					0:DIX18 (PMFA1) vs. 10:DIX20 (PYCL076W)	-0.289	-0,9066 to 0,3285	No	ns	>0,9999
	0:PIME4 vs. 101:PMFA1	-2.632	-3,304 to -1,959	Yes	****	<0,0001															0:DIX18 (PMFA1) vs. 10:DIX21 (PIME4)	-1.341	-2,014 to -0,6688	Yes	****	<0,0001					0:PIME4 vs. 101:PMFA1	-0.4084	-0,5691 to -0,2478	Yes	****	<0,0001					0:DIX18 (PMFA1) vs. 10:DIX21 (PIME4)	0.3892	-0,2283 to 1,007	No	ns	0.9732
	0:PIME4 vs. 101:PFIG1	-2.344	-3,017 to -1,672	Yes	****	<0,0001															0:DIX18 (PMFA1) vs. 10:DIX22 (PHPF1)	-0.6027	-1,275 to 0,06979	No	ns	0.2031					0:PIME4 vs. 101:PFIG1	-0.5138	-0,6744 to -0,3531	Yes	****	<0,0001					0:DIX18 (PMFA1) vs. 10:DIX22 (PHPF1)	-0.1998	-0,8173 to 0,4177	No	ns	>0,9999
	0:PIME4 vs. 101:PAGA2	-2.69	-3,363 to -2,018	Yes	****	<0,0001															0:DIX18 (PMFA1) vs. 10:DIX23 (PCSS1)	-0.7517	-1,424 to -0,07920	Yes	**	0.007					0:PIME4 vs. 101:PAGA2	-0.4387	-0,5993 to -0,2781	Yes	****	<0,0001					0:DIX18 (PMFA1) vs. 10:DIX23 (PCSS1)	0.5711	-0,04646 to 1,189	No	ns	0.1434
	0:PIME4 vs. 101:PFUS1	-2.886	-3,558 to -2,213	Yes	****	<0,0001															0:DIX18 (PMFA1) vs. 10:DIX24 (PFUS1)	-2.209	-2,881 to -1,536	Yes	****	<0,0001					0:PIME4 vs. 101:PFUS1	-0.5238	-0,6844 to -0,3632	Yes	****	<0,0001					0:DIX18 (PMFA1) vs. 10:DIX24 (PFUS1)	-1.056	-1,673 to -0,4383	Yes	****	<0,0001
	0:PIME4 vs. 101:PMFA2	-4.012	-4,685 to -3,340	Yes	****	<0,0001															0:DIX18 (PMFA1) vs. 10:DIX25 (PFIG1)	-2.133	-2,806 to -1,461	Yes	****	<0,0001					0:PIME4 vs. 101:PMFA2	-0.4029	-0,5636 to -0,2423	Yes	****	<0,0001					0:DIX18 (PMFA1) vs. 10:DIX25 (PFIG1)	-0.5242	-1,142 to 0,09328	No	ns	0.3369
	0:PIME4 vs. 102:Neg.Con.	-0.5579	-1,362 to 0,2459	No	ns	0.8751															0:DIX18 (PMFA1) vs. 100:DIX14 (Neg.Con.)	-0.7223	-1,526 to 0,08149	No	ns	0.1975					0:PIME4 vs. 102:Neg.Con.	-0.4043	-0,5963 to -0,2123	Yes	****	<0,0001					0:DIX18 (PMFA1) vs. 100:DIX14 (Neg.Con.)	1.153	0,4146 to 1,891	Yes	****	<0,0001
	0:PIME4 vs. 102:PPGK1	-2.885	-3,689 to -2,081	Yes	****	<0,0001															0:DIX18 (PMFA1) vs. 100:DIX27 (PPGK1)	-0.7154	-1,519 to 0,08838	No	ns	0.2181					0:PIME4 vs. 102:PPGK1	-0.3753	-0,5673 to -0,1834	Yes	****	<0,0001					0:DIX18 (PMFA1) vs. 100:DIX27 (PPGK1)	-1.203	-1,942 to -0,4654	Yes	****	<0,0001
	0:PIME4 vs. 102:PTDH3	-3.83	-4,633 to -3,026	Yes	****	<0,0001															0:DIX18 (PMFA1) vs. 100:DIX28 (PTDH3)	-0.7402	-1,544 to 0,06353	No	ns	0.1504					0:PIME4 vs. 102:PTDH3	-0.4042	-0,5962 to -0,2122	Yes	****	<0,0001					0:DIX18 (PMFA1) vs. 100:DIX28 (PTDH3)	-2.119	-2,857 to -1,381	Yes	****	<0,0001
	0:PIME4 vs. 102:PCSS1	-1.141	-1,785 to -0,4965	Yes	****	<0,0001															0:DIX18 (PMFA1) vs. 100:DIX17 (PMFA2)	-1.341	-1,985 to -0,6961	Yes	****	<0,0001					0:PIME4 vs. 102:PCSS1	-0.4886	-0,6425 to -0,3346	Yes	****	<0,0001					0:DIX18 (PMFA1) vs. 100:DIX17 (PMFA2)	-2.22	-2,812 to -1,628	Yes	****	<0,0001
	0:PIME4 vs. 102:PIME4	-1.355	-1,763 to -0,9476	Yes	****	<0,0001															0:DIX18 (PMFA1) vs. 100:DIX18 (PMFA1)	-1.355	-1,763 to -0,9476	Yes	****	<0,0001					0:PIME4 vs. 102:PIME4	-0.521	-0,6183 to -0,4236	Yes	****	<0,0001					0:DIX18 (PMFA1) vs. 100:DIX18 (PMFA1)	-0.8342	-1,208 to -0,4600	Yes	****	<0,0001
	0:PIME4 vs. 102:PHPF1	-1.822	-2,466 to -1,178	Yes	****	<0,0001															0:DIX18 (PMFA1) vs. 100:DIX19 (PAGA2)	-1.652	-2,297 to -1,008	Yes	****	<0,0001					0:PIME4 vs. 102:PHPF1	-0.3988	-0,5528 to -0,2449	Yes	****	<0,0001					0:DIX18 (PMFA1) vs. 100:DIX19 (PAGA2)	-0.8623	-1,454 to -0,2705	Yes	****	<0,0001
	0:PIME4 vs. 102:PYCL076W	-2.002	-2,646 to -1,357	Yes	****	<0,0001															0:DIX18 (PMFA1) vs. 100:DIX20 (PYCL076W)	-1.906	-2,550 to -1,261	Yes	****	<0,0001					0:PIME4 vs. 102:PYCL076W	-0.4892	-0,6431 to -0,3353	Yes	****	<0,0001					0:DIX18 (PMFA1) vs. 100:DIX20 (PYCL076W)	-0.2061	-0,7979 to 0,3856	No	ns	>0,9999
	0:PIME4 vs. 102:PMFA1	-2.567	-3,212 to -1,923	Yes	****	<0,0001															0:DIX18 (PMFA1) vs. 100:DIX21 (PIME4)	-1.277	-1,921 to -0,6322	Yes	****	<0,0001					0:PIME4 vs. 102:PMFA1	-0.4268	-0,5807 to -0,2728	Yes	****	<0,0001					0:DIX18 (PMFA1) vs. 100:DIX21 (PIME4)	0.4721	-0,1197 to 1,064	No	ns	0.5223
	0:PIME4 vs. 102:PFIG1	-2.28	-2,924 to -1,635	Yes	****	<0,0001															0:DIX18 (PMFA1) vs. 100:DIX22 (PHPF1)	-0.5381	-1,183 to 0,1063	No	ns	0.384					0:PIME4 vs. 102:PFIG1	-0.5321	-0,6860 to -0,3782	Yes	****	<0,0001					0:DIX18 (PMFA1) vs. 100:DIX22 (PHPF1)	-0.1169	-0,7087 to 0,4749	No	ns	>0,9999
	0:PIME4 vs. 102:PAGA2	-2.626	-3,270 to -1,981	Yes	****	<0,0001															0:DIX18 (PMFA1) vs. 100:DIX23 (PCSS1)	-0.6871	-1,332 to -0,04267	Yes	*	0.0172					0:PIME4 vs. 102:PAGA2	-0.4571	-0,6110 to -0,3031	Yes	****	<0,0001					0:DIX18 (PMFA1) vs. 100:DIX23 (PCSS1)	0.654	0,06218 to 1,246	Yes	**	0.0087
	0:PIME4 vs. 102:PFUS1	-2.821	-3,466 to -2,177	Yes	****	<0,0001															0:DIX18 (PMFA1) vs. 100:DIX24 (PFUS1)	-2.144	-2,789 to -1,500	Yes	****	<0,0001					0:PIME4 vs. 102:PFUS1	-0.5421	-0,6961 to -0,3882	Yes	****	<0,0001					0:DIX18 (PMFA1) vs. 100:DIX24 (PFUS1)	-0.9729	-1,565 to -0,3811	Yes	****	<0,0001
	0:PIME4 vs. 102:PMFA2	-3.948	-4,592 to -3,303	Yes	****	<0,0001															0:DIX18 (PMFA1) vs. 100:DIX25 (PFIG1)	-2.069	-2,713 to -1,424	Yes	****	<0,0001					0:PIME4 vs. 102:PMFA2	-0.4213	-0,5752 to -0,2673	Yes	****	<0,0001					0:DIX18 (PMFA1) vs. 100:DIX25 (PFIG1)	-0.4413	-1,033 to 0,1504	No	ns	0.7194
	0:PHPF1 vs. 0:PYCL076W	-0.1796	-0,6788 to 0,3196	No	ns	>0,9999															0:DIX19 (PAGA2) vs. 0:DIX20 (PYCL076W)	-0.2535	-0,7527 to 0,2457	No	ns	0.9999					0:PHPF1 vs. 0:PYCL076W	-0.09038	-0,2096 to 0,02885	No	ns	0.6749					0:DIX19 (PAGA2) vs. 0:DIX20 (PYCL076W)	0.6561	0,1978 to 1,115	Yes	****	<0,0001
	0:PHPF1 vs. 0:PMFA1	-0.7453	-1,244 to -0,2461	Yes	****	<0,0001															0:DIX19 (PAGA2) vs. 0:DIX21 (PIME4)	0.3757	-0,1235 to 0,8749	No	ns	0.6946					0:PHPF1 vs. 0:PMFA1	-0.02796	-0,1472 to 0,09128	No	ns	>0,9999					0:DIX19 (PAGA2) vs. 0:DIX21 (PIME4)	1.334	0,8760 to 1,793	Yes	****	<0,0001
	0:PHPF1 vs. 0:PFIG1	-0.4577	-0,9569 to 0,04146	No	ns	0.1582															0:DIX19 (PAGA2) vs. 0:DIX22 (PHPF1)	1.114	0,6151 to 1,613	Yes	****	<0,0001					0:PHPF1 vs. 0:PFIG1	-0.1333	-0,2525 to -0,01404	Yes	**	0.007					0:DIX19 (PAGA2) vs. 0:DIX22 (PHPF1)	0.7454	0,2870 to 1,204	Yes	****	<0,0001
	0:PHPF1 vs. 0:PAGA2	-0.8036	-1,303 to -0,3044	Yes	****	<0,0001															0:DIX19 (PAGA2) vs. 0:DIX23 (PCSS1)	0.9653	0,4661 to 1,464	Yes	****	<0,0001					0:PHPF1 vs. 0:PAGA2	-0.05824	-0,1775 to 0,06099	No	ns	>0,9999					0:DIX19 (PAGA2) vs. 0:DIX23 (PCSS1)	1.516	1,058 to 1,975	Yes	****	<0,0001
	0:PHPF1 vs. 0:PFUS1	-0.9993	-1,499 to -0,5001	Yes	****	<0,0001															0:DIX19 (PAGA2) vs. 0:DIX24 (PFUS1)	-0.4917	-0,9909 to 0,007513	No	ns	0.0626					0:PHPF1 vs. 0:PFUS1	-0.1433	-0,2625 to -0,02407	Yes	**	0.0014					0:DIX19 (PAGA2) vs. 0:DIX24 (PFUS1)	-0.1106	-0,5690 to 0,3478	No	ns	>0,9999
	0:PHPF1 vs. 0:PMFA2	-2.126	-2,625 to -1,626	Yes	****	<0,0001															0:DIX19 (PAGA2) vs. 0:DIX25 (PFIG1)	-0.4162	-0,9154 to 0,08301	No	ns	0.3887					0:PHPF1 vs. 0:PMFA2	-0.02246	-0,1417 to 0,09678	No	ns	>0,9999					0:DIX19 (PAGA2) vs. 0:DIX25 (PFIG1)	0.4209	-0,03745 to 0,8793	No	ns	0.1555
	0:PHPF1 vs. 10-4:PCSS1	0.7635	0,09103 to 1,436	Yes	**	0.005															0:DIX19 (PAGA2) vs. 0.0001:DIX17 (PMFA2)	0.3943	-0,2781 to 1,067	No	ns	0.9942					0:PHPF1 vs. 10-4:PCSS1	-0.06539	-0,2260 to 0,09523	No	ns	>0,9999					0:DIX19 (PAGA2) vs. 0.0001:DIX17 (PMFA2)	-1.3	-1,917 to -0,6822	Yes	****	<0,0001
	0:PHPF1 vs. 10-4:PIME4	0.5492	-0,1232 to 1,222	No	ns	0.4502															0:DIX19 (PAGA2) vs. 0.0001:DIX18 (PMFA1)	0.3796	-0,2928 to 1,052	No	ns	0.9977					0:PHPF1 vs. 10-4:PIME4	-0.09782	-0,2584 to 0,06281	No	ns	0.9865					0:DIX19 (PAGA2) vs. 0.0001:DIX18 (PMFA1)	0.08613	-0,5314 to 0,7037	No	ns	>0,9999
	0:PHPF1 vs. 10-4:PHPF1	0.08242	-0,3682 to 0,5330	No	ns	>0,9999															0:DIX19 (PAGA2) vs. 0.0001:DIX19 (PAGA2)	0.08242	-0,3682 to 0,5330	No	ns	>0,9999					0:PHPF1 vs. 10-4:PHPF1	0.02435	-0,08328 to 0,1320	No	ns	>0,9999					0:DIX19 (PAGA2) vs. 0.0001:DIX19 (PAGA2)	0.05807	-0,3557 to 0,4718	No	ns	>0,9999
	0:PHPF1 vs. 10-4:PYCL076W	-0.09722	-0,7697 to 0,5753	No	ns	>0,9999															0:DIX19 (PAGA2) vs. 0.0001:DIX20 (PYCL076W)	-0.1711	-0,8436 to 0,5014	No	ns	>0,9999					0:PHPF1 vs. 10-4:PYCL076W	-0.06603	-0,2267 to 0,09459	No	ns	>0,9999					0:DIX19 (PAGA2) vs. 0.0001:DIX20 (PYCL076W)	0.7142	0,09670 to 1,332	Yes	**	0.0034
	0:PHPF1 vs. 10-4:PMFA1	-0.6629	-1,335 to 0,009617	No	ns	0.0619															0:DIX19 (PAGA2) vs. 0.0001:DIX21 (PIME4)	0.4582	-0,2143 to 1,131	No	ns	0.9032					0:PHPF1 vs. 10-4:PMFA1	-0.003605	-0,1642 to 0,1570	No	ns	>0,9999					0:DIX19 (PAGA2) vs. 0.0001:DIX21 (PIME4)	1.392	0,7749 to 2,010	Yes	****	<0,0001
	0:PHPF1 vs. 10-4:PFIG1	-0.3753	-1,048 to 0,2972	No	ns	0.9983															0:DIX19 (PAGA2) vs. 0.0001:DIX22 (PHPF1)	1.197	0,5242 to 1,869	Yes	****	<0,0001					0:PHPF1 vs. 10-4:PFIG1	-0.1089	-0,2695 to 0,05171	No	ns	0.9095					0:DIX19 (PAGA2) vs. 0.0001:DIX22 (PHPF1)	0.8035	0,1860 to 1,421	Yes	***	0.0002
	0:PHPF1 vs. 10-4:PAGA2	-0.7212	-1,394 to -0,04873	Yes	*	0.0155															0:DIX19 (PAGA2) vs. 0.0001:DIX23 (PCSS1)	1.048	0,3752 to 1,720	Yes	****	<0,0001					0:PHPF1 vs. 10-4:PAGA2	-0.03389	-0,1945 to 0,1267	No	ns	>0,9999					0:DIX19 (PAGA2) vs. 0.0001:DIX23 (PCSS1)	1.574	0,9568 to 2,192	Yes	****	<0,0001
	0:PHPF1 vs. 10-4:PFUS1	-0.9169	-1,589 to -0,2444	Yes	****	<0,0001															0:DIX19 (PAGA2) vs. 0.0001:DIX24 (PFUS1)	-0.4093	-1,082 to 0,2632	No	ns	0.9867					0:PHPF1 vs. 10-4:PFUS1	-0.119	-0,2796 to 0,04167	No	ns	0.7378					0:DIX19 (PAGA2) vs. 0.0001:DIX24 (PFUS1)	-0.05253	-0,6701 to 0,5650	No	ns	>0,9999
	0:PHPF1 vs. 10-4:PMFA2	-2.043	-2,716 to -1,371	Yes	****	<0,0001															0:DIX19 (PAGA2) vs. 0.0001:DIX25 (PFIG1)	-0.3338	-1,006 to 0,3387	No	ns	>0,9999					0:PHPF1 vs. 10-4:PMFA2	0.001893	-0,1587 to 0,1625	No	ns	>0,9999					0:DIX19 (PAGA2) vs. 0.0001:DIX25 (PFIG1)	0.479	-0,1385 to 1,097	No	ns	0.6078
	0:PHPF1 vs. 10-3:PCSS1	0.1782	-0,4942 to 0,8507	No	ns	>0,9999															0:DIX19 (PAGA2) vs. 0.001:DIX17 (PMFA2)	-0.1909	-0,8634 to 0,4816	No	ns	>0,9999					0:PHPF1 vs. 10-3:PCSS1	-0.1922	-0,3528 to -0,03159	Yes	**	0.0016					0:DIX19 (PAGA2) vs. 0.001:DIX17 (PMFA2)	-1.758	-2,376 to -1,141	Yes	****	<0,0001
	0:PHPF1 vs. 10-3:PIME4	-0.03603	-0,7085 to 0,6365	No	ns	>0,9999															0:DIX19 (PAGA2) vs. 0.001:DIX18 (PMFA1)	-0.2056	-0,8781 to 0,4669	No	ns	>0,9999					0:PHPF1 vs. 10-3:PIME4	-0.2246	-0,3853 to -0,06402	Yes	****	<0,0001					0:DIX19 (PAGA2) vs. 0.001:DIX18 (PMFA1)	-0.3723	-0,9898 to 0,2452	No	ns	0.9891
	0:PHPF1 vs. 10-3:PHPF1	-0.5029	-0,9535 to -0,05224	Yes	**	0.0072															0:DIX19 (PAGA2) vs. 0.001:DIX19 (PAGA2)	-0.5029	-0,9535 to -0,05224	Yes	**	0.0072					0:PHPF1 vs. 10-3:PHPF1	-0.1025	-0,2101 to 0,005151	No	ns	0.0998					0:DIX19 (PAGA2) vs. 0.001:DIX19 (PAGA2)	-0.4004	-0,8142 to 0,01340	No	ns	0.0805
	0:PHPF1 vs. 10-3:PYCL076W	-0.6825	-1,355 to -0,01000	Yes	*	0.0398															0:DIX19 (PAGA2) vs. 0.001:DIX20 (PYCL076W)	-0.7564	-1,429 to -0,08389	Yes	**	0.0061					0:PHPF1 vs. 10-3:PYCL076W	-0.1929	-0,3535 to -0,03224	Yes	**	0.0014					0:DIX19 (PAGA2) vs. 0.001:DIX20 (PYCL076W)	0.2558	-0,3617 to 0,8733	No	ns	>0,9999
	0:PHPF1 vs. 10-3:PMFA1	-1.248	-1,921 to -0,5757	Yes	****	<0,0001															0:DIX19 (PAGA2) vs. 0.001:DIX21 (PIME4)	-0.1271	-0,7996 to 0,5454	No	ns	>0,9999					0:PHPF1 vs. 10-3:PMFA1	-0.1304	-0,2911 to 0,03019	No	ns	0.4678					0:DIX19 (PAGA2) vs. 0.001:DIX21 (PIME4)	0.934	0,3165 to 1,552	Yes	****	<0,0001
	0:PHPF1 vs. 10-3:PFIG1	-0.9606	-1,633 to -0,2881	Yes	****	<0,0001															0:DIX19 (PAGA2) vs. 0.001:DIX22 (PHPF1)	0.6114	-0,06105 to 1,284	No	ns	0.174					0:PHPF1 vs. 10-3:PFIG1	-0.2357	-0,3964 to -0,07512	Yes	****	<0,0001					0:DIX19 (PAGA2) vs. 0.001:DIX22 (PHPF1)	0.345	-0,2725 to 0,9625	No	ns	0.9983
	0:PHPF1 vs. 10-3:PAGA2	-1.306	-1,979 to -0,6340	Yes	****	<0,0001															0:DIX19 (PAGA2) vs. 0.001:DIX23 (PCSS1)	0.4624	-0,2100 to 1,135	No	ns	0.8898					0:PHPF1 vs. 10-3:PAGA2	-0.1607	-0,3213 to -9,160e-005	Yes	*	0.0496					0:DIX19 (PAGA2) vs. 0.001:DIX23 (PCSS1)	1.116	0,4983 to 1,733	Yes	****	<0,0001
	0:PHPF1 vs. 10-3:PFUS1	-1.502	-2,175 to -0,8297	Yes	****	<0,0001															0:DIX19 (PAGA2) vs. 0.001:DIX24 (PFUS1)	-0.9945	-1,667 to -0,3220	Yes	****	<0,0001					0:PHPF1 vs. 10-3:PFUS1	-0.2458	-0,4064 to -0,08516	Yes	****	<0,0001					0:DIX19 (PAGA2) vs. 0.001:DIX24 (PFUS1)	-0.511	-1,129 to 0,1065	No	ns	0.4109
	0:PHPF1 vs. 10-3:PMFA2	-2.629	-3,301 to -1,956	Yes	****	<0,0001															0:DIX19 (PAGA2) vs. 0.001:DIX25 (PFIG1)	-0.919	-1,592 to -0,2465	Yes	****	<0,0001					0:PHPF1 vs. 10-3:PMFA2	-0.1249	-0,2856 to 0,03569	No	ns	0.5997					0:DIX19 (PAGA2) vs. 0.001:DIX25 (PFIG1)	0.02057	-0,5970 to 0,6381	No	ns	>0,9999
	0:PHPF1 vs. 10-2:PCSS1	-0.5095	-1,182 to 0,1630	No	ns	0.6764															0:DIX19 (PAGA2) vs. 0.01:DIX17 (PMFA2)	-0.8787	-1,551 to -0,2062	Yes	***	0.0002					0:PHPF1 vs. 10-2:PCSS1	-0.4993	-0,6599 to -0,3386	Yes	****	<0,0001					0:DIX19 (PAGA2) vs. 0.01:DIX17 (PMFA2)	-2.139	-2,756 to -1,521	Yes	****	<0,0001
	0:PHPF1 vs. 10-2:PIME4	-0.7238	-1,396 to -0,05128	Yes	*	0.0145															0:DIX19 (PAGA2) vs. 0.01:DIX18 (PMFA1)	-0.8934	-1,566 to -0,2209	Yes	****	<0,0001					0:PHPF1 vs. 10-2:PIME4	-0.5317	-0,6923 to -0,3711	Yes	****	<0,0001					0:DIX19 (PAGA2) vs. 0.01:DIX18 (PMFA1)	-0.753	-1,371 to -0,1355	Yes	***	0.001
	0:PHPF1 vs. 10-2:PHPF1	-1.191	-1,641 to -0,7400	Yes	****	<0,0001															0:DIX19 (PAGA2) vs. 0.01:DIX19 (PAGA2)	-1.191	-1,641 to -0,7400	Yes	****	<0,0001					0:PHPF1 vs. 10-2:PHPF1	-0.4095	-0,5171 to -0,3019	Yes	****	<0,0001					0:DIX19 (PAGA2) vs. 0.01:DIX19 (PAGA2)	-0.7811	-1,195 to -0,3673	Yes	****	<0,0001
	0:PHPF1 vs. 10-2:PYCL076W	-1.37	-2,043 to -0,6977	Yes	****	<0,0001															0:DIX19 (PAGA2) vs. 0.01:DIX20 (PYCL076W)	-1.444	-2,117 to -0,7716	Yes	****	<0,0001					0:PHPF1 vs. 10-2:PYCL076W	-0.4999	-0,6605 to -0,3393	Yes	****	<0,0001					0:DIX19 (PAGA2) vs. 0.01:DIX20 (PYCL076W)	-0.1249	-0,7425 to 0,4926	No	ns	>0,9999
	0:PHPF1 vs. 10-2:PMFA1	-1.936	-2,608 to -1,263	Yes	****	<0,0001															0:DIX19 (PAGA2) vs. 0.01:DIX21 (PIME4)	-0.8148	-1,487 to -0,1424	Yes	**	0.0012					0:PHPF1 vs. 10-2:PMFA1	-0.4375	-0,5981 to -0,2768	Yes	****	<0,0001					0:DIX19 (PAGA2) vs. 0.01:DIX21 (PIME4)	0.5533	-0,06420 to 1,171	No	ns	0.2036
	0:PHPF1 vs. 10-2:PFIG1	-1.648	-2,321 to -0,9758	Yes	****	<0,0001															0:DIX19 (PAGA2) vs. 0.01:DIX22 (PHPF1)	-0.0763	-0,7488 to 0,5962	No	ns	>0,9999					0:PHPF1 vs. 10-2:PFIG1	-0.5428	-0,7034 to -0,3822	Yes	****	<0,0001					0:DIX19 (PAGA2) vs. 0.01:DIX22 (PHPF1)	-0.03568	-0,6532 to 0,5818	No	ns	>0,9999
	0:PHPF1 vs. 10-2:PAGA2	-1.994	-2,667 to -1,322	Yes	****	<0,0001															0:DIX19 (PAGA2) vs. 0.01:DIX23 (PCSS1)	-0.2253	-0,8978 to 0,4472	No	ns	>0,9999					0:PHPF1 vs. 10-2:PAGA2	-0.4677	-0,6284 to -0,3071	Yes	****	<0,0001					0:DIX19 (PAGA2) vs. 0.01:DIX23 (PCSS1)	0.7352	0,1176 to 1,353	Yes	**	0.0018
	0:PHPF1 vs. 10-2:PFUS1	-2.19	-2,862 to -1,517	Yes	****	<0,0001															0:DIX19 (PAGA2) vs. 0.01:DIX24 (PFUS1)	-1.682	-2,355 to -1,010	Yes	****	<0,0001					0:PHPF1 vs. 10-2:PFUS1	-0.5528	-0,7134 to -0,3922	Yes	****	<0,0001					0:DIX19 (PAGA2) vs. 0.01:DIX24 (PFUS1)	-0.8917	-1,509 to -0,2742	Yes	****	<0,0001
	0:PHPF1 vs. 10-2:PMFA2	-3.316	-3,989 to -2,644	Yes	****	<0,0001															0:DIX19 (PAGA2) vs. 0.01:DIX25 (PFIG1)	-1.607	-2,279 to -0,9343	Yes	****	<0,0001					0:PHPF1 vs. 10-2:PMFA2	-0.432	-0,5926 to -0,2713	Yes	****	<0,0001					0:DIX19 (PAGA2) vs. 0.01:DIX25 (PFIG1)	-0.3601	-0,9777 to 0,2574	No	ns	0.9949
	0:PHPF1 vs. 10-1:Neg.Con.	-0.05316	-0,8569 to 0,7506	No	ns	>0,9999															0:DIX19 (PAGA2) vs. 0.1:DIX14 (Neg.Con.)	-0.3872	-1,191 to 0,4166	No	ns	>0,9999					0:PHPF1 vs. 10-1:Neg.Con.	-0.5395	-0,7315 to -0,3475	Yes	****	<0,0001					0:DIX19 (PAGA2) vs. 0.1:DIX14 (Neg.Con.)	1.232	0,4937 to 1,970	Yes	****	<0,0001
	0:PHPF1 vs. 10-1:PPGK1	-2.38	-3,184 to -1,577	Yes	****	<0,0001															0:DIX19 (PAGA2) vs. 0.1:DIX27 (PPGK1)	-0.3803	-1,184 to 0,4235	No	ns	>0,9999					0:PHPF1 vs. 10-1:PPGK1	-0.5106	-0,7026 to -0,3186	Yes	****	<0,0001					0:DIX19 (PAGA2) vs. 0.1:DIX27 (PPGK1)	-1.124	-1,863 to -0,3864	Yes	****	<0,0001
	0:PHPF1 vs. 10-1:PTDH3	-3.325	-4,129 to -2,521	Yes	****	<0,0001															0:DIX19 (PAGA2) vs. 0.1:DIX28 (PTDH3)	-0.4051	-1,209 to 0,3987	No	ns	>0,9999					0:PHPF1 vs. 10-1:PTDH3	-0.5395	-0,7315 to -0,3475	Yes	****	<0,0001					0:DIX19 (PAGA2) vs. 0.1:DIX28 (PTDH3)	-2.04	-2,778 to -1,302	Yes	****	<0,0001
	0:PHPF1 vs. 10-1:PCSS1	-0.6362	-1,281 to 0,008262	No	ns	0.0606															0:DIX19 (PAGA2) vs. 0.1:DIX17 (PMFA2)	-1.005	-1,650 to -0,3609	Yes	****	<0,0001					0:PHPF1 vs. 10-1:PCSS1	-0.6238	-0,7777 to -0,4699	Yes	****	<0,0001					0:DIX19 (PAGA2) vs. 0.1:DIX17 (PMFA2)	-2.141	-2,733 to -1,549	Yes	****	<0,0001
	0:PHPF1 vs. 10-1:PIME4	-0.8505	-1,495 to -0,2060	Yes	***	0.0001															0:DIX19 (PAGA2) vs. 0.1:DIX18 (PMFA1)	-1.02	-1,665 to -0,3756	Yes	****	<0,0001					0:PHPF1 vs. 10-1:PIME4	-0.6562	-0,8102 to -0,5023	Yes	****	<0,0001					0:DIX19 (PAGA2) vs. 0.1:DIX18 (PMFA1)	-0.7552	-1,347 to -0,1634	Yes	***	0.0003
	0:PHPF1 vs. 10-1:PHPF1	-1.317	-1,725 to -0,9097	Yes	****	<0,0001															0:DIX19 (PAGA2) vs. 0.1:DIX19 (PAGA2)	-1.317	-1,725 to -0,9097	Yes	****	<0,0001					0:PHPF1 vs. 10-1:PHPF1	-0.5341	-0,6314 to -0,4367	Yes	****	<0,0001					0:DIX19 (PAGA2) vs. 0.1:DIX19 (PAGA2)	-0.7832	-1,158 to -0,4090	Yes	****	<0,0001
	0:PHPF1 vs. 10-1:PYCL076W	-1.497	-2,141 to -0,8525	Yes	****	<0,0001															0:DIX19 (PAGA2) vs. 0.1:DIX20 (PYCL076W)	-1.571	-2,215 to -0,9264	Yes	****	<0,0001					0:PHPF1 vs. 10-1:PYCL076W	-0.6244	-0,7784 to -0,4705	Yes	****	<0,0001					0:DIX19 (PAGA2) vs. 0.1:DIX20 (PYCL076W)	-0.1271	-0,7189 to 0,4647	No	ns	>0,9999
	0:PHPF1 vs. 10-1:PMFA1	-2.063	-2,707 to -1,418	Yes	****	<0,0001															0:DIX19 (PAGA2) vs. 0.1:DIX21 (PIME4)	-0.9415	-1,586 to -0,2971	Yes	****	<0,0001					0:PHPF1 vs. 10-1:PMFA1	-0.562	-0,7159 to -0,4081	Yes	****	<0,0001					0:DIX19 (PAGA2) vs. 0.1:DIX21 (PIME4)	0.5512	-0,04062 to 1,143	No	ns	0.1317
	0:PHPF1 vs. 10-1:PFIG1	-1.775	-2,419 to -1,131	Yes	****	<0,0001															0:DIX19 (PAGA2) vs. 0.1:DIX22 (PHPF1)	-0.203	-0,8475 to 0,4415	No	ns	>0,9999					0:PHPF1 vs. 10-1:PFIG1	-0.6673	-0,8213 to -0,5134	Yes	****	<0,0001					0:DIX19 (PAGA2) vs. 0.1:DIX22 (PHPF1)	-0.03784	-0,6296 to 0,5539	No	ns	>0,9999
	0:PHPF1 vs. 10-1:PAGA2	-2.121	-2,765 to -1,476	Yes	****	<0,0001															0:DIX19 (PAGA2) vs. 0.1:DIX23 (PCSS1)	-0.352	-0,9964 to 0,2925	No	ns	0.9991					0:PHPF1 vs. 10-1:PAGA2	-0.5923	-0,7462 to -0,4384	Yes	****	<0,0001					0:DIX19 (PAGA2) vs. 0.1:DIX23 (PCSS1)	0.733	0,1412 to 1,325	Yes	***	0.0007
	0:PHPF1 vs. 10-1:PFUS1	-2.317	-2,961 to -1,672	Yes	****	<0,0001															0:DIX19 (PAGA2) vs. 0.1:DIX24 (PFUS1)	-1.809	-2,453 to -1,165	Yes	****	<0,0001					0:PHPF1 vs. 10-1:PFUS1	-0.6774	-0,8313 to -0,5234	Yes	****	<0,0001					0:DIX19 (PAGA2) vs. 0.1:DIX24 (PFUS1)	-0.8938	-1,486 to -0,3021	Yes	****	<0,0001
	0:PHPF1 vs. 10-1:PMFA2	-3.443	-4,087 to -2,799	Yes	****	<0,0001															0:DIX19 (PAGA2) vs. 0.1:DIX25 (PFIG1)	-1.733	-2,378 to -1,089	Yes	****	<0,0001					0:PHPF1 vs. 10-1:PMFA2	-0.5565	-0,7104 to -0,4026	Yes	****	<0,0001					0:DIX19 (PAGA2) vs. 0.1:DIX25 (PFIG1)	-0.3623	-0,9541 to 0,2295	No	ns	0.9849
	0:PHPF1 vs. 100:PCSS1	-0.7992	-1,472 to -0,1267	Yes	**	0.0018															0:DIX19 (PAGA2) vs. 1:DIX17 (PMFA2)	-1.168	-1,841 to -0,4959	Yes	****	<0,0001					0:PHPF1 vs. 100:PCSS1	-0.6667	-0,8273 to -0,5060	Yes	****	<0,0001					0:DIX19 (PAGA2) vs. 1:DIX17 (PMFA2)	-2.261	-2,879 to -1,644	Yes	****	<0,0001
	0:PHPF1 vs. 100:PIME4	-1.013	-1,686 to -0,3410	Yes	****	<0,0001															0:DIX19 (PAGA2) vs. 1:DIX18 (PMFA1)	-1.183	-1,856 to -0,5106	Yes	****	<0,0001					0:PHPF1 vs. 100:PIME4	-0.6991	-0,8597 to -0,5385	Yes	****	<0,0001					0:DIX19 (PAGA2) vs. 1:DIX18 (PMFA1)	-0.8753	-1,493 to -0,2578	Yes	****	<0,0001
	0:PHPF1 vs. 100:PHPF1	-1.48	-1,931 to -1,030	Yes	****	<0,0001															0:DIX19 (PAGA2) vs. 1:DIX19 (PAGA2)	-1.48	-1,931 to -1,030	Yes	****	<0,0001					0:PHPF1 vs. 100:PHPF1	-0.5769	-0,6845 to -0,4693	Yes	****	<0,0001					0:DIX19 (PAGA2) vs. 1:DIX19 (PAGA2)	-0.9034	-1,317 to -0,4896	Yes	****	<0,0001
	0:PHPF1 vs. 100:PYCL076W	-1.66	-2,332 to -0,9874	Yes	****	<0,0001															0:DIX19 (PAGA2) vs. 1:DIX20 (PYCL076W)	-1.734	-2,406 to -1,061	Yes	****	<0,0001					0:PHPF1 vs. 100:PYCL076W	-0.6673	-0,8279 to -0,5067	Yes	****	<0,0001					0:DIX19 (PAGA2) vs. 1:DIX20 (PYCL076W)	-0.2472	-0,8647 to 0,3703	No	ns	>0,9999
	0:PHPF1 vs. 100:PMFA1	-2.226	-2,898 to -1,553	Yes	****	<0,0001															0:DIX19 (PAGA2) vs. 1:DIX21 (PIME4)	-1.105	-1,777 to -0,4320	Yes	****	<0,0001					0:PHPF1 vs. 100:PMFA1	-0.6049	-0,7655 to -0,4442	Yes	****	<0,0001					0:DIX19 (PAGA2) vs. 1:DIX21 (PIME4)	0.431	-0,1865 to 1,049	No	ns	0.8656
	0:PHPF1 vs. 100:PFIG1	-1.938	-2,610 to -1,266	Yes	****	<0,0001															0:DIX19 (PAGA2) vs. 1:DIX22 (PHPF1)	-0.366	-1,038 to 0,3065	No	ns	0.9992					0:PHPF1 vs. 100:PFIG1	-0.7102	-0,8708 to -0,5496	Yes	****	<0,0001					0:DIX19 (PAGA2) vs. 1:DIX22 (PHPF1)	-0.158	-0,7755 to 0,4596	No	ns	>0,9999
	0:PHPF1 vs. 100:PAGA2	-2.284	-2,956 to -1,611	Yes	****	<0,0001															0:DIX19 (PAGA2) vs. 1:DIX23 (PCSS1)	-0.515	-1,187 to 0,1575	No	ns	0.6458					0:PHPF1 vs. 100:PAGA2	-0.6351	-0,7958 to -0,4745	Yes	****	<0,0001					0:DIX19 (PAGA2) vs. 1:DIX23 (PCSS1)	0.6129	-0,004638 to 1,230	No	ns	0.056
	0:PHPF1 vs. 100:PFUS1	-2.48	-3,152 to -1,807	Yes	****	<0,0001															0:DIX19 (PAGA2) vs. 1:DIX24 (PFUS1)	-1.972	-2,644 to -1,299	Yes	****	<0,0001					0:PHPF1 vs. 100:PFUS1	-0.7202	-0,8808 to -0,5596	Yes	****	<0,0001					0:DIX19 (PAGA2) vs. 1:DIX24 (PFUS1)	-1.014	-1,631 to -0,3964	Yes	****	<0,0001
	0:PHPF1 vs. 100:PMFA2	-3.606	-4,278 to -2,933	Yes	****	<0,0001															0:DIX19 (PAGA2) vs. 1:DIX25 (PFIG1)	-1.896	-2,569 to -1,224	Yes	****	<0,0001					0:PHPF1 vs. 100:PMFA2	-0.5994	-0,7600 to -0,4387	Yes	****	<0,0001					0:DIX19 (PAGA2) vs. 1:DIX25 (PFIG1)	-0.4824	-1,100 to 0,1351	No	ns	0.5865
	0:PHPF1 vs. 101:PCSS1	-0.7387	-1,411 to -0,06618	Yes	**	0.0098															0:DIX19 (PAGA2) vs. 10:DIX17 (PMFA2)	-1.108	-1,780 to -0,4354	Yes	****	<0,0001					0:PHPF1 vs. 101:PCSS1	-0.5924	-0,7530 to -0,4318	Yes	****	<0,0001					0:DIX19 (PAGA2) vs. 10:DIX17 (PMFA2)	-2.275	-2,892 to -1,657	Yes	****	<0,0001
	0:PHPF1 vs. 101:PIME4	-0.9529	-1,625 to -0,2805	Yes	****	<0,0001															0:DIX19 (PAGA2) vs. 10:DIX18 (PMFA1)	-1.123	-1,795 to -0,4501	Yes	****	<0,0001					0:PHPF1 vs. 101:PIME4	-0.6248	-0,7854 to -0,4642	Yes	****	<0,0001					0:DIX19 (PAGA2) vs. 10:DIX18 (PMFA1)	-0.8891	-1,507 to -0,2715	Yes	****	<0,0001
	0:PHPF1 vs. 101:PHPF1	-1.42	-1,870 to -0,9692	Yes	****	<0,0001															0:DIX19 (PAGA2) vs. 10:DIX19 (PAGA2)	-1.42	-1,870 to -0,9692	Yes	****	<0,0001					0:PHPF1 vs. 101:PHPF1	-0.5027	-0,6103 to -0,3950	Yes	****	<0,0001					0:DIX19 (PAGA2) vs. 10:DIX19 (PAGA2)	-0.9171	-1,331 to -0,5033	Yes	****	<0,0001
	0:PHPF1 vs. 101:PYCL076W	-1.599	-2,272 to -0,9269	Yes	****	<0,0001															0:DIX19 (PAGA2) vs. 10:DIX20 (PYCL076W)	-1.673	-2,346 to -1,001	Yes	****	<0,0001					0:PHPF1 vs. 101:PYCL076W	-0.593	-0,7537 to -0,4324	Yes	****	<0,0001					0:DIX19 (PAGA2) vs. 10:DIX20 (PYCL076W)	-0.261	-0,8785 to 0,3565	No	ns	>0,9999
	0:PHPF1 vs. 101:PMFA1	-2.165	-2,838 to -1,493	Yes	****	<0,0001															0:DIX19 (PAGA2) vs. 10:DIX21 (PIME4)	-1.044	-1,717 to -0,3715	Yes	****	<0,0001					0:PHPF1 vs. 101:PMFA1	-0.5306	-0,6912 to -0,3700	Yes	****	<0,0001					0:DIX19 (PAGA2) vs. 10:DIX21 (PIME4)	0.4173	-0,2002 to 1,035	No	ns	0.914
	0:PHPF1 vs. 101:PFIG1	-1.877	-2,550 to -1,205	Yes	****	<0,0001															0:DIX19 (PAGA2) vs. 10:DIX22 (PHPF1)	-0.3055	-0,9780 to 0,3670	No	ns	>0,9999					0:PHPF1 vs. 101:PFIG1	-0.6359	-0,7965 to -0,4753	Yes	****	<0,0001					0:DIX19 (PAGA2) vs. 10:DIX22 (PHPF1)	-0.1717	-0,7892 to 0,4458	No	ns	>0,9999
	0:PHPF1 vs. 101:PAGA2	-2.223	-2,896 to -1,551	Yes	****	<0,0001															0:DIX19 (PAGA2) vs. 10:DIX23 (PCSS1)	-0.4545	-1,127 to 0,2180	No	ns	0.9139					0:PHPF1 vs. 101:PAGA2	-0.5609	-0,7215 to -0,4003	Yes	****	<0,0001					0:DIX19 (PAGA2) vs. 10:DIX23 (PCSS1)	0.5991	-0,01840 to 1,217	No	ns	0.0776
	0:PHPF1 vs. 101:PFUS1	-2.419	-3,092 to -1,747	Yes	****	<0,0001															0:DIX19 (PAGA2) vs. 10:DIX24 (PFUS1)	-1.911	-2,584 to -1,239	Yes	****	<0,0001					0:PHPF1 vs. 101:PFUS1	-0.646	-0,8066 to -0,4853	Yes	****	<0,0001					0:DIX19 (PAGA2) vs. 10:DIX24 (PFUS1)	-1.028	-1,645 to -0,4102	Yes	****	<0,0001
	0:PHPF1 vs. 101:PMFA2	-3.545	-4,218 to -2,873	Yes	****	<0,0001															0:DIX19 (PAGA2) vs. 10:DIX25 (PFIG1)	-1.836	-2,508 to -1,163	Yes	****	<0,0001					0:PHPF1 vs. 101:PMFA2	-0.5251	-0,6857 to -0,3645	Yes	****	<0,0001					0:DIX19 (PAGA2) vs. 10:DIX25 (PFIG1)	-0.4962	-1,114 to 0,1213	No	ns	0.5003
	0:PHPF1 vs. 102:Neg.Con.	-0.09108	-0,8949 to 0,7127	No	ns	>0,9999															0:DIX19 (PAGA2) vs. 100:DIX14 (Neg.Con.)	-0.4251	-1,229 to 0,3787	No	ns	0.9996					0:PHPF1 vs. 102:Neg.Con.	-0.5264	-0,7184 to -0,3345	Yes	****	<0,0001					0:DIX19 (PAGA2) vs. 100:DIX14 (Neg.Con.)	1.181	0,4427 to 1,919	Yes	****	<0,0001
	0:PHPF1 vs. 102:PPGK1	-2.418	-3,222 to -1,615	Yes	****	<0,0001															0:DIX19 (PAGA2) vs. 100:DIX27 (PPGK1)	-0.4182	-1,222 to 0,3856	No	ns	0.9998					0:PHPF1 vs. 102:PPGK1	-0.4975	-0,6895 to -0,3055	Yes	****	<0,0001					0:DIX19 (PAGA2) vs. 100:DIX27 (PPGK1)	-1.175	-1,914 to -0,4374	Yes	****	<0,0001
	0:PHPF1 vs. 102:PTDH3	-3.363	-4,166 to -2,559	Yes	****	<0,0001															0:DIX19 (PAGA2) vs. 100:DIX28 (PTDH3)	-0.443	-1,247 to 0,3608	No	ns	0.9988					0:PHPF1 vs. 102:PTDH3	-0.5264	-0,7184 to -0,3344	Yes	****	<0,0001					0:DIX19 (PAGA2) vs. 100:DIX28 (PTDH3)	-2.091	-2,829 to -1,353	Yes	****	<0,0001
	0:PHPF1 vs. 102:PCSS1	-0.6741	-1,319 to -0,02966	Yes	*	0.0241															0:DIX19 (PAGA2) vs. 100:DIX17 (PMFA2)	-1.043	-1,688 to -0,3988	Yes	****	<0,0001					0:PHPF1 vs. 102:PCSS1	-0.6107	-0,7647 to -0,4568	Yes	****	<0,0001					0:DIX19 (PAGA2) vs. 100:DIX17 (PMFA2)	-2.192	-2,784 to -1,600	Yes	****	<0,0001
	0:PHPF1 vs. 102:PIME4	-0.8884	-1,533 to -0,2439	Yes	****	<0,0001															0:DIX19 (PAGA2) vs. 100:DIX18 (PMFA1)	-1.058	-1,702 to -0,4135	Yes	****	<0,0001					0:PHPF1 vs. 102:PIME4	-0.6432	-0,7971 to -0,4892	Yes	****	<0,0001					0:DIX19 (PAGA2) vs. 100:DIX18 (PMFA1)	-0.8062	-1,398 to -0,2144	Yes	****	<0,0001
	0:PHPF1 vs. 102:PHPF1	-1.355	-1,763 to -0,9476	Yes	****	<0,0001															0:DIX19 (PAGA2) vs. 100:DIX19 (PAGA2)	-1.355	-1,763 to -0,9476	Yes	****	<0,0001					0:PHPF1 vs. 102:PHPF1	-0.521	-0,6183 to -0,4236	Yes	****	<0,0001					0:DIX19 (PAGA2) vs. 100:DIX19 (PAGA2)	-0.8342	-1,208 to -0,4600	Yes	****	<0,0001
	0:PHPF1 vs. 102:PYCL076W	-1.535	-2,179 to -0,8904	Yes	****	<0,0001															0:DIX19 (PAGA2) vs. 100:DIX20 (PYCL076W)	-1.609	-2,253 to -0,9643	Yes	****	<0,0001					0:PHPF1 vs. 102:PYCL076W	-0.6114	-0,7653 to -0,4574	Yes	****	<0,0001					0:DIX19 (PAGA2) vs. 100:DIX20 (PYCL076W)	-0.1781	-0,7699 to 0,4137	No	ns	>0,9999
	0:PHPF1 vs. 102:PMFA1	-2.101	-2,745 to -1,456	Yes	****	<0,0001															0:DIX19 (PAGA2) vs. 100:DIX21 (PIME4)	-0.9795	-1,624 to -0,3350	Yes	****	<0,0001					0:PHPF1 vs. 102:PMFA1	-0.5489	-0,7029 to -0,3950	Yes	****	<0,0001					0:DIX19 (PAGA2) vs. 100:DIX21 (PIME4)	0.5002	-0,09161 to 1,092	No	ns	0.3493
	0:PHPF1 vs. 102:PFIG1	-1.813	-2,457 to -1,168	Yes	****	<0,0001															0:DIX19 (PAGA2) vs. 100:DIX22 (PHPF1)	-0.2409	-0,8854 to 0,4035	No	ns	>0,9999					0:PHPF1 vs. 102:PFIG1	-0.6543	-0,8082 to -0,5003	Yes	****	<0,0001					0:DIX19 (PAGA2) vs. 100:DIX22 (PHPF1)	-0.08882	-0,6806 to 0,5030	No	ns	>0,9999
	0:PHPF1 vs. 102:PAGA2	-2.159	-2,803 to -1,514	Yes	****	<0,0001															0:DIX19 (PAGA2) vs. 100:DIX23 (PCSS1)	-0.3899	-1,034 to 0,2545	No	ns	0.9882					0:PHPF1 vs. 102:PAGA2	-0.5792	-0,7332 to -0,4253	Yes	****	<0,0001					0:DIX19 (PAGA2) vs. 100:DIX23 (PCSS1)	0.682	0,09024 to 1,274	Yes	**	0.0037
	0:PHPF1 vs. 102:PFUS1	-2.355	-2,999 to -1,710	Yes	****	<0,0001															0:DIX19 (PAGA2) vs. 100:DIX24 (PFUS1)	-1.847	-2,491 to -1,202	Yes	****	<0,0001					0:PHPF1 vs. 102:PFUS1	-0.6643	-0,8182 to -0,5104	Yes	****	<0,0001					0:DIX19 (PAGA2) vs. 100:DIX24 (PFUS1)	-0.9448	-1,537 to -0,3531	Yes	****	<0,0001
	0:PHPF1 vs. 102:PMFA2	-3.481	-4,125 to -2,836	Yes	****	<0,0001															0:DIX19 (PAGA2) vs. 100:DIX25 (PFIG1)	-1.771	-2,416 to -1,127	Yes	****	<0,0001					0:PHPF1 vs. 102:PMFA2	-0.5434	-0,6974 to -0,3895	Yes	****	<0,0001					0:DIX19 (PAGA2) vs. 100:DIX25 (PFIG1)	-0.4133	-1,005 to 0,1785	No	ns	0.8647
	0:PYCL076W vs. 0:PMFA1	-0.5657	-1,065 to -0,06646	Yes	**	0.0052															0:DIX20 (PYCL076W) vs. 0:DIX21 (PIME4)	0.6293	0,1301 to 1,128	Yes	***	0.0004					0:PYCL076W vs. 0:PMFA1	0.06243	-0,05680 to 0,1817	No	ns	0.9997					0:DIX20 (PYCL076W) vs. 0:DIX21 (PIME4)	0.6783	0,2199 to 1,137	Yes	****	<0,0001
	0:PYCL076W vs. 0:PFIG1	-0.2781	-0,7773 to 0,2211	No	ns	0.9984															0:DIX20 (PYCL076W) vs. 0:DIX22 (PHPF1)	1.368	0,8686 to 1,867	Yes	****	<0,0001					0:PYCL076W vs. 0:PFIG1	-0.04288	-0,1621 to 0,07635	No	ns	>0,9999					0:DIX20 (PYCL076W) vs. 0:DIX22 (PHPF1)	0.08926	-0,3691 to 0,5476	No	ns	>0,9999
	0:PYCL076W vs. 0:PAGA2	-0.624	-1,123 to -0,1248	Yes	***	0.0005															0:DIX20 (PYCL076W) vs. 0:DIX23 (PCSS1)	1.219	0,7196 to 1,718	Yes	****	<0,0001					0:PYCL076W vs. 0:PAGA2	0.03214	-0,08709 to 0,1514	No	ns	>0,9999					0:DIX20 (PYCL076W) vs. 0:DIX23 (PCSS1)	0.8601	0,4017 to 1,318	Yes	****	<0,0001
	0:PYCL076W vs. 0:PFUS1	-0.8197	-1,319 to -0,3205	Yes	****	<0,0001															0:DIX20 (PYCL076W) vs. 0:DIX24 (PFUS1)	-0.2382	-0,7374 to 0,2610	No	ns	>0,9999					0:PYCL076W vs. 0:PFUS1	-0.05292	-0,1722 to 0,06631	No	ns	>0,9999					0:DIX20 (PYCL076W) vs. 0:DIX24 (PFUS1)	-0.7668	-1,225 to -0,3084	Yes	****	<0,0001
	0:PYCL076W vs. 0:PMFA2	-1.946	-2,445 to -1,447	Yes	****	<0,0001															0:DIX20 (PYCL076W) vs. 0:DIX25 (PFIG1)	-0.1627	-0,6619 to 0,3365	No	ns	>0,9999					0:PYCL076W vs. 0:PMFA2	0.06793	-0,05131 to 0,1872	No	ns	0.9971					0:DIX20 (PYCL076W) vs. 0:DIX25 (PFIG1)	-0.2352	-0,6936 to 0,2232	No	ns	0.9999
	0:PYCL076W vs. 10-4:PCSS1	0.9432	0,2707 to 1,616	Yes	****	<0,0001															0:DIX20 (PYCL076W) vs. 0.0001:DIX17 (PMFA2)	0.6479	-0,02462 to 1,320	No	ns	0.0854					0:PYCL076W vs. 10-4:PCSS1	0.02499	-0,1356 to 0,1856	No	ns	>0,9999					0:DIX20 (PYCL076W) vs. 0.0001:DIX17 (PMFA2)	-1.956	-2,573 to -1,338	Yes	****	<0,0001
	0:PYCL076W vs. 10-4:PIME4	0.7289	0,05640 to 1,401	Yes	*	0.0127															0:DIX20 (PYCL076W) vs. 0.0001:DIX18 (PMFA1)	0.6332	-0,03932 to 1,306	No	ns	0.1152					0:PYCL076W vs. 10-4:PIME4	-0.007435	-0,1681 to 0,1532	No	ns	>0,9999					0:DIX20 (PYCL076W) vs. 0.0001:DIX18 (PMFA1)	-0.57	-1,188 to 0,04751	No	ns	0.1465
	0:PYCL076W vs. 10-4:PHPF1	0.2621	-0,4104 to 0,9346	No	ns	>0,9999															0:DIX20 (PYCL076W) vs. 0.0001:DIX19 (PAGA2)	0.3359	-0,3365 to 1,008	No	ns	>0,9999					0:PYCL076W vs. 10-4:PHPF1	0.1147	-0,04589 to 0,2754	No	ns	0.8218					0:DIX20 (PYCL076W) vs. 0.0001:DIX19 (PAGA2)	-0.5981	-1,216 to 0,01944	No	ns	0.0795
	0:PYCL076W vs. 10-4:PYCL076W	0.08242	-0,3682 to 0,5330	No	ns	>0,9999															0:DIX20 (PYCL076W) vs. 0.0001:DIX20 (PYCL076W)	0.08242	-0,3682 to 0,5330	No	ns	>0,9999					0:PYCL076W vs. 10-4:PYCL076W	0.02435	-0,08328 to 0,1320	No	ns	>0,9999					0:DIX20 (PYCL076W) vs. 0.0001:DIX20 (PYCL076W)	0.05807	-0,3557 to 0,4718	No	ns	>0,9999
	0:PYCL076W vs. 10-4:PMFA1	-0.4832	-1,156 to 0,1893	No	ns	0.8092															0:DIX20 (PYCL076W) vs. 0.0001:DIX21 (PIME4)	0.7117	0,03920 to 1,384	Yes	*	0.0197					0:PYCL076W vs. 10-4:PMFA1	0.08678	-0,07385 to 0,2474	No	ns	0.9993					0:DIX20 (PYCL076W) vs. 0.0001:DIX21 (PIME4)	0.7363	0,1188 to 1,354	Yes	**	0.0017
	0:PYCL076W vs. 10-4:PFIG1	-0.1957	-0,8682 to 0,4768	No	ns	>0,9999															0:DIX20 (PYCL076W) vs. 0.0001:DIX22 (PHPF1)	1.45	0,7777 to 2,123	Yes	****	<0,0001					0:PYCL076W vs. 10-4:PFIG1	-0.01853	-0,1792 to 0,1421	No	ns	>0,9999					0:DIX20 (PYCL076W) vs. 0.0001:DIX22 (PHPF1)	0.1473	-0,4702 to 0,7648	No	ns	>0,9999
	0:PYCL076W vs. 10-4:PAGA2	-0.5416	-1,214 to 0,1309	No	ns	0.4933															0:DIX20 (PYCL076W) vs. 0.0001:DIX23 (PCSS1)	1.301	0,6288 to 1,974	Yes	****	<0,0001					0:PYCL076W vs. 10-4:PAGA2	0.0565	-0,1041 to 0,2171	No	ns	>0,9999					0:DIX20 (PYCL076W) vs. 0.0001:DIX23 (PCSS1)	0.9182	0,3006 to 1,536	Yes	****	<0,0001
	0:PYCL076W vs. 10-4:PFUS1	-0.7372	-1,410 to -0,06476	Yes	*	0.0102															0:DIX20 (PYCL076W) vs. 0.0001:DIX24 (PFUS1)	-0.1557	-0,8282 to 0,5168	No	ns	>0,9999					0:PYCL076W vs. 10-4:PFUS1	-0.02857	-0,1892 to 0,1321	No	ns	>0,9999					0:DIX20 (PYCL076W) vs. 0.0001:DIX24 (PFUS1)	-0.7087	-1,326 to -0,09116	Yes	**	0.004
	0:PYCL076W vs. 10-4:PMFA2	-1.864	-2,536 to -1,191	Yes	****	<0,0001															0:DIX20 (PYCL076W) vs. 0.0001:DIX25 (PFIG1)	-0.08024	-0,7527 to 0,5923	No	ns	>0,9999					0:PYCL076W vs. 10-4:PMFA2	0.09228	-0,06835 to 0,2529	No	ns	0.9964					0:DIX20 (PYCL076W) vs. 0.0001:DIX25 (PFIG1)	-0.1771	-0,7947 to 0,4404	No	ns	>0,9999
	0:PYCL076W vs. 10-3:PCSS1	0.3579	-0,3146 to 1,030	No	ns	0.9996															0:DIX20 (PYCL076W) vs. 0.001:DIX17 (PMFA2)	0.0626	-0,6099 to 0,7351	No	ns	>0,9999					0:PYCL076W vs. 10-3:PCSS1	-0.1018	-0,2625 to 0,05879	No	ns	0.9701					0:DIX20 (PYCL076W) vs. 0.001:DIX17 (PMFA2)	-2.414	-3,032 to -1,797	Yes	****	<0,0001
	0:PYCL076W vs. 10-3:PIME4	0.1436	-0,5289 to 0,8161	No	ns	>0,9999															0:DIX20 (PYCL076W) vs. 0.001:DIX18 (PMFA1)	0.04789	-0,6246 to 0,7204	No	ns	>0,9999					0:PYCL076W vs. 10-3:PIME4	-0.1343	-0,2949 to 0,02636	No	ns	0.3811					0:DIX20 (PYCL076W) vs. 0.001:DIX18 (PMFA1)	-1.028	-1,646 to -0,4109	Yes	****	<0,0001
	0:PYCL076W vs. 10-3:PHPF1	-0.3232	-0,9957 to 0,3493	No	ns	>0,9999															0:DIX20 (PYCL076W) vs. 0.001:DIX19 (PAGA2)	-0.2493	-0,9218 to 0,4232	No	ns	>0,9999					0:PYCL076W vs. 10-3:PHPF1	-0.01209	-0,1727 to 0,1485	No	ns	>0,9999					0:DIX20 (PYCL076W) vs. 0.001:DIX19 (PAGA2)	-1.057	-1,674 to -0,4390	Yes	****	<0,0001
	0:PYCL076W vs. 10-3:PYCL076W	-0.5029	-0,9535 to -0,05224	Yes	**	0.0072															0:DIX20 (PYCL076W) vs. 0.001:DIX20 (PYCL076W)	-0.5029	-0,9535 to -0,05224	Yes	**	0.0072					0:PYCL076W vs. 10-3:PYCL076W	-0.1025	-0,2101 to 0,005151	No	ns	0.0998					0:DIX20 (PYCL076W) vs. 0.001:DIX20 (PYCL076W)	-0.4004	-0,8142 to 0,01340	No	ns	0.0805
	0:PYCL076W vs. 10-3:PMFA1	-1.069	-1,741 to -0,3960	Yes	****	<0,0001															0:DIX20 (PYCL076W) vs. 0.001:DIX21 (PIME4)	0.1264	-0,5461 to 0,7989	No	ns	>0,9999					0:PYCL076W vs. 10-3:PMFA1	-0.04005	-0,2007 to 0,1206	No	ns	>0,9999					0:DIX20 (PYCL076W) vs. 0.001:DIX21 (PIME4)	0.2779	-0,3396 to 0,8954	No	ns	>0,9999
	0:PYCL076W vs. 10-3:PFIG1	-0.7809	-1,453 to -0,1085	Yes	**	0.0031															0:DIX20 (PYCL076W) vs. 0.001:DIX22 (PHPF1)	0.865	0,1925 to 1,537	Yes	***	0.0002					0:PYCL076W vs. 10-3:PFIG1	-0.1454	-0,3060 to 0,01526	No	ns	0.1831					0:DIX20 (PYCL076W) vs. 0.001:DIX22 (PHPF1)	-0.3111	-0,9286 to 0,3064	No	ns	>0,9999
	0:PYCL076W vs. 10-3:PAGA2	-1.127	-1,799 to -0,4544	Yes	****	<0,0001															0:DIX20 (PYCL076W) vs. 0.001:DIX23 (PCSS1)	0.716	0,04348 to 1,388	Yes	*	0.0177					0:PYCL076W vs. 10-3:PAGA2	-0.07033	-0,2310 to 0,09029	No	ns	>0,9999					0:DIX20 (PYCL076W) vs. 0.001:DIX23 (PCSS1)	0.4597	-0,1578 to 1,077	No	ns	0.7242
	0:PYCL076W vs. 10-3:PFUS1	-1.323	-1,995 to -0,6500	Yes	****	<0,0001															0:DIX20 (PYCL076W) vs. 0.001:DIX24 (PFUS1)	-0.741	-1,413 to -0,06852	Yes	**	0.0093					0:PYCL076W vs. 10-3:PFUS1	-0.1554	-0,3160 to 0,005228	No	ns	0.0807					0:DIX20 (PYCL076W) vs. 0.001:DIX24 (PFUS1)	-1.167	-1,785 to -0,5496	Yes	****	<0,0001
	0:PYCL076W vs. 10-3:PMFA2	-2.449	-3,121 to -1,776	Yes	****	<0,0001															0:DIX20 (PYCL076W) vs. 0.001:DIX25 (PFIG1)	-0.6655	-1,338 to 0,006976	No	ns	0.0584					0:PYCL076W vs. 10-3:PMFA2	-0.03455	-0,1952 to 0,1261	No	ns	>0,9999					0:DIX20 (PYCL076W) vs. 0.001:DIX25 (PFIG1)	-0.6356	-1,253 to -0,01806	Yes	*	0.0317
	0:PYCL076W vs. 10-2:PCSS1	-0.3299	-1,002 to 0,3426	No	ns	>0,9999															0:DIX20 (PYCL076W) vs. 0.01:DIX17 (PMFA2)	-0.6251	-1,298 to 0,04734	No	ns	0.1348					0:PYCL076W vs. 10-2:PCSS1	-0.4089	-0,5695 to -0,2482	Yes	****	<0,0001					0:DIX20 (PYCL076W) vs. 0.01:DIX17 (PMFA2)	-2.795	-3,413 to -2,178	Yes	****	<0,0001
	0:PYCL076W vs. 10-2:PIME4	-0.5441	-1,217 to 0,1284	No	ns	0.4789															0:DIX20 (PYCL076W) vs. 0.01:DIX18 (PMFA1)	-0.6399	-1,312 to 0,03264	No	ns	0.1008					0:PYCL076W vs. 10-2:PIME4	-0.4413	-0,6019 to -0,2807	Yes	****	<0,0001					0:DIX20 (PYCL076W) vs. 0.01:DIX18 (PMFA1)	-1.409	-2,027 to -0,7916	Yes	****	<0,0001
	0:PYCL076W vs. 10-2:PHPF1	-1.011	-1,683 to -0,3385	Yes	****	<0,0001															0:DIX20 (PYCL076W) vs. 0.01:DIX19 (PAGA2)	-0.9371	-1,610 to -0,2646	Yes	****	<0,0001					0:PYCL076W vs. 10-2:PHPF1	-0.3191	-0,4798 to -0,1585	Yes	****	<0,0001					0:DIX20 (PYCL076W) vs. 0.01:DIX19 (PAGA2)	-1.437	-2,055 to -0,8197	Yes	****	<0,0001
	0:PYCL076W vs. 10-2:PYCL076W	-1.191	-1,641 to -0,7400	Yes	****	<0,0001															0:DIX20 (PYCL076W) vs. 0.01:DIX20 (PYCL076W)	-1.191	-1,641 to -0,7400	Yes	****	<0,0001					0:PYCL076W vs. 10-2:PYCL076W	-0.4095	-0,5171 to -0,3019	Yes	****	<0,0001					0:DIX20 (PYCL076W) vs. 0.01:DIX20 (PYCL076W)	-0.7811	-1,195 to -0,3673	Yes	****	<0,0001
	0:PYCL076W vs. 10-2:PMFA1	-1.756	-2,429 to -1,084	Yes	****	<0,0001															0:DIX20 (PYCL076W) vs. 0.01:DIX21 (PIME4)	-0.5613	-1,234 to 0,1112	No	ns	0.3852					0:PYCL076W vs. 10-2:PMFA1	-0.3471	-0,5077 to -0,1865	Yes	****	<0,0001					0:DIX20 (PYCL076W) vs. 0.01:DIX21 (PIME4)	-0.1028	-0,7204 to 0,5147	No	ns	>0,9999
	0:PYCL076W vs. 10-2:PFIG1	-1.469	-2,141 to -0,7962	Yes	****	<0,0001															0:DIX20 (PYCL076W) vs. 0.01:DIX22 (PHPF1)	0.1772	-0,4953 to 0,8497	No	ns	>0,9999					0:PYCL076W vs. 10-2:PFIG1	-0.4524	-0,6130 to -0,2918	Yes	****	<0,0001					0:DIX20 (PYCL076W) vs. 0.01:DIX22 (PHPF1)	-0.6918	-1,309 to -0,07431	Yes	**	0.0066
	0:PYCL076W vs. 10-2:PAGA2	-1.815	-2,487 to -1,142	Yes	****	<0,0001															0:DIX20 (PYCL076W) vs. 0.01:DIX23 (PCSS1)	0.02823	-0,6443 to 0,7007	No	ns	>0,9999					0:PYCL076W vs. 10-2:PAGA2	-0.3774	-0,5380 to -0,2167	Yes	****	<0,0001					0:DIX20 (PYCL076W) vs. 0.01:DIX23 (PCSS1)	0.07901	-0,5385 to 0,6965	No	ns	>0,9999
	0:PYCL076W vs. 10-2:PFUS1	-2.01	-2,683 to -1,338	Yes	****	<0,0001															0:DIX20 (PYCL076W) vs. 0.01:DIX24 (PFUS1)	-1.429	-2,101 to -0,7563	Yes	****	<0,0001					0:PYCL076W vs. 10-2:PFUS1	-0.4624	-0,6231 to -0,3018	Yes	****	<0,0001					0:DIX20 (PYCL076W) vs. 0.01:DIX24 (PFUS1)	-1.548	-2,165 to -0,9303	Yes	****	<0,0001
	0:PYCL076W vs. 10-2:PMFA2	-3.137	-3,809 to -2,464	Yes	****	<0,0001															0:DIX20 (PYCL076W) vs. 0.01:DIX25 (PFIG1)	-1.353	-2,026 to -0,6808	Yes	****	<0,0001					0:PYCL076W vs. 10-2:PMFA2	-0.3416	-0,5022 to -0,1810	Yes	****	<0,0001					0:DIX20 (PYCL076W) vs. 0.01:DIX25 (PFIG1)	-1.016	-1,634 to -0,3988	Yes	****	<0,0001
	0:PYCL076W vs. 10-1:Neg.Con.	0.1265	-0,6773 to 0,9303	No	ns	>0,9999															0:DIX20 (PYCL076W) vs. 0.1:DIX14 (Neg.Con.)	-0.1336	-0,9374 to 0,6701	No	ns	>0,9999					0:PYCL076W vs. 10-1:Neg.Con.	-0.4491	-0,6411 to -0,2571	Yes	****	<0,0001					0:DIX20 (PYCL076W) vs. 0.1:DIX14 (Neg.Con.)	0.5756	-0,1625 to 1,314	No	ns	0.5917
	0:PYCL076W vs. 10-1:PPGK1	-2.201	-3,005 to -1,397	Yes	****	<0,0001															0:DIX20 (PYCL076W) vs. 0.1:DIX27 (PPGK1)	-0.1267	-0,9305 to 0,6770	No	ns	>0,9999					0:PYCL076W vs. 10-1:PPGK1	-0.4202	-0,6122 to -0,2282	Yes	****	<0,0001					0:DIX20 (PYCL076W) vs. 0.1:DIX27 (PPGK1)	-1.781	-2,519 to -1,043	Yes	****	<0,0001
	0:PYCL076W vs. 10-1:PTDH3	-3.145	-3,949 to -2,341	Yes	****	<0,0001															0:DIX20 (PYCL076W) vs. 0.1:DIX28 (PTDH3)	-0.1516	-0,9554 to 0,6522	No	ns	>0,9999					0:PYCL076W vs. 10-1:PTDH3	-0.4491	-0,6411 to -0,2571	Yes	****	<0,0001					0:DIX20 (PYCL076W) vs. 0.1:DIX28 (PTDH3)	-2.696	-3,434 to -1,958	Yes	****	<0,0001
	0:PYCL076W vs. 10-1:PCSS1	-0.4566	-1,101 to 0,1879	No	ns	0.8384															0:DIX20 (PYCL076W) vs. 0.1:DIX17 (PMFA2)	-0.7518	-1,396 to -0,1074	Yes	**	0.0028					0:PYCL076W vs. 10-1:PCSS1	-0.5334	-0,6873 to -0,3795	Yes	****	<0,0001					0:DIX20 (PYCL076W) vs. 0.1:DIX17 (PMFA2)	-2.797	-3,389 to -2,205	Yes	****	<0,0001
	0:PYCL076W vs. 10-1:PIME4	-0.6708	-1,315 to -0,02637	Yes	*	0.0262															0:DIX20 (PYCL076W) vs. 0.1:DIX18 (PMFA1)	-0.7666	-1,411 to -0,1221	Yes	**	0.0018					0:PYCL076W vs. 10-1:PIME4	-0.5658	-0,7198 to -0,4119	Yes	****	<0,0001					0:DIX20 (PYCL076W) vs. 0.1:DIX18 (PMFA1)	-1.411	-2,003 to -0,8195	Yes	****	<0,0001
	0:PYCL076W vs. 10-1:PHPF1	-1.138	-1,782 to -0,4932	Yes	****	<0,0001															0:DIX20 (PYCL076W) vs. 0.1:DIX19 (PAGA2)	-1.064	-1,708 to -0,4193	Yes	****	<0,0001					0:PYCL076W vs. 10-1:PHPF1	-0.4437	-0,5976 to -0,2897	Yes	****	<0,0001					0:DIX20 (PYCL076W) vs. 0.1:DIX19 (PAGA2)	-1.439	-2,031 to -0,8476	Yes	****	<0,0001
	0:PYCL076W vs. 10-1:PYCL076W	-1.317	-1,725 to -0,9097	Yes	****	<0,0001															0:DIX20 (PYCL076W) vs. 0.1:DIX20 (PYCL076W)	-1.317	-1,725 to -0,9097	Yes	****	<0,0001					0:PYCL076W vs. 10-1:PYCL076W	-0.5341	-0,6314 to -0,4367	Yes	****	<0,0001					0:DIX20 (PYCL076W) vs. 0.1:DIX20 (PYCL076W)	-0.7832	-1,158 to -0,4090	Yes	****	<0,0001
	0:PYCL076W vs. 10-1:PMFA1	-1.883	-2,527 to -1,238	Yes	****	<0,0001															0:DIX20 (PYCL076W) vs. 0.1:DIX21 (PIME4)	-0.688	-1,332 to -0,04357	Yes	*	0.0168					0:PYCL076W vs. 10-1:PMFA1	-0.4716	-0,6256 to -0,3177	Yes	****	<0,0001					0:DIX20 (PYCL076W) vs. 0.1:DIX21 (PIME4)	-0.105	-0,6968 to 0,4868	No	ns	>0,9999
	0:PYCL076W vs. 10-1:PFIG1	-1.595	-2,240 to -0,9509	Yes	****	<0,0001															0:DIX20 (PYCL076W) vs. 0.1:DIX22 (PHPF1)	0.05052	-0,5939 to 0,6950	No	ns	>0,9999					0:PYCL076W vs. 10-1:PFIG1	-0.5769	-0,7309 to -0,4230	Yes	****	<0,0001					0:DIX20 (PYCL076W) vs. 0.1:DIX22 (PHPF1)	-0.694	-1,286 to -0,1022	Yes	**	0.0025
	0:PYCL076W vs. 10-1:PAGA2	-1.941	-2,586 to -1,297	Yes	****	<0,0001															0:DIX20 (PYCL076W) vs. 0.1:DIX23 (PCSS1)	-0.09847	-0,7429 to 0,5460	No	ns	>0,9999					0:PYCL076W vs. 10-1:PAGA2	-0.5019	-0,6558 to -0,3480	Yes	****	<0,0001					0:DIX20 (PYCL076W) vs. 0.1:DIX23 (PCSS1)	0.07686	-0,5149 to 0,6686	No	ns	>0,9999
	0:PYCL076W vs. 10-1:PFUS1	-2.137	-2,781 to -1,493	Yes	****	<0,0001															0:DIX20 (PYCL076W) vs. 0.1:DIX24 (PFUS1)	-1.555	-2,200 to -0,9110	Yes	****	<0,0001					0:PYCL076W vs. 10-1:PFUS1	-0.587	-0,7409 to -0,4330	Yes	****	<0,0001					0:DIX20 (PYCL076W) vs. 0.1:DIX24 (PFUS1)	-1.55	-2,142 to -0,9582	Yes	****	<0,0001
	0:PYCL076W vs. 10-1:PMFA2	-3.263	-3,908 to -2,619	Yes	****	<0,0001															0:DIX20 (PYCL076W) vs. 0.1:DIX25 (PFIG1)	-1.48	-2,124 to -0,8355	Yes	****	<0,0001					0:PYCL076W vs. 10-1:PMFA2	-0.4661	-0,6201 to -0,3122	Yes	****	<0,0001					0:DIX20 (PYCL076W) vs. 0.1:DIX25 (PFIG1)	-1.018	-1,610 to -0,4267	Yes	****	<0,0001
	0:PYCL076W vs. 100:PCSS1	-0.6195	-1,292 to 0,05296	No	ns	0.1499															0:DIX20 (PYCL076W) vs. 1:DIX17 (PMFA2)	-0.9148	-1,587 to -0,2423	Yes	****	<0,0001					0:PYCL076W vs. 100:PCSS1	-0.5763	-0,7369 to -0,4156	Yes	****	<0,0001					0:DIX20 (PYCL076W) vs. 1:DIX17 (PMFA2)	-2.917	-3,535 to -2,300	Yes	****	<0,0001
	0:PYCL076W vs. 100:PIME4	-0.8338	-1,506 to -0,1613	Yes	***	0.0006															0:DIX20 (PYCL076W) vs. 1:DIX18 (PMFA1)	-0.9295	-1,602 to -0,2570	Yes	****	<0,0001					0:PYCL076W vs. 100:PIME4	-0.6087	-0,7693 to -0,4481	Yes	****	<0,0001					0:DIX20 (PYCL076W) vs. 1:DIX18 (PMFA1)	-1.531	-2,149 to -0,9139	Yes	****	<0,0001
	0:PYCL076W vs. 100:PHPF1	-1.301	-1,973 to -0,6281	Yes	****	<0,0001															0:DIX20 (PYCL076W) vs. 1:DIX19 (PAGA2)	-1.227	-1,899 to -0,5543	Yes	****	<0,0001					0:PYCL076W vs. 100:PHPF1	-0.4865	-0,6472 to -0,3259	Yes	****	<0,0001					0:DIX20 (PYCL076W) vs. 1:DIX19 (PAGA2)	-1.56	-2,177 to -0,9420	Yes	****	<0,0001
	0:PYCL076W vs. 100:PYCL076W	-1.48	-1,931 to -1,030	Yes	****	<0,0001															0:DIX20 (PYCL076W) vs. 1:DIX20 (PYCL076W)	-1.48	-1,931 to -1,030	Yes	****	<0,0001					0:PYCL076W vs. 100:PYCL076W	-0.5769	-0,6845 to -0,4693	Yes	****	<0,0001					0:DIX20 (PYCL076W) vs. 1:DIX20 (PYCL076W)	-0.9034	-1,317 to -0,4896	Yes	****	<0,0001
	0:PYCL076W vs. 100:PMFA1	-2.046	-2,718 to -1,373	Yes	****	<0,0001															0:DIX20 (PYCL076W) vs. 1:DIX21 (PIME4)	-0.851	-1,523 to -0,1785	Yes	***	0.0004					0:PYCL076W vs. 100:PMFA1	-0.5145	-0,6751 to -0,3539	Yes	****	<0,0001					0:DIX20 (PYCL076W) vs. 1:DIX21 (PIME4)	-0.2251	-0,8426 to 0,3924	No	ns	>0,9999
	0:PYCL076W vs. 100:PFIG1	-1.758	-2,431 to -1,086	Yes	****	<0,0001															0:DIX20 (PYCL076W) vs. 1:DIX22 (PHPF1)	-0.1125	-0,7849 to 0,5600	No	ns	>0,9999					0:PYCL076W vs. 100:PFIG1	-0.6198	-0,7804 to -0,4592	Yes	****	<0,0001					0:DIX20 (PYCL076W) vs. 1:DIX22 (PHPF1)	-0.8141	-1,432 to -0,1966	Yes	***	0.0001
	0:PYCL076W vs. 100:PAGA2	-2.104	-2,777 to -1,432	Yes	****	<0,0001															0:DIX20 (PYCL076W) vs. 1:DIX23 (PCSS1)	-0.2614	-0,9339 to 0,4110	No	ns	>0,9999					0:PYCL076W vs. 100:PAGA2	-0.5448	-0,7054 to -0,3841	Yes	****	<0,0001					0:DIX20 (PYCL076W) vs. 1:DIX23 (PCSS1)	-0.04327	-0,6608 to 0,5743	No	ns	>0,9999
	0:PYCL076W vs. 100:PFUS1	-2.3	-2,972 to -1,627	Yes	****	<0,0001															0:DIX20 (PYCL076W) vs. 1:DIX24 (PFUS1)	-1.718	-2,391 to -1,046	Yes	****	<0,0001					0:PYCL076W vs. 100:PFUS1	-0.6298	-0,7905 to -0,4692	Yes	****	<0,0001					0:DIX20 (PYCL076W) vs. 1:DIX24 (PFUS1)	-1.67	-2,288 to -1,053	Yes	****	<0,0001
	0:PYCL076W vs. 100:PMFA2	-3.426	-4,099 to -2,754	Yes	****	<0,0001															0:DIX20 (PYCL076W) vs. 1:DIX25 (PFIG1)	-1.643	-2,315 to -0,9704	Yes	****	<0,0001					0:PYCL076W vs. 100:PMFA2	-0.509	-0,6696 to -0,3484	Yes	****	<0,0001					0:DIX20 (PYCL076W) vs. 1:DIX25 (PFIG1)	-1.139	-1,756 to -0,5210	Yes	****	<0,0001
	0:PYCL076W vs. 101:PCSS1	-0.559	-1,232 to 0,1135	No	ns	0.3973															0:DIX20 (PYCL076W) vs. 10:DIX17 (PMFA2)	-0.8543	-1,527 to -0,1818	Yes	***	0.0003					0:PYCL076W vs. 101:PCSS1	-0.502	-0,6626 to -0,3414	Yes	****	<0,0001					0:DIX20 (PYCL076W) vs. 10:DIX17 (PMFA2)	-2.931	-3,549 to -2,314	Yes	****	<0,0001
	0:PYCL076W vs. 101:PIME4	-0.7733	-1,446 to -0,1008	Yes	**	0.0038															0:DIX20 (PYCL076W) vs. 10:DIX18 (PMFA1)	-0.869	-1,542 to -0,1965	Yes	***	0.0002					0:PYCL076W vs. 101:PIME4	-0.5344	-0,6951 to -0,3738	Yes	****	<0,0001					0:DIX20 (PYCL076W) vs. 10:DIX18 (PMFA1)	-1.545	-2,163 to -0,9277	Yes	****	<0,0001
	0:PYCL076W vs. 101:PHPF1	-1.24	-1,913 to -0,5676	Yes	****	<0,0001															0:DIX20 (PYCL076W) vs. 10:DIX19 (PAGA2)	-1.166	-1,839 to -0,4938	Yes	****	<0,0001					0:PYCL076W vs. 101:PHPF1	-0.4123	-0,5729 to -0,2516	Yes	****	<0,0001					0:DIX20 (PYCL076W) vs. 10:DIX19 (PAGA2)	-1.573	-2,191 to -0,9557	Yes	****	<0,0001
	0:PYCL076W vs. 101:PYCL076W	-1.42	-1,870 to -0,9692	Yes	****	<0,0001															0:DIX20 (PYCL076W) vs. 10:DIX20 (PYCL076W)	-1.42	-1,870 to -0,9692	Yes	****	<0,0001					0:PYCL076W vs. 101:PYCL076W	-0.5027	-0,6103 to -0,3950	Yes	****	<0,0001					0:DIX20 (PYCL076W) vs. 10:DIX20 (PYCL076W)	-0.9171	-1,331 to -0,5033	Yes	****	<0,0001
	0:PYCL076W vs. 101:PMFA1	-1.985	-2,658 to -1,313	Yes	****	<0,0001															0:DIX20 (PYCL076W) vs. 10:DIX21 (PIME4)	-0.7905	-1,463 to -0,1180	Yes	**	0.0024					0:PYCL076W vs. 101:PMFA1	-0.4402	-0,6008 to -0,2796	Yes	****	<0,0001					0:DIX20 (PYCL076W) vs. 10:DIX21 (PIME4)	-0.2389	-0,8564 to 0,3787	No	ns	>0,9999
	0:PYCL076W vs. 101:PFIG1	-1.698	-2,370 to -1,025	Yes	****	<0,0001															0:DIX20 (PYCL076W) vs. 10:DIX22 (PHPF1)	-0.05196	-0,7244 to 0,6205	No	ns	>0,9999					0:PYCL076W vs. 101:PFIG1	-0.5455	-0,7062 to -0,3849	Yes	****	<0,0001					0:DIX20 (PYCL076W) vs. 10:DIX22 (PHPF1)	-0.8279	-1,445 to -0,2103	Yes	****	<0,0001
	0:PYCL076W vs. 101:PAGA2	-2.044	-2,716 to -1,371	Yes	****	<0,0001															0:DIX20 (PYCL076W) vs. 10:DIX23 (PCSS1)	-0.2009	-0,8734 to 0,4715	No	ns	>0,9999					0:PYCL076W vs. 101:PAGA2	-0.4705	-0,6311 to -0,3099	Yes	****	<0,0001					0:DIX20 (PYCL076W) vs. 10:DIX23 (PCSS1)	-0.05702	-0,6745 to 0,5605	No	ns	>0,9999
	0:PYCL076W vs. 101:PFUS1	-2.239	-2,912 to -1,567	Yes	****	<0,0001															0:DIX20 (PYCL076W) vs. 10:DIX24 (PFUS1)	-1.658	-2,330 to -0,9854	Yes	****	<0,0001					0:PYCL076W vs. 101:PFUS1	-0.5556	-0,7162 to -0,3949	Yes	****	<0,0001					0:DIX20 (PYCL076W) vs. 10:DIX24 (PFUS1)	-1.684	-2,301 to -1,066	Yes	****	<0,0001
	0:PYCL076W vs. 101:PMFA2	-3.366	-4,038 to -2,693	Yes	****	<0,0001															0:DIX20 (PYCL076W) vs. 10:DIX25 (PFIG1)	-1.582	-2,255 to -0,9099	Yes	****	<0,0001					0:PYCL076W vs. 101:PMFA2	-0.4347	-0,5954 to -0,2741	Yes	****	<0,0001					0:DIX20 (PYCL076W) vs. 10:DIX25 (PFIG1)	-1.152	-1,770 to -0,5348	Yes	****	<0,0001
	0:PYCL076W vs. 102:Neg.Con.	0.08856	-0,7152 to 0,8923	No	ns	>0,9999															0:DIX20 (PYCL076W) vs. 100:DIX14 (Neg.Con.)	-0.1715	-0,9753 to 0,6322	No	ns	>0,9999					0:PYCL076W vs. 102:Neg.Con.	-0.4361	-0,6280 to -0,2441	Yes	****	<0,0001					0:DIX20 (PYCL076W) vs. 100:DIX14 (Neg.Con.)	0.5246	-0,2135 to 1,263	No	ns	0.8318
	0:PYCL076W vs. 102:PPGK1	-2.239	-3,042 to -1,435	Yes	****	<0,0001															0:DIX20 (PYCL076W) vs. 100:DIX27 (PPGK1)	-0.1647	-0,9684 to 0,6391	No	ns	>0,9999					0:PYCL076W vs. 102:PPGK1	-0.4071	-0,5991 to -0,2151	Yes	****	<0,0001					0:DIX20 (PYCL076W) vs. 100:DIX27 (PPGK1)	-1.832	-2,570 to -1,093	Yes	****	<0,0001
	0:PYCL076W vs. 102:PTDH3	-3.183	-3,987 to -2,379	Yes	****	<0,0001															0:DIX20 (PYCL076W) vs. 100:DIX28 (PTDH3)	-0.1895	-0,9933 to 0,6143	No	ns	>0,9999					0:PYCL076W vs. 102:PTDH3	-0.436	-0,6280 to -0,2440	Yes	****	<0,0001					0:DIX20 (PYCL076W) vs. 100:DIX28 (PTDH3)	-2.747	-3,485 to -2,009	Yes	****	<0,0001
	0:PYCL076W vs. 102:PCSS1	-0.4945	-1,139 to 0,1500	No	ns	0.6401															0:DIX20 (PYCL076W) vs. 100:DIX17 (PMFA2)	-0.7898	-1,434 to -0,1453	Yes	***	0.0009					0:PYCL076W vs. 102:PCSS1	-0.5203	-0,6743 to -0,3664	Yes	****	<0,0001					0:DIX20 (PYCL076W) vs. 100:DIX17 (PMFA2)	-2.848	-3,440 to -2,256	Yes	****	<0,0001
	0:PYCL076W vs. 102:PIME4	-0.7087	-1,353 to -0,06429	Yes	**	0.0096															0:DIX20 (PYCL076W) vs. 100:DIX18 (PMFA1)	-0.8045	-1,449 to -0,1600	Yes	***	0.0005					0:PYCL076W vs. 102:PIME4	-0.5528	-0,7067 to -0,3988	Yes	****	<0,0001					0:DIX20 (PYCL076W) vs. 100:DIX18 (PMFA1)	-1.462	-2,054 to -0,8705	Yes	****	<0,0001
	0:PYCL076W vs. 102:PHPF1	-1.176	-1,820 to -0,5311	Yes	****	<0,0001															0:DIX20 (PYCL076W) vs. 100:DIX19 (PAGA2)	-1.102	-1,746 to -0,4572	Yes	****	<0,0001					0:PYCL076W vs. 102:PHPF1	-0.4306	-0,5845 to -0,2767	Yes	****	<0,0001					0:DIX20 (PYCL076W) vs. 100:DIX19 (PAGA2)	-1.49	-2,082 to -0,8986	Yes	****	<0,0001
	0:PYCL076W vs. 102:PYCL076W	-1.355	-1,763 to -0,9476	Yes	****	<0,0001															0:DIX20 (PYCL076W) vs. 100:DIX20 (PYCL076W)	-1.355	-1,763 to -0,9476	Yes	****	<0,0001					0:PYCL076W vs. 102:PYCL076W	-0.521	-0,6183 to -0,4236	Yes	****	<0,0001					0:DIX20 (PYCL076W) vs. 100:DIX20 (PYCL076W)	-0.8342	-1,208 to -0,4600	Yes	****	<0,0001
	0:PYCL076W vs. 102:PMFA1	-1.921	-2,565 to -1,276	Yes	****	<0,0001															0:DIX20 (PYCL076W) vs. 100:DIX21 (PIME4)	-0.7259	-1,370 to -0,08149	Yes	**	0.0059					0:PYCL076W vs. 102:PMFA1	-0.4586	-0,6125 to -0,3046	Yes	****	<0,0001					0:DIX20 (PYCL076W) vs. 100:DIX21 (PIME4)	-0.156	-0,7478 to 0,4358	No	ns	>0,9999
	0:PYCL076W vs. 102:PFIG1	-1.633	-2,278 to -0,9888	Yes	****	<0,0001															0:DIX20 (PYCL076W) vs. 100:DIX22 (PHPF1)	0.0126	-0,6319 to 0,6571	No	ns	>0,9999					0:PYCL076W vs. 102:PFIG1	-0.5639	-0,7178 to -0,4099	Yes	****	<0,0001					0:DIX20 (PYCL076W) vs. 100:DIX22 (PHPF1)	-0.745	-1,337 to -0,1532	Yes	***	0.0004
	0:PYCL076W vs. 102:PAGA2	-1.979	-2,624 to -1,335	Yes	****	<0,0001															0:DIX20 (PYCL076W) vs. 100:DIX23 (PCSS1)	-0.1364	-0,7808 to 0,5081	No	ns	>0,9999					0:PYCL076W vs. 102:PAGA2	-0.4888	-0,6428 to -0,3349	Yes	****	<0,0001					0:DIX20 (PYCL076W) vs. 100:DIX23 (PCSS1)	0.02587	-0,5659 to 0,6176	No	ns	>0,9999
	0:PYCL076W vs. 102:PFUS1	-2.175	-2,819 to -1,530	Yes	****	<0,0001															0:DIX20 (PYCL076W) vs. 100:DIX24 (PFUS1)	-1.593	-2,238 to -0,9489	Yes	****	<0,0001					0:PYCL076W vs. 102:PFUS1	-0.5739	-0,7278 to -0,4200	Yes	****	<0,0001					0:DIX20 (PYCL076W) vs. 100:DIX24 (PFUS1)	-1.601	-2,193 to -1,009	Yes	****	<0,0001
	0:PYCL076W vs. 102:PMFA2	-3.301	-3,946 to -2,657	Yes	****	<0,0001															0:DIX20 (PYCL076W) vs. 100:DIX25 (PFIG1)	-1.518	-2,162 to -0,8734	Yes	****	<0,0001					0:PYCL076W vs. 102:PMFA2	-0.4531	-0,6070 to -0,2991	Yes	****	<0,0001					0:DIX20 (PYCL076W) vs. 100:DIX25 (PFIG1)	-1.069	-1,661 to -0,4777	Yes	****	<0,0001
	0:PMFA1 vs. 0:PFIG1	0.2876	-0,2116 to 0,7868	No	ns	0.9962															0:DIX21 (PIME4) vs. 0:DIX22 (PHPF1)	0.7385	0,2394 to 1,238	Yes	****	<0,0001					0:PMFA1 vs. 0:PFIG1	-0.1053	-0,2245 to 0,01392	No	ns	0.2355					0:DIX21 (PIME4) vs. 0:DIX22 (PHPF1)	-0.589	-1,047 to -0,1306	Yes	***	0.0003
	0:PMFA1 vs. 0:PAGA2	-0.05835	-0,5575 to 0,4408	No	ns	>0,9999															0:DIX21 (PIME4) vs. 0:DIX23 (PCSS1)	0.5896	0,09036 to 1,089	Yes	**	0.0021					0:PMFA1 vs. 0:PAGA2	-0.03028	-0,1495 to 0,08895	No	ns	>0,9999					0:DIX21 (PIME4) vs. 0:DIX23 (PCSS1)	0.1818	-0,2765 to 0,6402	No	ns	>0,9999
	0:PMFA1 vs. 0:PFUS1	-0.254	-0,7532 to 0,2452	No	ns	0.9999															0:DIX21 (PIME4) vs. 0:DIX24 (PFUS1)	-0.8674	-1,367 to -0,3682	Yes	****	<0,0001					0:PMFA1 vs. 0:PFUS1	-0.1153	-0,2346 to 0,003885	No	ns	0.0807					0:DIX21 (PIME4) vs. 0:DIX24 (PFUS1)	-1.445	-1,903 to -0,9866	Yes	****	<0,0001
	0:PMFA1 vs. 0:PMFA2	-1.38	-1,880 to -0,8812	Yes	****	<0,0001															0:DIX21 (PIME4) vs. 0:DIX25 (PFIG1)	-0.7919	-1,291 to -0,2927	Yes	****	<0,0001					0:PMFA1 vs. 0:PMFA2	0.005498	-0,1137 to 0,1247	No	ns	>0,9999					0:DIX21 (PIME4) vs. 0:DIX25 (PFIG1)	-0.9135	-1,372 to -0,4551	Yes	****	<0,0001
	0:PMFA1 vs. 10-4:PCSS1	1.509	0,8363 to 2,181	Yes	****	<0,0001															0:DIX21 (PIME4) vs. 0.0001:DIX17 (PMFA2)	0.01861	-0,6539 to 0,6911	No	ns	>0,9999					0:PMFA1 vs. 10-4:PCSS1	-0.03743	-0,1981 to 0,1232	No	ns	>0,9999					0:DIX21 (PIME4) vs. 0.0001:DIX17 (PMFA2)	-2.634	-3,252 to -2,017	Yes	****	<0,0001
	0:PMFA1 vs. 10-4:PIME4	1.295	0,6221 to 1,967	Yes	****	<0,0001															0:DIX21 (PIME4) vs. 0.0001:DIX18 (PMFA1)	0.0039	-0,6686 to 0,6764	No	ns	>0,9999					0:PMFA1 vs. 10-4:PIME4	-0.06986	-0,2305 to 0,09076	No	ns	>0,9999					0:DIX21 (PIME4) vs. 0.0001:DIX18 (PMFA1)	-1.248	-1,866 to -0,6307	Yes	****	<0,0001
	0:PMFA1 vs. 10-4:PHPF1	0.8277	0,1552 to 1,500	Yes	***	0.0008															0:DIX21 (PIME4) vs. 0.0001:DIX19 (PAGA2)	-0.2933	-0,9658 to 0,3792	No	ns	>0,9999					0:PMFA1 vs. 10-4:PHPF1	0.05231	-0,1083 to 0,2129	No	ns	>0,9999					0:DIX21 (PIME4) vs. 0.0001:DIX19 (PAGA2)	-1.276	-1,894 to -0,6588	Yes	****	<0,0001
	0:PMFA1 vs. 10-4:PYCL076W	0.6481	-0,02441 to 1,321	No	ns	0.085															0:DIX21 (PIME4) vs. 0.0001:DIX20 (PYCL076W)	-0.5468	-1,219 to 0,1256	No	ns	0.4636					0:PMFA1 vs. 10-4:PYCL076W	-0.03808	-0,1987 to 0,1225	No	ns	>0,9999					0:DIX21 (PIME4) vs. 0.0001:DIX20 (PYCL076W)	-0.6202	-1,238 to -0,002662	Yes	*	0.0468
	0:PMFA1 vs. 10-4:PMFA1	0.08242	-0,3682 to 0,5330	No	ns	>0,9999															0:DIX21 (PIME4) vs. 0.0001:DIX21 (PIME4)	0.08242	-0,3682 to 0,5330	No	ns	>0,9999					0:PMFA1 vs. 10-4:PMFA1	0.02435	-0,08328 to 0,1320	No	ns	>0,9999					0:DIX21 (PIME4) vs. 0.0001:DIX21 (PIME4)	0.05807	-0,3557 to 0,4718	No	ns	>0,9999
	0:PMFA1 vs. 10-4:PFIG1	0.37	-0,3025 to 1,042	No	ns	0.9988															0:DIX21 (PIME4) vs. 0.0001:DIX22 (PHPF1)	0.821	0,1485 to 1,493	Yes	***	0.001					0:PMFA1 vs. 10-4:PFIG1	-0.08096	-0,2416 to 0,07966	No	ns	>0,9999					0:DIX21 (PIME4) vs. 0.0001:DIX22 (PHPF1)	-0.5309	-1,148 to 0,08659	No	ns	0.3025
	0:PMFA1 vs. 10-4:PAGA2	0.02408	-0,6484 to 0,6966	No	ns	>0,9999															0:DIX21 (PIME4) vs. 0.0001:DIX23 (PCSS1)	0.672	-0,0005069 to 1,344	No	ns	0.0506					0:PMFA1 vs. 10-4:PAGA2	-0.005932	-0,1666 to 0,1547	No	ns	>0,9999					0:DIX21 (PIME4) vs. 0.0001:DIX23 (PCSS1)	0.2399	-0,3776 to 0,8574	No	ns	>0,9999
	0:PMFA1 vs. 10-4:PFUS1	-0.1716	-0,8441 to 0,5009	No	ns	>0,9999															0:DIX21 (PIME4) vs. 0.0001:DIX24 (PFUS1)	-0.785	-1,457 to -0,1125	Yes	**	0.0028					0:PMFA1 vs. 10-4:PFUS1	-0.091	-0,2516 to 0,06963	No	ns	0.9975					0:DIX21 (PIME4) vs. 0.0001:DIX24 (PFUS1)	-1.387	-2,004 to -0,7694	Yes	****	<0,0001
	0:PMFA1 vs. 10-4:PMFA2	-1.298	-1,970 to -0,6255	Yes	****	<0,0001															0:DIX21 (PIME4) vs. 0.0001:DIX25 (PFIG1)	-0.7095	-1,382 to -0,03701	Yes	*	0.0208					0:PMFA1 vs. 10-4:PMFA2	0.02985	-0,1308 to 0,1905	No	ns	>0,9999					0:DIX21 (PIME4) vs. 0.0001:DIX25 (PFIG1)	-0.8554	-1,473 to -0,2379	Yes	****	<0,0001
	0:PMFA1 vs. 10-3:PCSS1	0.9235	0,2511 to 1,596	Yes	****	<0,0001															0:DIX21 (PIME4) vs. 0.001:DIX17 (PMFA2)	-0.5667	-1,239 to 0,1058	No	ns	0.3579					0:PMFA1 vs. 10-3:PCSS1	-0.1643	-0,3249 to -0,003638	Yes	*	0.0352					0:DIX21 (PIME4) vs. 0.001:DIX17 (PMFA2)	-3.093	-3,710 to -2,475	Yes	****	<0,0001
	0:PMFA1 vs. 10-3:PIME4	0.7093	0,03678 to 1,382	Yes	*	0.0209															0:DIX21 (PIME4) vs. 0.001:DIX18 (PMFA1)	-0.5814	-1,254 to 0,09111	No	ns	0.2881					0:PMFA1 vs. 10-3:PIME4	-0.1967	-0,3573 to -0,03607	Yes	***	0.0009					0:DIX21 (PIME4) vs. 0.001:DIX18 (PMFA1)	-1.707	-2,324 to -1,089	Yes	****	<0,0001
	0:PMFA1 vs. 10-3:PHPF1	0.2424	-0,4300 to 0,9149	No	ns	>0,9999															0:DIX21 (PIME4) vs. 0.001:DIX19 (PAGA2)	-0.8786	-1,551 to -0,2061	Yes	***	0.0002					0:PMFA1 vs. 10-3:PHPF1	-0.07452	-0,2351 to 0,08610	No	ns	>0,9999					0:DIX21 (PIME4) vs. 0.001:DIX19 (PAGA2)	-1.735	-2,352 to -1,117	Yes	****	<0,0001
	0:PMFA1 vs. 10-3:PYCL076W	0.0628	-0,6097 to 0,7353	No	ns	>0,9999															0:DIX21 (PIME4) vs. 0.001:DIX20 (PYCL076W)	-1.132	-1,805 to -0,4596	Yes	****	<0,0001					0:PMFA1 vs. 10-3:PYCL076W	-0.1649	-0,3255 to -0,004281	Yes	*	0.033					0:DIX21 (PIME4) vs. 0.001:DIX20 (PYCL076W)	-1.079	-1,696 to -0,4611	Yes	****	<0,0001
	0:PMFA1 vs. 10-3:PMFA1	-0.5029	-0,9535 to -0,05224	Yes	**	0.0072															0:DIX21 (PIME4) vs. 0.001:DIX21 (PIME4)	-0.5029	-0,9535 to -0,05224	Yes	**	0.0072					0:PMFA1 vs. 10-3:PMFA1	-0.1025	-0,2101 to 0,005151	No	ns	0.0998					0:DIX21 (PIME4) vs. 0.001:DIX21 (PIME4)	-0.4004	-0,8142 to 0,01340	No	ns	0.0805
	0:PMFA1 vs. 10-3:PFIG1	-0.2153	-0,8878 to 0,4572	No	ns	>0,9999															0:DIX21 (PIME4) vs. 0.001:DIX22 (PHPF1)	0.2357	-0,4368 to 0,9082	No	ns	>0,9999					0:PMFA1 vs. 10-3:PFIG1	-0.2078	-0,3684 to -0,04717	Yes	***	0.0002					0:DIX21 (PIME4) vs. 0.001:DIX22 (PHPF1)	-0.9894	-1,607 to -0,3719	Yes	****	<0,0001
	0:PMFA1 vs. 10-3:PAGA2	-0.5612	-1,234 to 0,1113	No	ns	0.3859															0:DIX21 (PIME4) vs. 0.001:DIX23 (PCSS1)	0.08671	-0,5858 to 0,7592	No	ns	>0,9999					0:PMFA1 vs. 10-3:PAGA2	-0.1328	-0,2934 to 0,02786	No	ns	0.4143					0:DIX21 (PIME4) vs. 0.001:DIX23 (PCSS1)	-0.2185	-0,8361 to 0,3990	No	ns	>0,9999
	0:PMFA1 vs. 10-3:PFUS1	-0.7569	-1,429 to -0,08438	Yes	**	0.006															0:DIX21 (PIME4) vs. 0.001:DIX24 (PFUS1)	-1.37	-2,043 to -0,6978	Yes	****	<0,0001					0:PMFA1 vs. 10-3:PFUS1	-0.2178	-0,3785 to -0,05720	Yes	****	<0,0001					0:DIX21 (PIME4) vs. 0.001:DIX24 (PFUS1)	-1.845	-2,463 to -1,228	Yes	****	<0,0001
	0:PMFA1 vs. 10-3:PMFA2	-1.883	-2,556 to -1,211	Yes	****	<0,0001															0:DIX21 (PIME4) vs. 0.001:DIX25 (PFIG1)	-1.295	-1,967 to -0,6223	Yes	****	<0,0001					0:PMFA1 vs. 10-3:PMFA2	-0.09698	-0,2576 to 0,06365	No	ns	0.9887					0:DIX21 (PIME4) vs. 0.001:DIX25 (PFIG1)	-1.314	-1,931 to -0,6963	Yes	****	<0,0001
	0:PMFA1 vs. 10-2:PCSS1	0.2358	-0,4367 to 0,9083	No	ns	>0,9999															0:DIX21 (PIME4) vs. 0.01:DIX17 (PMFA2)	-1.254	-1,927 to -0,5819	Yes	****	<0,0001					0:PMFA1 vs. 10-2:PCSS1	-0.4713	-0,6319 to -0,3107	Yes	****	<0,0001					0:DIX21 (PIME4) vs. 0.01:DIX17 (PMFA2)	-3.473	-4,091 to -2,856	Yes	****	<0,0001
	0:PMFA1 vs. 10-2:PIME4	0.02153	-0,6510 to 0,6940	No	ns	>0,9999															0:DIX21 (PIME4) vs. 0.01:DIX18 (PMFA1)	-1.269	-1,942 to -0,5966	Yes	****	<0,0001					0:PMFA1 vs. 10-2:PIME4	-0.5037	-0,6644 to -0,3431	Yes	****	<0,0001					0:DIX21 (PIME4) vs. 0.01:DIX18 (PMFA1)	-2.087	-2,705 to -1,470	Yes	****	<0,0001
	0:PMFA1 vs. 10-2:PHPF1	-0.4453	-1,118 to 0,2272	No	ns	0.9369															0:DIX21 (PIME4) vs. 0.01:DIX19 (PAGA2)	-1.566	-2,239 to -0,8938	Yes	****	<0,0001					0:PMFA1 vs. 10-2:PHPF1	-0.3816	-0,5422 to -0,2209	Yes	****	<0,0001					0:DIX21 (PIME4) vs. 0.01:DIX19 (PAGA2)	-2.115	-2,733 to -1,498	Yes	****	<0,0001
	0:PMFA1 vs. 10-2:PYCL076W	-0.6249	-1,297 to 0,04755	No	ns	0.1353															0:DIX21 (PIME4) vs. 0.01:DIX20 (PYCL076W)	-1.82	-2,492 to -1,147	Yes	****	<0,0001					0:PMFA1 vs. 10-2:PYCL076W	-0.4719	-0,6326 to -0,3113	Yes	****	<0,0001					0:DIX21 (PIME4) vs. 0.01:DIX20 (PYCL076W)	-1.459	-2,077 to -0,8418	Yes	****	<0,0001
	0:PMFA1 vs. 10-2:PMFA1	-1.191	-1,641 to -0,7400	Yes	****	<0,0001															0:DIX21 (PIME4) vs. 0.01:DIX21 (PIME4)	-1.191	-1,641 to -0,7400	Yes	****	<0,0001					0:PMFA1 vs. 10-2:PMFA1	-0.4095	-0,5171 to -0,3019	Yes	****	<0,0001					0:DIX21 (PIME4) vs. 0.01:DIX21 (PIME4)	-0.7811	-1,195 to -0,3673	Yes	****	<0,0001
	0:PMFA1 vs. 10-2:PFIG1	-0.903	-1,576 to -0,2305	Yes	****	<0,0001															0:DIX21 (PIME4) vs. 0.01:DIX22 (PHPF1)	-0.452	-1,125 to 0,2204	No	ns	0.9204					0:PMFA1 vs. 10-2:PFIG1	-0.5148	-0,6754 to -0,3542	Yes	****	<0,0001					0:DIX21 (PIME4) vs. 0.01:DIX22 (PHPF1)	-1.37	-1,988 to -0,7526	Yes	****	<0,0001
	0:PMFA1 vs. 10-2:PAGA2	-1.249	-1,921 to -0,5764	Yes	****	<0,0001															0:DIX21 (PIME4) vs. 0.01:DIX23 (PCSS1)	-0.601	-1,274 to 0,07146	No	ns	0.209					0:PMFA1 vs. 10-2:PAGA2	-0.4398	-0,6004 to -0,2792	Yes	****	<0,0001					0:DIX21 (PIME4) vs. 0.01:DIX23 (PCSS1)	-0.5992	-1,217 to 0,01828	No	ns	0.0774
	0:PMFA1 vs. 10-2:PFUS1	-1.445	-2,117 to -0,7721	Yes	****	<0,0001															0:DIX21 (PIME4) vs. 0.01:DIX24 (PFUS1)	-2.058	-2,731 to -1,386	Yes	****	<0,0001					0:PMFA1 vs. 10-2:PFUS1	-0.5249	-0,6855 to -0,3642	Yes	****	<0,0001					0:DIX21 (PIME4) vs. 0.01:DIX24 (PFUS1)	-2.226	-2,844 to -1,609	Yes	****	<0,0001
	0:PMFA1 vs. 10-2:PMFA2	-2.571	-3,243 to -1,898	Yes	****	<0,0001															0:DIX21 (PIME4) vs. 0.01:DIX25 (PFIG1)	-1.983	-2,655 to -1,310	Yes	****	<0,0001					0:PMFA1 vs. 10-2:PMFA2	-0.404	-0,5646 to -0,2434	Yes	****	<0,0001					0:DIX21 (PIME4) vs. 0.01:DIX25 (PFIG1)	-1.695	-2,312 to -1,077	Yes	****	<0,0001
	0:PMFA1 vs. 10-1:Neg.Con.	0.6921	-0,1116 to 1,496	No	ns	0.2985															0:DIX21 (PIME4) vs. 0.1:DIX14 (Neg.Con.)	-0.7629	-1,567 to 0,04088	No	ns	0.104					0:PMFA1 vs. 10-1:Neg.Con.	-0.5115	-0,7035 to -0,3196	Yes	****	<0,0001					0:DIX21 (PIME4) vs. 0.1:DIX14 (Neg.Con.)	-0.1026	-0,8407 to 0,6354	No	ns	>0,9999
	0:PMFA1 vs. 10-1:PPGK1	-1.635	-2,439 to -0,8313	Yes	****	<0,0001															0:DIX21 (PIME4) vs. 0.1:DIX27 (PPGK1)	-0.756	-1,560 to 0,04777	No	ns	0.1167					0:PMFA1 vs. 10-1:PPGK1	-0.4826	-0,6746 to -0,2906	Yes	****	<0,0001					0:DIX21 (PIME4) vs. 0.1:DIX27 (PPGK1)	-2.459	-3,197 to -1,721	Yes	****	<0,0001
	0:PMFA1 vs. 10-1:PTDH3	-2.579	-3,383 to -1,776	Yes	****	<0,0001															0:DIX21 (PIME4) vs. 0.1:DIX28 (PTDH3)	-0.7808	-1,585 to 0,02293	No	ns	0.0762					0:PMFA1 vs. 10-1:PTDH3	-0.5115	-0,7035 to -0,3195	Yes	****	<0,0001					0:DIX21 (PIME4) vs. 0.1:DIX28 (PTDH3)	-3.374	-4,112 to -2,636	Yes	****	<0,0001
	0:PMFA1 vs. 10-1:PCSS1	0.1091	-0,5354 to 0,7536	No	ns	>0,9999															0:DIX21 (PIME4) vs. 0.1:DIX17 (PMFA2)	-1.381	-2,026 to -0,7367	Yes	****	<0,0001					0:PMFA1 vs. 10-1:PCSS1	-0.5958	-0,7498 to -0,4419	Yes	****	<0,0001					0:DIX21 (PIME4) vs. 0.1:DIX17 (PMFA2)	-3.475	-4,067 to -2,884	Yes	****	<0,0001
	0:PMFA1 vs. 10-1:PIME4	-0.1052	-0,7496 to 0,5393	No	ns	>0,9999															0:DIX21 (PIME4) vs. 0.1:DIX18 (PMFA1)	-1.396	-2,040 to -0,7514	Yes	****	<0,0001					0:PMFA1 vs. 10-1:PIME4	-0.6283	-0,7822 to -0,4743	Yes	****	<0,0001					0:DIX21 (PIME4) vs. 0.1:DIX18 (PMFA1)	-2.09	-2,681 to -1,498	Yes	****	<0,0001
	0:PMFA1 vs. 10-1:PHPF1	-0.572	-1,216 to 0,07246	No	ns	0.2244															0:DIX21 (PIME4) vs. 0.1:DIX19 (PAGA2)	-1.693	-2,337 to -1,049	Yes	****	<0,0001					0:PMFA1 vs. 10-1:PHPF1	-0.5061	-0,6600 to -0,3522	Yes	****	<0,0001					0:DIX21 (PIME4) vs. 0.1:DIX19 (PAGA2)	-2.118	-2,709 to -1,526	Yes	****	<0,0001
	0:PMFA1 vs. 10-1:PYCL076W	-0.7516	-1,396 to -0,1072	Yes	**	0.0028															0:DIX21 (PIME4) vs. 0.1:DIX20 (PYCL076W)	-1.947	-2,591 to -1,302	Yes	****	<0,0001					0:PMFA1 vs. 10-1:PYCL076W	-0.5965	-0,7504 to -0,4426	Yes	****	<0,0001					0:DIX21 (PIME4) vs. 0.1:DIX20 (PYCL076W)	-1.461	-2,053 to -0,8697	Yes	****	<0,0001
	0:PMFA1 vs. 10-1:PMFA1	-1.317	-1,725 to -0,9097	Yes	****	<0,0001															0:DIX21 (PIME4) vs. 0.1:DIX21 (PIME4)	-1.317	-1,725 to -0,9097	Yes	****	<0,0001					0:PMFA1 vs. 10-1:PMFA1	-0.5341	-0,6314 to -0,4367	Yes	****	<0,0001					0:DIX21 (PIME4) vs. 0.1:DIX21 (PIME4)	-0.7832	-1,158 to -0,4090	Yes	****	<0,0001
	0:PMFA1 vs. 10-1:PFIG1	-1.03	-1,674 to -0,3853	Yes	****	<0,0001															0:DIX21 (PIME4) vs. 0.1:DIX22 (PHPF1)	-0.5787	-1,223 to 0,06571	No	ns	0.1988					0:PMFA1 vs. 10-1:PFIG1	-0.6394	-0,7933 to -0,4854	Yes	****	<0,0001					0:DIX21 (PIME4) vs. 0.1:DIX22 (PHPF1)	-1.372	-1,964 to -0,7805	Yes	****	<0,0001
	0:PMFA1 vs. 10-1:PAGA2	-1.376	-2,020 to -0,7312	Yes	****	<0,0001															0:DIX21 (PIME4) vs. 0.1:DIX23 (PCSS1)	-0.7277	-1,372 to -0,08328	Yes	**	0.0056					0:PMFA1 vs. 10-1:PAGA2	-0.5643	-0,7183 to -0,4104	Yes	****	<0,0001					0:DIX21 (PIME4) vs. 0.1:DIX23 (PCSS1)	-0.6014	-1,193 to -0,009616	Yes	*	0.0389
	0:PMFA1 vs. 10-1:PFUS1	-1.571	-2,216 to -0,9269	Yes	****	<0,0001															0:DIX21 (PIME4) vs. 0.1:DIX24 (PFUS1)	-2.185	-2,829 to -1,540	Yes	****	<0,0001					0:PMFA1 vs. 10-1:PFUS1	-0.6494	-0,8033 to -0,4955	Yes	****	<0,0001					0:DIX21 (PIME4) vs. 0.1:DIX24 (PFUS1)	-2.228	-2,820 to -1,636	Yes	****	<0,0001
	0:PMFA1 vs. 10-1:PMFA2	-2.698	-3,342 to -2,053	Yes	****	<0,0001															0:DIX21 (PIME4) vs. 0.1:DIX25 (PFIG1)	-2.109	-2,754 to -1,465	Yes	****	<0,0001					0:PMFA1 vs. 10-1:PMFA2	-0.5286	-0,6825 to -0,3746	Yes	****	<0,0001					0:DIX21 (PIME4) vs. 0.1:DIX25 (PFIG1)	-1.697	-2,288 to -1,105	Yes	****	<0,0001
	0:PMFA1 vs. 100:PCSS1	-0.05388	-0,7264 to 0,6186	No	ns	>0,9999															0:DIX21 (PIME4) vs. 1:DIX17 (PMFA2)	-1.544	-2,217 to -0,8716	Yes	****	<0,0001					0:PMFA1 vs. 100:PCSS1	-0.6387	-0,7993 to -0,4781	Yes	****	<0,0001					0:DIX21 (PIME4) vs. 1:DIX17 (PMFA2)	-3.596	-4,213 to -2,978	Yes	****	<0,0001
	0:PMFA1 vs. 100:PIME4	-0.2681	-0,9406 to 0,4043	No	ns	>0,9999															0:DIX21 (PIME4) vs. 1:DIX18 (PMFA1)	-1.559	-2,231 to -0,8863	Yes	****	<0,0001					0:PMFA1 vs. 100:PIME4	-0.6711	-0,8318 to -0,5105	Yes	****	<0,0001					0:DIX21 (PIME4) vs. 1:DIX18 (PMFA1)	-2.21	-2,827 to -1,592	Yes	****	<0,0001
	0:PMFA1 vs. 100:PHPF1	-0.735	-1,407 to -0,06248	Yes	*	0.0108															0:DIX21 (PIME4) vs. 1:DIX19 (PAGA2)	-1.856	-2,529 to -1,184	Yes	****	<0,0001					0:PMFA1 vs. 100:PHPF1	-0.549	-0,7096 to -0,3883	Yes	****	<0,0001					0:DIX21 (PIME4) vs. 1:DIX19 (PAGA2)	-2.238	-2,855 to -1,620	Yes	****	<0,0001
	0:PMFA1 vs. 100:PYCL076W	-0.9146	-1,587 to -0,2421	Yes	****	<0,0001															0:DIX21 (PIME4) vs. 1:DIX20 (PYCL076W)	-2.11	-2,782 to -1,437	Yes	****	<0,0001					0:PMFA1 vs. 100:PYCL076W	-0.6393	-0,8000 to -0,4787	Yes	****	<0,0001					0:DIX21 (PIME4) vs. 1:DIX20 (PYCL076W)	-1.582	-2,199 to -0,9641	Yes	****	<0,0001
	0:PMFA1 vs. 100:PMFA1	-1.48	-1,931 to -1,030	Yes	****	<0,0001															0:DIX21 (PIME4) vs. 1:DIX21 (PIME4)	-1.48	-1,931 to -1,030	Yes	****	<0,0001					0:PMFA1 vs. 100:PMFA1	-0.5769	-0,6845 to -0,4693	Yes	****	<0,0001					0:DIX21 (PIME4) vs. 1:DIX21 (PIME4)	-0.9034	-1,317 to -0,4896	Yes	****	<0,0001
	0:PMFA1 vs. 100:PFIG1	-1.193	-1,865 to -0,5202	Yes	****	<0,0001															0:DIX21 (PIME4) vs. 1:DIX22 (PHPF1)	-0.7417	-1,414 to -0,06924	Yes	**	0.0091					0:PMFA1 vs. 100:PFIG1	-0.6822	-0,8428 to -0,5216	Yes	****	<0,0001					0:DIX21 (PIME4) vs. 1:DIX22 (PHPF1)	-1.492	-2,110 to -0,8748	Yes	****	<0,0001
	0:PMFA1 vs. 100:PAGA2	-1.539	-2,211 to -0,8661	Yes	****	<0,0001															0:DIX21 (PIME4) vs. 1:DIX23 (PCSS1)	-0.8907	-1,563 to -0,2182	Yes	***	0.0001					0:PMFA1 vs. 100:PAGA2	-0.6072	-0,7678 to -0,4466	Yes	****	<0,0001					0:DIX21 (PIME4) vs. 1:DIX23 (PCSS1)	-0.7215	-1,339 to -0,1040	Yes	**	0.0027
	0:PMFA1 vs. 100:PFUS1	-1.734	-2,407 to -1,062	Yes	****	<0,0001															0:DIX21 (PIME4) vs. 1:DIX24 (PFUS1)	-2.348	-3,020 to -1,675	Yes	****	<0,0001					0:PMFA1 vs. 100:PFUS1	-0.6923	-0,8529 to -0,5316	Yes	****	<0,0001					0:DIX21 (PIME4) vs. 1:DIX24 (PFUS1)	-2.348	-2,966 to -1,731	Yes	****	<0,0001
	0:PMFA1 vs. 100:PMFA2	-2.861	-3,533 to -2,188	Yes	****	<0,0001															0:DIX21 (PIME4) vs. 1:DIX25 (PFIG1)	-2.272	-2,945 to -1,600	Yes	****	<0,0001					0:PMFA1 vs. 100:PMFA2	-0.5714	-0,7320 to -0,4108	Yes	****	<0,0001					0:DIX21 (PIME4) vs. 1:DIX25 (PFIG1)	-1.817	-2,434 to -1,199	Yes	****	<0,0001
	0:PMFA1 vs. 101:PCSS1	0.006626	-0,6659 to 0,6791	No	ns	>0,9999															0:DIX21 (PIME4) vs. 10:DIX17 (PMFA2)	-1.484	-2,156 to -0,8111	Yes	****	<0,0001					0:PMFA1 vs. 101:PCSS1	-0.5644	-0,7251 to -0,4038	Yes	****	<0,0001					0:DIX21 (PIME4) vs. 10:DIX17 (PMFA2)	-3.609	-4,227 to -2,992	Yes	****	<0,0001
	0:PMFA1 vs. 101:PIME4	-0.2076	-0,8801 to 0,4648	No	ns	>0,9999															0:DIX21 (PIME4) vs. 10:DIX18 (PMFA1)	-1.498	-2,171 to -0,8258	Yes	****	<0,0001					0:PMFA1 vs. 101:PIME4	-0.5969	-0,7575 to -0,4362	Yes	****	<0,0001					0:DIX21 (PIME4) vs. 10:DIX18 (PMFA1)	-2.223	-2,841 to -1,606	Yes	****	<0,0001
	0:PMFA1 vs. 101:PHPF1	-0.6745	-1,347 to -0,001984	Yes	*	0.0478															0:DIX21 (PIME4) vs. 10:DIX19 (PAGA2)	-1.796	-2,468 to -1,123	Yes	****	<0,0001					0:PMFA1 vs. 101:PHPF1	-0.4747	-0,6353 to -0,3141	Yes	****	<0,0001					0:DIX21 (PIME4) vs. 10:DIX19 (PAGA2)	-2.252	-2,869 to -1,634	Yes	****	<0,0001
	0:PMFA1 vs. 101:PYCL076W	-0.8541	-1,527 to -0,1816	Yes	***	0.0003															0:DIX21 (PIME4) vs. 10:DIX20 (PYCL076W)	-2.049	-2,722 to -1,377	Yes	****	<0,0001					0:PMFA1 vs. 101:PYCL076W	-0.5651	-0,7257 to -0,4045	Yes	****	<0,0001					0:DIX21 (PIME4) vs. 10:DIX20 (PYCL076W)	-1.595	-2,213 to -0,9779	Yes	****	<0,0001
	0:PMFA1 vs. 101:PMFA1	-1.42	-1,870 to -0,9692	Yes	****	<0,0001															0:DIX21 (PIME4) vs. 10:DIX21 (PIME4)	-1.42	-1,870 to -0,9692	Yes	****	<0,0001					0:PMFA1 vs. 101:PMFA1	-0.5027	-0,6103 to -0,3950	Yes	****	<0,0001					0:DIX21 (PIME4) vs. 10:DIX21 (PIME4)	-0.9171	-1,331 to -0,5033	Yes	****	<0,0001
	0:PMFA1 vs. 101:PFIG1	-1.132	-1,805 to -0,4597	Yes	****	<0,0001															0:DIX21 (PIME4) vs. 10:DIX22 (PHPF1)	-0.6812	-1,354 to -0,008735	Yes	*	0.0409					0:PMFA1 vs. 101:PFIG1	-0.608	-0,7686 to -0,4473	Yes	****	<0,0001					0:DIX21 (PIME4) vs. 10:DIX22 (PHPF1)	-1.506	-2,124 to -0,8886	Yes	****	<0,0001
	0:PMFA1 vs. 101:PAGA2	-1.478	-2,151 to -0,8056	Yes	****	<0,0001															0:DIX21 (PIME4) vs. 10:DIX23 (PCSS1)	-0.8302	-1,503 to -0,1577	Yes	***	0.0007					0:PMFA1 vs. 101:PAGA2	-0.5329	-0,6936 to -0,3723	Yes	****	<0,0001					0:DIX21 (PIME4) vs. 10:DIX23 (PCSS1)	-0.7353	-1,353 to -0,1178	Yes	**	0.0017
	0:PMFA1 vs. 101:PFUS1	-1.674	-2,346 to -1,001	Yes	****	<0,0001															0:DIX21 (PIME4) vs. 10:DIX24 (PFUS1)	-2.287	-2,960 to -1,615	Yes	****	<0,0001					0:PMFA1 vs. 101:PFUS1	-0.618	-0,7786 to -0,4574	Yes	****	<0,0001					0:DIX21 (PIME4) vs. 10:DIX24 (PFUS1)	-2.362	-2,980 to -1,745	Yes	****	<0,0001
	0:PMFA1 vs. 101:PMFA2	-2.8	-3,473 to -2,128	Yes	****	<0,0001															0:DIX21 (PIME4) vs. 10:DIX25 (PFIG1)	-2.212	-2,884 to -1,539	Yes	****	<0,0001					0:PMFA1 vs. 101:PMFA2	-0.4972	-0,6578 to -0,3365	Yes	****	<0,0001					0:DIX21 (PIME4) vs. 10:DIX25 (PFIG1)	-1.831	-2,448 to -1,213	Yes	****	<0,0001
	0:PMFA1 vs. 102:Neg.Con.	0.6542	-0,1496 to 1,458	No	ns	0.4607															0:DIX21 (PIME4) vs. 100:DIX14 (Neg.Con.)	-0.8008	-1,605 to 0,002963	No	ns	0.0529					0:PMFA1 vs. 102:Neg.Con.	-0.4985	-0,6905 to -0,3065	Yes	****	<0,0001					0:DIX21 (PIME4) vs. 100:DIX14 (Neg.Con.)	-0.1536	-0,8917 to 0,5844	No	ns	>0,9999
	0:PMFA1 vs. 102:PPGK1	-1.673	-2,477 to -0,8693	Yes	****	<0,0001															0:DIX21 (PIME4) vs. 100:DIX27 (PPGK1)	-0.7939	-1,598 to 0,009851	No	ns	0.0601					0:PMFA1 vs. 102:PPGK1	-0.4696	-0,6615 to -0,2776	Yes	****	<0,0001					0:DIX21 (PIME4) vs. 100:DIX27 (PPGK1)	-2.51	-3,248 to -1,772	Yes	****	<0,0001
	0:PMFA1 vs. 102:PTDH3	-2.617	-3,421 to -1,814	Yes	****	<0,0001															0:DIX21 (PIME4) vs. 100:DIX28 (PTDH3)	-0.8188	-1,623 to -0,01499	Yes	*	0.0375					0:PMFA1 vs. 102:PTDH3	-0.4984	-0,6904 to -0,3065	Yes	****	<0,0001					0:DIX21 (PIME4) vs. 100:DIX28 (PTDH3)	-3.425	-4,163 to -2,687	Yes	****	<0,0001
	0:PMFA1 vs. 102:PCSS1	0.07118	-0,5733 to 0,7156	No	ns	>0,9999															0:DIX21 (PIME4) vs. 100:DIX17 (PMFA2)	-1.419	-2,063 to -0,7746	Yes	****	<0,0001					0:PMFA1 vs. 102:PCSS1	-0.5828	-0,7367 to -0,4288	Yes	****	<0,0001					0:DIX21 (PIME4) vs. 100:DIX17 (PMFA2)	-3.526	-4,118 to -2,935	Yes	****	<0,0001
	0:PMFA1 vs. 102:PIME4	-0.1431	-0,7875 to 0,5014	No	ns	>0,9999															0:DIX21 (PIME4) vs. 100:DIX18 (PMFA1)	-1.434	-2,078 to -0,7893	Yes	****	<0,0001					0:PMFA1 vs. 102:PIME4	-0.6152	-0,7691 to -0,4613	Yes	****	<0,0001					0:DIX21 (PIME4) vs. 100:DIX18 (PMFA1)	-2.141	-2,732 to -1,549	Yes	****	<0,0001
	0:PMFA1 vs. 102:PHPF1	-0.6099	-1,254 to 0,03454	No	ns	0.1079															0:DIX21 (PIME4) vs. 100:DIX19 (PAGA2)	-1.731	-2,375 to -1,087	Yes	****	<0,0001					0:PMFA1 vs. 102:PHPF1	-0.493	-0,6470 to -0,3391	Yes	****	<0,0001					0:DIX21 (PIME4) vs. 100:DIX19 (PAGA2)	-2.169	-2,760 to -1,577	Yes	****	<0,0001
	0:PMFA1 vs. 102:PYCL076W	-0.7896	-1,434 to -0,1451	Yes	***	0.0009															0:DIX21 (PIME4) vs. 100:DIX20 (PYCL076W)	-1.984	-2,629 to -1,340	Yes	****	<0,0001					0:PMFA1 vs. 102:PYCL076W	-0.5834	-0,7373 to -0,4295	Yes	****	<0,0001					0:DIX21 (PIME4) vs. 100:DIX20 (PYCL076W)	-1.512	-2,104 to -0,9207	Yes	****	<0,0001
	0:PMFA1 vs. 102:PMFA1	-1.355	-1,763 to -0,9476	Yes	****	<0,0001															0:DIX21 (PIME4) vs. 100:DIX21 (PIME4)	-1.355	-1,763 to -0,9476	Yes	****	<0,0001					0:PMFA1 vs. 102:PMFA1	-0.521	-0,6183 to -0,4236	Yes	****	<0,0001					0:DIX21 (PIME4) vs. 100:DIX21 (PIME4)	-0.8342	-1,208 to -0,4600	Yes	****	<0,0001
	0:PMFA1 vs. 102:PFIG1	-1.068	-1,712 to -0,4232	Yes	****	<0,0001															0:DIX21 (PIME4) vs. 100:DIX22 (PHPF1)	-0.6167	-1,261 to 0,02779	No	ns	0.0935					0:PMFA1 vs. 102:PFIG1	-0.6263	-0,7802 to -0,4724	Yes	****	<0,0001					0:DIX21 (PIME4) vs. 100:DIX22 (PHPF1)	-1.423	-2,015 to -0,8314	Yes	****	<0,0001
	0:PMFA1 vs. 102:PAGA2	-1.414	-2,058 to -0,7691	Yes	****	<0,0001															0:DIX21 (PIME4) vs. 100:DIX23 (PCSS1)	-0.7657	-1,410 to -0,1212	Yes	**	0.0018					0:PMFA1 vs. 102:PAGA2	-0.5513	-0,7052 to -0,3973	Yes	****	<0,0001					0:DIX21 (PIME4) vs. 100:DIX23 (PCSS1)	-0.6524	-1,244 to -0,06060	Yes	**	0.0092
	0:PMFA1 vs. 102:PFUS1	-1.609	-2,254 to -0,9648	Yes	****	<0,0001															0:DIX21 (PIME4) vs. 100:DIX24 (PFUS1)	-2.223	-2,867 to -1,578	Yes	****	<0,0001					0:PMFA1 vs. 102:PFUS1	-0.6363	-0,7903 to -0,4824	Yes	****	<0,0001					0:DIX21 (PIME4) vs. 100:DIX24 (PFUS1)	-2.279	-2,871 to -1,687	Yes	****	<0,0001
	0:PMFA1 vs. 102:PMFA2	-2.736	-3,380 to -2,091	Yes	****	<0,0001															0:DIX21 (PIME4) vs. 100:DIX25 (PFIG1)	-2.147	-2,792 to -1,503	Yes	****	<0,0001					0:PMFA1 vs. 102:PMFA2	-0.5155	-0,6694 to -0,3616	Yes	****	<0,0001					0:DIX21 (PIME4) vs. 100:DIX25 (PFIG1)	-1.748	-2,339 to -1,156	Yes	****	<0,0001
	0:PFIG1 vs. 0:PAGA2	-0.3459	-0,8451 to 0,1533	No	ns	0.8778															0:DIX22 (PHPF1) vs. 0:DIX23 (PCSS1)	-0.149	-0,6482 to 0,3502	No	ns	>0,9999					0:PFIG1 vs. 0:PAGA2	0.07503	-0,04420 to 0,1943	No	ns	0.974					0:DIX22 (PHPF1) vs. 0:DIX23 (PCSS1)	0.7708	0,3125 to 1,229	Yes	****	<0,0001
	0:PFIG1 vs. 0:PFUS1	-0.5416	-1,041 to -0,04239	Yes	*	0.0125															0:DIX22 (PHPF1) vs. 0:DIX24 (PFUS1)	-1.606	-2,105 to -1,107	Yes	****	<0,0001					0:PFIG1 vs. 0:PFUS1	-0.01004	-0,1293 to 0,1092	No	ns	>0,9999					0:DIX22 (PHPF1) vs. 0:DIX24 (PFUS1)	-0.856	-1,314 to -0,3976	Yes	****	<0,0001
	0:PFIG1 vs. 0:PMFA2	-1.668	-2,167 to -1,169	Yes	****	<0,0001															0:DIX22 (PHPF1) vs. 0:DIX25 (PFIG1)	-1.53	-2,030 to -1,031	Yes	****	<0,0001					0:PFIG1 vs. 0:PMFA2	0.1108	-0,008422 to 0,2300	No	ns	0.1352					0:DIX22 (PHPF1) vs. 0:DIX25 (PFIG1)	-0.3245	-0,7828 to 0,1339	No	ns	0.84
	0:PFIG1 vs. 10-4:PCSS1	1.221	0,5488 to 1,894	Yes	****	<0,0001															0:DIX22 (PHPF1) vs. 0.0001:DIX17 (PMFA2)	-0.7199	-1,392 to -0,04745	Yes	*	0.016					0:PFIG1 vs. 10-4:PCSS1	0.06788	-0,09275 to 0,2285	No	ns	>0,9999					0:DIX22 (PHPF1) vs. 0.0001:DIX17 (PMFA2)	-2.045	-2,663 to -1,428	Yes	****	<0,0001
	0:PFIG1 vs. 10-4:PIME4	1.007	0,3345 to 1,679	Yes	****	<0,0001															0:DIX22 (PHPF1) vs. 0.0001:DIX18 (PMFA1)	-0.7346	-1,407 to -0,06216	Yes	*	0.0109					0:PFIG1 vs. 10-4:PIME4	0.03545	-0,1252 to 0,1961	No	ns	>0,9999					0:DIX22 (PHPF1) vs. 0.0001:DIX18 (PMFA1)	-0.6593	-1,277 to -0,04175	Yes	*	0.0168
	0:PFIG1 vs. 10-4:PHPF1	0.5402	-0,1323 to 1,213	No	ns	0.5014															0:DIX22 (PHPF1) vs. 0.0001:DIX19 (PAGA2)	-1.032	-1,704 to -0,3594	Yes	****	<0,0001					0:PFIG1 vs. 10-4:PHPF1	0.1576	-0,003005 to 0,3182	No	ns	0.0661					0:DIX22 (PHPF1) vs. 0.0001:DIX19 (PAGA2)	-0.6873	-1,305 to -0,06981	Yes	**	0.0076
	0:PFIG1 vs. 10-4:PYCL076W	0.3605	-0,3120 to 1,033	No	ns	0.9995															0:DIX22 (PHPF1) vs. 0.0001:DIX20 (PYCL076W)	-1.285	-1,958 to -0,6129	Yes	****	<0,0001					0:PFIG1 vs. 10-4:PYCL076W	0.06724	-0,09339 to 0,2279	No	ns	>0,9999					0:DIX22 (PHPF1) vs. 0.0001:DIX20 (PYCL076W)	-0.03119	-0,6487 to 0,5863	No	ns	>0,9999
	0:PFIG1 vs. 10-4:PMFA1	-0.2051	-0,8776 to 0,4673	No	ns	>0,9999															0:DIX22 (PHPF1) vs. 0.0001:DIX21 (PIME4)	-0.6561	-1,329 to 0,01637	No	ns	0.0717					0:PFIG1 vs. 10-4:PMFA1	0.1297	-0,03096 to 0,2903	No	ns	0.486					0:DIX22 (PHPF1) vs. 0.0001:DIX21 (PIME4)	0.6471	0,02955 to 1,265	Yes	*	0.0234
	0:PFIG1 vs. 10-4:PFIG1	0.08242	-0,3682 to 0,5330	No	ns	>0,9999															0:DIX22 (PHPF1) vs. 0.0001:DIX22 (PHPF1)	0.08242	-0,3682 to 0,5330	No	ns	>0,9999					0:PFIG1 vs. 10-4:PFIG1	0.02435	-0,08328 to 0,1320	No	ns	>0,9999					0:DIX22 (PHPF1) vs. 0.0001:DIX22 (PHPF1)	0.05807	-0,3557 to 0,4718	No	ns	>0,9999
	0:PFIG1 vs. 10-4:PAGA2	-0.2635	-0,9360 to 0,4090	No	ns	>0,9999															0:DIX22 (PHPF1) vs. 0.0001:DIX23 (PCSS1)	-0.06656	-0,7391 to 0,6059	No	ns	>0,9999					0:PFIG1 vs. 10-4:PAGA2	0.09938	-0,06124 to 0,2600	No	ns	0.9813					0:DIX22 (PHPF1) vs. 0.0001:DIX23 (PCSS1)	0.8289	0,2114 to 1,446	Yes	****	<0,0001
	0:PFIG1 vs. 10-4:PFUS1	-0.4592	-1,132 to 0,2133	No	ns	0.9002															0:DIX22 (PHPF1) vs. 0.0001:DIX24 (PFUS1)	-1.524	-2,196 to -0,8511	Yes	****	<0,0001					0:PFIG1 vs. 10-4:PFUS1	0.01432	-0,1463 to 0,1749	No	ns	>0,9999					0:DIX22 (PHPF1) vs. 0.0001:DIX24 (PFUS1)	-0.7979	-1,415 to -0,1804	Yes	***	0.0002
	0:PFIG1 vs. 10-4:PMFA2	-1.586	-2,258 to -0,9130	Yes	****	<0,0001															0:DIX22 (PHPF1) vs. 0.0001:DIX25 (PFIG1)	-1.448	-2,121 to -0,7756	Yes	****	<0,0001					0:PFIG1 vs. 10-4:PMFA2	0.1352	-0,02546 to 0,2958	No	ns	0.3619					0:DIX22 (PHPF1) vs. 0.0001:DIX25 (PFIG1)	-0.2664	-0,8839 to 0,3511	No	ns	>0,9999
	0:PFIG1 vs. 10-3:PCSS1	0.636	-0,03651 to 1,308	No	ns	0.109															0:DIX22 (PHPF1) vs. 0.001:DIX17 (PMFA2)	-1.305	-1,978 to -0,6327	Yes	****	<0,0001					0:PFIG1 vs. 10-3:PCSS1	-0.05895	-0,2196 to 0,1017	No	ns	>0,9999					0:DIX22 (PHPF1) vs. 0.001:DIX17 (PMFA2)	-2.504	-3,121 to -1,886	Yes	****	<0,0001
	0:PFIG1 vs. 10-3:PIME4	0.4217	-0,2508 to 1,094	No	ns	0.9757															0:DIX22 (PHPF1) vs. 0.001:DIX18 (PMFA1)	-1.32	-1,992 to -0,6474	Yes	****	<0,0001					0:PFIG1 vs. 10-3:PIME4	-0.09138	-0,2520 to 0,06925	No	ns	0.9972					0:DIX22 (PHPF1) vs. 0.001:DIX18 (PMFA1)	-1.118	-1,735 to -0,5002	Yes	****	<0,0001
	0:PFIG1 vs. 10-3:PHPF1	-0.04512	-0,7176 to 0,6274	No	ns	>0,9999															0:DIX22 (PHPF1) vs. 0.001:DIX19 (PAGA2)	-1.617	-2,290 to -0,9447	Yes	****	<0,0001					0:PFIG1 vs. 10-3:PHPF1	0.03079	-0,1298 to 0,1914	No	ns	>0,9999					0:DIX22 (PHPF1) vs. 0.001:DIX19 (PAGA2)	-1.146	-1,763 to -0,5283	Yes	****	<0,0001
	0:PFIG1 vs. 10-3:PYCL076W	-0.2248	-0,8973 to 0,4477	No	ns	>0,9999															0:DIX22 (PHPF1) vs. 0.001:DIX20 (PYCL076W)	-1.871	-2,543 to -1,198	Yes	****	<0,0001					0:PFIG1 vs. 10-3:PYCL076W	-0.05959	-0,2202 to 0,1010	No	ns	>0,9999					0:DIX22 (PHPF1) vs. 0.001:DIX20 (PYCL076W)	-0.4896	-1,107 to 0,1279	No	ns	0.5411
	0:PFIG1 vs. 10-3:PMFA1	-0.7904	-1,463 to -0,1179	Yes	**	0.0024															0:DIX22 (PHPF1) vs. 0.001:DIX21 (PIME4)	-1.241	-1,914 to -0,5689	Yes	****	<0,0001					0:PFIG1 vs. 10-3:PMFA1	0.002836	-0,1578 to 0,1635	No	ns	>0,9999					0:DIX22 (PHPF1) vs. 0.001:DIX21 (PIME4)	0.1886	-0,4289 to 0,8061	No	ns	>0,9999
	0:PFIG1 vs. 10-3:PFIG1	-0.5029	-0,9535 to -0,05224	Yes	**	0.0072															0:DIX22 (PHPF1) vs. 0.001:DIX22 (PHPF1)	-0.5029	-0,9535 to -0,05224	Yes	**	0.0072					0:PFIG1 vs. 10-3:PFIG1	-0.1025	-0,2101 to 0,005151	No	ns	0.0998					0:DIX22 (PHPF1) vs. 0.001:DIX22 (PHPF1)	-0.4004	-0,8142 to 0,01340	No	ns	0.0805
	0:PFIG1 vs. 10-3:PAGA2	-0.8488	-1,521 to -0,1763	Yes	***	0.0004															0:DIX22 (PHPF1) vs. 0.001:DIX23 (PCSS1)	-0.6518	-1,324 to 0,02065	No	ns	0.0786					0:PFIG1 vs. 10-3:PAGA2	-0.02745	-0,1881 to 0,1332	No	ns	>0,9999					0:DIX22 (PHPF1) vs. 0.001:DIX23 (PCSS1)	0.3705	-0,2471 to 0,9880	No	ns	0.9902
	0:PFIG1 vs. 10-3:PFUS1	-1.044	-1,717 to -0,3719	Yes	****	<0,0001															0:DIX22 (PHPF1) vs. 0.001:DIX24 (PFUS1)	-2.109	-2,781 to -1,436	Yes	****	<0,0001					0:PFIG1 vs. 10-3:PFUS1	-0.1125	-0,2731 to 0,04811	No	ns	0.8595					0:DIX22 (PHPF1) vs. 0.001:DIX24 (PFUS1)	-1.256	-1,874 to -0,6389	Yes	****	<0,0001
	0:PFIG1 vs. 10-3:PMFA2	-2.171	-2,843 to -1,498	Yes	****	<0,0001															0:DIX22 (PHPF1) vs. 0.001:DIX25 (PFIG1)	-2.033	-2,706 to -1,361	Yes	****	<0,0001					0:PFIG1 vs. 10-3:PMFA2	0.008334	-0,1523 to 0,1690	No	ns	>0,9999					0:DIX22 (PHPF1) vs. 0.001:DIX25 (PFIG1)	-0.7248	-1,342 to -0,1073	Yes	**	0.0024
	0:PFIG1 vs. 10-2:PCSS1	-0.05176	-0,7243 to 0,6207	No	ns	>0,9999															0:DIX22 (PHPF1) vs. 0.01:DIX17 (PMFA2)	-1.993	-2,665 to -1,320	Yes	****	<0,0001					0:PFIG1 vs. 10-2:PCSS1	-0.366	-0,5266 to -0,2054	Yes	****	<0,0001					0:DIX22 (PHPF1) vs. 0.01:DIX17 (PMFA2)	-2.884	-3,502 to -2,267	Yes	****	<0,0001
	0:PFIG1 vs. 10-2:PIME4	-0.266	-0,9385 to 0,4065	No	ns	>0,9999															0:DIX22 (PHPF1) vs. 0.01:DIX18 (PMFA1)	-2.008	-2,680 to -1,335	Yes	****	<0,0001					0:PFIG1 vs. 10-2:PIME4	-0.3984	-0,5590 to -0,2378	Yes	****	<0,0001					0:DIX22 (PHPF1) vs. 0.01:DIX18 (PMFA1)	-1.498	-2,116 to -0,8809	Yes	****	<0,0001
	0:PFIG1 vs. 10-2:PHPF1	-0.7329	-1,405 to -0,06037	Yes	*	0.0115															0:DIX22 (PHPF1) vs. 0.01:DIX19 (PAGA2)	-2.305	-2,977 to -1,632	Yes	****	<0,0001					0:PFIG1 vs. 10-2:PHPF1	-0.2762	-0,4369 to -0,1156	Yes	****	<0,0001					0:DIX22 (PHPF1) vs. 0.01:DIX19 (PAGA2)	-1.526	-2,144 to -0,9090	Yes	****	<0,0001
	0:PFIG1 vs. 10-2:PYCL076W	-0.9125	-1,585 to -0,2400	Yes	****	<0,0001															0:DIX22 (PHPF1) vs. 0.01:DIX20 (PYCL076W)	-2.558	-3,231 to -1,886	Yes	****	<0,0001					0:PFIG1 vs. 10-2:PYCL076W	-0.3666	-0,5273 to -0,2060	Yes	****	<0,0001					0:DIX22 (PHPF1) vs. 0.01:DIX20 (PYCL076W)	-0.8703	-1,488 to -0,2528	Yes	****	<0,0001
	0:PFIG1 vs. 10-2:PMFA1	-1.478	-2,151 to -0,8057	Yes	****	<0,0001															0:DIX22 (PHPF1) vs. 0.01:DIX21 (PIME4)	-1.929	-2,602 to -1,257	Yes	****	<0,0001					0:PFIG1 vs. 10-2:PMFA1	-0.3042	-0,4648 to -0,1436	Yes	****	<0,0001					0:DIX22 (PHPF1) vs. 0.01:DIX21 (PIME4)	-0.1921	-0,8096 to 0,4254	No	ns	>0,9999
	0:PFIG1 vs. 10-2:PFIG1	-1.191	-1,641 to -0,7400	Yes	****	<0,0001															0:DIX22 (PHPF1) vs. 0.01:DIX22 (PHPF1)	-1.191	-1,641 to -0,7400	Yes	****	<0,0001					0:PFIG1 vs. 10-2:PFIG1	-0.4095	-0,5171 to -0,3019	Yes	****	<0,0001					0:DIX22 (PHPF1) vs. 0.01:DIX22 (PHPF1)	-0.7811	-1,195 to -0,3673	Yes	****	<0,0001
	0:PFIG1 vs. 10-2:PAGA2	-1.537	-2,209 to -0,8640	Yes	****	<0,0001															0:DIX22 (PHPF1) vs. 0.01:DIX23 (PCSS1)	-1.34	-2,012 to -0,6671	Yes	****	<0,0001					0:PFIG1 vs. 10-2:PAGA2	-0.3345	-0,4951 to -0,1739	Yes	****	<0,0001					0:DIX22 (PHPF1) vs. 0.01:DIX23 (PCSS1)	-0.01024	-0,6278 to 0,6073	No	ns	>0,9999
	0:PFIG1 vs. 10-2:PFUS1	-1.732	-2,405 to -1,060	Yes	****	<0,0001															0:DIX22 (PHPF1) vs. 0.01:DIX24 (PFUS1)	-2.797	-3,469 to -2,124	Yes	****	<0,0001					0:PFIG1 vs. 10-2:PFUS1	-0.4195	-0,5802 to -0,2589	Yes	****	<0,0001					0:DIX22 (PHPF1) vs. 0.01:DIX24 (PFUS1)	-1.637	-2,255 to -1,020	Yes	****	<0,0001
	0:PFIG1 vs. 10-2:PMFA2	-2.859	-3,531 to -2,186	Yes	****	<0,0001															0:DIX22 (PHPF1) vs. 0.01:DIX25 (PFIG1)	-2.721	-3,394 to -2,049	Yes	****	<0,0001					0:PFIG1 vs. 10-2:PMFA2	-0.2987	-0,4593 to -0,1381	Yes	****	<0,0001					0:DIX22 (PHPF1) vs. 0.01:DIX25 (PFIG1)	-1.106	-1,723 to -0,4880	Yes	****	<0,0001
	0:PFIG1 vs. 10-1:Neg.Con.	0.4046	-0,3992 to 1,208	No	ns	>0,9999															0:DIX22 (PHPF1) vs. 0.1:DIX14 (Neg.Con.)	-1.501	-2,305 to -0,6977	Yes	****	<0,0001					0:PFIG1 vs. 10-1:Neg.Con.	-0.4062	-0,5982 to -0,2143	Yes	****	<0,0001					0:DIX22 (PHPF1) vs. 0.1:DIX14 (Neg.Con.)	0.4863	-0,2517 to 1,224	No	ns	0.9417
	0:PFIG1 vs. 10-1:PPGK1	-1.923	-2,726 to -1,119	Yes	****	<0,0001															0:DIX22 (PHPF1) vs. 0.1:DIX27 (PPGK1)	-1.495	-2,298 to -0,6908	Yes	****	<0,0001					0:PFIG1 vs. 10-1:PPGK1	-0.3773	-0,5693 to -0,1853	Yes	****	<0,0001					0:DIX22 (PHPF1) vs. 0.1:DIX27 (PPGK1)	-1.87	-2,608 to -1,132	Yes	****	<0,0001
	0:PFIG1 vs. 10-1:PTDH3	-2.867	-3,671 to -2,063	Yes	****	<0,0001															0:DIX22 (PHPF1) vs. 0.1:DIX28 (PTDH3)	-1.519	-2,323 to -0,7156	Yes	****	<0,0001					0:PFIG1 vs. 10-1:PTDH3	-0.4062	-0,5982 to -0,2142	Yes	****	<0,0001					0:DIX22 (PHPF1) vs. 0.1:DIX28 (PTDH3)	-2.785	-3,523 to -2,047	Yes	****	<0,0001
	0:PFIG1 vs. 10-1:PCSS1	-0.1785	-0,8229 to 0,4660	No	ns	>0,9999															0:DIX22 (PHPF1) vs. 0.1:DIX17 (PMFA2)	-2.12	-2,764 to -1,475	Yes	****	<0,0001					0:PFIG1 vs. 10-1:PCSS1	-0.4905	-0,6445 to -0,3366	Yes	****	<0,0001					0:DIX22 (PHPF1) vs. 0.1:DIX17 (PMFA2)	-2.886	-3,478 to -2,295	Yes	****	<0,0001
	0:PFIG1 vs. 10-1:PIME4	-0.3927	-1,037 to 0,2517	No	ns	0.9863															0:DIX22 (PHPF1) vs. 0.1:DIX18 (PMFA1)	-2.134	-2,779 to -1,490	Yes	****	<0,0001					0:PFIG1 vs. 10-1:PIME4	-0.523	-0,6769 to -0,3690	Yes	****	<0,0001					0:DIX22 (PHPF1) vs. 0.1:DIX18 (PMFA1)	-1.501	-2,092 to -0,9088	Yes	****	<0,0001
	0:PFIG1 vs. 10-1:PHPF1	-0.8596	-1,504 to -0,2151	Yes	****	<0,0001															0:DIX22 (PHPF1) vs. 0.1:DIX19 (PAGA2)	-2.432	-3,076 to -1,787	Yes	****	<0,0001					0:PFIG1 vs. 10-1:PHPF1	-0.4008	-0,5547 to -0,2469	Yes	****	<0,0001					0:DIX22 (PHPF1) vs. 0.1:DIX19 (PAGA2)	-1.529	-2,120 to -0,9369	Yes	****	<0,0001
	0:PFIG1 vs. 10-1:PYCL076W	-1.039	-1,684 to -0,3947	Yes	****	<0,0001															0:DIX22 (PHPF1) vs. 0.1:DIX20 (PYCL076W)	-2.685	-3,330 to -2,041	Yes	****	<0,0001					0:PFIG1 vs. 10-1:PYCL076W	-0.4912	-0,6451 to -0,3372	Yes	****	<0,0001					0:DIX22 (PHPF1) vs. 0.1:DIX20 (PYCL076W)	-0.8725	-1,464 to -0,2807	Yes	****	<0,0001
	0:PFIG1 vs. 10-1:PMFA1	-1.605	-2,249 to -0,9604	Yes	****	<0,0001															0:DIX22 (PHPF1) vs. 0.1:DIX21 (PIME4)	-2.056	-2,700 to -1,411	Yes	****	<0,0001					0:PFIG1 vs. 10-1:PMFA1	-0.4287	-0,5827 to -0,2748	Yes	****	<0,0001					0:DIX22 (PHPF1) vs. 0.1:DIX21 (PIME4)	-0.1942	-0,7860 to 0,3975	No	ns	>0,9999
	0:PFIG1 vs. 10-1:PFIG1	-1.317	-1,725 to -0,9097	Yes	****	<0,0001															0:DIX22 (PHPF1) vs. 0.1:DIX22 (PHPF1)	-1.317	-1,725 to -0,9097	Yes	****	<0,0001					0:PFIG1 vs. 10-1:PFIG1	-0.5341	-0,6314 to -0,4367	Yes	****	<0,0001					0:DIX22 (PHPF1) vs. 0.1:DIX22 (PHPF1)	-0.7832	-1,158 to -0,4090	Yes	****	<0,0001
	0:PFIG1 vs. 10-1:PAGA2	-1.663	-2,308 to -1,019	Yes	****	<0,0001															0:DIX22 (PHPF1) vs. 0.1:DIX23 (PCSS1)	-1.466	-2,111 to -0,8218	Yes	****	<0,0001					0:PFIG1 vs. 10-1:PAGA2	-0.459	-0,6130 to -0,3051	Yes	****	<0,0001					0:DIX22 (PHPF1) vs. 0.1:DIX23 (PCSS1)	-0.0124	-0,6042 to 0,5794	No	ns	>0,9999
	0:PFIG1 vs. 10-1:PFUS1	-1.859	-2,503 to -1,214	Yes	****	<0,0001															0:DIX22 (PHPF1) vs. 0.1:DIX24 (PFUS1)	-2.923	-3,568 to -2,279	Yes	****	<0,0001					0:PFIG1 vs. 10-1:PFUS1	-0.5441	-0,6980 to -0,3902	Yes	****	<0,0001					0:DIX22 (PHPF1) vs. 0.1:DIX24 (PFUS1)	-1.639	-2,231 to -1,047	Yes	****	<0,0001
	0:PFIG1 vs. 10-1:PMFA2	-2.985	-3,630 to -2,341	Yes	****	<0,0001															0:DIX22 (PHPF1) vs. 0.1:DIX25 (PFIG1)	-2.848	-3,492 to -2,203	Yes	****	<0,0001					0:PFIG1 vs. 10-1:PMFA2	-0.4232	-0,5772 to -0,2693	Yes	****	<0,0001					0:DIX22 (PHPF1) vs. 0.1:DIX25 (PFIG1)	-1.108	-1,699 to -0,5159	Yes	****	<0,0001
	0:PFIG1 vs. 100:PCSS1	-0.3414	-1,014 to 0,3310	No	ns	0.9999															0:DIX22 (PHPF1) vs. 1:DIX17 (PMFA2)	-2.283	-2,955 to -1,610	Yes	****	<0,0001					0:PFIG1 vs. 100:PCSS1	-0.5334	-0,6940 to -0,3728	Yes	****	<0,0001					0:DIX22 (PHPF1) vs. 1:DIX17 (PMFA2)	-3.007	-3,624 to -2,389	Yes	****	<0,0001
	0:PFIG1 vs. 100:PIME4	-0.5557	-1,228 to 0,1168	No	ns	0.4149															0:DIX22 (PHPF1) vs. 1:DIX18 (PMFA1)	-2.297	-2,970 to -1,625	Yes	****	<0,0001					0:PFIG1 vs. 100:PIME4	-0.5658	-0,7264 to -0,4052	Yes	****	<0,0001					0:DIX22 (PHPF1) vs. 1:DIX18 (PMFA1)	-1.621	-2,238 to -1,003	Yes	****	<0,0001
	0:PFIG1 vs. 100:PHPF1	-1.023	-1,695 to -0,3501	Yes	****	<0,0001															0:DIX22 (PHPF1) vs. 1:DIX19 (PAGA2)	-2.595	-3,267 to -1,922	Yes	****	<0,0001					0:PFIG1 vs. 100:PHPF1	-0.4436	-0,6043 to -0,2830	Yes	****	<0,0001					0:DIX22 (PHPF1) vs. 1:DIX19 (PAGA2)	-1.649	-2,266 to -1,031	Yes	****	<0,0001
	0:PFIG1 vs. 100:PYCL076W	-1.202	-1,875 to -0,5297	Yes	****	<0,0001															0:DIX22 (PHPF1) vs. 1:DIX20 (PYCL076W)	-2.848	-3,521 to -2,176	Yes	****	<0,0001					0:PFIG1 vs. 100:PYCL076W	-0.534	-0,6947 to -0,3734	Yes	****	<0,0001					0:DIX22 (PHPF1) vs. 1:DIX20 (PYCL076W)	-0.9926	-1,610 to -0,3751	Yes	****	<0,0001
	0:PFIG1 vs. 100:PMFA1	-1.768	-2,440 to -1,095	Yes	****	<0,0001															0:DIX22 (PHPF1) vs. 1:DIX21 (PIME4)	-2.219	-2,891 to -1,546	Yes	****	<0,0001					0:PFIG1 vs. 100:PMFA1	-0.4716	-0,6322 to -0,3110	Yes	****	<0,0001					0:DIX22 (PHPF1) vs. 1:DIX21 (PIME4)	-0.3144	-0,9319 to 0,3032	No	ns	0.9999
	0:PFIG1 vs. 100:PFIG1	-1.48	-1,931 to -1,030	Yes	****	<0,0001															0:DIX22 (PHPF1) vs. 1:DIX22 (PHPF1)	-1.48	-1,931 to -1,030	Yes	****	<0,0001					0:PFIG1 vs. 100:PFIG1	-0.5769	-0,6845 to -0,4693	Yes	****	<0,0001					0:DIX22 (PHPF1) vs. 1:DIX22 (PHPF1)	-0.9034	-1,317 to -0,4896	Yes	****	<0,0001
	0:PFIG1 vs. 100:PAGA2	-1.826	-2,499 to -1,154	Yes	****	<0,0001															0:DIX22 (PHPF1) vs. 1:DIX23 (PCSS1)	-1.629	-2,302 to -0,9568	Yes	****	<0,0001					0:PFIG1 vs. 100:PAGA2	-0.5019	-0,6625 to -0,3413	Yes	****	<0,0001					0:DIX22 (PHPF1) vs. 1:DIX23 (PCSS1)	-0.1325	-0,7500 to 0,4850	No	ns	>0,9999
	0:PFIG1 vs. 100:PFUS1	-2.022	-2,694 to -1,349	Yes	****	<0,0001															0:DIX22 (PHPF1) vs. 1:DIX24 (PFUS1)	-3.086	-3,759 to -2,414	Yes	****	<0,0001					0:PFIG1 vs. 100:PFUS1	-0.5869	-0,7476 to -0,4263	Yes	****	<0,0001					0:DIX22 (PHPF1) vs. 1:DIX24 (PFUS1)	-1.759	-2,377 to -1,142	Yes	****	<0,0001
	0:PFIG1 vs. 100:PMFA2	-3.148	-3,821 to -2,476	Yes	****	<0,0001															0:DIX22 (PHPF1) vs. 1:DIX25 (PFIG1)	-3.011	-3,683 to -2,338	Yes	****	<0,0001					0:PFIG1 vs. 100:PMFA2	-0.4661	-0,6267 to -0,3055	Yes	****	<0,0001					0:DIX22 (PHPF1) vs. 1:DIX25 (PFIG1)	-1.228	-1,845 to -0,6103	Yes	****	<0,0001
	0:PFIG1 vs. 101:PCSS1	-0.2809	-0,9534 to 0,3915	No	ns	>0,9999															0:DIX22 (PHPF1) vs. 10:DIX17 (PMFA2)	-2.222	-2,895 to -1,550	Yes	****	<0,0001					0:PFIG1 vs. 101:PCSS1	-0.4591	-0,6197 to -0,2985	Yes	****	<0,0001					0:DIX22 (PHPF1) vs. 10:DIX17 (PMFA2)	-3.02	-3,638 to -2,403	Yes	****	<0,0001
	0:PFIG1 vs. 101:PIME4	-0.4952	-1,168 to 0,1773	No	ns	0.7521															0:DIX22 (PHPF1) vs. 10:DIX18 (PMFA1)	-2.237	-2,909 to -1,564	Yes	****	<0,0001					0:PFIG1 vs. 101:PIME4	-0.4916	-0,6522 to -0,3309	Yes	****	<0,0001					0:DIX22 (PHPF1) vs. 10:DIX18 (PMFA1)	-1.634	-2,252 to -1,017	Yes	****	<0,0001
	0:PFIG1 vs. 101:PHPF1	-0.962	-1,635 to -0,2896	Yes	****	<0,0001															0:DIX22 (PHPF1) vs. 10:DIX19 (PAGA2)	-2.534	-3,207 to -1,862	Yes	****	<0,0001					0:PFIG1 vs. 101:PHPF1	-0.3694	-0,5300 to -0,2088	Yes	****	<0,0001					0:DIX22 (PHPF1) vs. 10:DIX19 (PAGA2)	-1.663	-2,280 to -1,045	Yes	****	<0,0001
	0:PFIG1 vs. 101:PYCL076W	-1.142	-1,814 to -0,4692	Yes	****	<0,0001															0:DIX22 (PHPF1) vs. 10:DIX20 (PYCL076W)	-2.788	-3,460 to -2,115	Yes	****	<0,0001					0:PFIG1 vs. 101:PYCL076W	-0.4598	-0,6204 to -0,2991	Yes	****	<0,0001					0:DIX22 (PHPF1) vs. 10:DIX20 (PYCL076W)	-1.006	-1,624 to -0,3889	Yes	****	<0,0001
	0:PFIG1 vs. 101:PMFA1	-1.707	-2,380 to -1,035	Yes	****	<0,0001															0:DIX22 (PHPF1) vs. 10:DIX21 (PIME4)	-2.158	-2,831 to -1,486	Yes	****	<0,0001					0:PFIG1 vs. 101:PMFA1	-0.3973	-0,5580 to -0,2367	Yes	****	<0,0001					0:DIX22 (PHPF1) vs. 10:DIX21 (PIME4)	-0.3281	-0,9456 to 0,2894	No	ns	0.9996
	0:PFIG1 vs. 101:PFIG1	-1.42	-1,870 to -0,9692	Yes	****	<0,0001															0:DIX22 (PHPF1) vs. 10:DIX22 (PHPF1)	-1.42	-1,870 to -0,9692	Yes	****	<0,0001					0:PFIG1 vs. 101:PFIG1	-0.5027	-0,6103 to -0,3950	Yes	****	<0,0001					0:DIX22 (PHPF1) vs. 10:DIX22 (PHPF1)	-0.9171	-1,331 to -0,5033	Yes	****	<0,0001
	0:PFIG1 vs. 101:PAGA2	-1.766	-2,438 to -1,093	Yes	****	<0,0001															0:DIX22 (PHPF1) vs. 10:DIX23 (PCSS1)	-1.569	-2,241 to -0,8963	Yes	****	<0,0001					0:PFIG1 vs. 101:PAGA2	-0.4276	-0,5882 to -0,2670	Yes	****	<0,0001					0:DIX22 (PHPF1) vs. 10:DIX23 (PCSS1)	-0.1463	-0,7638 to 0,4712	No	ns	>0,9999
	0:PFIG1 vs. 101:PFUS1	-1.961	-2,634 to -1,289	Yes	****	<0,0001															0:DIX22 (PHPF1) vs. 10:DIX24 (PFUS1)	-3.026	-3,698 to -2,353	Yes	****	<0,0001					0:PFIG1 vs. 101:PFUS1	-0.5127	-0,6733 to -0,3521	Yes	****	<0,0001					0:DIX22 (PHPF1) vs. 10:DIX24 (PFUS1)	-1.773	-2,391 to -1,156	Yes	****	<0,0001
	0:PFIG1 vs. 101:PMFA2	-3.088	-3,760 to -2,415	Yes	****	<0,0001															0:DIX22 (PHPF1) vs. 10:DIX25 (PFIG1)	-2.95	-3,623 to -2,278	Yes	****	<0,0001					0:PFIG1 vs. 101:PMFA2	-0.3918	-0,5525 to -0,2312	Yes	****	<0,0001					0:DIX22 (PHPF1) vs. 10:DIX25 (PFIG1)	-1.242	-1,859 to -0,6241	Yes	****	<0,0001
	0:PFIG1 vs. 102:Neg.Con.	0.3666	-0,4371 to 1,170	No	ns	>0,9999															0:DIX22 (PHPF1) vs. 100:DIX14 (Neg.Con.)	-1.539	-2,343 to -0,7356	Yes	****	<0,0001					0:PFIG1 vs. 102:Neg.Con.	-0.3932	-0,5852 to -0,2012	Yes	****	<0,0001					0:DIX22 (PHPF1) vs. 100:DIX14 (Neg.Con.)	0.4354	-0,3027 to 1,173	No	ns	0.9933
	0:PFIG1 vs. 102:PPGK1	-1.961	-2,764 to -1,157	Yes	****	<0,0001															0:DIX22 (PHPF1) vs. 100:DIX27 (PPGK1)	-1.532	-2,336 to -0,7287	Yes	****	<0,0001					0:PFIG1 vs. 102:PPGK1	-0.3642	-0,5562 to -0,1723	Yes	****	<0,0001					0:DIX22 (PHPF1) vs. 100:DIX27 (PPGK1)	-1.921	-2,659 to -1,183	Yes	****	<0,0001
	0:PFIG1 vs. 102:PTDH3	-2.905	-3,709 to -2,101	Yes	****	<0,0001															0:DIX22 (PHPF1) vs. 100:DIX28 (PTDH3)	-1.557	-2,361 to -0,7535	Yes	****	<0,0001					0:PFIG1 vs. 102:PTDH3	-0.3931	-0,5851 to -0,2011	Yes	****	<0,0001					0:DIX22 (PHPF1) vs. 100:DIX28 (PTDH3)	-2.836	-3,574 to -2,098	Yes	****	<0,0001
	0:PFIG1 vs. 102:PCSS1	-0.2164	-0,8608 to 0,4281	No	ns	>0,9999															0:DIX22 (PHPF1) vs. 100:DIX17 (PMFA2)	-2.158	-2,802 to -1,513	Yes	****	<0,0001					0:PFIG1 vs. 102:PCSS1	-0.4775	-0,6314 to -0,3235	Yes	****	<0,0001					0:DIX22 (PHPF1) vs. 100:DIX17 (PMFA2)	-2.937	-3,529 to -2,346	Yes	****	<0,0001
	0:PFIG1 vs. 102:PIME4	-0.4307	-1,075 to 0,2138	No	ns	0.9272															0:DIX22 (PHPF1) vs. 100:DIX18 (PMFA1)	-2.172	-2,817 to -1,528	Yes	****	<0,0001					0:PFIG1 vs. 102:PIME4	-0.5099	-0,6638 to -0,3560	Yes	****	<0,0001					0:DIX22 (PHPF1) vs. 100:DIX18 (PMFA1)	-1.552	-2,143 to -0,9598	Yes	****	<0,0001
	0:PFIG1 vs. 102:PHPF1	-0.8975	-1,542 to -0,2530	Yes	****	<0,0001															0:DIX22 (PHPF1) vs. 100:DIX19 (PAGA2)	-2.47	-3,114 to -1,825	Yes	****	<0,0001					0:PFIG1 vs. 102:PHPF1	-0.3877	-0,5417 to -0,2338	Yes	****	<0,0001					0:DIX22 (PHPF1) vs. 100:DIX19 (PAGA2)	-1.58	-2,171 to -0,9879	Yes	****	<0,0001
	0:PFIG1 vs. 102:PYCL076W	-1.077	-1,722 to -0,4327	Yes	****	<0,0001															0:DIX22 (PHPF1) vs. 100:DIX20 (PYCL076W)	-2.723	-3,367 to -2,079	Yes	****	<0,0001					0:PFIG1 vs. 102:PYCL076W	-0.4781	-0,6320 to -0,3242	Yes	****	<0,0001					0:DIX22 (PHPF1) vs. 100:DIX20 (PYCL076W)	-0.9235	-1,515 to -0,3317	Yes	****	<0,0001
	0:PFIG1 vs. 102:PMFA1	-1.643	-2,287 to -0,9983	Yes	****	<0,0001															0:DIX22 (PHPF1) vs. 100:DIX21 (PIME4)	-2.094	-2,738 to -1,449	Yes	****	<0,0001					0:PFIG1 vs. 102:PMFA1	-0.4157	-0,5696 to -0,2617	Yes	****	<0,0001					0:DIX22 (PHPF1) vs. 100:DIX21 (PIME4)	-0.2452	-0,8370 to 0,3465	No	ns	>0,9999
	0:PFIG1 vs. 102:PFIG1	-1.355	-1,763 to -0,9476	Yes	****	<0,0001															0:DIX22 (PHPF1) vs. 100:DIX22 (PHPF1)	-1.355	-1,763 to -0,9476	Yes	****	<0,0001					0:PFIG1 vs. 102:PFIG1	-0.521	-0,6183 to -0,4236	Yes	****	<0,0001					0:DIX22 (PHPF1) vs. 100:DIX22 (PHPF1)	-0.8342	-1,208 to -0,4600	Yes	****	<0,0001
	0:PFIG1 vs. 102:PAGA2	-1.701	-2,346 to -1,057	Yes	****	<0,0001															0:DIX22 (PHPF1) vs. 100:DIX23 (PCSS1)	-1.504	-2,149 to -0,8597	Yes	****	<0,0001					0:PFIG1 vs. 102:PAGA2	-0.446	-0,5999 to -0,2920	Yes	****	<0,0001					0:DIX22 (PHPF1) vs. 100:DIX23 (PCSS1)	-0.06339	-0,6552 to 0,5284	No	ns	>0,9999
	0:PFIG1 vs. 102:PFUS1	-1.897	-2,541 to -1,252	Yes	****	<0,0001															0:DIX22 (PHPF1) vs. 100:DIX24 (PFUS1)	-2.961	-3,606 to -2,317	Yes	****	<0,0001					0:PFIG1 vs. 102:PFUS1	-0.531	-0,6850 to -0,3771	Yes	****	<0,0001					0:DIX22 (PHPF1) vs. 100:DIX24 (PFUS1)	-1.69	-2,282 to -1,098	Yes	****	<0,0001
	0:PFIG1 vs. 102:PMFA2	-3.023	-3,668 to -2,379	Yes	****	<0,0001															0:DIX22 (PHPF1) vs. 100:DIX25 (PFIG1)	-2.886	-3,530 to -2,241	Yes	****	<0,0001					0:PFIG1 vs. 102:PMFA2	-0.4102	-0,5641 to -0,2562	Yes	****	<0,0001					0:DIX22 (PHPF1) vs. 100:DIX25 (PFIG1)	-1.159	-1,750 to -0,5669	Yes	****	<0,0001
	0:PAGA2 vs. 0:PFUS1	-0.1957	-0,6949 to 0,3035	No	ns	>0,9999															0:DIX23 (PCSS1) vs. 0:DIX24 (PFUS1)	-1.457	-1,956 to -0,9578	Yes	****	<0,0001					0:PAGA2 vs. 0:PFUS1	-0.08506	-0,2043 to 0,03417	No	ns	0.8243					0:DIX23 (PCSS1) vs. 0:DIX24 (PFUS1)	-1.627	-2,085 to -1,168	Yes	****	<0,0001
	0:PAGA2 vs. 0:PMFA2	-1.322	-1,821 to -0,8228	Yes	****	<0,0001															0:DIX23 (PCSS1) vs. 0:DIX25 (PFIG1)	-1.381	-1,881 to -0,8823	Yes	****	<0,0001					0:PAGA2 vs. 0:PMFA2	0.03578	-0,08345 to 0,1550	No	ns	>0,9999					0:DIX23 (PCSS1) vs. 0:DIX25 (PFIG1)	-1.095	-1,554 to -0,6369	Yes	****	<0,0001
	0:PAGA2 vs. 10-4:PCSS1	1.567	0,8947 to 2,240	Yes	****	<0,0001															0:DIX23 (PCSS1) vs. 0.0001:DIX17 (PMFA2)	-0.571	-1,243 to 0,1015	No	ns	0.3367					0:PAGA2 vs. 10-4:PCSS1	-0.007151	-0,1678 to 0,1535	No	ns	>0,9999					0:DIX23 (PCSS1) vs. 0.0001:DIX17 (PMFA2)	-2.816	-3,434 to -2,198	Yes	****	<0,0001
	0:PAGA2 vs. 10-4:PIME4	1.353	0,6804 to 2,025	Yes	****	<0,0001															0:DIX23 (PCSS1) vs. 0.0001:DIX18 (PMFA1)	-0.5857	-1,258 to 0,08683	No	ns	0.2695					0:PAGA2 vs. 10-4:PIME4	-0.03958	-0,2002 to 0,1210	No	ns	>0,9999					0:DIX23 (PCSS1) vs. 0.0001:DIX18 (PMFA1)	-1.43	-2,048 to -0,8126	Yes	****	<0,0001
	0:PAGA2 vs. 10-4:PHPF1	0.8861	0,2136 to 1,559	Yes	***	0.0001															0:DIX23 (PCSS1) vs. 0.0001:DIX19 (PAGA2)	-0.8829	-1,555 to -0,2104	Yes	***	0.0001					0:PAGA2 vs. 10-4:PHPF1	0.08259	-0,07803 to 0,2432	No	ns	0.9998					0:DIX23 (PCSS1) vs. 0.0001:DIX19 (PAGA2)	-1.458	-2,076 to -0,8407	Yes	****	<0,0001
	0:PAGA2 vs. 10-4:PYCL076W	0.7064	0,03394 to 1,379	Yes	*	0.0224															0:DIX23 (PCSS1) vs. 0.0001:DIX20 (PYCL076W)	-1.136	-1,809 to -0,4639	Yes	****	<0,0001					0:PAGA2 vs. 10-4:PYCL076W	-0.007794	-0,1684 to 0,1528	No	ns	>0,9999					0:DIX23 (PCSS1) vs. 0.0001:DIX20 (PYCL076W)	-0.802	-1,420 to -0,1845	Yes	***	0.0002
	0:PAGA2 vs. 10-4:PMFA1	0.1408	-0,5317 to 0,8133	No	ns	>0,9999															0:DIX23 (PCSS1) vs. 0.0001:DIX21 (PIME4)	-0.5071	-1,180 to 0,1654	No	ns	0.6894					0:PAGA2 vs. 10-4:PMFA1	0.05463	-0,1060 to 0,2153	No	ns	>0,9999					0:DIX23 (PCSS1) vs. 0.0001:DIX21 (PIME4)	-0.1238	-0,7413 to 0,4937	No	ns	>0,9999
	0:PAGA2 vs. 10-4:PFIG1	0.4283	-0,2442 to 1,101	No	ns	0.9674															0:DIX23 (PCSS1) vs. 0.0001:DIX22 (PHPF1)	0.2314	-0,4411 to 0,9039	No	ns	>0,9999					0:PAGA2 vs. 10-4:PFIG1	-0.05068	-0,2113 to 0,1099	No	ns	>0,9999					0:DIX23 (PCSS1) vs. 0.0001:DIX22 (PHPF1)	-0.7128	-1,330 to -0,09525	Yes	**	0.0035
	0:PAGA2 vs. 10-4:PAGA2	0.08242	-0,3682 to 0,5330	No	ns	>0,9999															0:DIX23 (PCSS1) vs. 0.0001:DIX23 (PCSS1)	0.08242	-0,3682 to 0,5330	No	ns	>0,9999					0:PAGA2 vs. 10-4:PAGA2	0.02435	-0,08328 to 0,1320	No	ns	>0,9999					0:DIX23 (PCSS1) vs. 0.0001:DIX23 (PCSS1)	0.05807	-0,3557 to 0,4718	No	ns	>0,9999
	0:PAGA2 vs. 10-4:PFUS1	-0.1132	-0,7857 to 0,5592	No	ns	>0,9999															0:DIX23 (PCSS1) vs. 0.0001:DIX24 (PFUS1)	-1.375	-2,047 to -0,7021	Yes	****	<0,0001					0:PAGA2 vs. 10-4:PFUS1	-0.06071	-0,2213 to 0,09991	No	ns	>0,9999					0:DIX23 (PCSS1) vs. 0.0001:DIX24 (PFUS1)	-1.569	-2,186 to -0,9513	Yes	****	<0,0001
	0:PAGA2 vs. 10-4:PMFA2	-1.24	-1,912 to -0,5671	Yes	****	<0,0001															0:DIX23 (PCSS1) vs. 0.0001:DIX25 (PFIG1)	-1.299	-1,972 to -0,6266	Yes	****	<0,0001					0:PAGA2 vs. 10-4:PMFA2	0.06013	-0,1005 to 0,2208	No	ns	>0,9999					0:DIX23 (PCSS1) vs. 0.0001:DIX25 (PFIG1)	-1.037	-1,655 to -0,4197	Yes	****	<0,0001
	0:PAGA2 vs. 10-3:PCSS1	0.9819	0,3094 to 1,654	Yes	****	<0,0001															0:DIX23 (PCSS1) vs. 0.001:DIX17 (PMFA2)	-1.156	-1,829 to -0,4837	Yes	****	<0,0001					0:PAGA2 vs. 10-3:PCSS1	-0.134	-0,2946 to 0,02665	No	ns	0.3873					0:DIX23 (PCSS1) vs. 0.001:DIX17 (PMFA2)	-3.274	-3,892 to -2,657	Yes	****	<0,0001
	0:PAGA2 vs. 10-3:PIME4	0.7676	0,09513 to 1,440	Yes	**	0.0045															0:DIX23 (PCSS1) vs. 0.001:DIX18 (PMFA1)	-1.171	-1,843 to -0,4984	Yes	****	<0,0001					0:PAGA2 vs. 10-3:PIME4	-0.1664	-0,3270 to -0,005783	Yes	*	0.0284					0:DIX23 (PCSS1) vs. 0.001:DIX18 (PMFA1)	-1.889	-2,506 to -1,271	Yes	****	<0,0001
	0:PAGA2 vs. 10-3:PHPF1	0.3008	-0,3717 to 0,9733	No	ns	>0,9999															0:DIX23 (PCSS1) vs. 0.001:DIX19 (PAGA2)	-1.468	-2,141 to -0,7957	Yes	****	<0,0001					0:PAGA2 vs. 10-3:PHPF1	-0.04424	-0,2049 to 0,1164	No	ns	>0,9999					0:DIX23 (PCSS1) vs. 0.001:DIX19 (PAGA2)	-1.917	-2,534 to -1,299	Yes	****	<0,0001
	0:PAGA2 vs. 10-3:PYCL076W	0.1211	-0,5513 to 0,7936	No	ns	>0,9999															0:DIX23 (PCSS1) vs. 0.001:DIX20 (PYCL076W)	-1.722	-2,394 to -1,049	Yes	****	<0,0001					0:PAGA2 vs. 10-3:PYCL076W	-0.1346	-0,2952 to 0,02600	No	ns	0.3734					0:DIX23 (PCSS1) vs. 0.001:DIX20 (PYCL076W)	-1.26	-1,878 to -0,6430	Yes	****	<0,0001
	0:PAGA2 vs. 10-3:PMFA1	-0.4445	-1,117 to 0,2280	No	ns	0.9387															0:DIX23 (PCSS1) vs. 0.001:DIX21 (PIME4)	-1.092	-1,765 to -0,4199	Yes	****	<0,0001					0:PAGA2 vs. 10-3:PMFA1	-0.07219	-0,2328 to 0,08843	No	ns	>0,9999					0:DIX23 (PCSS1) vs. 0.001:DIX21 (PIME4)	-0.5822	-1,200 to 0,03530	No	ns	0.1132
	0:PAGA2 vs. 10-3:PFIG1	-0.1569	-0,8294 to 0,5156	No	ns	>0,9999															0:DIX23 (PCSS1) vs. 0.001:DIX22 (PHPF1)	-0.3539	-1,026 to 0,3186	No	ns	0.9997					0:PAGA2 vs. 10-3:PFIG1	-0.1775	-0,3381 to -0,01688	Yes	**	0.0087					0:DIX23 (PCSS1) vs. 0.001:DIX22 (PHPF1)	-1.171	-1,789 to -0,5537	Yes	****	<0,0001
	0:PAGA2 vs. 10-3:PAGA2	-0.5029	-0,9535 to -0,05224	Yes	**	0.0072															0:DIX23 (PCSS1) vs. 0.001:DIX23 (PCSS1)	-0.5029	-0,9535 to -0,05224	Yes	**	0.0072					0:PAGA2 vs. 10-3:PAGA2	-0.1025	-0,2101 to 0,005151	No	ns	0.0998					0:DIX23 (PCSS1) vs. 0.001:DIX23 (PCSS1)	-0.4004	-0,8142 to 0,01340	No	ns	0.0805
	0:PAGA2 vs. 10-3:PFUS1	-0.6985	-1,371 to -0,02603	Yes	*	0.0272															0:DIX23 (PCSS1) vs. 0.001:DIX24 (PFUS1)	-1.96	-2,632 to -1,287	Yes	****	<0,0001					0:PAGA2 vs. 10-3:PFUS1	-0.1875	-0,3482 to -0,02692	Yes	**	0.0027					0:DIX23 (PCSS1) vs. 0.001:DIX24 (PFUS1)	-2.027	-2,645 to -1,410	Yes	****	<0,0001
	0:PAGA2 vs. 10-3:PMFA2	-1.825	-2,497 to -1,152	Yes	****	<0,0001															0:DIX23 (PCSS1) vs. 0.001:DIX25 (PFIG1)	-1.884	-2,557 to -1,212	Yes	****	<0,0001					0:PAGA2 vs. 10-3:PMFA2	-0.0667	-0,2273 to 0,09393	No	ns	>0,9999					0:DIX23 (PCSS1) vs. 0.001:DIX25 (PFIG1)	-1.496	-2,113 to -0,8782	Yes	****	<0,0001
	0:PAGA2 vs. 10-2:PCSS1	0.2941	-0,3783 to 0,9666	No	ns	>0,9999															0:DIX23 (PCSS1) vs. 0.01:DIX17 (PMFA2)	-1.844	-2,516 to -1,171	Yes	****	<0,0001					0:PAGA2 vs. 10-2:PCSS1	-0.441	-0,6016 to -0,2804	Yes	****	<0,0001					0:DIX23 (PCSS1) vs. 0.01:DIX17 (PMFA2)	-3.655	-4,273 to -3,038	Yes	****	<0,0001
	0:PAGA2 vs. 10-2:PIME4	0.07988	-0,5926 to 0,7524	No	ns	>0,9999															0:DIX23 (PCSS1) vs. 0.01:DIX18 (PMFA1)	-1.859	-2,531 to -1,186	Yes	****	<0,0001					0:PAGA2 vs. 10-2:PIME4	-0.4734	-0,6341 to -0,3128	Yes	****	<0,0001					0:DIX23 (PCSS1) vs. 0.01:DIX18 (PMFA1)	-2.269	-2,887 to -1,652	Yes	****	<0,0001
	0:PAGA2 vs. 10-2:PHPF1	-0.3869	-1,059 to 0,2855	No	ns	0.9963															0:DIX23 (PCSS1) vs. 0.01:DIX19 (PAGA2)	-2.156	-2,828 to -1,483	Yes	****	<0,0001					0:PAGA2 vs. 10-2:PHPF1	-0.3513	-0,5119 to -0,1906	Yes	****	<0,0001					0:DIX23 (PCSS1) vs. 0.01:DIX19 (PAGA2)	-2.297	-2,915 to -1,680	Yes	****	<0,0001
	0:PAGA2 vs. 10-2:PYCL076W	-0.5666	-1,239 to 0,1059	No	ns	0.3583															0:DIX23 (PCSS1) vs. 0.01:DIX20 (PYCL076W)	-2.409	-3,082 to -1,737	Yes	****	<0,0001					0:PAGA2 vs. 10-2:PYCL076W	-0.4417	-0,6023 to -0,2810	Yes	****	<0,0001					0:DIX23 (PCSS1) vs. 0.01:DIX20 (PYCL076W)	-1.641	-2,259 to -1,024	Yes	****	<0,0001
	0:PAGA2 vs. 10-2:PMFA1	-1.132	-1,805 to -0,4598	Yes	****	<0,0001															0:DIX23 (PCSS1) vs. 0.01:DIX21 (PIME4)	-1.78	-2,453 to -1,108	Yes	****	<0,0001					0:PAGA2 vs. 10-2:PMFA1	-0.3792	-0,5399 to -0,2186	Yes	****	<0,0001					0:DIX23 (PCSS1) vs. 0.01:DIX21 (PIME4)	-0.9629	-1,580 to -0,3454	Yes	****	<0,0001
	0:PAGA2 vs. 10-2:PFIG1	-0.8447	-1,517 to -0,1722	Yes	***	0.0005															0:DIX23 (PCSS1) vs. 0.01:DIX22 (PHPF1)	-1.042	-1,714 to -0,3691	Yes	****	<0,0001					0:PAGA2 vs. 10-2:PFIG1	-0.4845	-0,6452 to -0,3239	Yes	****	<0,0001					0:DIX23 (PCSS1) vs. 0.01:DIX22 (PHPF1)	-1.552	-2,169 to -0,9344	Yes	****	<0,0001
	0:PAGA2 vs. 10-2:PAGA2	-1.191	-1,641 to -0,7400	Yes	****	<0,0001															0:DIX23 (PCSS1) vs. 0.01:DIX23 (PCSS1)	-1.191	-1,641 to -0,7400	Yes	****	<0,0001					0:PAGA2 vs. 10-2:PAGA2	-0.4095	-0,5171 to -0,3019	Yes	****	<0,0001					0:DIX23 (PCSS1) vs. 0.01:DIX23 (PCSS1)	-0.7811	-1,195 to -0,3673	Yes	****	<0,0001
	0:PAGA2 vs. 10-2:PFUS1	-1.386	-2,059 to -0,7138	Yes	****	<0,0001															0:DIX23 (PCSS1) vs. 0.01:DIX24 (PFUS1)	-2.648	-3,320 to -1,975	Yes	****	<0,0001					0:PAGA2 vs. 10-2:PFUS1	-0.4946	-0,6552 to -0,3339	Yes	****	<0,0001					0:DIX23 (PCSS1) vs. 0.01:DIX24 (PFUS1)	-2.408	-3,025 to -1,790	Yes	****	<0,0001
	0:PAGA2 vs. 10-2:PMFA2	-2.513	-3,185 to -1,840	Yes	****	<0,0001															0:DIX23 (PCSS1) vs. 0.01:DIX25 (PFIG1)	-2.572	-3,245 to -1,900	Yes	****	<0,0001					0:PAGA2 vs. 10-2:PMFA2	-0.3737	-0,5344 to -0,2131	Yes	****	<0,0001					0:DIX23 (PCSS1) vs. 0.01:DIX25 (PFIG1)	-1.876	-2,494 to -1,259	Yes	****	<0,0001
	0:PAGA2 vs. 10-1:Neg.Con.	0.7505	-0,05330 to 1,554	No	ns	0.1278															0:DIX23 (PCSS1) vs. 0.1:DIX14 (Neg.Con.)	-1.352	-2,156 to -0,5487	Yes	****	<0,0001					0:PAGA2 vs. 10-1:Neg.Con.	-0.4813	-0,6732 to -0,2893	Yes	****	<0,0001					0:DIX23 (PCSS1) vs. 0.1:DIX14 (Neg.Con.)	-0.2845	-1,023 to 0,4536	No	ns	>0,9999
	0:PAGA2 vs. 10-1:PPGK1	-1.577	-2,381 to -0,7730	Yes	****	<0,0001															0:DIX23 (PCSS1) vs. 0.1:DIX27 (PPGK1)	-1.346	-2,149 to -0,5418	Yes	****	<0,0001					0:PAGA2 vs. 10-1:PPGK1	-0.4523	-0,6443 to -0,2603	Yes	****	<0,0001					0:DIX23 (PCSS1) vs. 0.1:DIX27 (PPGK1)	-2.641	-3,379 to -1,903	Yes	****	<0,0001
	0:PAGA2 vs. 10-1:PTDH3	-2.521	-3,325 to -1,717	Yes	****	<0,0001															0:DIX23 (PCSS1) vs. 0.1:DIX28 (PTDH3)	-1.37	-2,174 to -0,5666	Yes	****	<0,0001					0:PAGA2 vs. 10-1:PTDH3	-0.4812	-0,6732 to -0,2892	Yes	****	<0,0001					0:DIX23 (PCSS1) vs. 0.1:DIX28 (PTDH3)	-3.556	-4,294 to -2,818	Yes	****	<0,0001
	0:PAGA2 vs. 10-1:PCSS1	0.1674	-0,4770 to 0,8119	No	ns	>0,9999															0:DIX23 (PCSS1) vs. 0.1:DIX17 (PMFA2)	-1.971	-2,615 to -1,326	Yes	****	<0,0001					0:PAGA2 vs. 10-1:PCSS1	-0.5656	-0,7195 to -0,4116	Yes	****	<0,0001					0:DIX23 (PCSS1) vs. 0.1:DIX17 (PMFA2)	-3.657	-4,249 to -3,066	Yes	****	<0,0001
	0:PAGA2 vs. 10-1:PIME4	-0.04683	-0,6913 to 0,5976	No	ns	>0,9999															0:DIX23 (PCSS1) vs. 0.1:DIX18 (PMFA1)	-1.985	-2,630 to -1,341	Yes	****	<0,0001					0:PAGA2 vs. 10-1:PIME4	-0.598	-0,7519 to -0,4441	Yes	****	<0,0001					0:DIX23 (PCSS1) vs. 0.1:DIX18 (PMFA1)	-2.271	-2,863 to -1,680	Yes	****	<0,0001
	0:PAGA2 vs. 10-1:PHPF1	-0.5136	-1,158 to 0,1308	No	ns	0.5252															0:DIX23 (PCSS1) vs. 0.1:DIX19 (PAGA2)	-2.283	-2,927 to -1,638	Yes	****	<0,0001					0:PAGA2 vs. 10-1:PHPF1	-0.4758	-0,6297 to -0,3219	Yes	****	<0,0001					0:DIX23 (PCSS1) vs. 0.1:DIX19 (PAGA2)	-2.299	-2,891 to -1,708	Yes	****	<0,0001
	0:PAGA2 vs. 10-1:PYCL076W	-0.6933	-1,338 to -0,04883	Yes	*	0.0146															0:DIX23 (PCSS1) vs. 0.1:DIX20 (PYCL076W)	-2.536	-3,181 to -1,892	Yes	****	<0,0001					0:PAGA2 vs. 10-1:PYCL076W	-0.5662	-0,7201 to -0,4123	Yes	****	<0,0001					0:DIX23 (PCSS1) vs. 0.1:DIX20 (PYCL076W)	-1.643	-2,235 to -1,052	Yes	****	<0,0001
	0:PAGA2 vs. 10-1:PMFA1	-1.259	-1,903 to -0,6145	Yes	****	<0,0001															0:DIX23 (PCSS1) vs. 0.1:DIX21 (PIME4)	-1.907	-2,551 to -1,262	Yes	****	<0,0001					0:PAGA2 vs. 10-1:PMFA1	-0.5038	-0,6577 to -0,3498	Yes	****	<0,0001					0:DIX23 (PCSS1) vs. 0.1:DIX21 (PIME4)	-0.9651	-1,557 to -0,3733	Yes	****	<0,0001
	0:PAGA2 vs. 10-1:PFIG1	-0.9714	-1,616 to -0,3269	Yes	****	<0,0001															0:DIX23 (PCSS1) vs. 0.1:DIX22 (PHPF1)	-1.168	-1,813 to -0,5239	Yes	****	<0,0001					0:PAGA2 vs. 10-1:PFIG1	-0.6091	-0,7630 to -0,4552	Yes	****	<0,0001					0:DIX23 (PCSS1) vs. 0.1:DIX22 (PHPF1)	-1.554	-2,146 to -0,9623	Yes	****	<0,0001
	0:PAGA2 vs. 10-1:PAGA2	-1.317	-1,725 to -0,9097	Yes	****	<0,0001															0:DIX23 (PCSS1) vs. 0.1:DIX23 (PCSS1)	-1.317	-1,725 to -0,9097	Yes	****	<0,0001					0:PAGA2 vs. 10-1:PAGA2	-0.5341	-0,6314 to -0,4367	Yes	****	<0,0001					0:DIX23 (PCSS1) vs. 0.1:DIX23 (PCSS1)	-0.7832	-1,158 to -0,4090	Yes	****	<0,0001
	0:PAGA2 vs. 10-1:PFUS1	-1.513	-2,157 to -0,8685	Yes	****	<0,0001															0:DIX23 (PCSS1) vs. 0.1:DIX24 (PFUS1)	-2.774	-3,419 to -2,130	Yes	****	<0,0001					0:PAGA2 vs. 10-1:PFUS1	-0.6191	-0,7730 to -0,4652	Yes	****	<0,0001					0:DIX23 (PCSS1) vs. 0.1:DIX24 (PFUS1)	-2.41	-3,002 to -1,818	Yes	****	<0,0001
	0:PAGA2 vs. 10-1:PMFA2	-2.639	-3,284 to -1,995	Yes	****	<0,0001															0:DIX23 (PCSS1) vs. 0.1:DIX25 (PFIG1)	-2.699	-3,343 to -2,054	Yes	****	<0,0001					0:PAGA2 vs. 10-1:PMFA2	-0.4983	-0,6522 to -0,3443	Yes	****	<0,0001					0:DIX23 (PCSS1) vs. 0.1:DIX25 (PFIG1)	-1.879	-2,470 to -1,287	Yes	****	<0,0001
	0:PAGA2 vs. 100:PCSS1	0.004471	-0,6680 to 0,6770	No	ns	>0,9999															0:DIX23 (PCSS1) vs. 1:DIX17 (PMFA2)	-2.134	-2,806 to -1,461	Yes	****	<0,0001					0:PAGA2 vs. 100:PCSS1	-0.6084	-0,7690 to -0,4478	Yes	****	<0,0001					0:DIX23 (PCSS1) vs. 1:DIX17 (PMFA2)	-3.777	-4,395 to -3,160	Yes	****	<0,0001
	0:PAGA2 vs. 100:PIME4	-0.2098	-0,8823 to 0,4627	No	ns	>0,9999															0:DIX23 (PCSS1) vs. 1:DIX18 (PMFA1)	-2.148	-2,821 to -1,476	Yes	****	<0,0001					0:PAGA2 vs. 100:PIME4	-0.6408	-0,8015 to -0,4802	Yes	****	<0,0001					0:DIX23 (PCSS1) vs. 1:DIX18 (PMFA1)	-2.392	-3,009 to -1,774	Yes	****	<0,0001
	0:PAGA2 vs. 100:PHPF1	-0.6766	-1,349 to -0,004138	Yes	*	0.0455															0:DIX23 (PCSS1) vs. 1:DIX19 (PAGA2)	-2.446	-3,118 to -1,773	Yes	****	<0,0001					0:PAGA2 vs. 100:PHPF1	-0.5187	-0,6793 to -0,3580	Yes	****	<0,0001					0:DIX23 (PCSS1) vs. 1:DIX19 (PAGA2)	-2.42	-3,037 to -1,802	Yes	****	<0,0001
	0:PAGA2 vs. 100:PYCL076W	-0.8563	-1,529 to -0,1838	Yes	***	0.0003															0:DIX23 (PCSS1) vs. 1:DIX20 (PYCL076W)	-2.699	-3,372 to -2,027	Yes	****	<0,0001					0:PAGA2 vs. 100:PYCL076W	-0.6091	-0,7697 to -0,4484	Yes	****	<0,0001					0:DIX23 (PCSS1) vs. 1:DIX20 (PYCL076W)	-1.763	-2,381 to -1,146	Yes	****	<0,0001
	0:PAGA2 vs. 100:PMFA1	-1.422	-2,094 to -0,7494	Yes	****	<0,0001															0:DIX23 (PCSS1) vs. 1:DIX21 (PIME4)	-2.07	-2,742 to -1,397	Yes	****	<0,0001					0:PAGA2 vs. 100:PMFA1	-0.5466	-0,7073 to -0,3860	Yes	****	<0,0001					0:DIX23 (PCSS1) vs. 1:DIX21 (PIME4)	-1.085	-1,703 to -0,4677	Yes	****	<0,0001
	0:PAGA2 vs. 100:PFIG1	-1.134	-1,807 to -0,4619	Yes	****	<0,0001															0:DIX23 (PCSS1) vs. 1:DIX22 (PHPF1)	-1.331	-2,004 to -0,6588	Yes	****	<0,0001					0:PAGA2 vs. 100:PFIG1	-0.6519	-0,8126 to -0,4913	Yes	****	<0,0001					0:DIX23 (PCSS1) vs. 1:DIX22 (PHPF1)	-1.674	-2,292 to -1,057	Yes	****	<0,0001
	0:PAGA2 vs. 100:PAGA2	-1.48	-1,931 to -1,030	Yes	****	<0,0001															0:DIX23 (PCSS1) vs. 1:DIX23 (PCSS1)	-1.48	-1,931 to -1,030	Yes	****	<0,0001					0:PAGA2 vs. 100:PAGA2	-0.5769	-0,6845 to -0,4693	Yes	****	<0,0001					0:DIX23 (PCSS1) vs. 1:DIX23 (PCSS1)	-0.9034	-1,317 to -0,4896	Yes	****	<0,0001
	0:PAGA2 vs. 100:PFUS1	-1.676	-2,348 to -1,003	Yes	****	<0,0001															0:DIX23 (PCSS1) vs. 1:DIX24 (PFUS1)	-2.937	-3,610 to -2,265	Yes	****	<0,0001					0:PAGA2 vs. 100:PFUS1	-0.662	-0,8226 to -0,5013	Yes	****	<0,0001					0:DIX23 (PCSS1) vs. 1:DIX24 (PFUS1)	-2.53	-3,148 to -1,913	Yes	****	<0,0001
	0:PAGA2 vs. 100:PMFA2	-2.802	-3,475 to -2,130	Yes	****	<0,0001															0:DIX23 (PCSS1) vs. 1:DIX25 (PFIG1)	-2.862	-3,534 to -2,189	Yes	****	<0,0001					0:PAGA2 vs. 100:PMFA2	-0.5411	-0,7018 to -0,3805	Yes	****	<0,0001					0:DIX23 (PCSS1) vs. 1:DIX25 (PFIG1)	-1.999	-2,616 to -1,381	Yes	****	<0,0001
	0:PAGA2 vs. 101:PCSS1	0.06497	-0,6075 to 0,7375	No	ns	>0,9999															0:DIX23 (PCSS1) vs. 10:DIX17 (PMFA2)	-2.073	-2,746 to -1,401	Yes	****	<0,0001					0:PAGA2 vs. 101:PCSS1	-0.5342	-0,6948 to -0,3735	Yes	****	<0,0001					0:DIX23 (PCSS1) vs. 10:DIX17 (PMFA2)	-3.791	-4,409 to -3,174	Yes	****	<0,0001
	0:PAGA2 vs. 101:PIME4	-0.1493	-0,8218 to 0,5232	No	ns	>0,9999															0:DIX23 (PCSS1) vs. 10:DIX18 (PMFA1)	-2.088	-2,760 to -1,415	Yes	****	<0,0001					0:PAGA2 vs. 101:PIME4	-0.5666	-0,7272 to -0,4060	Yes	****	<0,0001					0:DIX23 (PCSS1) vs. 10:DIX18 (PMFA1)	-2.405	-3,023 to -1,788	Yes	****	<0,0001
	0:PAGA2 vs. 101:PHPF1	-0.6161	-1,289 to 0,05636	No	ns	0.1597															0:DIX23 (PCSS1) vs. 10:DIX19 (PAGA2)	-2.385	-3,058 to -1,713	Yes	****	<0,0001					0:PAGA2 vs. 101:PHPF1	-0.4444	-0,6050 to -0,2838	Yes	****	<0,0001					0:DIX23 (PCSS1) vs. 10:DIX19 (PAGA2)	-2.433	-3,051 to -1,816	Yes	****	<0,0001
	0:PAGA2 vs. 101:PYCL076W	-0.7958	-1,468 to -0,1233	Yes	**	0.002															0:DIX23 (PCSS1) vs. 10:DIX20 (PYCL076W)	-2.639	-3,311 to -1,966	Yes	****	<0,0001					0:PAGA2 vs. 101:PYCL076W	-0.5348	-0,6954 to -0,3742	Yes	****	<0,0001					0:DIX23 (PCSS1) vs. 10:DIX20 (PYCL076W)	-1.777	-2,395 to -1,160	Yes	****	<0,0001
	0:PAGA2 vs. 101:PMFA1	-1.361	-2,034 to -0,6889	Yes	****	<0,0001															0:DIX23 (PCSS1) vs. 10:DIX21 (PIME4)	-2.009	-2,682 to -1,337	Yes	****	<0,0001					0:PAGA2 vs. 101:PMFA1	-0.4724	-0,6330 to -0,3117	Yes	****	<0,0001					0:DIX23 (PCSS1) vs. 10:DIX21 (PIME4)	-1.099	-1,716 to -0,4814	Yes	****	<0,0001
	0:PAGA2 vs. 101:PFIG1	-1.074	-1,746 to -0,4014	Yes	****	<0,0001															0:DIX23 (PCSS1) vs. 10:DIX22 (PHPF1)	-1.271	-1,943 to -0,5983	Yes	****	<0,0001					0:PAGA2 vs. 101:PFIG1	-0.5777	-0,7383 to -0,4171	Yes	****	<0,0001					0:DIX23 (PCSS1) vs. 10:DIX22 (PHPF1)	-1.688	-2,305 to -1,070	Yes	****	<0,0001
	0:PAGA2 vs. 101:PAGA2	-1.42	-1,870 to -0,9692	Yes	****	<0,0001															0:DIX23 (PCSS1) vs. 10:DIX23 (PCSS1)	-1.42	-1,870 to -0,9692	Yes	****	<0,0001					0:PAGA2 vs. 101:PAGA2	-0.5027	-0,6103 to -0,3950	Yes	****	<0,0001					0:DIX23 (PCSS1) vs. 10:DIX23 (PCSS1)	-0.9171	-1,331 to -0,5033	Yes	****	<0,0001
	0:PAGA2 vs. 101:PFUS1	-1.615	-2,288 to -0,9429	Yes	****	<0,0001															0:DIX23 (PCSS1) vs. 10:DIX24 (PFUS1)	-2.877	-3,549 to -2,204	Yes	****	<0,0001					0:PAGA2 vs. 101:PFUS1	-0.5877	-0,7483 to -0,4271	Yes	****	<0,0001					0:DIX23 (PCSS1) vs. 10:DIX24 (PFUS1)	-2.544	-3,161 to -1,926	Yes	****	<0,0001
	0:PAGA2 vs. 101:PMFA2	-2.742	-3,414 to -2,069	Yes	****	<0,0001															0:DIX23 (PCSS1) vs. 10:DIX25 (PFIG1)	-2.801	-3,474 to -2,129	Yes	****	<0,0001					0:PAGA2 vs. 101:PMFA2	-0.4669	-0,6275 to -0,3062	Yes	****	<0,0001					0:DIX23 (PCSS1) vs. 10:DIX25 (PFIG1)	-2.012	-2,630 to -1,395	Yes	****	<0,0001
	0:PAGA2 vs. 102:Neg.Con.	0.7126	-0,09122 to 1,516	No	ns	0.227															0:DIX23 (PCSS1) vs. 100:DIX14 (Neg.Con.)	-1.39	-2,194 to -0,5866	Yes	****	<0,0001					0:PAGA2 vs. 102:Neg.Con.	-0.4682	-0,6602 to -0,2762	Yes	****	<0,0001					0:DIX23 (PCSS1) vs. 100:DIX14 (Neg.Con.)	-0.3355	-1,074 to 0,4026	No	ns	>0,9999
	0:PAGA2 vs. 102:PPGK1	-1.615	-2,418 to -0,8109	Yes	****	<0,0001															0:DIX23 (PCSS1) vs. 100:DIX27 (PPGK1)	-1.383	-2,187 to -0,5797	Yes	****	<0,0001					0:PAGA2 vs. 102:PPGK1	-0.4393	-0,6313 to -0,2473	Yes	****	<0,0001					0:DIX23 (PCSS1) vs. 100:DIX27 (PPGK1)	-2.692	-3,430 to -1,954	Yes	****	<0,0001
	0:PAGA2 vs. 102:PTDH3	-2.559	-3,363 to -1,755	Yes	****	<0,0001															0:DIX23 (PCSS1) vs. 100:DIX28 (PTDH3)	-1.408	-2,212 to -0,6045	Yes	****	<0,0001					0:PAGA2 vs. 102:PTDH3	-0.4682	-0,6601 to -0,2762	Yes	****	<0,0001					0:DIX23 (PCSS1) vs. 100:DIX28 (PTDH3)	-3.607	-4,345 to -2,869	Yes	****	<0,0001
	0:PAGA2 vs. 102:PCSS1	0.1295	-0,5149 to 0,7740	No	ns	>0,9999															0:DIX23 (PCSS1) vs. 100:DIX17 (PMFA2)	-2.009	-2,653 to -1,364	Yes	****	<0,0001					0:PAGA2 vs. 102:PCSS1	-0.5525	-0,7064 to -0,3986	Yes	****	<0,0001					0:DIX23 (PCSS1) vs. 100:DIX17 (PMFA2)	-3.708	-4,300 to -3,117	Yes	****	<0,0001
	0:PAGA2 vs. 102:PIME4	-0.08475	-0,7292 to 0,5597	No	ns	>0,9999															0:DIX23 (PCSS1) vs. 100:DIX18 (PMFA1)	-2.023	-2,668 to -1,379	Yes	****	<0,0001					0:PAGA2 vs. 102:PIME4	-0.5849	-0,7389 to -0,4310	Yes	****	<0,0001					0:DIX23 (PCSS1) vs. 100:DIX18 (PMFA1)	-2.322	-2,914 to -1,731	Yes	****	<0,0001
	0:PAGA2 vs. 102:PHPF1	-0.5516	-1,196 to 0,09289	No	ns	0.3147															0:DIX23 (PCSS1) vs. 100:DIX19 (PAGA2)	-2.321	-2,965 to -1,676	Yes	****	<0,0001					0:PAGA2 vs. 102:PHPF1	-0.4628	-0,6167 to -0,3088	Yes	****	<0,0001					0:DIX23 (PCSS1) vs. 100:DIX19 (PAGA2)	-2.35	-2,942 to -1,759	Yes	****	<0,0001
	0:PAGA2 vs. 102:PYCL076W	-0.7312	-1,376 to -0,08676	Yes	**	0.0051															0:DIX23 (PCSS1) vs. 100:DIX20 (PYCL076W)	-2.574	-3,218 to -1,930	Yes	****	<0,0001					0:PAGA2 vs. 102:PYCL076W	-0.5531	-0,7071 to -0,3992	Yes	****	<0,0001					0:DIX23 (PCSS1) vs. 100:DIX20 (PYCL076W)	-1.694	-2,286 to -1,103	Yes	****	<0,0001
	0:PAGA2 vs. 102:PMFA1	-1.297	-1,941 to -0,6524	Yes	****	<0,0001															0:DIX23 (PCSS1) vs. 100:DIX21 (PIME4)	-1.945	-2,589 to -1,300	Yes	****	<0,0001					0:PAGA2 vs. 102:PMFA1	-0.4907	-0,6446 to -0,3368	Yes	****	<0,0001					0:DIX23 (PCSS1) vs. 100:DIX21 (PIME4)	-1.016	-1,608 to -0,4243	Yes	****	<0,0001
	0:PAGA2 vs. 102:PFIG1	-1.009	-1,654 to -0,3648	Yes	****	<0,0001															0:DIX23 (PCSS1) vs. 100:DIX22 (PHPF1)	-1.206	-1,851 to -0,5618	Yes	****	<0,0001					0:PAGA2 vs. 102:PFIG1	-0.596	-0,7500 to -0,4421	Yes	****	<0,0001					0:DIX23 (PCSS1) vs. 100:DIX22 (PHPF1)	-1.605	-2,197 to -1,013	Yes	****	<0,0001
	0:PAGA2 vs. 102:PAGA2	-1.355	-1,763 to -0,9476	Yes	****	<0,0001															0:DIX23 (PCSS1) vs. 100:DIX23 (PCSS1)	-1.355	-1,763 to -0,9476	Yes	****	<0,0001					0:PAGA2 vs. 102:PAGA2	-0.521	-0,6183 to -0,4236	Yes	****	<0,0001					0:DIX23 (PCSS1) vs. 100:DIX23 (PCSS1)	-0.8342	-1,208 to -0,4600	Yes	****	<0,0001
	0:PAGA2 vs. 102:PFUS1	-1.551	-2,195 to -0,9064	Yes	****	<0,0001															0:DIX23 (PCSS1) vs. 100:DIX24 (PFUS1)	-2.812	-3,457 to -2,168	Yes	****	<0,0001					0:PAGA2 vs. 102:PFUS1	-0.6061	-0,7600 to -0,4521	Yes	****	<0,0001					0:DIX23 (PCSS1) vs. 100:DIX24 (PFUS1)	-2.461	-3,053 to -1,869	Yes	****	<0,0001
	0:PAGA2 vs. 102:PMFA2	-2.677	-3,322 to -2,033	Yes	****	<0,0001															0:DIX23 (PCSS1) vs. 100:DIX25 (PFIG1)	-2.737	-3,381 to -2,092	Yes	****	<0,0001					0:PAGA2 vs. 102:PMFA2	-0.4852	-0,6391 to -0,3313	Yes	****	<0,0001					0:DIX23 (PCSS1) vs. 100:DIX25 (PFIG1)	-1.93	-2,521 to -1,338	Yes	****	<0,0001
	0:PFUS1 vs. 0:PMFA2	-1.126	-1,626 to -0,6272	Yes	****	<0,0001															0:DIX24 (PFUS1) vs. 0:DIX25 (PFIG1)	0.0755	-0,4237 to 0,5747	No	ns	>0,9999					0:PFUS1 vs. 0:PMFA2	0.1208	0,001613 to 0,2401	Yes	*	0.0406					0:DIX24 (PFUS1) vs. 0:DIX25 (PFIG1)	0.5315	0,07316 to 0,9899	Yes	**	0.0032
	0:PFUS1 vs. 10-4:PCSS1	1.763	1,090 to 2,435	Yes	****	<0,0001															0:DIX24 (PFUS1) vs. 0.0001:DIX17 (PMFA2)	0.886	0,2135 to 1,559	Yes	***	0.0001					0:PFUS1 vs. 10-4:PCSS1	0.07791	-0,08271 to 0,2385	No	ns	>0,9999					0:DIX24 (PFUS1) vs. 0.0001:DIX17 (PMFA2)	-1.189	-1,807 to -0,5716	Yes	****	<0,0001
	0:PFUS1 vs. 10-4:PIME4	1.549	0,8761 to 2,221	Yes	****	<0,0001															0:DIX24 (PFUS1) vs. 0.0001:DIX18 (PMFA1)	0.8713	0,1988 to 1,544	Yes	***	0.0002					0:PFUS1 vs. 10-4:PIME4	0.04548	-0,1151 to 0,2061	No	ns	>0,9999					0:DIX24 (PFUS1) vs. 0.0001:DIX18 (PMFA1)	0.1967	-0,4208 to 0,8143	No	ns	>0,9999
	0:PFUS1 vs. 10-4:PHPF1	1.082	0,4092 to 1,754	Yes	****	<0,0001															0:DIX24 (PFUS1) vs. 0.0001:DIX19 (PAGA2)	0.5741	-0,09838 to 1,247	No	ns	0.3216					0:PFUS1 vs. 10-4:PHPF1	0.1677	0,007030 to 0,3283	Yes	*	0.025					0:DIX24 (PFUS1) vs. 0.0001:DIX19 (PAGA2)	0.1687	-0,4488 to 0,7862	No	ns	>0,9999
	0:PFUS1 vs. 10-4:PYCL076W	0.9021	0,2296 to 1,575	Yes	****	<0,0001															0:DIX24 (PFUS1) vs. 0.0001:DIX20 (PYCL076W)	0.3206	-0,3519 to 0,9931	No	ns	>0,9999					0:PFUS1 vs. 10-4:PYCL076W	0.07727	-0,08335 to 0,2379	No	ns	>0,9999					0:DIX24 (PFUS1) vs. 0.0001:DIX20 (PYCL076W)	0.8248	0,2073 to 1,442	Yes	****	<0,0001
	0:PFUS1 vs. 10-4:PMFA1	0.3364	-0,3360 to 1,009	No	ns	>0,9999															0:DIX24 (PFUS1) vs. 0.0001:DIX21 (PIME4)	0.9498	0,2774 to 1,622	Yes	****	<0,0001					0:PFUS1 vs. 10-4:PMFA1	0.1397	-0,02093 to 0,3003	No	ns	0.2728					0:DIX24 (PFUS1) vs. 0.0001:DIX21 (PIME4)	1.503	0,8856 to 2,121	Yes	****	<0,0001
	0:PFUS1 vs. 10-4:PFIG1	0.624	-0,04848 to 1,296	No	ns	0.1377															0:DIX24 (PFUS1) vs. 0.0001:DIX22 (PHPF1)	1.688	1,016 to 2,361	Yes	****	<0,0001					0:PFUS1 vs. 10-4:PFIG1	0.03439	-0,1262 to 0,1950	No	ns	>0,9999					0:DIX24 (PFUS1) vs. 0.0001:DIX22 (PHPF1)	0.9141	0,2966 to 1,532	Yes	****	<0,0001
	0:PFUS1 vs. 10-4:PAGA2	0.2781	-0,3944 to 0,9506	No	ns	>0,9999															0:DIX24 (PFUS1) vs. 0.0001:DIX23 (PCSS1)	1.539	0,8669 to 2,212	Yes	****	<0,0001					0:PFUS1 vs. 10-4:PAGA2	0.1094	-0,05121 to 0,2700	No	ns	0.9034					0:DIX24 (PFUS1) vs. 0.0001:DIX23 (PCSS1)	1.685	1,067 to 2,302	Yes	****	<0,0001
	0:PFUS1 vs. 10-4:PFUS1	0.08242	-0,3682 to 0,5330	No	ns	>0,9999															0:DIX24 (PFUS1) vs. 0.0001:DIX24 (PFUS1)	0.08242	-0,3682 to 0,5330	No	ns	>0,9999					0:PFUS1 vs. 10-4:PFUS1	0.02435	-0,08328 to 0,1320	No	ns	>0,9999					0:DIX24 (PFUS1) vs. 0.0001:DIX24 (PFUS1)	0.05807	-0,3557 to 0,4718	No	ns	>0,9999
	0:PFUS1 vs. 10-4:PMFA2	-1.044	-1,716 to -0,3715	Yes	****	<0,0001															0:DIX24 (PFUS1) vs. 0.0001:DIX25 (PFIG1)	0.1579	-0,5146 to 0,8304	No	ns	>0,9999					0:PFUS1 vs. 10-4:PMFA2	0.1452	-0,01543 to 0,3058	No	ns	0.1854					0:DIX24 (PFUS1) vs. 0.0001:DIX25 (PFIG1)	0.5896	-0,02790 to 1,207	No	ns	0.0962
	0:PFUS1 vs. 10-3:PCSS1	1.178	0,5051 to 1,850	Yes	****	<0,0001															0:DIX24 (PFUS1) vs. 0.001:DIX17 (PMFA2)	0.3008	-0,3717 to 0,9732	No	ns	>0,9999					0:PFUS1 vs. 10-3:PCSS1	-0.04892	-0,2095 to 0,1117	No	ns	>0,9999					0:DIX24 (PFUS1) vs. 0.001:DIX17 (PMFA2)	-1.648	-2,265 to -1,030	Yes	****	<0,0001
	0:PFUS1 vs. 10-3:PIME4	0.9633	0,2908 to 1,636	Yes	****	<0,0001															0:DIX24 (PFUS1) vs. 0.001:DIX18 (PMFA1)	0.286	-0,3864 to 0,9585	No	ns	>0,9999					0:PFUS1 vs. 10-3:PIME4	-0.08134	-0,2420 to 0,07928	No	ns	>0,9999					0:DIX24 (PFUS1) vs. 0.001:DIX18 (PMFA1)	-0.2617	-0,8792 to 0,3558	No	ns	>0,9999
	0:PFUS1 vs. 10-3:PHPF1	0.4965	-0,1760 to 1,169	No	ns	0.7458															0:DIX24 (PFUS1) vs. 0.001:DIX19 (PAGA2)	-0.01117	-0,6837 to 0,6613	No	ns	>0,9999					0:PFUS1 vs. 10-3:PHPF1	0.04083	-0,1198 to 0,2015	No	ns	>0,9999					0:DIX24 (PFUS1) vs. 0.001:DIX19 (PAGA2)	-0.2898	-0,9073 to 0,3277	No	ns	>0,9999
	0:PFUS1 vs. 10-3:PYCL076W	0.3168	-0,3557 to 0,9893	No	ns	>0,9999															0:DIX24 (PFUS1) vs. 0.001:DIX20 (PYCL076W)	-0.2647	-0,9372 to 0,4078	No	ns	>0,9999					0:PFUS1 vs. 10-3:PYCL076W	-0.04956	-0,2102 to 0,1111	No	ns	>0,9999					0:DIX24 (PFUS1) vs. 0.001:DIX20 (PYCL076W)	0.3664	-0,2511 to 0,9839	No	ns	0.9923
	0:PFUS1 vs. 10-3:PMFA1	-0.2488	-0,9213 to 0,4237	No	ns	>0,9999															0:DIX24 (PFUS1) vs. 0.001:DIX21 (PIME4)	0.3646	-0,3079 to 1,037	No	ns	0.9992					0:PFUS1 vs. 10-3:PMFA1	0.01287	-0,1478 to 0,1735	No	ns	>0,9999					0:DIX24 (PFUS1) vs. 0.001:DIX21 (PIME4)	1.045	0,4271 to 1,662	Yes	****	<0,0001
	0:PFUS1 vs. 10-3:PFIG1	0.03873	-0,6338 to 0,7112	No	ns	>0,9999															0:DIX24 (PFUS1) vs. 0.001:DIX22 (PHPF1)	1.103	0,4306 to 1,776	Yes	****	<0,0001					0:PFUS1 vs. 10-3:PFIG1	-0.09244	-0,2531 to 0,06818	No	ns	0.9963					0:DIX24 (PFUS1) vs. 0.001:DIX22 (PHPF1)	0.4556	-0,1619 to 1,073	No	ns	0.7472
	0:PFUS1 vs. 10-3:PAGA2	-0.3072	-0,9797 to 0,3653	No	ns	>0,9999															0:DIX24 (PFUS1) vs. 0.001:DIX23 (PCSS1)	0.9541	0,2816 to 1,627	Yes	****	<0,0001					0:PFUS1 vs. 10-3:PAGA2	-0.01741	-0,1780 to 0,1432	No	ns	>0,9999					0:DIX24 (PFUS1) vs. 0.001:DIX23 (PCSS1)	1.226	0,6090 to 1,844	Yes	****	<0,0001
	0:PFUS1 vs. 10-3:PFUS1	-0.5029	-0,9535 to -0,05224	Yes	**	0.0072															0:DIX24 (PFUS1) vs. 0.001:DIX24 (PFUS1)	-0.5029	-0,9535 to -0,05224	Yes	**	0.0072					0:PFUS1 vs. 10-3:PFUS1	-0.1025	-0,2101 to 0,005151	No	ns	0.0998					0:DIX24 (PFUS1) vs. 0.001:DIX24 (PFUS1)	-0.4004	-0,8142 to 0,01340	No	ns	0.0805
	0:PFUS1 vs. 10-3:PMFA2	-1.629	-2,302 to -0,9567	Yes	****	<0,0001															0:DIX24 (PFUS1) vs. 0.001:DIX25 (PFIG1)	-0.4274	-1,100 to 0,2451	No	ns	0.9688					0:PFUS1 vs. 10-3:PMFA2	0.01837	-0,1423 to 0,1790	No	ns	>0,9999					0:DIX24 (PFUS1) vs. 0.001:DIX25 (PFIG1)	0.1312	-0,4863 to 0,7487	No	ns	>0,9999
	0:PFUS1 vs. 10-2:PCSS1	0.4898	-0,1827 to 1,162	No	ns	0.7786															0:DIX24 (PFUS1) vs. 0.01:DIX17 (PMFA2)	-0.387	-1,059 to 0,2855	No	ns	0.9963					0:PFUS1 vs. 10-2:PCSS1	-0.3559	-0,5166 to -0,1953	Yes	****	<0,0001					0:DIX24 (PFUS1) vs. 0.01:DIX17 (PMFA2)	-2.028	-2,646 to -1,411	Yes	****	<0,0001
	0:PFUS1 vs. 10-2:PIME4	0.2755	-0,3969 to 0,9480	No	ns	>0,9999															0:DIX24 (PFUS1) vs. 0.01:DIX18 (PMFA1)	-0.4017	-1,074 to 0,2708	No	ns	0.9911					0:PFUS1 vs. 10-2:PIME4	-0.3884	-0,5490 to -0,2278	Yes	****	<0,0001					0:DIX24 (PFUS1) vs. 0.01:DIX18 (PMFA1)	-0.6424	-1,260 to -0,02490	Yes	*	0.0265
	0:PFUS1 vs. 10-2:PHPF1	-0.1913	-0,8638 to 0,4812	No	ns	>0,9999															0:DIX24 (PFUS1) vs. 0.01:DIX19 (PAGA2)	-0.6989	-1,371 to -0,02642	Yes	*	0.0269					0:PFUS1 vs. 10-2:PHPF1	-0.2662	-0,4268 to -0,1056	Yes	****	<0,0001					0:DIX24 (PFUS1) vs. 0.01:DIX19 (PAGA2)	-0.6705	-1,288 to -0,05296	Yes	*	0.0123
	0:PFUS1 vs. 10-2:PYCL076W	-0.3709	-1,043 to 0,3016	No	ns	0.9988															0:DIX24 (PFUS1) vs. 0.01:DIX20 (PYCL076W)	-0.9524	-1,625 to -0,2799	Yes	****	<0,0001					0:PFUS1 vs. 10-2:PYCL076W	-0.3566	-0,5172 to -0,1960	Yes	****	<0,0001					0:DIX24 (PFUS1) vs. 0.01:DIX20 (PYCL076W)	-0.01433	-0,6319 to 0,6032	No	ns	>0,9999
	0:PFUS1 vs. 10-2:PMFA1	-0.9366	-1,609 to -0,2641	Yes	****	<0,0001															0:DIX24 (PFUS1) vs. 0.01:DIX21 (PIME4)	-0.3232	-0,9957 to 0,3493	No	ns	>0,9999					0:PFUS1 vs. 10-2:PMFA1	-0.2942	-0,4548 to -0,1335	Yes	****	<0,0001					0:DIX24 (PFUS1) vs. 0.01:DIX21 (PIME4)	0.6639	0,04640 to 1,281	Yes	*	0.0148
	0:PFUS1 vs. 10-2:PFIG1	-0.649	-1,321 to 0,02348	No	ns	0.0834															0:DIX24 (PFUS1) vs. 0.01:DIX22 (PHPF1)	0.4154	-0,2571 to 1,088	No	ns	0.9819					0:PFUS1 vs. 10-2:PFIG1	-0.3995	-0,5601 to -0,2388	Yes	****	<0,0001					0:DIX24 (PFUS1) vs. 0.01:DIX22 (PHPF1)	0.07492	-0,5426 to 0,6924	No	ns	>0,9999
	0:PFUS1 vs. 10-2:PAGA2	-0.9949	-1,667 to -0,3224	Yes	****	<0,0001															0:DIX24 (PFUS1) vs. 0.01:DIX23 (PCSS1)	0.2664	-0,4061 to 0,9389	No	ns	>0,9999					0:PFUS1 vs. 10-2:PAGA2	-0.3244	-0,4851 to -0,1638	Yes	****	<0,0001					0:DIX24 (PFUS1) vs. 0.01:DIX23 (PCSS1)	0.8458	0,2282 to 1,463	Yes	****	<0,0001
	0:PFUS1 vs. 10-2:PFUS1	-1.191	-1,641 to -0,7400	Yes	****	<0,0001															0:DIX24 (PFUS1) vs. 0.01:DIX24 (PFUS1)	-1.191	-1,641 to -0,7400	Yes	****	<0,0001					0:PFUS1 vs. 10-2:PFUS1	-0.4095	-0,5171 to -0,3019	Yes	****	<0,0001					0:DIX24 (PFUS1) vs. 0.01:DIX24 (PFUS1)	-0.7811	-1,195 to -0,3673	Yes	****	<0,0001
	0:PFUS1 vs. 10-2:PMFA2	-2.317	-2,989 to -1,644	Yes	****	<0,0001															0:DIX24 (PFUS1) vs. 0.01:DIX25 (PFIG1)	-1.115	-1,788 to -0,4426	Yes	****	<0,0001					0:PFUS1 vs. 10-2:PMFA2	-0.2887	-0,4493 to -0,1280	Yes	****	<0,0001					0:DIX24 (PFUS1) vs. 0.01:DIX25 (PFIG1)	-0.2495	-0,8671 to 0,3680	No	ns	>0,9999
	0:PFUS1 vs. 10-1:Neg.Con.	0.9462	0,1424 to 1,750	Yes	**	0.0023															0:DIX24 (PFUS1) vs. 0.1:DIX14 (Neg.Con.)	0.1045	-0,6992 to 0,9083	No	ns	>0,9999					0:PFUS1 vs. 10-1:Neg.Con.	-0.3962	-0,5882 to -0,2042	Yes	****	<0,0001					0:DIX24 (PFUS1) vs. 0.1:DIX14 (Neg.Con.)	1.342	0,6043 to 2,080	Yes	****	<0,0001
	0:PFUS1 vs. 10-1:PPGK1	-1.381	-2,185 to -0,5773	Yes	****	<0,0001															0:DIX24 (PFUS1) vs. 0.1:DIX27 (PPGK1)	0.1114	-0,6924 to 0,9152	No	ns	>0,9999					0:PFUS1 vs. 10-1:PPGK1	-0.3673	-0,5593 to -0,1753	Yes	****	<0,0001					0:DIX24 (PFUS1) vs. 0.1:DIX27 (PPGK1)	-1.014	-1,752 to -0,2758	Yes	****	<0,0001
	0:PFUS1 vs. 10-1:PTDH3	-2.325	-3,129 to -1,522	Yes	****	<0,0001															0:DIX24 (PFUS1) vs. 0.1:DIX28 (PTDH3)	0.08657	-0,7172 to 0,8904	No	ns	>0,9999					0:PFUS1 vs. 10-1:PTDH3	-0.3962	-0,5881 to -0,2042	Yes	****	<0,0001					0:DIX24 (PFUS1) vs. 0.1:DIX28 (PTDH3)	-1.929	-2,667 to -1,191	Yes	****	<0,0001
	0:PFUS1 vs. 10-1:PCSS1	0.3631	-0,2813 to 1,008	No	ns	0.9978															0:DIX24 (PFUS1) vs. 0.1:DIX17 (PMFA2)	-0.5137	-1,158 to 0,1308	No	ns	0.525					0:PFUS1 vs. 10-1:PCSS1	-0.4805	-0,6344 to -0,3266	Yes	****	<0,0001					0:DIX24 (PFUS1) vs. 0.1:DIX17 (PMFA2)	-2.03	-2,622 to -1,439	Yes	****	<0,0001
	0:PFUS1 vs. 10-1:PIME4	0.1488	-0,4956 to 0,7933	No	ns	>0,9999															0:DIX24 (PFUS1) vs. 0.1:DIX18 (PMFA1)	-0.5284	-1,173 to 0,1161	No	ns	0.4385					0:PFUS1 vs. 10-1:PIME4	-0.5129	-0,6669 to -0,3590	Yes	****	<0,0001					0:DIX24 (PFUS1) vs. 0.1:DIX18 (PMFA1)	-0.6446	-1,236 to -0,05279	Yes	*	0.0116
	0:PFUS1 vs. 10-1:PHPF1	-0.318	-0,9624 to 0,3265	No	ns	>0,9999															0:DIX24 (PFUS1) vs. 0.1:DIX19 (PAGA2)	-0.8256	-1,470 to -0,1812	Yes	***	0.0003					0:PFUS1 vs. 10-1:PHPF1	-0.3908	-0,5447 to -0,2368	Yes	****	<0,0001					0:DIX24 (PFUS1) vs. 0.1:DIX19 (PAGA2)	-0.6726	-1,264 to -0,08086	Yes	**	0.0049
	0:PFUS1 vs. 10-1:PYCL076W	-0.4976	-1,142 to 0,1468	No	ns	0.6214															0:DIX24 (PFUS1) vs. 0.1:DIX20 (PYCL076W)	-1.079	-1,724 to -0,4347	Yes	****	<0,0001					0:PFUS1 vs. 10-1:PYCL076W	-0.4811	-0,6351 to -0,3272	Yes	****	<0,0001					0:DIX24 (PFUS1) vs. 0.1:DIX20 (PYCL076W)	-0.01649	-0,6083 to 0,5753	No	ns	>0,9999
	0:PFUS1 vs. 10-1:PMFA1	-1.063	-1,708 to -0,4188	Yes	****	<0,0001															0:DIX24 (PFUS1) vs. 0.1:DIX21 (PIME4)	-0.4499	-1,094 to 0,1946	No	ns	0.8655					0:PFUS1 vs. 10-1:PMFA1	-0.4187	-0,5726 to -0,2648	Yes	****	<0,0001					0:DIX24 (PFUS1) vs. 0.1:DIX21 (PIME4)	0.6618	0,06999 to 1,254	Yes	**	0.0069
	0:PFUS1 vs. 10-1:PFIG1	-0.7757	-1,420 to -0,1313	Yes	**	0.0014															0:DIX24 (PFUS1) vs. 0.1:DIX22 (PHPF1)	0.2887	-0,3558 to 0,9331	No	ns	>0,9999					0:PFUS1 vs. 10-1:PFIG1	-0.524	-0,6780 to -0,3701	Yes	****	<0,0001					0:DIX24 (PFUS1) vs. 0.1:DIX22 (PHPF1)	0.07277	-0,5190 to 0,6645	No	ns	>0,9999
	0:PFUS1 vs. 10-1:PAGA2	-1.122	-1,766 to -0,4772	Yes	****	<0,0001															0:DIX24 (PFUS1) vs. 0.1:DIX23 (PCSS1)	0.1397	-0,5048 to 0,7841	No	ns	>0,9999					0:PFUS1 vs. 10-1:PAGA2	-0.449	-0,6029 to -0,2951	Yes	****	<0,0001					0:DIX24 (PFUS1) vs. 0.1:DIX23 (PCSS1)	0.8436	0,2518 to 1,435	Yes	****	<0,0001
	0:PFUS1 vs. 10-1:PFUS1	-1.317	-1,725 to -0,9097	Yes	****	<0,0001															0:DIX24 (PFUS1) vs. 0.1:DIX24 (PFUS1)	-1.317	-1,725 to -0,9097	Yes	****	<0,0001					0:PFUS1 vs. 10-1:PFUS1	-0.5341	-0,6314 to -0,4367	Yes	****	<0,0001					0:DIX24 (PFUS1) vs. 0.1:DIX24 (PFUS1)	-0.7832	-1,158 to -0,4090	Yes	****	<0,0001
	0:PFUS1 vs. 10-1:PMFA2	-2.444	-3,088 to -1,799	Yes	****	<0,0001															0:DIX24 (PFUS1) vs. 0.1:DIX25 (PFIG1)	-1.242	-1,886 to -0,5973	Yes	****	<0,0001					0:PFUS1 vs. 10-1:PMFA2	-0.4132	-0,5671 to -0,2593	Yes	****	<0,0001					0:DIX24 (PFUS1) vs. 0.1:DIX25 (PFIG1)	-0.2517	-0,8435 to 0,3401	No	ns	>0,9999
	0:PFUS1 vs. 100:PCSS1	0.2001	-0,4723 to 0,8726	No	ns	>0,9999															0:DIX24 (PFUS1) vs. 1:DIX17 (PMFA2)	-0.6767	-1,349 to -0,004175	Yes	*	0.0455					0:PFUS1 vs. 100:PCSS1	-0.5233	-0,6840 to -0,3627	Yes	****	<0,0001					0:DIX24 (PFUS1) vs. 1:DIX17 (PMFA2)	-2.151	-2,768 to -1,533	Yes	****	<0,0001
	0:PFUS1 vs. 100:PIME4	-0.01413	-0,6866 to 0,6584	No	ns	>0,9999															0:DIX24 (PFUS1) vs. 1:DIX18 (PMFA1)	-0.6914	-1,364 to -0,01888	Yes	*	0.0323					0:PFUS1 vs. 100:PIME4	-0.5558	-0,7164 to -0,3952	Yes	****	<0,0001					0:DIX24 (PFUS1) vs. 1:DIX18 (PMFA1)	-0.7647	-1,382 to -0,1472	Yes	***	0.0007
	0:PFUS1 vs. 100:PHPF1	-0.481	-1,153 to 0,1915	No	ns	0.8192															0:DIX24 (PFUS1) vs. 1:DIX19 (PAGA2)	-0.9886	-1,661 to -0,3161	Yes	****	<0,0001					0:PFUS1 vs. 100:PHPF1	-0.4336	-0,5942 to -0,2730	Yes	****	<0,0001					0:DIX24 (PFUS1) vs. 1:DIX19 (PAGA2)	-0.7928	-1,410 to -0,1752	Yes	***	0.0003
	0:PFUS1 vs. 100:PYCL076W	-0.6606	-1,333 to 0,01189	No	ns	0.0651															0:DIX24 (PFUS1) vs. 1:DIX20 (PYCL076W)	-1.242	-1,915 to -0,5696	Yes	****	<0,0001					0:PFUS1 vs. 100:PYCL076W	-0.524	-0,6846 to -0,3634	Yes	****	<0,0001					0:DIX24 (PFUS1) vs. 1:DIX20 (PYCL076W)	-0.1366	-0,7541 to 0,4809	No	ns	>0,9999
	0:PFUS1 vs. 100:PMFA1	-1.226	-1,899 to -0,5538	Yes	****	<0,0001															0:DIX24 (PFUS1) vs. 1:DIX21 (PIME4)	-0.6128	-1,285 to 0,05964	No	ns	0.1696					0:PFUS1 vs. 100:PMFA1	-0.4616	-0,6222 to -0,3009	Yes	****	<0,0001					0:DIX24 (PFUS1) vs. 1:DIX21 (PIME4)	0.5416	-0,07588 to 1,159	No	ns	0.252
	0:PFUS1 vs. 100:PFIG1	-0.9387	-1,611 to -0,2662	Yes	****	<0,0001															0:DIX24 (PFUS1) vs. 1:DIX22 (PHPF1)	0.1257	-0,5468 to 0,7982	No	ns	>0,9999					0:PFUS1 vs. 100:PFIG1	-0.5669	-0,7275 to -0,4062	Yes	****	<0,0001					0:DIX24 (PFUS1) vs. 1:DIX22 (PHPF1)	-0.04735	-0,6649 to 0,5702	No	ns	>0,9999
	0:PFUS1 vs. 100:PAGA2	-1.285	-1,957 to -0,6121	Yes	****	<0,0001															0:DIX24 (PFUS1) vs. 1:DIX23 (PCSS1)	-0.02329	-0,6958 to 0,6492	No	ns	>0,9999					0:PFUS1 vs. 100:PAGA2	-0.4918	-0,6525 to -0,3312	Yes	****	<0,0001					0:DIX24 (PFUS1) vs. 1:DIX23 (PCSS1)	0.7235	0,1060 to 1,341	Yes	**	0.0025
	0:PFUS1 vs. 100:PFUS1	-1.48	-1,931 to -1,030	Yes	****	<0,0001															0:DIX24 (PFUS1) vs. 1:DIX24 (PFUS1)	-1.48	-1,931 to -1,030	Yes	****	<0,0001					0:PFUS1 vs. 100:PFUS1	-0.5769	-0,6845 to -0,4693	Yes	****	<0,0001					0:DIX24 (PFUS1) vs. 1:DIX24 (PFUS1)	-0.9034	-1,317 to -0,4896	Yes	****	<0,0001
	0:PFUS1 vs. 100:PMFA2	-2.607	-3,279 to -1,934	Yes	****	<0,0001															0:DIX24 (PFUS1) vs. 1:DIX25 (PFIG1)	-1.405	-2,077 to -0,7323	Yes	****	<0,0001					0:PFUS1 vs. 100:PMFA2	-0.4561	-0,6167 to -0,2954	Yes	****	<0,0001					0:DIX24 (PFUS1) vs. 1:DIX25 (PFIG1)	-0.3718	-0,9893 to 0,2457	No	ns	0.9894
	0:PFUS1 vs. 101:PCSS1	0.2606	-0,4118 to 0,9331	No	ns	>0,9999															0:DIX24 (PFUS1) vs. 10:DIX17 (PMFA2)	-0.6162	-1,289 to 0,05633	No	ns	0.1596					0:PFUS1 vs. 101:PCSS1	-0.4491	-0,6097 to -0,2885	Yes	****	<0,0001					0:DIX24 (PFUS1) vs. 10:DIX17 (PMFA2)	-2.164	-2,782 to -1,547	Yes	****	<0,0001
	0:PFUS1 vs. 101:PIME4	0.04637	-0,6261 to 0,7189	No	ns	>0,9999															0:DIX24 (PFUS1) vs. 10:DIX18 (PMFA1)	-0.6309	-1,303 to 0,04162	No	ns	0.1206					0:PFUS1 vs. 101:PIME4	-0.4815	-0,6421 to -0,3209	Yes	****	<0,0001					0:DIX24 (PFUS1) vs. 10:DIX18 (PMFA1)	-0.7785	-1,396 to -0,1609	Yes	***	0.0004
	0:PFUS1 vs. 101:PHPF1	-0.4205	-1,093 to 0,2520	No	ns	0.977															0:DIX24 (PFUS1) vs. 10:DIX19 (PAGA2)	-0.9281	-1,601 to -0,2556	Yes	****	<0,0001					0:PFUS1 vs. 101:PHPF1	-0.3593	-0,5200 to -0,1987	Yes	****	<0,0001					0:DIX24 (PFUS1) vs. 10:DIX19 (PAGA2)	-0.8065	-1,424 to -0,1890	Yes	***	0.0002
	0:PFUS1 vs. 101:PYCL076W	-0.6001	-1,273 to 0,07239	No	ns	0.2124															0:DIX24 (PFUS1) vs. 10:DIX20 (PYCL076W)	-1.182	-1,854 to -0,5091	Yes	****	<0,0001					0:PFUS1 vs. 101:PYCL076W	-0.4497	-0,6104 to -0,2891	Yes	****	<0,0001					0:DIX24 (PFUS1) vs. 10:DIX20 (PYCL076W)	-0.1504	-0,7679 to 0,4672	No	ns	>0,9999
	0:PFUS1 vs. 101:PMFA1	-1.166	-1,838 to -0,4933	Yes	****	<0,0001															0:DIX24 (PFUS1) vs. 10:DIX21 (PIME4)	-0.5523	-1,225 to 0,1201	No	ns	0.4332					0:PFUS1 vs. 101:PMFA1	-0.3873	-0,5479 to -0,2267	Yes	****	<0,0001					0:DIX24 (PFUS1) vs. 10:DIX21 (PIME4)	0.5279	-0,08964 to 1,145	No	ns	0.3179
	0:PFUS1 vs. 101:PFIG1	-0.8782	-1,551 to -0,2057	Yes	***	0.0002															0:DIX24 (PFUS1) vs. 10:DIX22 (PHPF1)	0.1862	-0,4863 to 0,8587	No	ns	>0,9999					0:PFUS1 vs. 101:PFIG1	-0.4926	-0,6532 to -0,3320	Yes	****	<0,0001					0:DIX24 (PFUS1) vs. 10:DIX22 (PHPF1)	-0.06111	-0,6786 to 0,5564	No	ns	>0,9999
	0:PFUS1 vs. 101:PAGA2	-1.224	-1,897 to -0,5516	Yes	****	<0,0001															0:DIX24 (PFUS1) vs. 10:DIX23 (PCSS1)	0.03721	-0,6353 to 0,7097	No	ns	>0,9999					0:PFUS1 vs. 101:PAGA2	-0.4176	-0,5782 to -0,2570	Yes	****	<0,0001					0:DIX24 (PFUS1) vs. 10:DIX23 (PCSS1)	0.7097	0,09221 to 1,327	Yes	**	0.0039
	0:PFUS1 vs. 101:PFUS1	-1.42	-1,870 to -0,9692	Yes	****	<0,0001															0:DIX24 (PFUS1) vs. 10:DIX24 (PFUS1)	-1.42	-1,870 to -0,9692	Yes	****	<0,0001					0:PFUS1 vs. 101:PFUS1	-0.5027	-0,6103 to -0,3950	Yes	****	<0,0001					0:DIX24 (PFUS1) vs. 10:DIX24 (PFUS1)	-0.9171	-1,331 to -0,5033	Yes	****	<0,0001
	0:PFUS1 vs. 101:PMFA2	-2.546	-3,219 to -1,874	Yes	****	<0,0001															0:DIX24 (PFUS1) vs. 10:DIX25 (PFIG1)	-1.344	-2,017 to -0,6718	Yes	****	<0,0001					0:PFUS1 vs. 101:PMFA2	-0.3818	-0,5424 to -0,2212	Yes	****	<0,0001					0:DIX24 (PFUS1) vs. 10:DIX25 (PFIG1)	-0.3856	-1,003 to 0,2319	No	ns	0.9776
	0:PFUS1 vs. 102:Neg.Con.	0.9082	0,1045 to 1,712	Yes	**	0.0056															0:DIX24 (PFUS1) vs. 100:DIX14 (Neg.Con.)	0.06661	-0,7372 to 0,8704	No	ns	>0,9999					0:PFUS1 vs. 102:Neg.Con.	-0.3831	-0,5751 to -0,1912	Yes	****	<0,0001					0:DIX24 (PFUS1) vs. 100:DIX14 (Neg.Con.)	1.291	0,5533 to 2,029	Yes	****	<0,0001
	0:PFUS1 vs. 102:PPGK1	-1.419	-2,223 to -0,6152	Yes	****	<0,0001															0:DIX24 (PFUS1) vs. 100:DIX27 (PPGK1)	0.0735	-0,7303 to 0,8773	No	ns	>0,9999					0:PFUS1 vs. 102:PPGK1	-0.3542	-0,5462 to -0,1622	Yes	****	<0,0001					0:DIX24 (PFUS1) vs. 100:DIX27 (PPGK1)	-1.065	-1,803 to -0,3267	Yes	****	<0,0001
	0:PFUS1 vs. 102:PTDH3	-2.363	-3,167 to -1,560	Yes	****	<0,0001															0:DIX24 (PFUS1) vs. 100:DIX28 (PTDH3)	0.04865	-0,7551 to 0,8524	No	ns	>0,9999					0:PFUS1 vs. 102:PTDH3	-0.3831	-0,5751 to -0,1911	Yes	****	<0,0001					0:DIX24 (PFUS1) vs. 100:DIX28 (PTDH3)	-1.98	-2,718 to -1,242	Yes	****	<0,0001
	0:PFUS1 vs. 102:PCSS1	0.3252	-0,3193 to 0,9697	No	ns	>0,9999															0:DIX24 (PFUS1) vs. 100:DIX17 (PMFA2)	-0.5516	-1,196 to 0,09285	No	ns	0.3145					0:PFUS1 vs. 102:PCSS1	-0.4674	-0,6214 to -0,3135	Yes	****	<0,0001					0:DIX24 (PFUS1) vs. 100:DIX17 (PMFA2)	-2.081	-2,673 to -1,490	Yes	****	<0,0001
	0:PFUS1 vs. 102:PIME4	0.1109	-0,5335 to 0,7554	No	ns	>0,9999															0:DIX24 (PFUS1) vs. 100:DIX18 (PMFA1)	-0.5663	-1,211 to 0,07814	No	ns	0.2475					0:PFUS1 vs. 102:PIME4	-0.4999	-0,6538 to -0,3459	Yes	****	<0,0001					0:DIX24 (PFUS1) vs. 100:DIX18 (PMFA1)	-0.6956	-1,287 to -0,1038	Yes	**	0.0024
	0:PFUS1 vs. 102:PHPF1	-0.3559	-1,000 to 0,2886	No	ns	0.9987															0:DIX24 (PFUS1) vs. 100:DIX19 (PAGA2)	-0.8635	-1,508 to -0,2191	Yes	****	<0,0001					0:PFUS1 vs. 102:PHPF1	-0.3777	-0,5316 to -0,2238	Yes	****	<0,0001					0:DIX24 (PFUS1) vs. 100:DIX19 (PAGA2)	-0.7236	-1,315 to -0,1318	Yes	***	0.0009
	0:PFUS1 vs. 102:PYCL076W	-0.5355	-1,180 to 0,1089	No	ns	0.3983															0:DIX24 (PFUS1) vs. 100:DIX20 (PYCL076W)	-1.117	-1,762 to -0,4726	Yes	****	<0,0001					0:PFUS1 vs. 102:PYCL076W	-0.4681	-0,6220 to -0,3141	Yes	****	<0,0001					0:DIX24 (PFUS1) vs. 100:DIX20 (PYCL076W)	-0.06747	-0,6593 to 0,5243	No	ns	>0,9999
	0:PFUS1 vs. 102:PMFA1	-1.101	-1,746 to -0,4567	Yes	****	<0,0001															0:DIX24 (PFUS1) vs. 100:DIX21 (PIME4)	-0.4878	-1,132 to 0,1567	No	ns	0.6791					0:PFUS1 vs. 102:PMFA1	-0.4056	-0,5596 to -0,2517	Yes	****	<0,0001					0:DIX24 (PFUS1) vs. 100:DIX21 (PIME4)	0.6108	0,01900 to 1,203	Yes	*	0.0303
	0:PFUS1 vs. 102:PFIG1	-0.8136	-1,458 to -0,1692	Yes	***	0.0004															0:DIX24 (PFUS1) vs. 100:DIX22 (PHPF1)	0.2508	-0,3937 to 0,8952	No	ns	>0,9999					0:PFUS1 vs. 102:PFIG1	-0.511	-0,6649 to -0,3570	Yes	****	<0,0001					0:DIX24 (PFUS1) vs. 100:DIX22 (PHPF1)	0.02178	-0,5700 to 0,6136	No	ns	>0,9999
	0:PFUS1 vs. 102:PAGA2	-1.16	-1,804 to -0,5151	Yes	****	<0,0001															0:DIX24 (PFUS1) vs. 100:DIX23 (PCSS1)	0.1018	-0,5427 to 0,7462	No	ns	>0,9999					0:PFUS1 vs. 102:PAGA2	-0.4359	-0,5899 to -0,2820	Yes	****	<0,0001					0:DIX24 (PFUS1) vs. 100:DIX23 (PCSS1)	0.7926	0,2008 to 1,384	Yes	****	<0,0001
	0:PFUS1 vs. 102:PFUS1	-1.355	-1,763 to -0,9476	Yes	****	<0,0001															0:DIX24 (PFUS1) vs. 100:DIX24 (PFUS1)	-1.355	-1,763 to -0,9476	Yes	****	<0,0001					0:PFUS1 vs. 102:PFUS1	-0.521	-0,6183 to -0,4236	Yes	****	<0,0001					0:DIX24 (PFUS1) vs. 100:DIX24 (PFUS1)	-0.8342	-1,208 to -0,4600	Yes	****	<0,0001
	0:PFUS1 vs. 102:PMFA2	-2.482	-3,126 to -1,837	Yes	****	<0,0001															0:DIX24 (PFUS1) vs. 100:DIX25 (PFIG1)	-1.28	-1,924 to -0,6353	Yes	****	<0,0001					0:PFUS1 vs. 102:PMFA2	-0.4001	-0,5541 to -0,2462	Yes	****	<0,0001					0:DIX24 (PFUS1) vs. 100:DIX25 (PFIG1)	-0.3027	-0,8945 to 0,2891	No	ns	0.9999
	0:PMFA2 vs. 10-4:PCSS1	2.889	2,217 to 3,562	Yes	****	<0,0001															0:DIX25 (PFIG1) vs. 0.0001:DIX17 (PMFA2)	0.8105	0,1380 to 1,483	Yes	**	0.0013					0:PMFA2 vs. 10-4:PCSS1	-0.04293	-0,2036 to 0,1177	No	ns	>0,9999					0:DIX25 (PFIG1) vs. 0.0001:DIX17 (PMFA2)	-1.721	-2,338 to -1,103	Yes	****	<0,0001
	0:PMFA2 vs. 10-4:PIME4	2.675	2,002 to 3,347	Yes	****	<0,0001															0:DIX25 (PFIG1) vs. 0.0001:DIX18 (PMFA1)	0.7958	0,1233 to 1,468	Yes	**	0.002					0:PMFA2 vs. 10-4:PIME4	-0.07536	-0,2360 to 0,08526	No	ns	>0,9999					0:DIX25 (PFIG1) vs. 0.0001:DIX18 (PMFA1)	-0.3348	-0,9523 to 0,2827	No	ns	0.9992
	0:PMFA2 vs. 10-4:PHPF1	2.208	1,536 to 2,881	Yes	****	<0,0001															0:DIX25 (PFIG1) vs. 0.0001:DIX19 (PAGA2)	0.4986	-0,1739 to 1,171	No	ns	0.7348					0:PMFA2 vs. 10-4:PHPF1	0.04681	-0,1138 to 0,2074	No	ns	>0,9999					0:DIX25 (PFIG1) vs. 0.0001:DIX19 (PAGA2)	-0.3629	-0,9804 to 0,2546	No	ns	0.9939
	0:PMFA2 vs. 10-4:PYCL076W	2.028	1,356 to 2,701	Yes	****	<0,0001															0:DIX25 (PFIG1) vs. 0.0001:DIX20 (PYCL076W)	0.2451	-0,4274 to 0,9176	No	ns	>0,9999					0:PMFA2 vs. 10-4:PYCL076W	-0.04358	-0,2042 to 0,1171	No	ns	>0,9999					0:DIX25 (PFIG1) vs. 0.0001:DIX20 (PYCL076W)	0.2933	-0,3242 to 0,9108	No	ns	>0,9999
	0:PMFA2 vs. 10-4:PMFA1	1.463	0,7903 to 2,135	Yes	****	<0,0001															0:DIX25 (PFIG1) vs. 0.0001:DIX21 (PIME4)	0.8744	0,2019 to 1,547	Yes	***	0.0002					0:PMFA2 vs. 10-4:PMFA1	0.01885	-0,1418 to 0,1795	No	ns	>0,9999					0:DIX25 (PFIG1) vs. 0.0001:DIX21 (PIME4)	0.9715	0,3540 to 1,589	Yes	****	<0,0001
	0:PMFA2 vs. 10-4:PFIG1	1.75	1,078 to 2,423	Yes	****	<0,0001															0:DIX25 (PFIG1) vs. 0.0001:DIX22 (PHPF1)	1.613	0,9404 to 2,285	Yes	****	<0,0001					0:PMFA2 vs. 10-4:PFIG1	-0.08646	-0,2471 to 0,07417	No	ns	0.9994					0:DIX25 (PFIG1) vs. 0.0001:DIX22 (PHPF1)	0.3825	-0,2350 to 1,000	No	ns	0.9808
	0:PMFA2 vs. 10-4:PAGA2	1.404	0,7320 to 2,077	Yes	****	<0,0001															0:DIX25 (PFIG1) vs. 0.0001:DIX23 (PCSS1)	1.464	0,7914 to 2,136	Yes	****	<0,0001					0:PMFA2 vs. 10-4:PAGA2	-0.01143	-0,1721 to 0,1492	No	ns	>0,9999					0:DIX25 (PFIG1) vs. 0.0001:DIX23 (PCSS1)	1.153	0,5359 to 1,771	Yes	****	<0,0001
	0:PMFA2 vs. 10-4:PFUS1	1.209	0,5363 to 1,881	Yes	****	<0,0001															0:DIX25 (PFIG1) vs. 0.0001:DIX24 (PFUS1)	0.006927	-0,6656 to 0,6794	No	ns	>0,9999					0:PMFA2 vs. 10-4:PFUS1	-0.0965	-0,2571 to 0,06413	No	ns	0.9899					0:DIX25 (PFIG1) vs. 0.0001:DIX24 (PFUS1)	-0.4735	-1,091 to 0,1440	No	ns	0.6421
	0:PMFA2 vs. 10-4:PMFA2	0.08242	-0,3682 to 0,5330	No	ns	>0,9999															0:DIX25 (PFIG1) vs. 0.0001:DIX25 (PFIG1)	0.08242	-0,3682 to 0,5330	No	ns	>0,9999					0:PMFA2 vs. 10-4:PMFA2	0.02435	-0,08328 to 0,1320	No	ns	>0,9999					0:DIX25 (PFIG1) vs. 0.0001:DIX25 (PFIG1)	0.05807	-0,3557 to 0,4718	No	ns	>0,9999
	0:PMFA2 vs. 10-3:PCSS1	2.304	1,631 to 2,976	Yes	****	<0,0001															0:DIX25 (PFIG1) vs. 0.001:DIX17 (PMFA2)	0.2253	-0,4472 to 0,8977	No	ns	>0,9999					0:PMFA2 vs. 10-3:PCSS1	-0.1698	-0,3304 to -0,009136	Yes	*	0.0201					0:DIX25 (PFIG1) vs. 0.001:DIX17 (PMFA2)	-2.179	-2,797 to -1,562	Yes	****	<0,0001
	0:PMFA2 vs. 10-3:PIME4	2.09	1,417 to 2,762	Yes	****	<0,0001															0:DIX25 (PFIG1) vs. 0.001:DIX18 (PMFA1)	0.2106	-0,4619 to 0,8830	No	ns	>0,9999					0:PMFA2 vs. 10-3:PIME4	-0.2022	-0,3628 to -0,04156	Yes	***	0.0004					0:DIX25 (PFIG1) vs. 0.001:DIX18 (PMFA1)	-0.7933	-1,411 to -0,1757	Yes	***	0.0003
	0:PMFA2 vs. 10-3:PHPF1	1.623	0,9503 to 2,295	Yes	****	<0,0001															0:DIX25 (PFIG1) vs. 0.001:DIX19 (PAGA2)	-0.08667	-0,7592 to 0,5858	No	ns	>0,9999					0:PMFA2 vs. 10-3:PHPF1	-0.08002	-0,2406 to 0,08061	No	ns	>0,9999					0:DIX25 (PFIG1) vs. 0.001:DIX19 (PAGA2)	-0.8213	-1,439 to -0,2038	Yes	****	<0,0001
	0:PMFA2 vs. 10-3:PYCL076W	1.443	0,7707 to 2,116	Yes	****	<0,0001															0:DIX25 (PFIG1) vs. 0.001:DIX20 (PYCL076W)	-0.3402	-1,013 to 0,3323	No	ns	>0,9999					0:PMFA2 vs. 10-3:PYCL076W	-0.1704	-0,3310 to -0,009779	Yes	*	0.0188					0:DIX25 (PFIG1) vs. 0.001:DIX20 (PYCL076W)	-0.1652	-0,7827 to 0,4523	No	ns	>0,9999
	0:PMFA2 vs. 10-3:PMFA1	0.8775	0,2050 to 1,550	Yes	***	0.0002															0:DIX25 (PFIG1) vs. 0.001:DIX21 (PIME4)	0.2891	-0,3834 to 0,9616	No	ns	>0,9999					0:PMFA2 vs. 10-3:PMFA1	-0.108	-0,2686 to 0,05265	No	ns	0.9204					0:DIX25 (PFIG1) vs. 0.001:DIX21 (PIME4)	0.5131	-0,1044 to 1,131	No	ns	0.3987
	0:PMFA2 vs. 10-3:PFIG1	1.165	0,4926 to 1,838	Yes	****	<0,0001															0:DIX25 (PFIG1) vs. 0.001:DIX22 (PHPF1)	1.028	0,3551 to 1,700	Yes	****	<0,0001					0:PMFA2 vs. 10-3:PFIG1	-0.2133	-0,3739 to -0,05266	Yes	***	0.0001					0:DIX25 (PFIG1) vs. 0.001:DIX22 (PHPF1)	-0.07592	-0,6934 to 0,5416	No	ns	>0,9999
	0:PMFA2 vs. 10-3:PAGA2	0.8192	0,1467 to 1,492	Yes	**	0.001															0:DIX25 (PFIG1) vs. 0.001:DIX23 (PCSS1)	0.8786	0,2061 to 1,551	Yes	***	0.0002					0:PMFA2 vs. 10-3:PAGA2	-0.1383	-0,2989 to 0,02237	No	ns	0.2995					0:DIX25 (PFIG1) vs. 0.001:DIX23 (PCSS1)	0.6949	0,07740 to 1,312	Yes	**	0.0061
	0:PMFA2 vs. 10-3:PFUS1	0.6235	-0,04897 to 1,296	No	ns	0.139															0:DIX25 (PFIG1) vs. 0.001:DIX24 (PFUS1)	-0.5783	-1,251 to 0,09414	No	ns	0.3018					0:PMFA2 vs. 10-3:PFUS1	-0.2233	-0,3839 to -0,06270	Yes	****	<0,0001					0:DIX25 (PFIG1) vs. 0.001:DIX24 (PFUS1)	-0.9319	-1,549 to -0,3144	Yes	****	<0,0001
	0:PMFA2 vs. 10-3:PMFA2	-0.5029	-0,9535 to -0,05224	Yes	**	0.0072															0:DIX25 (PFIG1) vs. 0.001:DIX25 (PFIG1)	-0.5029	-0,9535 to -0,05224	Yes	**	0.0072					0:PMFA2 vs. 10-3:PMFA2	-0.1025	-0,2101 to 0,005151	No	ns	0.0998					0:DIX25 (PFIG1) vs. 0.001:DIX25 (PFIG1)	-0.4004	-0,8142 to 0,01340	No	ns	0.0805
	0:PMFA2 vs. 10-2:PCSS1	1.616	0,9437 to 2,289	Yes	****	<0,0001															0:DIX25 (PFIG1) vs. 0.01:DIX17 (PMFA2)	-0.4625	-1,135 to 0,2100	No	ns	0.8897					0:PMFA2 vs. 10-2:PCSS1	-0.4768	-0,6374 to -0,3162	Yes	****	<0,0001					0:DIX25 (PFIG1) vs. 0.01:DIX17 (PMFA2)	-2.56	-3,177 to -1,942	Yes	****	<0,0001
	0:PMFA2 vs. 10-2:PIME4	1.402	0,7294 to 2,074	Yes	****	<0,0001															0:DIX25 (PFIG1) vs. 0.01:DIX18 (PMFA1)	-0.4772	-1,150 to 0,1953	No	ns	0.8352					0:PMFA2 vs. 10-2:PIME4	-0.5092	-0,6698 to -0,3486	Yes	****	<0,0001					0:DIX25 (PFIG1) vs. 0.01:DIX18 (PMFA1)	-1.174	-1,791 to -0,5564	Yes	****	<0,0001
	0:PMFA2 vs. 10-2:PHPF1	0.9351	0,2626 to 1,608	Yes	****	<0,0001															0:DIX25 (PFIG1) vs. 0.01:DIX19 (PAGA2)	-0.7744	-1,447 to -0,1019	Yes	**	0.0037					0:PMFA2 vs. 10-2:PHPF1	-0.3871	-0,5477 to -0,2264	Yes	****	<0,0001					0:DIX25 (PFIG1) vs. 0.01:DIX19 (PAGA2)	-1.202	-1,820 to -0,5845	Yes	****	<0,0001
	0:PMFA2 vs. 10-2:PYCL076W	0.7555	0,08296 to 1,428	Yes	**	0.0063															0:DIX25 (PFIG1) vs. 0.01:DIX20 (PYCL076W)	-1.028	-1,700 to -0,3554	Yes	****	<0,0001					0:PMFA2 vs. 10-2:PYCL076W	-0.4774	-0,6381 to -0,3168	Yes	****	<0,0001					0:DIX25 (PFIG1) vs. 0.01:DIX20 (PYCL076W)	-0.5459	-1,163 to 0,07164	No	ns	0.2336
	0:PMFA2 vs. 10-2:PMFA1	0.1898	-0,4827 to 0,8623	No	ns	>0,9999															0:DIX25 (PFIG1) vs. 0.01:DIX21 (PIME4)	-0.3987	-1,071 to 0,2738	No	ns	0.9925					0:PMFA2 vs. 10-2:PMFA1	-0.415	-0,5756 to -0,2544	Yes	****	<0,0001					0:DIX25 (PFIG1) vs. 0.01:DIX21 (PIME4)	0.1324	-0,4851 to 0,7499	No	ns	>0,9999
	0:PMFA2 vs. 10-2:PFIG1	0.4774	-0,1951 to 1,150	No	ns	0.8345															0:DIX25 (PFIG1) vs. 0.01:DIX22 (PHPF1)	0.3399	-0,3326 to 1,012	No	ns	>0,9999					0:PMFA2 vs. 10-2:PFIG1	-0.5203	-0,6809 to -0,3597	Yes	****	<0,0001					0:DIX25 (PFIG1) vs. 0.01:DIX22 (PHPF1)	-0.4566	-1,074 to 0,1609	No	ns	0.7417
	0:PMFA2 vs. 10-2:PAGA2	0.1315	-0,5410 to 0,8039	No	ns	>0,9999															0:DIX25 (PFIG1) vs. 0.01:DIX23 (PCSS1)	0.1909	-0,4816 to 0,8634	No	ns	>0,9999					0:PMFA2 vs. 10-2:PAGA2	-0.4453	-0,6059 to -0,2847	Yes	****	<0,0001					0:DIX25 (PFIG1) vs. 0.01:DIX23 (PCSS1)	0.3142	-0,3033 to 0,9317	No	ns	0.9999
	0:PMFA2 vs. 10-2:PFUS1	-0.06422	-0,7367 to 0,6083	No	ns	>0,9999															0:DIX25 (PFIG1) vs. 0.01:DIX24 (PFUS1)	-1.266	-1,939 to -0,5936	Yes	****	<0,0001					0:PMFA2 vs. 10-2:PFUS1	-0.5304	-0,6910 to -0,3697	Yes	****	<0,0001					0:DIX25 (PFIG1) vs. 0.01:DIX24 (PFUS1)	-1.313	-1,930 to -0,6951	Yes	****	<0,0001
	0:PMFA2 vs. 10-2:PMFA2	-1.191	-1,641 to -0,7400	Yes	****	<0,0001															0:DIX25 (PFIG1) vs. 0.01:DIX25 (PFIG1)	-1.191	-1,641 to -0,7400	Yes	****	<0,0001					0:PMFA2 vs. 10-2:PMFA2	-0.4095	-0,5171 to -0,3019	Yes	****	<0,0001					0:DIX25 (PFIG1) vs. 0.01:DIX25 (PFIG1)	-0.7811	-1,195 to -0,3673	Yes	****	<0,0001
	0:PMFA2 vs. 10-1:Neg.Con.	2.073	1,269 to 2,876	Yes	****	<0,0001															0:DIX25 (PFIG1) vs. 0.1:DIX14 (Neg.Con.)	0.02903	-0,7747 to 0,8328	No	ns	>0,9999					0:PMFA2 vs. 10-1:Neg.Con.	-0.517	-0,7090 to -0,3251	Yes	****	<0,0001					0:DIX25 (PFIG1) vs. 0.1:DIX14 (Neg.Con.)	0.8108	0,07273 to 1,549	Yes	**	0.0098
	0:PMFA2 vs. 10-1:PPGK1	-0.2547	-1,059 to 0,5490	No	ns	>0,9999															0:DIX25 (PFIG1) vs. 0.1:DIX27 (PPGK1)	0.03592	-0,7679 to 0,8397	No	ns	>0,9999					0:PMFA2 vs. 10-1:PPGK1	-0.4881	-0,6801 to -0,2961	Yes	****	<0,0001					0:DIX25 (PFIG1) vs. 0.1:DIX27 (PPGK1)	-1.545	-2,283 to -0,8073	Yes	****	<0,0001
	0:PMFA2 vs. 10-1:PTDH3	-1.199	-2,003 to -0,3953	Yes	****	<0,0001															0:DIX25 (PFIG1) vs. 0.1:DIX28 (PTDH3)	0.01108	-0,7927 to 0,8149	No	ns	>0,9999					0:PMFA2 vs. 10-1:PTDH3	-0.517	-0,7090 to -0,3250	Yes	****	<0,0001					0:DIX25 (PFIG1) vs. 0.1:DIX28 (PTDH3)	-2.461	-3,199 to -1,723	Yes	****	<0,0001
	0:PMFA2 vs. 10-1:PCSS1	1.489	0,8450 to 2,134	Yes	****	<0,0001															0:DIX25 (PFIG1) vs. 0.1:DIX17 (PMFA2)	-0.5892	-1,234 to 0,05527	No	ns	0.1636					0:PMFA2 vs. 10-1:PCSS1	-0.6013	-0,7553 to -0,4474	Yes	****	<0,0001					0:DIX25 (PFIG1) vs. 0.1:DIX17 (PMFA2)	-2.562	-3,154 to -1,970	Yes	****	<0,0001
	0:PMFA2 vs. 10-1:PIME4	1.275	0,6308 to 1,920	Yes	****	<0,0001															0:DIX25 (PFIG1) vs. 0.1:DIX18 (PMFA1)	-0.6039	-1,248 to 0,04057	No	ns	0.1223					0:PMFA2 vs. 10-1:PIME4	-0.6338	-0,7877 to -0,4798	Yes	****	<0,0001					0:DIX25 (PFIG1) vs. 0.1:DIX18 (PMFA1)	-1.176	-1,768 to -0,5843	Yes	****	<0,0001
	0:PMFA2 vs. 10-1:PHPF1	0.8084	0,1639 to 1,453	Yes	***	0.0005															0:DIX25 (PFIG1) vs. 0.1:DIX19 (PAGA2)	-0.9011	-1,546 to -0,2567	Yes	****	<0,0001					0:PMFA2 vs. 10-1:PHPF1	-0.5116	-0,6655 to -0,3577	Yes	****	<0,0001					0:DIX25 (PFIG1) vs. 0.1:DIX19 (PAGA2)	-1.204	-1,796 to -0,6124	Yes	****	<0,0001
	0:PMFA2 vs. 10-1:PYCL076W	0.6288	-0,01571 to 1,273	No	ns	0.0717															0:DIX25 (PFIG1) vs. 0.1:DIX20 (PYCL076W)	-1.155	-1,799 to -0,5102	Yes	****	<0,0001					0:PMFA2 vs. 10-1:PYCL076W	-0.602	-0,7559 to -0,4481	Yes	****	<0,0001					0:DIX25 (PFIG1) vs. 0.1:DIX20 (PYCL076W)	-0.548	-1,140 to 0,04374	No	ns	0.141
	0:PMFA2 vs. 10-1:PMFA1	0.0631	-0,5814 to 0,7076	No	ns	>0,9999															0:DIX25 (PFIG1) vs. 0.1:DIX21 (PIME4)	-0.5254	-1,170 to 0,1191	No	ns	0.4559					0:PMFA2 vs. 10-1:PMFA1	-0.5396	-0,6935 to -0,3856	Yes	****	<0,0001					0:DIX25 (PFIG1) vs. 0.1:DIX21 (PIME4)	0.1302	-0,4616 to 0,7220	No	ns	>0,9999
	0:PMFA2 vs. 10-1:PFIG1	0.3507	-0,2938 to 0,9951	No	ns	0.9992															0:DIX25 (PFIG1) vs. 0.1:DIX22 (PHPF1)	0.2132	-0,4313 to 0,8576	No	ns	>0,9999					0:PMFA2 vs. 10-1:PFIG1	-0.6449	-0,7988 to -0,4909	Yes	****	<0,0001					0:DIX25 (PFIG1) vs. 0.1:DIX22 (PHPF1)	-0.4588	-1,051 to 0,1330	No	ns	0.6095
	0:PMFA2 vs. 10-1:PAGA2	0.004749	-0,6397 to 0,6492	No	ns	>0,9999															0:DIX25 (PFIG1) vs. 0.1:DIX23 (PCSS1)	0.06419	-0,5803 to 0,7086	No	ns	>0,9999					0:PMFA2 vs. 10-1:PAGA2	-0.5698	-0,7238 to -0,4159	Yes	****	<0,0001					0:DIX25 (PFIG1) vs. 0.1:DIX23 (PCSS1)	0.3121	-0,2797 to 0,9038	No	ns	0.9997
	0:PMFA2 vs. 10-1:PFUS1	-0.1909	-0,8354 to 0,4535	No	ns	>0,9999															0:DIX25 (PFIG1) vs. 0.1:DIX24 (PFUS1)	-1.393	-2,037 to -0,7483	Yes	****	<0,0001					0:PMFA2 vs. 10-1:PFUS1	-0.6549	-0,8088 to -0,5010	Yes	****	<0,0001					0:DIX25 (PFIG1) vs. 0.1:DIX24 (PFUS1)	-1.315	-1,907 to -0,7230	Yes	****	<0,0001
	0:PMFA2 vs. 10-1:PMFA2	-1.317	-1,725 to -0,9097	Yes	****	<0,0001															0:DIX25 (PFIG1) vs. 0.1:DIX25 (PFIG1)	-1.317	-1,725 to -0,9097	Yes	****	<0,0001					0:PMFA2 vs. 10-1:PMFA2	-0.5341	-0,6314 to -0,4367	Yes	****	<0,0001					0:DIX25 (PFIG1) vs. 0.1:DIX25 (PFIG1)	-0.7832	-1,158 to -0,4090	Yes	****	<0,0001
	0:PMFA2 vs. 100:PCSS1	1.327	0,6540 to 1,999	Yes	****	<0,0001															0:DIX25 (PFIG1) vs. 1:DIX17 (PMFA2)	-0.7522	-1,425 to -0,07967	Yes	**	0.0069					0:PMFA2 vs. 100:PCSS1	-0.6442	-0,8048 to -0,4836	Yes	****	<0,0001					0:DIX25 (PFIG1) vs. 1:DIX17 (PMFA2)	-2.682	-3,300 to -2,065	Yes	****	<0,0001
	0:PMFA2 vs. 100:PIME4	1.112	0,4398 to 1,785	Yes	****	<0,0001															0:DIX25 (PFIG1) vs. 1:DIX18 (PMFA1)	-0.7669	-1,439 to -0,09438	Yes	**	0.0046					0:PMFA2 vs. 100:PIME4	-0.6766	-0,8372 to -0,5160	Yes	****	<0,0001					0:DIX25 (PFIG1) vs. 1:DIX18 (PMFA1)	-1.296	-1,914 to -0,6787	Yes	****	<0,0001
	0:PMFA2 vs. 100:PHPF1	0.6454	-0,02707 to 1,318	No	ns	0.0899															0:DIX25 (PFIG1) vs. 1:DIX19 (PAGA2)	-1.064	-1,737 to -0,3916	Yes	****	<0,0001					0:PMFA2 vs. 100:PHPF1	-0.5545	-0,7151 to -0,3938	Yes	****	<0,0001					0:DIX25 (PFIG1) vs. 1:DIX19 (PAGA2)	-1.324	-1,942 to -0,7068	Yes	****	<0,0001
	0:PMFA2 vs. 100:PYCL076W	0.4658	-0,2067 to 1,138	No	ns	0.8786															0:DIX25 (PFIG1) vs. 1:DIX20 (PYCL076W)	-1.318	-1,990 to -0,6451	Yes	****	<0,0001					0:PMFA2 vs. 100:PYCL076W	-0.6448	-0,8055 to -0,4842	Yes	****	<0,0001					0:DIX25 (PFIG1) vs. 1:DIX20 (PYCL076W)	-0.6682	-1,286 to -0,05064	Yes	*	0.0131
	0:PMFA2 vs. 100:PMFA1	-0.09988	-0,7724 to 0,5726	No	ns	>0,9999															0:DIX25 (PFIG1) vs. 1:DIX21 (PIME4)	-0.6883	-1,361 to -0,01585	Yes	*	0.0347					0:PMFA2 vs. 100:PMFA1	-0.5824	-0,7430 to -0,4218	Yes	****	<0,0001					0:DIX25 (PFIG1) vs. 1:DIX21 (PIME4)	0.01009	-0,6074 to 0,6276	No	ns	>0,9999
	0:PMFA2 vs. 100:PFIG1	0.1877	-0,4848 to 0,8602	No	ns	>0,9999															0:DIX25 (PFIG1) vs. 1:DIX22 (PHPF1)	0.0502	-0,6223 to 0,7227	No	ns	>0,9999					0:PMFA2 vs. 100:PFIG1	-0.6877	-0,8483 to -0,5271	Yes	****	<0,0001					0:DIX25 (PFIG1) vs. 1:DIX22 (PHPF1)	-0.5789	-1,196 to 0,03862	No	ns	0.1216
	0:PMFA2 vs. 100:PAGA2	-0.1582	-0,8307 to 0,5143	No	ns	>0,9999															0:DIX25 (PFIG1) vs. 1:DIX23 (PCSS1)	-0.09879	-0,7713 to 0,5737	No	ns	>0,9999					0:PMFA2 vs. 100:PAGA2	-0.6127	-0,7733 to -0,4521	Yes	****	<0,0001					0:DIX25 (PFIG1) vs. 1:DIX23 (PCSS1)	0.1919	-0,4256 to 0,8095	No	ns	>0,9999
	0:PMFA2 vs. 100:PFUS1	-0.3539	-1,026 to 0,3186	No	ns	0.9997															0:DIX25 (PFIG1) vs. 1:DIX24 (PFUS1)	-1.556	-2,228 to -0,8833	Yes	****	<0,0001					0:PMFA2 vs. 100:PFUS1	-0.6978	-0,8584 to -0,5371	Yes	****	<0,0001					0:DIX25 (PFIG1) vs. 1:DIX24 (PFUS1)	-1.435	-2,052 to -0,8174	Yes	****	<0,0001
	0:PMFA2 vs. 100:PMFA2	-1.48	-1,931 to -1,030	Yes	****	<0,0001															0:DIX25 (PFIG1) vs. 1:DIX25 (PFIG1)	-1.48	-1,931 to -1,030	Yes	****	<0,0001					0:PMFA2 vs. 100:PMFA2	-0.5769	-0,6845 to -0,4693	Yes	****	<0,0001					0:DIX25 (PFIG1) vs. 1:DIX25 (PFIG1)	-0.9034	-1,317 to -0,4896	Yes	****	<0,0001
	0:PMFA2 vs. 101:PCSS1	1.387	0,7145 to 2,060	Yes	****	<0,0001															0:DIX25 (PFIG1) vs. 10:DIX17 (PMFA2)	-0.6917	-1,364 to -0,01917	Yes	*	0.0321					0:PMFA2 vs. 101:PCSS1	-0.5699	-0,7306 to -0,4093	Yes	****	<0,0001					0:DIX25 (PFIG1) vs. 10:DIX17 (PMFA2)	-2.696	-3,313 to -2,078	Yes	****	<0,0001
	0:PMFA2 vs. 101:PIME4	1.173	0,5003 to 1,845	Yes	****	<0,0001															0:DIX25 (PFIG1) vs. 10:DIX18 (PMFA1)	-0.7064	-1,379 to -0,03388	Yes	*	0.0225					0:PMFA2 vs. 101:PIME4	-0.6024	-0,7630 to -0,4417	Yes	****	<0,0001					0:DIX25 (PFIG1) vs. 10:DIX18 (PMFA1)	-1.31	-1,928 to -0,6925	Yes	****	<0,0001
	0:PMFA2 vs. 101:PHPF1	0.7059	0,03343 to 1,378	Yes	*	0.0227															0:DIX25 (PFIG1) vs. 10:DIX19 (PAGA2)	-1.004	-1,676 to -0,3311	Yes	****	<0,0001					0:PMFA2 vs. 101:PHPF1	-0.4802	-0,6408 to -0,3196	Yes	****	<0,0001					0:DIX25 (PFIG1) vs. 10:DIX19 (PAGA2)	-1.338	-1,956 to -0,7205	Yes	****	<0,0001
	0:PMFA2 vs. 101:PYCL076W	0.5263	-0,1462 to 1,199	No	ns	0.5812															0:DIX25 (PFIG1) vs. 10:DIX20 (PYCL076W)	-1.257	-1,930 to -0,5846	Yes	****	<0,0001					0:PMFA2 vs. 101:PYCL076W	-0.5706	-0,7312 to -0,4100	Yes	****	<0,0001					0:DIX25 (PFIG1) vs. 10:DIX20 (PYCL076W)	-0.6819	-1,299 to -0,06440	Yes	**	0.0089
	0:PMFA2 vs. 101:PMFA1	-0.03938	-0,7119 to 0,6331	No	ns	>0,9999															0:DIX25 (PFIG1) vs. 10:DIX21 (PIME4)	-0.6278	-1,300 to 0,04465	No	ns	0.1279					0:PMFA2 vs. 101:PMFA1	-0.5081	-0,6688 to -0,3475	Yes	****	<0,0001					0:DIX25 (PFIG1) vs. 10:DIX21 (PIME4)	-0.003665	-0,6212 to 0,6139	No	ns	>0,9999
	0:PMFA2 vs. 101:PFIG1	0.2482	-0,4243 to 0,9207	No	ns	>0,9999															0:DIX25 (PFIG1) vs. 10:DIX22 (PHPF1)	0.1107	-0,5618 to 0,7832	No	ns	>0,9999					0:PMFA2 vs. 101:PFIG1	-0.6135	-0,7741 to -0,4528	Yes	****	<0,0001					0:DIX25 (PFIG1) vs. 10:DIX22 (PHPF1)	-0.5927	-1,210 to 0,02486	No	ns	0.0899
	0:PMFA2 vs. 101:PAGA2	-0.09773	-0,7702 to 0,5748	No	ns	>0,9999															0:DIX25 (PFIG1) vs. 10:DIX23 (PCSS1)	-0.03828	-0,7108 to 0,6342	No	ns	>0,9999					0:PMFA2 vs. 101:PAGA2	-0.5384	-0,6991 to -0,3778	Yes	****	<0,0001					0:DIX25 (PFIG1) vs. 10:DIX23 (PCSS1)	0.1782	-0,4393 to 0,7957	No	ns	>0,9999
	0:PMFA2 vs. 101:PFUS1	-0.2934	-0,9659 to 0,3791	No	ns	>0,9999															0:DIX25 (PFIG1) vs. 10:DIX24 (PFUS1)	-1.495	-2,168 to -0,8228	Yes	****	<0,0001					0:PMFA2 vs. 101:PFUS1	-0.6235	-0,7841 to -0,4629	Yes	****	<0,0001					0:DIX25 (PFIG1) vs. 10:DIX24 (PFUS1)	-1.449	-2,066 to -0,8311	Yes	****	<0,0001
	0:PMFA2 vs. 101:PMFA2	-1.42	-1,870 to -0,9692	Yes	****	<0,0001															0:DIX25 (PFIG1) vs. 10:DIX25 (PFIG1)	-1.42	-1,870 to -0,9692	Yes	****	<0,0001					0:PMFA2 vs. 101:PMFA2	-0.5027	-0,6103 to -0,3950	Yes	****	<0,0001					0:DIX25 (PFIG1) vs. 10:DIX25 (PFIG1)	-0.9171	-1,331 to -0,5033	Yes	****	<0,0001
	0:PMFA2 vs. 102:Neg.Con.	2.035	1,231 to 2,838	Yes	****	<0,0001															0:DIX25 (PFIG1) vs. 100:DIX14 (Neg.Con.)	-0.008889	-0,8127 to 0,7949	No	ns	>0,9999					0:PMFA2 vs. 102:Neg.Con.	-0.504	-0,6960 to -0,3120	Yes	****	<0,0001					0:DIX25 (PFIG1) vs. 100:DIX14 (Neg.Con.)	0.7598	0,02174 to 1,498	Yes	*	0.0316
	0:PMFA2 vs. 102:PPGK1	-0.2927	-1,096 to 0,5111	No	ns	>0,9999															0:DIX25 (PFIG1) vs. 100:DIX27 (PPGK1)	-0.002	-0,8058 to 0,8018	No	ns	>0,9999					0:PMFA2 vs. 102:PPGK1	-0.4751	-0,6670 to -0,2831	Yes	****	<0,0001					0:DIX25 (PFIG1) vs. 100:DIX27 (PPGK1)	-1.596	-2,334 to -0,8583	Yes	****	<0,0001
	0:PMFA2 vs. 102:PTDH3	-1.237	-2,041 to -0,4332	Yes	****	<0,0001															0:DIX25 (PFIG1) vs. 100:DIX28 (PTDH3)	-0.02684	-0,8306 to 0,7769	No	ns	>0,9999					0:PMFA2 vs. 102:PTDH3	-0.5039	-0,6959 to -0,3120	Yes	****	<0,0001					0:DIX25 (PFIG1) vs. 100:DIX28 (PTDH3)	-2.512	-3,250 to -1,774	Yes	****	<0,0001
	0:PMFA2 vs. 102:PCSS1	1.452	0,8071 to 2,096	Yes	****	<0,0001															0:DIX25 (PFIG1) vs. 100:DIX17 (PMFA2)	-0.6271	-1,272 to 0,01735	No	ns	0.0744					0:PMFA2 vs. 102:PCSS1	-0.5883	-0,7422 to -0,4343	Yes	****	<0,0001					0:DIX25 (PFIG1) vs. 100:DIX17 (PMFA2)	-2.613	-3,205 to -2,021	Yes	****	<0,0001
	0:PMFA2 vs. 102:PIME4	1.237	0,5928 to 1,882	Yes	****	<0,0001															0:DIX25 (PFIG1) vs. 100:DIX18 (PMFA1)	-0.6418	-1,286 to 0,002646	No	ns	0.0532					0:PMFA2 vs. 102:PIME4	-0.6207	-0,7746 to -0,4668	Yes	****	<0,0001					0:DIX25 (PFIG1) vs. 100:DIX18 (PMFA1)	-1.227	-1,819 to -0,6353	Yes	****	<0,0001
	0:PMFA2 vs. 102:PHPF1	0.7705	0,1260 to 1,415	Yes	**	0.0016															0:DIX25 (PFIG1) vs. 100:DIX19 (PAGA2)	-0.939	-1,583 to -0,2946	Yes	****	<0,0001					0:PMFA2 vs. 102:PHPF1	-0.4985	-0,6525 to -0,3446	Yes	****	<0,0001					0:DIX25 (PFIG1) vs. 100:DIX19 (PAGA2)	-1.255	-1,847 to -0,6634	Yes	****	<0,0001
	0:PMFA2 vs. 102:PYCL076W	0.5908	-0,05363 to 1,235	No	ns	0.1585															0:DIX25 (PFIG1) vs. 100:DIX20 (PYCL076W)	-1.193	-1,837 to -0,5481	Yes	****	<0,0001					0:PMFA2 vs. 102:PYCL076W	-0.5889	-0,7428 to -0,4350	Yes	****	<0,0001					0:DIX25 (PFIG1) vs. 100:DIX20 (PYCL076W)	-0.599	-1,191 to -0,007244	Yes	*	0.0414
	0:PMFA2 vs. 102:PMFA1	0.02518	-0,6193 to 0,6696	No	ns	>0,9999															0:DIX25 (PFIG1) vs. 100:DIX21 (PIME4)	-0.5633	-1,208 to 0,08117	No	ns	0.2605					0:PMFA2 vs. 102:PMFA1	-0.5265	-0,6804 to -0,3726	Yes	****	<0,0001					0:DIX25 (PFIG1) vs. 100:DIX21 (PIME4)	0.07923	-0,5125 to 0,6710	No	ns	>0,9999
	0:PMFA2 vs. 102:PFIG1	0.3127	-0,3317 to 0,9572	No	ns	>0,9999															0:DIX25 (PFIG1) vs. 100:DIX22 (PHPF1)	0.1753	-0,4692 to 0,8197	No	ns	>0,9999					0:PMFA2 vs. 102:PFIG1	-0.6318	-0,7857 to -0,4779	Yes	****	<0,0001					0:DIX25 (PFIG1) vs. 100:DIX22 (PHPF1)	-0.5098	-1,102 to 0,08201	No	ns	0.2975
	0:PMFA2 vs. 102:PAGA2	-0.03317	-0,6776 to 0,6113	No	ns	>0,9999															0:DIX25 (PFIG1) vs. 100:DIX23 (PCSS1)	0.02627	-0,6182 to 0,6707	No	ns	>0,9999					0:PMFA2 vs. 102:PAGA2	-0.5568	-0,7107 to -0,4028	Yes	****	<0,0001					0:DIX25 (PFIG1) vs. 100:DIX23 (PCSS1)	0.2611	-0,3307 to 0,8529	No	ns	>0,9999
	0:PMFA2 vs. 102:PFUS1	-0.2288	-0,8733 to 0,4156	No	ns	>0,9999															0:DIX25 (PFIG1) vs. 100:DIX24 (PFUS1)	-1.431	-2,075 to -0,7863	Yes	****	<0,0001					0:PMFA2 vs. 102:PFUS1	-0.6418	-0,7958 to -0,4879	Yes	****	<0,0001					0:DIX25 (PFIG1) vs. 100:DIX24 (PFUS1)	-1.366	-1,958 to -0,7740	Yes	****	<0,0001
	0:PMFA2 vs. 102:PMFA2	-1.355	-1,763 to -0,9476	Yes	****	<0,0001															0:DIX25 (PFIG1) vs. 100:DIX25 (PFIG1)	-1.355	-1,763 to -0,9476	Yes	****	<0,0001					0:PMFA2 vs. 102:PMFA2	-0.521	-0,6183 to -0,4236	Yes	****	<0,0001					0:DIX25 (PFIG1) vs. 100:DIX25 (PFIG1)	-0.8342	-1,208 to -0,4600	Yes	****	<0,0001
	10-4:PCSS1 vs. 10-4:PIME4	-0.2143	-0,7135 to 0,2849	No	ns	>0,9999															0.0001:DIX17 (PMFA2) vs. 0.0001:DIX18 (PMFA1)	-0.01471	-0,5139 to 0,4845	No	ns	>0,9999					10-4:PCSS1 vs. 10-4:PIME4	-0.03243	-0,1517 to 0,08680	No	ns	>0,9999					0.0001:DIX17 (PMFA2) vs. 0.0001:DIX18 (PMFA1)	1.386	0,9275 to 1,844	Yes	****	<0,0001
	10-4:PCSS1 vs. 10-4:PHPF1	-0.6811	-1,180 to -0,1819	Yes	****	<0,0001															0.0001:DIX17 (PMFA2) vs. 0.0001:DIX19 (PAGA2)	-0.3119	-0,8111 to 0,1873	No	ns	0.9773					10-4:PCSS1 vs. 10-4:PHPF1	0.08974	-0,02949 to 0,2090	No	ns	0.6947					0.0001:DIX17 (PMFA2) vs. 0.0001:DIX19 (PAGA2)	1.358	0,8994 to 1,816	Yes	****	<0,0001
	10-4:PCSS1 vs. 10-4:PYCL076W	-0.8607	-1,360 to -0,3615	Yes	****	<0,0001															0.0001:DIX17 (PMFA2) vs. 0.0001:DIX20 (PYCL076W)	-0.5654	-1,065 to -0,06625	Yes	**	0.0053					10-4:PCSS1 vs. 10-4:PYCL076W	-0.0006425	-0,1199 to 0,1186	No	ns	>0,9999					0.0001:DIX17 (PMFA2) vs. 0.0001:DIX20 (PYCL076W)	2.014	1,556 to 2,472	Yes	****	<0,0001
	10-4:PCSS1 vs. 10-4:PMFA1	-1.426	-1,926 to -0,9272	Yes	****	<0,0001															0.0001:DIX17 (PMFA2) vs. 0.0001:DIX21 (PIME4)	0.06382	-0,4354 to 0,5630	No	ns	>0,9999					10-4:PCSS1 vs. 10-4:PMFA1	0.06179	-0,05745 to 0,1810	No	ns	0.9998					0.0001:DIX17 (PMFA2) vs. 0.0001:DIX21 (PIME4)	2.692	2,234 to 3,151	Yes	****	<0,0001
	10-4:PCSS1 vs. 10-4:PFIG1	-1.139	-1,638 to -0,6396	Yes	****	<0,0001															0.0001:DIX17 (PMFA2) vs. 0.0001:DIX22 (PHPF1)	0.8024	0,3032 to 1,302	Yes	****	<0,0001					10-4:PCSS1 vs. 10-4:PFIG1	-0.04353	-0,1628 to 0,07571	No	ns	>0,9999					0.0001:DIX17 (PMFA2) vs. 0.0001:DIX22 (PHPF1)	2.103	1,645 to 2,562	Yes	****	<0,0001
	10-4:PCSS1 vs. 10-4:PAGA2	-1.485	-1,984 to -0,9855	Yes	****	<0,0001															0.0001:DIX17 (PMFA2) vs. 0.0001:DIX23 (PCSS1)	0.6534	0,1542 to 1,153	Yes	***	0.0002					10-4:PCSS1 vs. 10-4:PAGA2	0.0315	-0,08773 to 0,1507	No	ns	>0,9999					0.0001:DIX17 (PMFA2) vs. 0.0001:DIX23 (PCSS1)	2.874	2,416 to 3,332	Yes	****	<0,0001
	10-4:PCSS1 vs. 10-4:PFUS1	-1.68	-2,180 to -1,181	Yes	****	<0,0001															0.0001:DIX17 (PMFA2) vs. 0.0001:DIX24 (PFUS1)	-0.8036	-1,303 to -0,3044	Yes	****	<0,0001					10-4:PCSS1 vs. 10-4:PFUS1	-0.05356	-0,1728 to 0,06567	No	ns	>0,9999					0.0001:DIX17 (PMFA2) vs. 0.0001:DIX24 (PFUS1)	1.247	0,7888 to 1,706	Yes	****	<0,0001
	10-4:PCSS1 vs. 10-4:PMFA2	-2.807	-3,306 to -2,308	Yes	****	<0,0001															0.0001:DIX17 (PMFA2) vs. 0.0001:DIX25 (PFIG1)	-0.7281	-1,227 to -0,2289	Yes	****	<0,0001					10-4:PCSS1 vs. 10-4:PMFA2	0.06728	-0,05195 to 0,1865	No	ns	0.9977					0.0001:DIX17 (PMFA2) vs. 0.0001:DIX25 (PFIG1)	1.779	1,320 to 2,237	Yes	****	<0,0001
	10-4:PCSS1 vs. 10-3:PCSS1	-0.5853	-1,056 to -0,1146	Yes	***	0.0006															0.0001:DIX17 (PMFA2) vs. 0.001:DIX17 (PMFA2)	-0.5853	-1,056 to -0,1146	Yes	***	0.0006					10-4:PCSS1 vs. 10-3:PCSS1	-0.1268	-0,2392 to -0,01441	Yes	**	0.0057					0.0001:DIX17 (PMFA2) vs. 0.001:DIX17 (PMFA2)	-0.4584	-0,8906 to -0,02627	Yes	*	0.0189
	10-4:PCSS1 vs. 10-3:PIME4	-0.7996	-1,486 to -0,1135	Yes	**	0.0029															0.0001:DIX17 (PMFA2) vs. 0.001:DIX18 (PMFA1)	-0.6	-1,286 to 0,08609	No	ns	0.2592					10-4:PCSS1 vs. 10-3:PIME4	-0.1593	-0,3231 to 0,004613	No	ns	0.0758					0.0001:DIX17 (PMFA2) vs. 0.001:DIX18 (PMFA1)	0.9274	0,2974 to 1,557	Yes	****	<0,0001
	10-4:PCSS1 vs. 10-3:PHPF1	-1.266	-1,952 to -0,5803	Yes	****	<0,0001															0.0001:DIX17 (PMFA2) vs. 0.001:DIX19 (PAGA2)	-0.8972	-1,583 to -0,2111	Yes	***	0.0002					10-4:PCSS1 vs. 10-3:PHPF1	-0.03709	-0,2010 to 0,1268	No	ns	>0,9999					0.0001:DIX17 (PMFA2) vs. 0.001:DIX19 (PAGA2)	0.8994	0,2694 to 1,529	Yes	****	<0,0001
	10-4:PCSS1 vs. 10-3:PYCL076W	-1.446	-2,132 to -0,7599	Yes	****	<0,0001															0.0001:DIX17 (PMFA2) vs. 0.001:DIX20 (PYCL076W)	-1.151	-1,837 to -0,4646	Yes	****	<0,0001					10-4:PCSS1 vs. 10-3:PYCL076W	-0.1275	-0,2913 to 0,03640	No	ns	0.5994					0.0001:DIX17 (PMFA2) vs. 0.001:DIX20 (PYCL076W)	1.556	0,9255 to 2,186	Yes	****	<0,0001
	10-4:PCSS1 vs. 10-3:PMFA1	-2.012	-2,698 to -1,326	Yes	****	<0,0001															0.0001:DIX17 (PMFA2) vs. 0.001:DIX21 (PIME4)	-0.5215	-1,208 to 0,1646	No	ns	0.6674					10-4:PCSS1 vs. 10-3:PMFA1	-0.06504	-0,2289 to 0,09883	No	ns	>0,9999					0.0001:DIX17 (PMFA2) vs. 0.001:DIX21 (PIME4)	2.234	1,604 to 2,864	Yes	****	<0,0001
	10-4:PCSS1 vs. 10-3:PFIG1	-1.724	-2,410 to -1,038	Yes	****	<0,0001															0.0001:DIX17 (PMFA2) vs. 0.001:DIX22 (PHPF1)	0.2171	-0,4690 to 0,9032	No	ns	>0,9999					10-4:PCSS1 vs. 10-3:PFIG1	-0.1704	-0,3342 to -0,006485	Yes	*	0.0268					0.0001:DIX17 (PMFA2) vs. 0.001:DIX22 (PHPF1)	1.645	1,015 to 2,275	Yes	****	<0,0001
	10-4:PCSS1 vs. 10-3:PAGA2	-2.07	-2,756 to -1,384	Yes	****	<0,0001															0.0001:DIX17 (PMFA2) vs. 0.001:DIX23 (PCSS1)	0.0681	-0,6180 to 0,7542	No	ns	>0,9999					10-4:PCSS1 vs. 10-3:PAGA2	-0.09533	-0,2592 to 0,06854	No	ns	0.9952					0.0001:DIX17 (PMFA2) vs. 0.001:DIX23 (PCSS1)	2.416	1,786 to 3,046	Yes	****	<0,0001
	10-4:PCSS1 vs. 10-3:PFUS1	-2.266	-2,952 to -1,580	Yes	****	<0,0001															0.0001:DIX17 (PMFA2) vs. 0.001:DIX24 (PFUS1)	-1.389	-2,075 to -0,7028	Yes	****	<0,0001					10-4:PCSS1 vs. 10-3:PFUS1	-0.1804	-0,3443 to -0,01652	Yes	**	0.0094					0.0001:DIX17 (PMFA2) vs. 0.001:DIX24 (PFUS1)	0.7888	0,1588 to 1,419	Yes	***	0.0005
	10-4:PCSS1 vs. 10-3:PMFA2	-3.392	-4,078 to -2,706	Yes	****	<0,0001															0.0001:DIX17 (PMFA2) vs. 0.001:DIX25 (PFIG1)	-1.313	-1,999 to -0,6273	Yes	****	<0,0001					10-4:PCSS1 vs. 10-3:PMFA2	-0.05954	-0,2234 to 0,1043	No	ns	>0,9999					0.0001:DIX17 (PMFA2) vs. 0.001:DIX25 (PFIG1)	1.32	0,6903 to 1,950	Yes	****	<0,0001
	10-4:PCSS1 vs. 10-2:PCSS1	-1.273	-1,744 to -0,8024	Yes	****	<0,0001															0.0001:DIX17 (PMFA2) vs. 0.01:DIX17 (PMFA2)	-1.273	-1,744 to -0,8024	Yes	****	<0,0001					10-4:PCSS1 vs. 10-2:PCSS1	-0.4339	-0,5463 to -0,3214	Yes	****	<0,0001					0.0001:DIX17 (PMFA2) vs. 0.01:DIX17 (PMFA2)	-0.8392	-1,271 to -0,4070	Yes	****	<0,0001
	10-4:PCSS1 vs. 10-2:PIME4	-1.487	-2,173 to -0,8012	Yes	****	<0,0001															0.0001:DIX17 (PMFA2) vs. 0.01:DIX18 (PMFA1)	-1.288	-1,974 to -0,6016	Yes	****	<0,0001					10-4:PCSS1 vs. 10-2:PIME4	-0.4663	-0,6302 to -0,3024	Yes	****	<0,0001					0.0001:DIX17 (PMFA2) vs. 0.01:DIX18 (PMFA1)	0.5467	-0,08326 to 1,177	No	ns	0.2783
	10-4:PCSS1 vs. 10-2:PHPF1	-1.954	-2,640 to -1,268	Yes	****	<0,0001															0.0001:DIX17 (PMFA2) vs. 0.01:DIX19 (PAGA2)	-1.585	-2,271 to -0,8989	Yes	****	<0,0001					10-4:PCSS1 vs. 10-2:PHPF1	-0.3441	-0,5080 to -0,1802	Yes	****	<0,0001					0.0001:DIX17 (PMFA2) vs. 0.01:DIX19 (PAGA2)	0.5187	-0,1113 to 1,149	No	ns	0.426
	10-4:PCSS1 vs. 10-2:PYCL076W	-2.134	-2,820 to -1,448	Yes	****	<0,0001															0.0001:DIX17 (PMFA2) vs. 0.01:DIX20 (PYCL076W)	-1.838	-2,525 to -1,152	Yes	****	<0,0001					10-4:PCSS1 vs. 10-2:PYCL076W	-0.4345	-0,5984 to -0,2706	Yes	****	<0,0001					0.0001:DIX17 (PMFA2) vs. 0.01:DIX20 (PYCL076W)	1.175	0,5448 to 1,805	Yes	****	<0,0001
	10-4:PCSS1 vs. 10-2:PMFA1	-2.699	-3,385 to -2,013	Yes	****	<0,0001															0.0001:DIX17 (PMFA2) vs. 0.01:DIX21 (PIME4)	-1.209	-1,895 to -0,5231	Yes	****	<0,0001					10-4:PCSS1 vs. 10-2:PMFA1	-0.3721	-0,5359 to -0,2082	Yes	****	<0,0001					0.0001:DIX17 (PMFA2) vs. 0.01:DIX21 (PIME4)	1.853	1,223 to 2,483	Yes	****	<0,0001
	10-4:PCSS1 vs. 10-2:PFIG1	-2.412	-3,098 to -1,726	Yes	****	<0,0001															0.0001:DIX17 (PMFA2) vs. 0.01:DIX22 (PHPF1)	-0.4707	-1,157 to 0,2154	No	ns	0.8934					10-4:PCSS1 vs. 10-2:PFIG1	-0.4774	-0,6413 to -0,3135	Yes	****	<0,0001					0.0001:DIX17 (PMFA2) vs. 0.01:DIX22 (PHPF1)	1.264	0,6341 to 1,894	Yes	****	<0,0001
	10-4:PCSS1 vs. 10-2:PAGA2	-2.758	-3,444 to -2,072	Yes	****	<0,0001															0.0001:DIX17 (PMFA2) vs. 0.01:DIX23 (PCSS1)	-0.6196	-1,306 to 0,06644	No	ns	0.1871					10-4:PCSS1 vs. 10-2:PAGA2	-0.4024	-0,5662 to -0,2385	Yes	****	<0,0001					0.0001:DIX17 (PMFA2) vs. 0.01:DIX23 (PCSS1)	2.035	1,405 to 2,665	Yes	****	<0,0001
	10-4:PCSS1 vs. 10-2:PFUS1	-2.953	-3,640 to -2,267	Yes	****	<0,0001															0.0001:DIX17 (PMFA2) vs. 0.01:DIX24 (PFUS1)	-2.077	-2,763 to -1,391	Yes	****	<0,0001					10-4:PCSS1 vs. 10-2:PFUS1	-0.4874	-0,6513 to -0,3236	Yes	****	<0,0001					0.0001:DIX17 (PMFA2) vs. 0.01:DIX24 (PFUS1)	0.4081	-0,2219 to 1,038	No	ns	0.9562
	10-4:PCSS1 vs. 10-2:PMFA2	-4.08	-4,766 to -3,394	Yes	****	<0,0001															0.0001:DIX17 (PMFA2) vs. 0.01:DIX25 (PFIG1)	-2.001	-2,687 to -1,315	Yes	****	<0,0001					10-4:PCSS1 vs. 10-2:PMFA2	-0.3666	-0,5304 to -0,2027	Yes	****	<0,0001					0.0001:DIX17 (PMFA2) vs. 0.01:DIX25 (PFIG1)	0.9396	0,3096 to 1,570	Yes	****	<0,0001
	10-4:PCSS1 vs. 10-1:Neg.Con.	-0.8167	-1,597 to -0,03621	Yes	*	0.024															0.0001:DIX17 (PMFA2) vs. 0.1:DIX14 (Neg.Con.)	-0.7815	-1,562 to -0,001026	Yes	*	0.049					10-4:PCSS1 vs. 10-1:Neg.Con.	-0.4741	-0,6605 to -0,2877	Yes	****	<0,0001					0.0001:DIX17 (PMFA2) vs. 0.1:DIX14 (Neg.Con.)	2.532	1,815 to 3,248	Yes	****	<0,0001
	10-4:PCSS1 vs. 10-1:PPGK1	-3.144	-3,924 to -2,363	Yes	****	<0,0001															0.0001:DIX17 (PMFA2) vs. 0.1:DIX27 (PPGK1)	-0.7746	-1,555 to 0,005863	No	ns	0.056					10-4:PCSS1 vs. 10-1:PPGK1	-0.4452	-0,6316 to -0,2588	Yes	****	<0,0001					0.0001:DIX17 (PMFA2) vs. 0.1:DIX27 (PPGK1)	0.1753	-0,5414 to 0,8920	No	ns	>0,9999
	10-4:PCSS1 vs. 10-1:PTDH3	-4.088	-4,869 to -3,308	Yes	****	<0,0001															0.0001:DIX17 (PMFA2) vs. 0.1:DIX28 (PTDH3)	-0.7995	-1,580 to -0,01898	Yes	*	0.0343					10-4:PCSS1 vs. 10-1:PTDH3	-0.4741	-0,6605 to -0,2877	Yes	****	<0,0001					0.0001:DIX17 (PMFA2) vs. 0.1:DIX28 (PTDH3)	-0.7401	-1,457 to -0,02347	Yes	*	0.0299
	10-4:PCSS1 vs. 10-1:PCSS1	-1.4	-1,850 to -0,9491	Yes	****	<0,0001															0.0001:DIX17 (PMFA2) vs. 0.1:DIX17 (PMFA2)	-1.4	-1,850 to -0,9491	Yes	****	<0,0001					10-4:PCSS1 vs. 10-1:PCSS1	-0.5584	-0,6660 to -0,4508	Yes	****	<0,0001					0.0001:DIX17 (PMFA2) vs. 0.1:DIX17 (PMFA2)	-0.8413	-1,255 to -0,4275	Yes	****	<0,0001
	10-4:PCSS1 vs. 10-1:PIME4	-1.614	-2,286 to -0,9415	Yes	****	<0,0001															0.0001:DIX17 (PMFA2) vs. 0.1:DIX18 (PMFA1)	-1.414	-2,087 to -0,7419	Yes	****	<0,0001					10-4:PCSS1 vs. 10-1:PIME4	-0.5908	-0,7515 to -0,4302	Yes	****	<0,0001					0.0001:DIX17 (PMFA2) vs. 0.1:DIX18 (PMFA1)	0.5446	-0,07294 to 1,162	No	ns	0.2391
	10-4:PCSS1 vs. 10-1:PHPF1	-2.081	-2,753 to -1,408	Yes	****	<0,0001															0.0001:DIX17 (PMFA2) vs. 0.1:DIX19 (PAGA2)	-1.712	-2,384 to -1,039	Yes	****	<0,0001					10-4:PCSS1 vs. 10-1:PHPF1	-0.4687	-0,6293 to -0,3080	Yes	****	<0,0001					0.0001:DIX17 (PMFA2) vs. 0.1:DIX19 (PAGA2)	0.5165	-0,1010 to 1,134	No	ns	0.3792
	10-4:PCSS1 vs. 10-1:PYCL076W	-2.26	-2,933 to -1,588	Yes	****	<0,0001															0.0001:DIX17 (PMFA2) vs. 0.1:DIX20 (PYCL076W)	-1.965	-2,638 to -1,293	Yes	****	<0,0001					10-4:PCSS1 vs. 10-1:PYCL076W	-0.559	-0,7197 to -0,3984	Yes	****	<0,0001					0.0001:DIX17 (PMFA2) vs. 0.1:DIX20 (PYCL076W)	1.173	0,5551 to 1,790	Yes	****	<0,0001
	10-4:PCSS1 vs. 10-1:PMFA1	-2.826	-3,499 to -2,154	Yes	****	<0,0001															0.0001:DIX17 (PMFA2) vs. 0.1:DIX21 (PIME4)	-1.336	-2,008 to -0,6634	Yes	****	<0,0001					10-4:PCSS1 vs. 10-1:PMFA1	-0.4966	-0,6572 to -0,3360	Yes	****	<0,0001					0.0001:DIX17 (PMFA2) vs. 0.1:DIX21 (PIME4)	1.851	1,233 to 2,468	Yes	****	<0,0001
	10-4:PCSS1 vs. 10-1:PFIG1	-2.539	-3,211 to -1,866	Yes	****	<0,0001															0.0001:DIX17 (PMFA2) vs. 0.1:DIX22 (PHPF1)	-0.5974	-1,270 to 0,07514	No	ns	0.2226					10-4:PCSS1 vs. 10-1:PFIG1	-0.6019	-0,7626 to -0,4413	Yes	****	<0,0001					0.0001:DIX17 (PMFA2) vs. 0.1:DIX22 (PHPF1)	1.262	0,6444 to 1,879	Yes	****	<0,0001
	10-4:PCSS1 vs. 10-1:PAGA2	-2.884	-3,557 to -2,212	Yes	****	<0,0001															0.0001:DIX17 (PMFA2) vs. 0.1:DIX23 (PCSS1)	-0.7463	-1,419 to -0,07385	Yes	**	0.008					10-4:PCSS1 vs. 10-1:PAGA2	-0.5269	-0,6875 to -0,3663	Yes	****	<0,0001					0.0001:DIX17 (PMFA2) vs. 0.1:DIX23 (PCSS1)	2.033	1,415 to 2,650	Yes	****	<0,0001
	10-4:PCSS1 vs. 10-1:PFUS1	-3.08	-3,753 to -2,408	Yes	****	<0,0001															0.0001:DIX17 (PMFA2) vs. 0.1:DIX24 (PFUS1)	-2.203	-2,876 to -1,531	Yes	****	<0,0001					10-4:PCSS1 vs. 10-1:PFUS1	-0.612	-0,7726 to -0,4513	Yes	****	<0,0001					0.0001:DIX17 (PMFA2) vs. 0.1:DIX24 (PFUS1)	0.4059	-0,2116 to 1,023	No	ns	0.9439
	10-4:PCSS1 vs. 10-1:PMFA2	-4.207	-4,879 to -3,534	Yes	****	<0,0001															0.0001:DIX17 (PMFA2) vs. 0.1:DIX25 (PFIG1)	-2.128	-2,800 to -1,455	Yes	****	<0,0001					10-4:PCSS1 vs. 10-1:PMFA2	-0.4911	-0,6517 to -0,3305	Yes	****	<0,0001					0.0001:DIX17 (PMFA2) vs. 0.1:DIX25 (PFIG1)	0.9375	0,3199 to 1,555	Yes	****	<0,0001
	10-4:PCSS1 vs. 100:PCSS1	-1.563	-2,033 to -1,092	Yes	****	<0,0001															0.0001:DIX17 (PMFA2) vs. 1:DIX17 (PMFA2)	-1.563	-2,033 to -1,092	Yes	****	<0,0001					10-4:PCSS1 vs. 100:PCSS1	-0.6013	-0,7137 to -0,4888	Yes	****	<0,0001					0.0001:DIX17 (PMFA2) vs. 1:DIX17 (PMFA2)	-0.9614	-1,394 to -0,5293	Yes	****	<0,0001
	10-4:PCSS1 vs. 100:PIME4	-1.777	-2,463 to -1,091	Yes	****	<0,0001															0.0001:DIX17 (PMFA2) vs. 1:DIX18 (PMFA1)	-1.577	-2,263 to -0,8913	Yes	****	<0,0001					10-4:PCSS1 vs. 100:PIME4	-0.6337	-0,7976 to -0,4698	Yes	****	<0,0001					0.0001:DIX17 (PMFA2) vs. 1:DIX18 (PMFA1)	0.4245	-0,2055 to 1,054	No	ns	0.9177
	10-4:PCSS1 vs. 100:PHPF1	-2.244	-2,930 to -1,558	Yes	****	<0,0001															0.0001:DIX17 (PMFA2) vs. 1:DIX19 (PAGA2)	-1.875	-2,561 to -1,189	Yes	****	<0,0001					10-4:PCSS1 vs. 100:PHPF1	-0.5115	-0,6754 to -0,3476	Yes	****	<0,0001					0.0001:DIX17 (PMFA2) vs. 1:DIX19 (PAGA2)	0.3964	-0,2336 to 1,026	No	ns	0.974
	10-4:PCSS1 vs. 100:PYCL076W	-2.423	-3,110 to -1,737	Yes	****	<0,0001															0.0001:DIX17 (PMFA2) vs. 1:DIX20 (PYCL076W)	-2.128	-2,814 to -1,442	Yes	****	<0,0001					10-4:PCSS1 vs. 100:PYCL076W	-0.6019	-0,7658 to -0,4380	Yes	****	<0,0001					0.0001:DIX17 (PMFA2) vs. 1:DIX20 (PYCL076W)	1.053	0,4225 to 1,683	Yes	****	<0,0001
	10-4:PCSS1 vs. 100:PMFA1	-2.989	-3,675 to -2,303	Yes	****	<0,0001															0.0001:DIX17 (PMFA2) vs. 1:DIX21 (PIME4)	-1.499	-2,185 to -0,8128	Yes	****	<0,0001					10-4:PCSS1 vs. 100:PMFA1	-0.5395	-0,7033 to -0,3756	Yes	****	<0,0001					0.0001:DIX17 (PMFA2) vs. 1:DIX21 (PIME4)	1.731	1,101 to 2,361	Yes	****	<0,0001
	10-4:PCSS1 vs. 100:PFIG1	-2.702	-3,388 to -2,015	Yes	****	<0,0001															0.0001:DIX17 (PMFA2) vs. 1:DIX22 (PHPF1)	-0.7603	-1,446 to -0,07426	Yes	**	0.0083					10-4:PCSS1 vs. 100:PFIG1	-0.6448	-0,8087 to -0,4809	Yes	****	<0,0001					0.0001:DIX17 (PMFA2) vs. 1:DIX22 (PHPF1)	1.142	0,5118 to 1,772	Yes	****	<0,0001
	10-4:PCSS1 vs. 100:PAGA2	-3.047	-3,734 to -2,361	Yes	****	<0,0001															0.0001:DIX17 (PMFA2) vs. 1:DIX23 (PCSS1)	-0.9093	-1,595 to -0,2232	Yes	***	0.0001					10-4:PCSS1 vs. 100:PAGA2	-0.5698	-0,7336 to -0,4059	Yes	****	<0,0001					0.0001:DIX17 (PMFA2) vs. 1:DIX23 (PCSS1)	1.913	1,283 to 2,543	Yes	****	<0,0001
	10-4:PCSS1 vs. 100:PFUS1	-3.243	-3,929 to -2,557	Yes	****	<0,0001															0.0001:DIX17 (PMFA2) vs. 1:DIX24 (PFUS1)	-2.366	-3,052 to -1,680	Yes	****	<0,0001					10-4:PCSS1 vs. 100:PFUS1	-0.6548	-0,8187 to -0,4910	Yes	****	<0,0001					0.0001:DIX17 (PMFA2) vs. 1:DIX24 (PFUS1)	0.2858	-0,3442 to 0,9158	No	ns	>0,9999
	10-4:PCSS1 vs. 100:PMFA2	-4.369	-5,056 to -3,683	Yes	****	<0,0001															0.0001:DIX17 (PMFA2) vs. 1:DIX25 (PFIG1)	-2.291	-2,977 to -1,605	Yes	****	<0,0001					10-4:PCSS1 vs. 100:PMFA2	-0.534	-0,6978 to -0,3701	Yes	****	<0,0001					0.0001:DIX17 (PMFA2) vs. 1:DIX25 (PFIG1)	0.8173	0,1873 to 1,447	Yes	***	0.0002
	10-4:PCSS1 vs. 101:PCSS1	-1.502	-1,973 to -1,032	Yes	****	<0,0001															0.0001:DIX17 (PMFA2) vs. 10:DIX17 (PMFA2)	-1.502	-1,973 to -1,032	Yes	****	<0,0001					10-4:PCSS1 vs. 101:PCSS1	-0.527	-0,6394 to -0,4146	Yes	****	<0,0001					0.0001:DIX17 (PMFA2) vs. 10:DIX17 (PMFA2)	-0.9752	-1,407 to -0,5430	Yes	****	<0,0001
	10-4:PCSS1 vs. 101:PIME4	-1.716	-2,403 to -1,030	Yes	****	<0,0001															0.0001:DIX17 (PMFA2) vs. 10:DIX18 (PMFA1)	-1.517	-2,203 to -0,8308	Yes	****	<0,0001					10-4:PCSS1 vs. 101:PIME4	-0.5594	-0,7233 to -0,3956	Yes	****	<0,0001					0.0001:DIX17 (PMFA2) vs. 10:DIX18 (PMFA1)	0.4107	-0,2193 to 1,041	No	ns	0.9511
	10-4:PCSS1 vs. 101:PHPF1	-2.183	-2,869 to -1,497	Yes	****	<0,0001															0.0001:DIX17 (PMFA2) vs. 10:DIX19 (PAGA2)	-1.814	-2,500 to -1,128	Yes	****	<0,0001					10-4:PCSS1 vs. 101:PHPF1	-0.4373	-0,6011 to -0,2734	Yes	****	<0,0001					0.0001:DIX17 (PMFA2) vs. 10:DIX19 (PAGA2)	0.3826	-0,2474 to 1,013	No	ns	0.9872
	10-4:PCSS1 vs. 101:PYCL076W	-2.363	-3,049 to -1,677	Yes	****	<0,0001															0.0001:DIX17 (PMFA2) vs. 10:DIX20 (PYCL076W)	-2.068	-2,754 to -1,382	Yes	****	<0,0001					10-4:PCSS1 vs. 101:PYCL076W	-0.5276	-0,6915 to -0,3638	Yes	****	<0,0001					0.0001:DIX17 (PMFA2) vs. 10:DIX20 (PYCL076W)	1.039	0,4088 to 1,669	Yes	****	<0,0001
	10-4:PCSS1 vs. 101:PMFA1	-2.929	-3,615 to -2,243	Yes	****	<0,0001															0.0001:DIX17 (PMFA2) vs. 10:DIX21 (PIME4)	-1.438	-2,124 to -0,7523	Yes	****	<0,0001					10-4:PCSS1 vs. 101:PMFA1	-0.4652	-0,6291 to -0,3013	Yes	****	<0,0001					0.0001:DIX17 (PMFA2) vs. 10:DIX21 (PIME4)	1.717	1,087 to 2,347	Yes	****	<0,0001
	10-4:PCSS1 vs. 101:PFIG1	-2.641	-3,327 to -1,955	Yes	****	<0,0001															0.0001:DIX17 (PMFA2) vs. 10:DIX22 (PHPF1)	-0.6998	-1,386 to -0,01375	Yes	*	0.0367					10-4:PCSS1 vs. 101:PFIG1	-0.5705	-0,7344 to -0,4067	Yes	****	<0,0001					0.0001:DIX17 (PMFA2) vs. 10:DIX22 (PHPF1)	1.128	0,4980 to 1,758	Yes	****	<0,0001
	10-4:PCSS1 vs. 101:PAGA2	-2.987	-3,673 to -2,301	Yes	****	<0,0001															0.0001:DIX17 (PMFA2) vs. 10:DIX23 (PCSS1)	-0.8488	-1,535 to -0,1627	Yes	***	0.0007					10-4:PCSS1 vs. 101:PAGA2	-0.4955	-0,6594 to -0,3316	Yes	****	<0,0001					0.0001:DIX17 (PMFA2) vs. 10:DIX23 (PCSS1)	1.899	1,269 to 2,529	Yes	****	<0,0001
	10-4:PCSS1 vs. 101:PFUS1	-3.183	-3,869 to -2,497	Yes	****	<0,0001															0.0001:DIX17 (PMFA2) vs. 10:DIX24 (PFUS1)	-2.306	-2,992 to -1,620	Yes	****	<0,0001					10-4:PCSS1 vs. 101:PFUS1	-0.5806	-0,7444 to -0,4167	Yes	****	<0,0001					0.0001:DIX17 (PMFA2) vs. 10:DIX24 (PFUS1)	0.272	-0,3580 to 0,9020	No	ns	>0,9999
	10-4:PCSS1 vs. 101:PMFA2	-4.309	-4,995 to -3,623	Yes	****	<0,0001															0.0001:DIX17 (PMFA2) vs. 10:DIX25 (PFIG1)	-2.23	-2,916 to -1,544	Yes	****	<0,0001					10-4:PCSS1 vs. 101:PMFA2	-0.4597	-0,6236 to -0,2958	Yes	****	<0,0001					0.0001:DIX17 (PMFA2) vs. 10:DIX25 (PFIG1)	0.8036	0,1736 to 1,434	Yes	***	0.0003
	10-4:PCSS1 vs. 102:Neg.Con.	-0.8546	-1,635 to -0,07413	Yes	*	0.0105															0.0001:DIX17 (PMFA2) vs. 100:DIX14 (Neg.Con.)	-0.8194	-1,600 to -0,03895	Yes	*	0.0226					10-4:PCSS1 vs. 102:Neg.Con.	-0.461	-0,6475 to -0,2746	Yes	****	<0,0001					0.0001:DIX17 (PMFA2) vs. 100:DIX14 (Neg.Con.)	2.481	1,764 to 3,197	Yes	****	<0,0001
	10-4:PCSS1 vs. 102:PPGK1	-3.182	-3,962 to -2,401	Yes	****	<0,0001															0.0001:DIX17 (PMFA2) vs. 100:DIX27 (PPGK1)	-0.8125	-1,593 to -0,03206	Yes	*	0.0262					10-4:PCSS1 vs. 102:PPGK1	-0.4321	-0,6185 to -0,2457	Yes	****	<0,0001					0.0001:DIX17 (PMFA2) vs. 100:DIX27 (PPGK1)	0.1243	-0,5924 to 0,8410	No	ns	>0,9999
	10-4:PCSS1 vs. 102:PTDH3	-4.126	-4,907 to -3,346	Yes	****	<0,0001															0.0001:DIX17 (PMFA2) vs. 100:DIX28 (PTDH3)	-0.8374	-1,618 to -0,05690	Yes	*	0.0154					10-4:PCSS1 vs. 102:PTDH3	-0.461	-0,6474 to -0,2746	Yes	****	<0,0001					0.0001:DIX17 (PMFA2) vs. 100:DIX28 (PTDH3)	-0.7911	-1,508 to -0,07446	Yes	**	0.0089
	10-4:PCSS1 vs. 102:PCSS1	-1.438	-1,888 to -0,9870	Yes	****	<0,0001															0.0001:DIX17 (PMFA2) vs. 100:DIX17 (PMFA2)	-1.438	-1,888 to -0,9870	Yes	****	<0,0001					10-4:PCSS1 vs. 102:PCSS1	-0.5453	-0,6530 to -0,4377	Yes	****	<0,0001					0.0001:DIX17 (PMFA2) vs. 100:DIX17 (PMFA2)	-0.8923	-1,306 to -0,4785	Yes	****	<0,0001
	10-4:PCSS1 vs. 102:PIME4	-1.652	-2,324 to -0,9794	Yes	****	<0,0001															0.0001:DIX17 (PMFA2) vs. 100:DIX18 (PMFA1)	-1.452	-2,125 to -0,7799	Yes	****	<0,0001					10-4:PCSS1 vs. 102:PIME4	-0.5778	-0,7384 to -0,4171	Yes	****	<0,0001					0.0001:DIX17 (PMFA2) vs. 100:DIX18 (PMFA1)	0.4936	-0,1239 to 1,111	No	ns	0.5164
	10-4:PCSS1 vs. 102:PHPF1	-2.119	-2,791 to -1,446	Yes	****	<0,0001															0.0001:DIX17 (PMFA2) vs. 100:DIX19 (PAGA2)	-1.75	-2,422 to -1,077	Yes	****	<0,0001					10-4:PCSS1 vs. 102:PHPF1	-0.4556	-0,6162 to -0,2950	Yes	****	<0,0001					0.0001:DIX17 (PMFA2) vs. 100:DIX19 (PAGA2)	0.4655	-0,1520 to 1,083	No	ns	0.6903
	10-4:PCSS1 vs. 102:PYCL076W	-2.298	-2,971 to -1,626	Yes	****	<0,0001															0.0001:DIX17 (PMFA2) vs. 100:DIX20 (PYCL076W)	-2.003	-2,676 to -1,331	Yes	****	<0,0001					10-4:PCSS1 vs. 102:PYCL076W	-0.546	-0,7066 to -0,3854	Yes	****	<0,0001					0.0001:DIX17 (PMFA2) vs. 100:DIX20 (PYCL076W)	1.122	0,5042 to 1,739	Yes	****	<0,0001
	10-4:PCSS1 vs. 102:PMFA1	-2.864	-3,537 to -2,192	Yes	****	<0,0001															0.0001:DIX17 (PMFA2) vs. 100:DIX21 (PIME4)	-1.374	-2,046 to -0,7013	Yes	****	<0,0001					10-4:PCSS1 vs. 102:PMFA1	-0.4836	-0,6442 to -0,3229	Yes	****	<0,0001					0.0001:DIX17 (PMFA2) vs. 100:DIX21 (PIME4)	1.8	1,182 to 2,417	Yes	****	<0,0001
	10-4:PCSS1 vs. 102:PFIG1	-2.576	-3,249 to -1,904	Yes	****	<0,0001															0.0001:DIX17 (PMFA2) vs. 100:DIX22 (PHPF1)	-0.6353	-1,308 to 0,03721	No	ns	0.1105					10-4:PCSS1 vs. 102:PFIG1	-0.5889	-0,7495 to -0,4282	Yes	****	<0,0001					0.0001:DIX17 (PMFA2) vs. 100:DIX22 (PHPF1)	1.211	0,5934 to 1,828	Yes	****	<0,0001
	10-4:PCSS1 vs. 102:PAGA2	-2.922	-3,595 to -2,250	Yes	****	<0,0001															0.0001:DIX17 (PMFA2) vs. 100:DIX23 (PCSS1)	-0.7843	-1,457 to -0,1118	Yes	**	0.0028					10-4:PCSS1 vs. 102:PAGA2	-0.5138	-0,6745 to -0,3532	Yes	****	<0,0001					0.0001:DIX17 (PMFA2) vs. 100:DIX23 (PCSS1)	1.982	1,364 to 2,599	Yes	****	<0,0001
	10-4:PCSS1 vs. 102:PFUS1	-3.118	-3,791 to -2,446	Yes	****	<0,0001															0.0001:DIX17 (PMFA2) vs. 100:DIX24 (PFUS1)	-2.241	-2,914 to -1,569	Yes	****	<0,0001					10-4:PCSS1 vs. 102:PFUS1	-0.5989	-0,7595 to -0,4383	Yes	****	<0,0001					0.0001:DIX17 (PMFA2) vs. 100:DIX24 (PFUS1)	0.3549	-0,2626 to 0,9724	No	ns	0.9964
	10-4:PCSS1 vs. 102:PMFA2	-4.244	-4,917 to -3,572	Yes	****	<0,0001															0.0001:DIX17 (PMFA2) vs. 100:DIX25 (PFIG1)	-2.166	-2,838 to -1,493	Yes	****	<0,0001					10-4:PCSS1 vs. 102:PMFA2	-0.4781	-0,6387 to -0,3174	Yes	****	<0,0001					0.0001:DIX17 (PMFA2) vs. 100:DIX25 (PFIG1)	0.8865	0,2690 to 1,504	Yes	****	<0,0001
	10-4:PIME4 vs. 10-4:PHPF1	-0.4668	-0,9660 to 0,03237	No	ns	0.1254															0.0001:DIX18 (PMFA1) vs. 0.0001:DIX19 (PAGA2)	-0.2972	-0,7964 to 0,2020	No	ns	0.9917					10-4:PIME4 vs. 10-4:PHPF1	0.1222	0,002937 to 0,2414	Yes	*	0.0341					0.0001:DIX18 (PMFA1) vs. 0.0001:DIX19 (PAGA2)	-0.02806	-0,4865 to 0,4303	No	ns	>0,9999
	10-4:PIME4 vs. 10-4:PYCL076W	-0.6465	-1,146 to -0,1473	Yes	***	0.0002															0.0001:DIX18 (PMFA1) vs. 0.0001:DIX20 (PYCL076W)	-0.5507	-1,050 to -0,05155	Yes	**	0.009					10-4:PIME4 vs. 10-4:PYCL076W	0.03179	-0,08745 to 0,1510	No	ns	>0,9999					0.0001:DIX18 (PMFA1) vs. 0.0001:DIX20 (PYCL076W)	0.6281	0,1697 to 1,086	Yes	****	<0,0001
	10-4:PIME4 vs. 10-4:PMFA1	-1.212	-1,711 to -0,7129	Yes	****	<0,0001															0.0001:DIX18 (PMFA1) vs. 0.0001:DIX21 (PIME4)	0.07852	-0,4207 to 0,5777	No	ns	>0,9999					10-4:PIME4 vs. 10-4:PMFA1	0.09421	-0,02502 to 0,2134	No	ns	0.5517					0.0001:DIX18 (PMFA1) vs. 0.0001:DIX21 (PIME4)	1.306	0,8479 to 1,765	Yes	****	<0,0001
	10-4:PIME4 vs. 10-4:PFIG1	-0.9246	-1,424 to -0,4254	Yes	****	<0,0001															0.0001:DIX18 (PMFA1) vs. 0.0001:DIX22 (PHPF1)	0.8171	0,3179 to 1,316	Yes	****	<0,0001					10-4:PIME4 vs. 10-4:PFIG1	-0.0111	-0,1303 to 0,1081	No	ns	>0,9999					0.0001:DIX18 (PMFA1) vs. 0.0001:DIX22 (PHPF1)	0.7173	0,2590 to 1,176	Yes	****	<0,0001
	10-4:PIME4 vs. 10-4:PAGA2	-1.27	-1,770 to -0,7713	Yes	****	<0,0001															0.0001:DIX18 (PMFA1) vs. 0.0001:DIX23 (PCSS1)	0.6681	0,1689 to 1,167	Yes	****	<0,0001					10-4:PIME4 vs. 10-4:PAGA2	0.06393	-0,05530 to 0,1832	No	ns	0.9994					0.0001:DIX18 (PMFA1) vs. 0.0001:DIX23 (PCSS1)	1.488	1,030 to 1,947	Yes	****	<0,0001
	10-4:PIME4 vs. 10-4:PFUS1	-1.466	-1,965 to -0,9669	Yes	****	<0,0001															0.0001:DIX18 (PMFA1) vs. 0.0001:DIX24 (PFUS1)	-0.7889	-1,288 to -0,2897	Yes	****	<0,0001					10-4:PIME4 vs. 10-4:PFUS1	-0.02113	-0,1404 to 0,09810	No	ns	>0,9999					0.0001:DIX18 (PMFA1) vs. 0.0001:DIX24 (PFUS1)	-0.1387	-0,5971 to 0,3197	No	ns	>0,9999
	10-4:PIME4 vs. 10-4:PMFA2	-2.593	-3,092 to -2,093	Yes	****	<0,0001															0.0001:DIX18 (PMFA1) vs. 0.0001:DIX25 (PFIG1)	-0.7134	-1,213 to -0,2142	Yes	****	<0,0001					10-4:PIME4 vs. 10-4:PMFA2	0.09971	-0,01952 to 0,2189	No	ns	0.3797					0.0001:DIX18 (PMFA1) vs. 0.0001:DIX25 (PFIG1)	0.3929	-0,06551 to 0,8513	No	ns	0.3109
	10-4:PIME4 vs. 10-3:PCSS1	-0.371	-1,057 to 0,3151	No	ns	0.9993															0.0001:DIX18 (PMFA1) vs. 0.001:DIX17 (PMFA2)	-0.5706	-1,257 to 0,1155	No	ns	0.396					10-4:PIME4 vs. 10-3:PCSS1	-0.0944	-0,2583 to 0,06947	No	ns	0.9962					0.0001:DIX18 (PMFA1) vs. 0.001:DIX17 (PMFA2)	-1.844	-2,474 to -1,214	Yes	****	<0,0001
	10-4:PIME4 vs. 10-3:PIME4	-0.5853	-1,056 to -0,1146	Yes	***	0.0006															0.0001:DIX18 (PMFA1) vs. 0.001:DIX18 (PMFA1)	-0.5853	-1,056 to -0,1146	Yes	***	0.0006					10-4:PIME4 vs. 10-3:PIME4	-0.1268	-0,2392 to -0,01441	Yes	**	0.0057					0.0001:DIX18 (PMFA1) vs. 0.001:DIX18 (PMFA1)	-0.4584	-0,8906 to -0,02627	Yes	*	0.0189
	10-4:PIME4 vs. 10-3:PHPF1	-1.052	-1,738 to -0,3660	Yes	****	<0,0001															0.0001:DIX18 (PMFA1) vs. 0.001:DIX19 (PAGA2)	-0.8825	-1,569 to -0,1964	Yes	***	0.0002					10-4:PIME4 vs. 10-3:PHPF1	-0.004658	-0,1685 to 0,1592	No	ns	>0,9999					0.0001:DIX18 (PMFA1) vs. 0.001:DIX19 (PAGA2)	-0.4865	-1,117 to 0,1435	No	ns	0.6211
	10-4:PIME4 vs. 10-3:PYCL076W	-1.232	-1,918 to -0,5457	Yes	****	<0,0001															0.0001:DIX18 (PMFA1) vs. 0.001:DIX20 (PYCL076W)	-1.136	-1,822 to -0,4499	Yes	****	<0,0001					10-4:PIME4 vs. 10-3:PYCL076W	-0.09504	-0,2589 to 0,06883	No	ns	0.9955					0.0001:DIX18 (PMFA1) vs. 0.001:DIX20 (PYCL076W)	0.1696	-0,4604 to 0,7996	No	ns	>0,9999
	10-4:PIME4 vs. 10-3:PMFA1	-1.797	-2,483 to -1,111	Yes	****	<0,0001															0.0001:DIX18 (PMFA1) vs. 0.001:DIX21 (PIME4)	-0.5068	-1,193 to 0,1793	No	ns	0.7445					10-4:PIME4 vs. 10-3:PMFA1	-0.03261	-0,1965 to 0,1313	No	ns	>0,9999					0.0001:DIX18 (PMFA1) vs. 0.001:DIX21 (PIME4)	0.8479	0,2179 to 1,478	Yes	****	<0,0001
	10-4:PIME4 vs. 10-3:PFIG1	-1.51	-2,196 to -0,8238	Yes	****	<0,0001															0.0001:DIX18 (PMFA1) vs. 0.001:DIX22 (PHPF1)	0.2318	-0,4543 to 0,9179	No	ns	>0,9999					10-4:PIME4 vs. 10-3:PFIG1	-0.1379	-0,3018 to 0,02594	No	ns	0.3611					0.0001:DIX18 (PMFA1) vs. 0.001:DIX22 (PHPF1)	0.2589	-0,3711 to 0,8889	No	ns	>0,9999
	10-4:PIME4 vs. 10-3:PAGA2	-1.856	-2,542 to -1,170	Yes	****	<0,0001															0.0001:DIX18 (PMFA1) vs. 0.001:DIX23 (PCSS1)	0.08281	-0,6033 to 0,7689	No	ns	>0,9999					10-4:PIME4 vs. 10-3:PAGA2	-0.0629	-0,2268 to 0,1010	No	ns	>0,9999					0.0001:DIX18 (PMFA1) vs. 0.001:DIX23 (PCSS1)	1.03	0,3997 to 1,660	Yes	****	<0,0001
	10-4:PIME4 vs. 10-3:PFUS1	-2.051	-2,737 to -1,365	Yes	****	<0,0001															0.0001:DIX18 (PMFA1) vs. 0.001:DIX24 (PFUS1)	-1.374	-2,060 to -0,6881	Yes	****	<0,0001					10-4:PIME4 vs. 10-3:PFUS1	-0.148	-0,3118 to 0,01591	No	ns	0.1877					0.0001:DIX18 (PMFA1) vs. 0.001:DIX24 (PFUS1)	-0.5971	-1,227 to 0,03288	No	ns	0.1059
	10-4:PIME4 vs. 10-3:PMFA2	-3.178	-3,864 to -2,492	Yes	****	<0,0001															0.0001:DIX18 (PMFA1) vs. 0.001:DIX25 (PFIG1)	-1.299	-1,985 to -0,6126	Yes	****	<0,0001					10-4:PIME4 vs. 10-3:PMFA2	-0.02712	-0,1910 to 0,1368	No	ns	>0,9999					0.0001:DIX18 (PMFA1) vs. 0.001:DIX25 (PFIG1)	-0.06557	-0,6956 to 0,5644	No	ns	>0,9999
	10-4:PIME4 vs. 10-2:PCSS1	-1.059	-1,745 to -0,3727	Yes	****	<0,0001															0.0001:DIX18 (PMFA1) vs. 0.01:DIX17 (PMFA2)	-1.258	-1,944 to -0,5722	Yes	****	<0,0001					10-4:PIME4 vs. 10-2:PCSS1	-0.4014	-0,5653 to -0,2376	Yes	****	<0,0001					0.0001:DIX18 (PMFA1) vs. 0.01:DIX17 (PMFA2)	-2.225	-2,855 to -1,595	Yes	****	<0,0001
	10-4:PIME4 vs. 10-2:PIME4	-1.273	-1,744 to -0,8024	Yes	****	<0,0001															0.0001:DIX18 (PMFA1) vs. 0.01:DIX18 (PMFA1)	-1.273	-1,744 to -0,8024	Yes	****	<0,0001					10-4:PIME4 vs. 10-2:PIME4	-0.4339	-0,5463 to -0,3214	Yes	****	<0,0001					0.0001:DIX18 (PMFA1) vs. 0.01:DIX18 (PMFA1)	-0.8392	-1,271 to -0,4070	Yes	****	<0,0001
	10-4:PIME4 vs. 10-2:PHPF1	-1.74	-2,426 to -1,054	Yes	****	<0,0001															0.0001:DIX18 (PMFA1) vs. 0.01:DIX19 (PAGA2)	-1.57	-2,256 to -0,8842	Yes	****	<0,0001					10-4:PIME4 vs. 10-2:PHPF1	-0.3117	-0,4756 to -0,1478	Yes	****	<0,0001					0.0001:DIX18 (PMFA1) vs. 0.01:DIX19 (PAGA2)	-0.8672	-1,497 to -0,2372	Yes	****	<0,0001
	10-4:PIME4 vs. 10-2:PYCL076W	-1.919	-2,606 to -1,233	Yes	****	<0,0001															0.0001:DIX18 (PMFA1) vs. 0.01:DIX20 (PYCL076W)	-1.824	-2,510 to -1,138	Yes	****	<0,0001					10-4:PIME4 vs. 10-2:PYCL076W	-0.4021	-0,5659 to -0,2382	Yes	****	<0,0001					0.0001:DIX18 (PMFA1) vs. 0.01:DIX20 (PYCL076W)	-0.2111	-0,8411 to 0,4189	No	ns	>0,9999
	10-4:PIME4 vs. 10-2:PMFA1	-2.485	-3,171 to -1,799	Yes	****	<0,0001															0.0001:DIX18 (PMFA1) vs. 0.01:DIX21 (PIME4)	-1.194	-1,881 to -0,5084	Yes	****	<0,0001					10-4:PIME4 vs. 10-2:PMFA1	-0.3396	-0,5035 to -0,1758	Yes	****	<0,0001					0.0001:DIX18 (PMFA1) vs. 0.01:DIX21 (PIME4)	0.4672	-0,1628 to 1,097	No	ns	0.7343
	10-4:PIME4 vs. 10-2:PFIG1	-2.198	-2,884 to -1,511	Yes	****	<0,0001															0.0001:DIX18 (PMFA1) vs. 0.01:DIX22 (PHPF1)	-0.4559	-1,142 to 0,2301	No	ns	0.9332					10-4:PIME4 vs. 10-2:PFIG1	-0.445	-0,6088 to -0,2811	Yes	****	<0,0001					0.0001:DIX18 (PMFA1) vs. 0.01:DIX22 (PHPF1)	-0.1218	-0,7518 to 0,5082	No	ns	>0,9999
	10-4:PIME4 vs. 10-2:PAGA2	-2.543	-3,230 to -1,857	Yes	****	<0,0001															0.0001:DIX18 (PMFA1) vs. 0.01:DIX23 (PCSS1)	-0.6049	-1,291 to 0,08114	No	ns	0.2395					10-4:PIME4 vs. 10-2:PAGA2	-0.3699	-0,5338 to -0,2061	Yes	****	<0,0001					0.0001:DIX18 (PMFA1) vs. 0.01:DIX23 (PCSS1)	0.649	0,01903 to 1,279	Yes	*	0.0312
	10-4:PIME4 vs. 10-2:PFUS1	-2.739	-3,425 to -2,053	Yes	****	<0,0001															0.0001:DIX18 (PMFA1) vs. 0.01:DIX24 (PFUS1)	-2.062	-2,748 to -1,376	Yes	****	<0,0001					10-4:PIME4 vs. 10-2:PFUS1	-0.455	-0,6189 to -0,2911	Yes	****	<0,0001					0.0001:DIX18 (PMFA1) vs. 0.01:DIX24 (PFUS1)	-0.9778	-1,608 to -0,3478	Yes	****	<0,0001
	10-4:PIME4 vs. 10-2:PMFA2	-3.866	-4,552 to -3,179	Yes	****	<0,0001															0.0001:DIX18 (PMFA1) vs. 0.01:DIX25 (PFIG1)	-1.986	-2,672 to -1,300	Yes	****	<0,0001					10-4:PIME4 vs. 10-2:PMFA2	-0.3341	-0,4980 to -0,1703	Yes	****	<0,0001					0.0001:DIX18 (PMFA1) vs. 0.01:DIX25 (PFIG1)	-0.4463	-1,076 to 0,1837	No	ns	0.8385
	10-4:PIME4 vs. 10-1:Neg.Con.	-0.6024	-1,383 to 0,1781	No	ns	0.6226															0.0001:DIX18 (PMFA1) vs. 0.1:DIX14 (Neg.Con.)	-0.7668	-1,547 to 0,01368	No	ns	0.0649					10-4:PIME4 vs. 10-1:Neg.Con.	-0.4417	-0,6281 to -0,2553	Yes	****	<0,0001					0.0001:DIX18 (PMFA1) vs. 0.1:DIX14 (Neg.Con.)	1.146	0,4289 to 1,862	Yes	****	<0,0001
	10-4:PIME4 vs. 10-1:PPGK1	-2.93	-3,710 to -2,149	Yes	****	<0,0001															0.0001:DIX18 (PMFA1) vs. 0.1:DIX27 (PPGK1)	-0.7599	-1,540 to 0,02057	No	ns	0.0738					10-4:PIME4 vs. 10-1:PPGK1	-0.4128	-0,5992 to -0,2263	Yes	****	<0,0001					0.0001:DIX18 (PMFA1) vs. 0.1:DIX27 (PPGK1)	-1.211	-1,927 to -0,4939	Yes	****	<0,0001
	10-4:PIME4 vs. 10-1:PTDH3	-3.874	-4,654 to -3,094	Yes	****	<0,0001															0.0001:DIX18 (PMFA1) vs. 0.1:DIX28 (PTDH3)	-0.7847	-1,565 to -0,004274	Yes	*	0.046					10-4:PIME4 vs. 10-1:PTDH3	-0.4416	-0,6281 to -0,2552	Yes	****	<0,0001					0.0001:DIX18 (PMFA1) vs. 0.1:DIX28 (PTDH3)	-2.126	-2,843 to -1,409	Yes	****	<0,0001
	10-4:PIME4 vs. 10-1:PCSS1	-1.185	-1,858 to -0,5130	Yes	****	<0,0001															0.0001:DIX18 (PMFA1) vs. 0.1:DIX17 (PMFA2)	-1.385	-2,058 to -0,7125	Yes	****	<0,0001					10-4:PIME4 vs. 10-1:PCSS1	-0.526	-0,6866 to -0,3654	Yes	****	<0,0001					0.0001:DIX18 (PMFA1) vs. 0.1:DIX17 (PMFA2)	-2.227	-2,845 to -1,610	Yes	****	<0,0001
	10-4:PIME4 vs. 10-1:PIME4	-1.4	-1,850 to -0,9491	Yes	****	<0,0001															0.0001:DIX18 (PMFA1) vs. 0.1:DIX18 (PMFA1)	-1.4	-1,850 to -0,9491	Yes	****	<0,0001					10-4:PIME4 vs. 10-1:PIME4	-0.5584	-0,6660 to -0,4508	Yes	****	<0,0001					0.0001:DIX18 (PMFA1) vs. 0.1:DIX18 (PMFA1)	-0.8413	-1,255 to -0,4275	Yes	****	<0,0001
	10-4:PIME4 vs. 10-1:PHPF1	-1.867	-2,539 to -1,194	Yes	****	<0,0001															0.0001:DIX18 (PMFA1) vs. 0.1:DIX19 (PAGA2)	-1.697	-2,369 to -1,024	Yes	****	<0,0001					10-4:PIME4 vs. 10-1:PHPF1	-0.4362	-0,5969 to -0,2756	Yes	****	<0,0001					0.0001:DIX18 (PMFA1) vs. 0.1:DIX19 (PAGA2)	-0.8694	-1,487 to -0,2519	Yes	****	<0,0001
	10-4:PIME4 vs. 10-1:PYCL076W	-2.046	-2,719 to -1,374	Yes	****	<0,0001															0.0001:DIX18 (PMFA1) vs. 0.1:DIX20 (PYCL076W)	-1.95	-2,623 to -1,278	Yes	****	<0,0001					10-4:PIME4 vs. 10-1:PYCL076W	-0.5266	-0,6872 to -0,3660	Yes	****	<0,0001					0.0001:DIX18 (PMFA1) vs. 0.1:DIX20 (PYCL076W)	-0.2132	-0,8307 to 0,4043	No	ns	>0,9999
	10-4:PIME4 vs. 10-1:PMFA1	-2.612	-3,284 to -1,939	Yes	****	<0,0001															0.0001:DIX18 (PMFA1) vs. 0.1:DIX21 (PIME4)	-1.321	-1,994 to -0,6487	Yes	****	<0,0001					10-4:PIME4 vs. 10-1:PMFA1	-0.4642	-0,6248 to -0,3036	Yes	****	<0,0001					0.0001:DIX18 (PMFA1) vs. 0.1:DIX21 (PIME4)	0.465	-0,1525 to 1,083	No	ns	0.6933
	10-4:PIME4 vs. 10-1:PFIG1	-2.324	-2,997 to -1,652	Yes	****	<0,0001															0.0001:DIX18 (PMFA1) vs. 0.1:DIX22 (PHPF1)	-0.5826	-1,255 to 0,08984	No	ns	0.2825					10-4:PIME4 vs. 10-1:PFIG1	-0.5695	-0,7301 to -0,4089	Yes	****	<0,0001					0.0001:DIX18 (PMFA1) vs. 0.1:DIX22 (PHPF1)	-0.124	-0,7415 to 0,4936	No	ns	>0,9999
	10-4:PIME4 vs. 10-1:PAGA2	-2.67	-3,343 to -1,998	Yes	****	<0,0001															0.0001:DIX18 (PMFA1) vs. 0.1:DIX23 (PCSS1)	-0.7316	-1,404 to -0,05915	Yes	*	0.0118					10-4:PIME4 vs. 10-1:PAGA2	-0.4945	-0,6551 to -0,3339	Yes	****	<0,0001					0.0001:DIX18 (PMFA1) vs. 0.1:DIX23 (PCSS1)	0.6469	0,02935 to 1,264	Yes	*	0.0235
	10-4:PIME4 vs. 10-1:PFUS1	-2.866	-3,538 to -2,193	Yes	****	<0,0001															0.0001:DIX18 (PMFA1) vs. 0.1:DIX24 (PFUS1)	-2.189	-2,861 to -1,516	Yes	****	<0,0001					10-4:PIME4 vs. 10-1:PFUS1	-0.5795	-0,7402 to -0,4189	Yes	****	<0,0001					0.0001:DIX18 (PMFA1) vs. 0.1:DIX24 (PFUS1)	-0.98	-1,597 to -0,3625	Yes	****	<0,0001
	10-4:PIME4 vs. 10-1:PMFA2	-3.992	-4,665 to -3,320	Yes	****	<0,0001															0.0001:DIX18 (PMFA1) vs. 0.1:DIX25 (PFIG1)	-2.113	-2,786 to -1,441	Yes	****	<0,0001					10-4:PIME4 vs. 10-1:PMFA2	-0.4587	-0,6193 to -0,2981	Yes	****	<0,0001					0.0001:DIX18 (PMFA1) vs. 0.1:DIX25 (PFIG1)	-0.4484	-1,066 to 0,1691	No	ns	0.7857
	10-4:PIME4 vs. 100:PCSS1	-1.348	-2,034 to -0,6623	Yes	****	<0,0001															0.0001:DIX18 (PMFA1) vs. 1:DIX17 (PMFA2)	-1.548	-2,234 to -0,8619	Yes	****	<0,0001					10-4:PIME4 vs. 100:PCSS1	-0.5688	-0,7327 to -0,4050	Yes	****	<0,0001					0.0001:DIX18 (PMFA1) vs. 1:DIX17 (PMFA2)	-2.347	-2,977 to -1,717	Yes	****	<0,0001
	10-4:PIME4 vs. 100:PIME4	-1.563	-2,033 to -1,092	Yes	****	<0,0001															0.0001:DIX18 (PMFA1) vs. 1:DIX18 (PMFA1)	-1.563	-2,033 to -1,092	Yes	****	<0,0001					10-4:PIME4 vs. 100:PIME4	-0.6013	-0,7137 to -0,4888	Yes	****	<0,0001					0.0001:DIX18 (PMFA1) vs. 1:DIX18 (PMFA1)	-0.9614	-1,394 to -0,5293	Yes	****	<0,0001
	10-4:PIME4 vs. 100:PHPF1	-2.03	-2,716 to -1,343	Yes	****	<0,0001															0.0001:DIX18 (PMFA1) vs. 1:DIX19 (PAGA2)	-1.86	-2,546 to -1,174	Yes	****	<0,0001					10-4:PIME4 vs. 100:PHPF1	-0.4791	-0,6430 to -0,3152	Yes	****	<0,0001					0.0001:DIX18 (PMFA1) vs. 1:DIX19 (PAGA2)	-0.9895	-1,619 to -0,3595	Yes	****	<0,0001
	10-4:PIME4 vs. 100:PYCL076W	-2.209	-2,895 to -1,523	Yes	****	<0,0001															0.0001:DIX18 (PMFA1) vs. 1:DIX20 (PYCL076W)	-2.113	-2,800 to -1,427	Yes	****	<0,0001					10-4:PIME4 vs. 100:PYCL076W	-0.5695	-0,7333 to -0,4056	Yes	****	<0,0001					0.0001:DIX18 (PMFA1) vs. 1:DIX20 (PYCL076W)	-0.3333	-0,9633 to 0,2966	No	ns	0.9996
	10-4:PIME4 vs. 100:PMFA1	-2.775	-3,461 to -2,089	Yes	****	<0,0001															0.0001:DIX18 (PMFA1) vs. 1:DIX21 (PIME4)	-1.484	-2,170 to -0,7981	Yes	****	<0,0001					10-4:PIME4 vs. 100:PMFA1	-0.507	-0,6709 to -0,3432	Yes	****	<0,0001					0.0001:DIX18 (PMFA1) vs. 1:DIX21 (PIME4)	0.3449	-0,2851 to 0,9749	No	ns	0.999
	10-4:PIME4 vs. 100:PFIG1	-2.487	-3,173 to -1,801	Yes	****	<0,0001															0.0001:DIX18 (PMFA1) vs. 1:DIX22 (PHPF1)	-0.7456	-1,432 to -0,05955	Yes	*	0.0121					10-4:PIME4 vs. 100:PFIG1	-0.6124	-0,7762 to -0,4485	Yes	****	<0,0001					0.0001:DIX18 (PMFA1) vs. 1:DIX22 (PHPF1)	-0.2441	-0,8741 to 0,3859	No	ns	>0,9999
	10-4:PIME4 vs. 100:PAGA2	-2.833	-3,519 to -2,147	Yes	****	<0,0001															0.0001:DIX18 (PMFA1) vs. 1:DIX23 (PCSS1)	-0.8946	-1,581 to -0,2085	Yes	***	0.0002					10-4:PIME4 vs. 100:PAGA2	-0.5373	-0,7012 to -0,3735	Yes	****	<0,0001					0.0001:DIX18 (PMFA1) vs. 1:DIX23 (PCSS1)	0.5267	-0,1032 to 1,157	No	ns	0.3803
	10-4:PIME4 vs. 100:PFUS1	-3.029	-3,715 to -2,343	Yes	****	<0,0001															0.0001:DIX18 (PMFA1) vs. 1:DIX24 (PFUS1)	-2.352	-3,038 to -1,666	Yes	****	<0,0001					10-4:PIME4 vs. 100:PFUS1	-0.6224	-0,7863 to -0,4585	Yes	****	<0,0001					0.0001:DIX18 (PMFA1) vs. 1:DIX24 (PFUS1)	-1.1	-1,730 to -0,4701	Yes	****	<0,0001
	10-4:PIME4 vs. 100:PMFA2	-4.155	-4,841 to -3,469	Yes	****	<0,0001															0.0001:DIX18 (PMFA1) vs. 1:DIX25 (PFIG1)	-2.276	-2,962 to -1,590	Yes	****	<0,0001					10-4:PIME4 vs. 100:PMFA2	-0.5015	-0,6654 to -0,3377	Yes	****	<0,0001					0.0001:DIX18 (PMFA1) vs. 1:DIX25 (PFIG1)	-0.5686	-1,199 to 0,06144	No	ns	0.1887
	10-4:PIME4 vs. 101:PCSS1	-1.288	-1,974 to -0,6018	Yes	****	<0,0001															0.0001:DIX18 (PMFA1) vs. 10:DIX17 (PMFA2)	-1.487	-2,174 to -0,8014	Yes	****	<0,0001					10-4:PIME4 vs. 101:PCSS1	-0.4946	-0,6584 to -0,3307	Yes	****	<0,0001					0.0001:DIX18 (PMFA1) vs. 10:DIX17 (PMFA2)	-2.361	-2,991 to -1,731	Yes	****	<0,0001
	10-4:PIME4 vs. 101:PIME4	-1.502	-1,973 to -1,032	Yes	****	<0,0001															0.0001:DIX18 (PMFA1) vs. 10:DIX18 (PMFA1)	-1.502	-1,973 to -1,032	Yes	****	<0,0001					10-4:PIME4 vs. 101:PIME4	-0.527	-0,6394 to -0,4146	Yes	****	<0,0001					0.0001:DIX18 (PMFA1) vs. 10:DIX18 (PMFA1)	-0.9752	-1,407 to -0,5430	Yes	****	<0,0001
	10-4:PIME4 vs. 101:PHPF1	-1.969	-2,655 to -1,283	Yes	****	<0,0001															0.0001:DIX18 (PMFA1) vs. 10:DIX19 (PAGA2)	-1.799	-2,485 to -1,113	Yes	****	<0,0001					10-4:PIME4 vs. 101:PHPF1	-0.4048	-0,5687 to -0,2410	Yes	****	<0,0001					0.0001:DIX18 (PMFA1) vs. 10:DIX19 (PAGA2)	-1.003	-1,633 to -0,3733	Yes	****	<0,0001
	10-4:PIME4 vs. 101:PYCL076W	-2.149	-2,835 to -1,463	Yes	****	<0,0001															0.0001:DIX18 (PMFA1) vs. 10:DIX20 (PYCL076W)	-2.053	-2,739 to -1,367	Yes	****	<0,0001					10-4:PIME4 vs. 101:PYCL076W	-0.4952	-0,6591 to -0,3313	Yes	****	<0,0001					0.0001:DIX18 (PMFA1) vs. 10:DIX20 (PYCL076W)	-0.3471	-0,9771 to 0,2829	No	ns	0.9988
	10-4:PIME4 vs. 101:PMFA1	-2.714	-3,400 to -2,028	Yes	****	<0,0001															0.0001:DIX18 (PMFA1) vs. 10:DIX21 (PIME4)	-1.424	-2,110 to -0,7376	Yes	****	<0,0001					10-4:PIME4 vs. 101:PMFA1	-0.4328	-0,5967 to -0,2689	Yes	****	<0,0001					0.0001:DIX18 (PMFA1) vs. 10:DIX21 (PIME4)	0.3311	-0,2989 to 0,9611	No	ns	0.9997
	10-4:PIME4 vs. 101:PFIG1	-2.427	-3,113 to -1,741	Yes	****	<0,0001															0.0001:DIX18 (PMFA1) vs. 10:DIX22 (PHPF1)	-0.6851	-1,371 to 0,0009520	No	ns	0.0511					10-4:PIME4 vs. 101:PFIG1	-0.5381	-0,7020 to -0,3742	Yes	****	<0,0001					0.0001:DIX18 (PMFA1) vs. 10:DIX22 (PHPF1)	-0.2578	-0,8878 to 0,3721	No	ns	>0,9999
	10-4:PIME4 vs. 101:PAGA2	-2.773	-3,459 to -2,087	Yes	****	<0,0001															0.0001:DIX18 (PMFA1) vs. 10:DIX23 (PCSS1)	-0.8341	-1,520 to -0,1480	Yes	**	0.0011					10-4:PIME4 vs. 101:PAGA2	-0.4631	-0,6269 to -0,2992	Yes	****	<0,0001					0.0001:DIX18 (PMFA1) vs. 10:DIX23 (PCSS1)	0.513	-0,1170 to 1,143	No	ns	0.4594
	10-4:PIME4 vs. 101:PFUS1	-2.968	-3,654 to -2,282	Yes	****	<0,0001															0.0001:DIX18 (PMFA1) vs. 10:DIX24 (PFUS1)	-2.291	-2,977 to -1,605	Yes	****	<0,0001					10-4:PIME4 vs. 101:PFUS1	-0.5481	-0,7120 to -0,3843	Yes	****	<0,0001					0.0001:DIX18 (PMFA1) vs. 10:DIX24 (PFUS1)	-1.114	-1,744 to -0,4839	Yes	****	<0,0001
	10-4:PIME4 vs. 101:PMFA2	-4.095	-4,781 to -3,409	Yes	****	<0,0001															0.0001:DIX18 (PMFA1) vs. 10:DIX25 (PFIG1)	-2.216	-2,902 to -1,530	Yes	****	<0,0001					10-4:PIME4 vs. 101:PMFA2	-0.4273	-0,5912 to -0,2634	Yes	****	<0,0001					0.0001:DIX18 (PMFA1) vs. 10:DIX25 (PFIG1)	-0.5823	-1,212 to 0,04769	No	ns	0.1442
	10-4:PIME4 vs. 102:Neg.Con.	-0.6403	-1,421 to 0,1401	No	ns	0.4365															0.0001:DIX18 (PMFA1) vs. 100:DIX14 (Neg.Con.)	-0.8047	-1,585 to -0,02424	Yes	*	0.0308					10-4:PIME4 vs. 102:Neg.Con.	-0.4286	-0,6150 to -0,2422	Yes	****	<0,0001					0.0001:DIX18 (PMFA1) vs. 100:DIX14 (Neg.Con.)	1.095	0,3780 to 1,811	Yes	****	<0,0001
	10-4:PIME4 vs. 102:PPGK1	-2.968	-3,748 to -2,187	Yes	****	<0,0001															0.0001:DIX18 (PMFA1) vs. 100:DIX27 (PPGK1)	-0.7978	-1,578 to -0,01735	Yes	*	0.0354					10-4:PIME4 vs. 102:PPGK1	-0.3997	-0,5861 to -0,2133	Yes	****	<0,0001					0.0001:DIX18 (PMFA1) vs. 100:DIX27 (PPGK1)	-1.262	-1,978 to -0,5449	Yes	****	<0,0001
	10-4:PIME4 vs. 102:PTDH3	-3.912	-4,692 to -3,131	Yes	****	<0,0001															0.0001:DIX18 (PMFA1) vs. 100:DIX28 (PTDH3)	-0.8227	-1,603 to -0,04219	Yes	*	0.0211					10-4:PIME4 vs. 102:PTDH3	-0.4286	-0,6150 to -0,2422	Yes	****	<0,0001					0.0001:DIX18 (PMFA1) vs. 100:DIX28 (PTDH3)	-2.177	-2,894 to -1,460	Yes	****	<0,0001
	10-4:PIME4 vs. 102:PCSS1	-1.223	-1,896 to -0,5509	Yes	****	<0,0001															0.0001:DIX18 (PMFA1) vs. 100:DIX17 (PMFA2)	-1.423	-2,095 to -0,7504	Yes	****	<0,0001					10-4:PIME4 vs. 102:PCSS1	-0.5129	-0,6735 to -0,3523	Yes	****	<0,0001					0.0001:DIX18 (PMFA1) vs. 100:DIX17 (PMFA2)	-2.278	-2,896 to -1,661	Yes	****	<0,0001
	10-4:PIME4 vs. 102:PIME4	-1.438	-1,888 to -0,9870	Yes	****	<0,0001															0.0001:DIX18 (PMFA1) vs. 100:DIX18 (PMFA1)	-1.438	-1,888 to -0,9870	Yes	****	<0,0001					10-4:PIME4 vs. 102:PIME4	-0.5453	-0,6530 to -0,4377	Yes	****	<0,0001					0.0001:DIX18 (PMFA1) vs. 100:DIX18 (PMFA1)	-0.8923	-1,306 to -0,4785	Yes	****	<0,0001
	10-4:PIME4 vs. 102:PHPF1	-1.904	-2,577 to -1,232	Yes	****	<0,0001															0.0001:DIX18 (PMFA1) vs. 100:DIX19 (PAGA2)	-1.735	-2,407 to -1,062	Yes	****	<0,0001					10-4:PIME4 vs. 102:PHPF1	-0.4232	-0,5838 to -0,2625	Yes	****	<0,0001					0.0001:DIX18 (PMFA1) vs. 100:DIX19 (PAGA2)	-0.9204	-1,538 to -0,3028	Yes	****	<0,0001
	10-4:PIME4 vs. 102:PYCL076W	-2.084	-2,757 to -1,412	Yes	****	<0,0001															0.0001:DIX18 (PMFA1) vs. 100:DIX20 (PYCL076W)	-1.988	-2,661 to -1,316	Yes	****	<0,0001					10-4:PIME4 vs. 102:PYCL076W	-0.5136	-0,6742 to -0,3529	Yes	****	<0,0001					0.0001:DIX18 (PMFA1) vs. 100:DIX20 (PYCL076W)	-0.2642	-0,8817 to 0,3533	No	ns	>0,9999
	10-4:PIME4 vs. 102:PMFA1	-2.65	-3,322 to -1,977	Yes	****	<0,0001															0.0001:DIX18 (PMFA1) vs. 100:DIX21 (PIME4)	-1.359	-2,032 to -0,6866	Yes	****	<0,0001					10-4:PIME4 vs. 102:PMFA1	-0.4511	-0,6118 to -0,2905	Yes	****	<0,0001					0.0001:DIX18 (PMFA1) vs. 100:DIX21 (PIME4)	0.414	-0,2035 to 1,032	No	ns	0.9234
	10-4:PIME4 vs. 102:PFIG1	-2.362	-3,035 to -1,690	Yes	****	<0,0001															0.0001:DIX18 (PMFA1) vs. 100:DIX22 (PHPF1)	-0.6206	-1,293 to 0,05192	No	ns	0.147					10-4:PIME4 vs. 102:PFIG1	-0.5564	-0,7171 to -0,3958	Yes	****	<0,0001					0.0001:DIX18 (PMFA1) vs. 100:DIX22 (PHPF1)	-0.175	-0,7925 to 0,4426	No	ns	>0,9999
	10-4:PIME4 vs. 102:PAGA2	-2.708	-3,381 to -2,036	Yes	****	<0,0001															0.0001:DIX18 (PMFA1) vs. 100:DIX23 (PCSS1)	-0.7696	-1,442 to -0,09707	Yes	**	0.0043					10-4:PIME4 vs. 102:PAGA2	-0.4814	-0,6420 to -0,3208	Yes	****	<0,0001					0.0001:DIX18 (PMFA1) vs. 100:DIX23 (PCSS1)	0.5959	-0,02164 to 1,213	No	ns	0.0835
	10-4:PIME4 vs. 102:PFUS1	-2.904	-3,576 to -2,231	Yes	****	<0,0001															0.0001:DIX18 (PMFA1) vs. 100:DIX24 (PFUS1)	-2.227	-2,899 to -1,554	Yes	****	<0,0001					10-4:PIME4 vs. 102:PFUS1	-0.5665	-0,7271 to -0,4059	Yes	****	<0,0001					0.0001:DIX18 (PMFA1) vs. 100:DIX24 (PFUS1)	-1.031	-1,648 to -0,4134	Yes	****	<0,0001
	10-4:PIME4 vs. 102:PMFA2	-4.03	-4,703 to -3,358	Yes	****	<0,0001															0.0001:DIX18 (PMFA1) vs. 100:DIX25 (PFIG1)	-2.151	-2,824 to -1,479	Yes	****	<0,0001					10-4:PIME4 vs. 102:PMFA2	-0.4456	-0,6063 to -0,2850	Yes	****	<0,0001					0.0001:DIX18 (PMFA1) vs. 100:DIX25 (PFIG1)	-0.4994	-1,117 to 0,1181	No	ns	0.4803
	10-4:PHPF1 vs. 10-4:PYCL076W	-0.1796	-0,6788 to 0,3196	No	ns	>0,9999															0.0001:DIX19 (PAGA2) vs. 0.0001:DIX20 (PYCL076W)	-0.2535	-0,7527 to 0,2457	No	ns	0.9999					10-4:PHPF1 vs. 10-4:PYCL076W	-0.09038	-0,2096 to 0,02885	No	ns	0.6749					0.0001:DIX19 (PAGA2) vs. 0.0001:DIX20 (PYCL076W)	0.6561	0,1978 to 1,115	Yes	****	<0,0001
	10-4:PHPF1 vs. 10-4:PMFA1	-0.7453	-1,244 to -0,2461	Yes	****	<0,0001															0.0001:DIX19 (PAGA2) vs. 0.0001:DIX21 (PIME4)	0.3757	-0,1235 to 0,8749	No	ns	0.6946					10-4:PHPF1 vs. 10-4:PMFA1	-0.02796	-0,1472 to 0,09128	No	ns	>0,9999					0.0001:DIX19 (PAGA2) vs. 0.0001:DIX21 (PIME4)	1.334	0,8760 to 1,793	Yes	****	<0,0001
	10-4:PHPF1 vs. 10-4:PFIG1	-0.4577	-0,9569 to 0,04146	No	ns	0.1582															0.0001:DIX19 (PAGA2) vs. 0.0001:DIX22 (PHPF1)	1.114	0,6151 to 1,613	Yes	****	<0,0001					10-4:PHPF1 vs. 10-4:PFIG1	-0.1333	-0,2525 to -0,01404	Yes	**	0.007					0.0001:DIX19 (PAGA2) vs. 0.0001:DIX22 (PHPF1)	0.7454	0,2870 to 1,204	Yes	****	<0,0001
	10-4:PHPF1 vs. 10-4:PAGA2	-0.8036	-1,303 to -0,3044	Yes	****	<0,0001															0.0001:DIX19 (PAGA2) vs. 0.0001:DIX23 (PCSS1)	0.9653	0,4661 to 1,464	Yes	****	<0,0001					10-4:PHPF1 vs. 10-4:PAGA2	-0.05824	-0,1775 to 0,06099	No	ns	>0,9999					0.0001:DIX19 (PAGA2) vs. 0.0001:DIX23 (PCSS1)	1.516	1,058 to 1,975	Yes	****	<0,0001
	10-4:PHPF1 vs. 10-4:PFUS1	-0.9993	-1,499 to -0,5001	Yes	****	<0,0001															0.0001:DIX19 (PAGA2) vs. 0.0001:DIX24 (PFUS1)	-0.4917	-0,9909 to 0,007513	No	ns	0.0626					10-4:PHPF1 vs. 10-4:PFUS1	-0.1433	-0,2625 to -0,02407	Yes	**	0.0014					0.0001:DIX19 (PAGA2) vs. 0.0001:DIX24 (PFUS1)	-0.1106	-0,5690 to 0,3478	No	ns	>0,9999
	10-4:PHPF1 vs. 10-4:PMFA2	-2.126	-2,625 to -1,626	Yes	****	<0,0001															0.0001:DIX19 (PAGA2) vs. 0.0001:DIX25 (PFIG1)	-0.4162	-0,9154 to 0,08301	No	ns	0.3887					10-4:PHPF1 vs. 10-4:PMFA2	-0.02246	-0,1417 to 0,09678	No	ns	>0,9999					0.0001:DIX19 (PAGA2) vs. 0.0001:DIX25 (PFIG1)	0.4209	-0,03745 to 0,8793	No	ns	0.1555
	10-4:PHPF1 vs. 10-3:PCSS1	0.09582	-0,5903 to 0,7819	No	ns	>0,9999															0.0001:DIX19 (PAGA2) vs. 0.001:DIX17 (PMFA2)	-0.2734	-0,9594 to 0,4127	No	ns	>0,9999					10-4:PHPF1 vs. 10-3:PCSS1	-0.2166	-0,3804 to -0,05270	Yes	***	0.0001					0.0001:DIX19 (PAGA2) vs. 0.001:DIX17 (PMFA2)	-1.816	-2,446 to -1,186	Yes	****	<0,0001
	10-4:PHPF1 vs. 10-3:PIME4	-0.1185	-0,8045 to 0,5676	No	ns	>0,9999															0.0001:DIX19 (PAGA2) vs. 0.001:DIX18 (PMFA1)	-0.2881	-0,9741 to 0,3980	No	ns	>0,9999					10-4:PHPF1 vs. 10-3:PIME4	-0.249	-0,4129 to -0,08513	Yes	****	<0,0001					0.0001:DIX19 (PAGA2) vs. 0.001:DIX18 (PMFA1)	-0.4304	-1,060 to 0,1996	No	ns	0.8994
	10-4:PHPF1 vs. 10-3:PHPF1	-0.5853	-1,056 to -0,1146	Yes	***	0.0006															0.0001:DIX19 (PAGA2) vs. 0.001:DIX19 (PAGA2)	-0.5853	-1,056 to -0,1146	Yes	***	0.0006					10-4:PHPF1 vs. 10-3:PHPF1	-0.1268	-0,2392 to -0,01441	Yes	**	0.0057					0.0001:DIX19 (PAGA2) vs. 0.001:DIX19 (PAGA2)	-0.4584	-0,8906 to -0,02627	Yes	*	0.0189
	10-4:PHPF1 vs. 10-3:PYCL076W	-0.7649	-1,451 to -0,07884	Yes	**	0.0073															0.0001:DIX19 (PAGA2) vs. 0.001:DIX20 (PYCL076W)	-0.8388	-1,525 to -0,1527	Yes	***	0.0009					10-4:PHPF1 vs. 10-3:PYCL076W	-0.2172	-0,3811 to -0,05334	Yes	***	0.0001					0.0001:DIX19 (PAGA2) vs. 0.001:DIX20 (PYCL076W)	0.1977	-0,4323 to 0,8277	No	ns	>0,9999
	10-4:PHPF1 vs. 10-3:PMFA1	-1.331	-2,017 to -0,6445	Yes	****	<0,0001															0.0001:DIX19 (PAGA2) vs. 0.001:DIX21 (PIME4)	-0.2095	-0,8956 to 0,4765	No	ns	>0,9999					10-4:PHPF1 vs. 10-3:PMFA1	-0.1548	-0,3187 to 0,009086	No	ns	0.1107					0.0001:DIX19 (PAGA2) vs. 0.001:DIX21 (PIME4)	0.876	0,2460 to 1,506	Yes	****	<0,0001
	10-4:PHPF1 vs. 10-3:PFIG1	-1.043	-1,729 to -0,3569	Yes	****	<0,0001															0.0001:DIX19 (PAGA2) vs. 0.001:DIX22 (PHPF1)	0.529	-0,1571 to 1,215	No	ns	0.6256					10-4:PHPF1 vs. 10-3:PFIG1	-0.2601	-0,4240 to -0,09623	Yes	****	<0,0001					0.0001:DIX19 (PAGA2) vs. 0.001:DIX22 (PHPF1)	0.287	-0,3430 to 0,9170	No	ns	>0,9999
	10-4:PHPF1 vs. 10-3:PAGA2	-1.389	-2,075 to -0,7028	Yes	****	<0,0001															0.0001:DIX19 (PAGA2) vs. 0.001:DIX23 (PCSS1)	0.38	-0,3061 to 1,066	No	ns	0.9986					10-4:PHPF1 vs. 10-3:PAGA2	-0.1851	-0,3489 to -0,02120	Yes	**	0.0056					0.0001:DIX19 (PAGA2) vs. 0.001:DIX23 (PCSS1)	1.058	0,4278 to 1,688	Yes	****	<0,0001
	10-4:PHPF1 vs. 10-3:PFUS1	-1.585	-2,271 to -0,8985	Yes	****	<0,0001															0.0001:DIX19 (PAGA2) vs. 0.001:DIX24 (PFUS1)	-1.077	-1,763 to -0,3909	Yes	****	<0,0001					10-4:PHPF1 vs. 10-3:PFUS1	-0.2701	-0,4340 to -0,1063	Yes	****	<0,0001					0.0001:DIX19 (PAGA2) vs. 0.001:DIX24 (PFUS1)	-0.5691	-1,199 to 0,06095	No	ns	0.1869
	10-4:PHPF1 vs. 10-3:PMFA2	-2.711	-3,397 to -2,025	Yes	****	<0,0001															0.0001:DIX19 (PAGA2) vs. 0.001:DIX25 (PFIG1)	-1.001	-1,688 to -0,3154	Yes	****	<0,0001					10-4:PHPF1 vs. 10-3:PMFA2	-0.1493	-0,3132 to 0,01458	No	ns	0.1702					0.0001:DIX19 (PAGA2) vs. 0.001:DIX25 (PFIG1)	-0.0375	-0,6675 to 0,5925	No	ns	>0,9999
	10-4:PHPF1 vs. 10-2:PCSS1	-0.5919	-1,278 to 0,09416	No	ns	0.2934															0.0001:DIX19 (PAGA2) vs. 0.01:DIX17 (PMFA2)	-0.9611	-1,647 to -0,2750	Yes	****	<0,0001					10-4:PHPF1 vs. 10-2:PCSS1	-0.5236	-0,6875 to -0,3597	Yes	****	<0,0001					0.0001:DIX19 (PAGA2) vs. 0.01:DIX17 (PMFA2)	-2.197	-2,827 to -1,567	Yes	****	<0,0001
	10-4:PHPF1 vs. 10-2:PIME4	-0.8062	-1,492 to -0,1201	Yes	**	0.0024															0.0001:DIX19 (PAGA2) vs. 0.01:DIX18 (PMFA1)	-0.9758	-1,662 to -0,2897	Yes	****	<0,0001					10-4:PHPF1 vs. 10-2:PIME4	-0.556	-0,7199 to -0,3922	Yes	****	<0,0001					0.0001:DIX19 (PAGA2) vs. 0.01:DIX18 (PMFA1)	-0.8111	-1,441 to -0,1811	Yes	***	0.0002
	10-4:PHPF1 vs. 10-2:PHPF1	-1.273	-1,744 to -0,8024	Yes	****	<0,0001															0.0001:DIX19 (PAGA2) vs. 0.01:DIX19 (PAGA2)	-1.273	-1,744 to -0,8024	Yes	****	<0,0001					10-4:PHPF1 vs. 10-2:PHPF1	-0.4339	-0,5463 to -0,3214	Yes	****	<0,0001					0.0001:DIX19 (PAGA2) vs. 0.01:DIX19 (PAGA2)	-0.8392	-1,271 to -0,4070	Yes	****	<0,0001
	10-4:PHPF1 vs. 10-2:PYCL076W	-1.453	-2,139 to -0,7666	Yes	****	<0,0001															0.0001:DIX19 (PAGA2) vs. 0.01:DIX20 (PYCL076W)	-1.527	-2,213 to -0,8405	Yes	****	<0,0001					10-4:PHPF1 vs. 10-2:PYCL076W	-0.5242	-0,6881 to -0,3604	Yes	****	<0,0001					0.0001:DIX19 (PAGA2) vs. 0.01:DIX20 (PYCL076W)	-0.183	-0,8130 to 0,4470	No	ns	>0,9999
	10-4:PHPF1 vs. 10-2:PMFA1	-2.018	-2,704 to -1,332	Yes	****	<0,0001															0.0001:DIX19 (PAGA2) vs. 0.01:DIX21 (PIME4)	-0.8973	-1,583 to -0,2112	Yes	***	0.0002					10-4:PHPF1 vs. 10-2:PMFA1	-0.4618	-0,6257 to -0,2979	Yes	****	<0,0001					0.0001:DIX19 (PAGA2) vs. 0.01:DIX21 (PIME4)	0.4952	-0,1348 to 1,125	No	ns	0.5675
	10-4:PHPF1 vs. 10-2:PFIG1	-1.731	-2,417 to -1,045	Yes	****	<0,0001															0.0001:DIX19 (PAGA2) vs. 0.01:DIX22 (PHPF1)	-0.1587	-0,8448 to 0,5273	No	ns	>0,9999					10-4:PHPF1 vs. 10-2:PFIG1	-0.5671	-0,7310 to -0,4033	Yes	****	<0,0001					0.0001:DIX19 (PAGA2) vs. 0.01:DIX22 (PHPF1)	-0.09375	-0,7237 to 0,5362	No	ns	>0,9999
	10-4:PHPF1 vs. 10-2:PAGA2	-2.077	-2,763 to -1,391	Yes	****	<0,0001															0.0001:DIX19 (PAGA2) vs. 0.01:DIX23 (PCSS1)	-0.3077	-0,9938 to 0,3784	No	ns	>0,9999					10-4:PHPF1 vs. 10-2:PAGA2	-0.4921	-0,6560 to -0,3282	Yes	****	<0,0001					0.0001:DIX19 (PAGA2) vs. 0.01:DIX23 (PCSS1)	0.6771	0,04709 to 1,307	Yes	*	0.0149
	10-4:PHPF1 vs. 10-2:PFUS1	-2.272	-2,958 to -1,586	Yes	****	<0,0001															0.0001:DIX19 (PAGA2) vs. 0.01:DIX24 (PFUS1)	-1.765	-2,451 to -1,079	Yes	****	<0,0001					10-4:PHPF1 vs. 10-2:PFUS1	-0.5772	-0,7410 to -0,4133	Yes	****	<0,0001					0.0001:DIX19 (PAGA2) vs. 0.01:DIX24 (PFUS1)	-0.9498	-1,580 to -0,3198	Yes	****	<0,0001
	10-4:PHPF1 vs. 10-2:PMFA2	-3.399	-4,085 to -2,713	Yes	****	<0,0001															0.0001:DIX19 (PAGA2) vs. 0.01:DIX25 (PFIG1)	-1.689	-2,375 to -1,003	Yes	****	<0,0001					10-4:PHPF1 vs. 10-2:PMFA2	-0.4563	-0,6202 to -0,2924	Yes	****	<0,0001					0.0001:DIX19 (PAGA2) vs. 0.01:DIX25 (PFIG1)	-0.4182	-1,048 to 0,2118	No	ns	0.9344
	10-4:PHPF1 vs. 10-1:Neg.Con.	-0.1356	-0,9161 to 0,6449	No	ns	>0,9999															0.0001:DIX19 (PAGA2) vs. 0.1:DIX14 (Neg.Con.)	-0.4696	-1,250 to 0,3109	No	ns	0.9896					10-4:PHPF1 vs. 10-1:Neg.Con.	-0.5639	-0,7503 to -0,3774	Yes	****	<0,0001					0.0001:DIX19 (PAGA2) vs. 0.1:DIX14 (Neg.Con.)	1.174	0,4570 to 1,890	Yes	****	<0,0001
	10-4:PHPF1 vs. 10-1:PPGK1	-2.463	-3,243 to -1,682	Yes	****	<0,0001															0.0001:DIX19 (PAGA2) vs. 0.1:DIX27 (PPGK1)	-0.4627	-1,243 to 0,3178	No	ns	0.9925					10-4:PHPF1 vs. 10-1:PPGK1	-0.5349	-0,7213 to -0,3485	Yes	****	<0,0001					0.0001:DIX19 (PAGA2) vs. 0.1:DIX27 (PPGK1)	-1.183	-1,899 to -0,4658	Yes	****	<0,0001
	10-4:PHPF1 vs. 10-1:PTDH3	-3.407	-4,188 to -2,627	Yes	****	<0,0001															0.0001:DIX19 (PAGA2) vs. 0.1:DIX28 (PTDH3)	-0.4875	-1,268 to 0,2929	No	ns	0.9774					10-4:PHPF1 vs. 10-1:PTDH3	-0.5638	-0,7502 to -0,3774	Yes	****	<0,0001					0.0001:DIX19 (PAGA2) vs. 0.1:DIX28 (PTDH3)	-2.098	-2,815 to -1,381	Yes	****	<0,0001
	10-4:PHPF1 vs. 10-1:PCSS1	-0.7186	-1,391 to -0,04613	Yes	*	0.0165															0.0001:DIX19 (PAGA2) vs. 0.1:DIX17 (PMFA2)	-1.088	-1,760 to -0,4153	Yes	****	<0,0001					10-4:PHPF1 vs. 10-1:PCSS1	-0.6481	-0,8088 to -0,4875	Yes	****	<0,0001					0.0001:DIX19 (PAGA2) vs. 0.1:DIX17 (PMFA2)	-2.199	-2,817 to -1,582	Yes	****	<0,0001
	10-4:PHPF1 vs. 10-1:PIME4	-0.9329	-1,605 to -0,2604	Yes	****	<0,0001															0.0001:DIX19 (PAGA2) vs. 0.1:DIX18 (PMFA1)	-1.102	-1,775 to -0,4300	Yes	****	<0,0001					10-4:PHPF1 vs. 10-1:PIME4	-0.6806	-0,8412 to -0,5200	Yes	****	<0,0001					0.0001:DIX19 (PAGA2) vs. 0.1:DIX18 (PMFA1)	-0.8132	-1,431 to -0,1957	Yes	***	0.0001
	10-4:PHPF1 vs. 10-1:PHPF1	-1.4	-1,850 to -0,9491	Yes	****	<0,0001															0.0001:DIX19 (PAGA2) vs. 0.1:DIX19 (PAGA2)	-1.4	-1,850 to -0,9491	Yes	****	<0,0001					10-4:PHPF1 vs. 10-1:PHPF1	-0.5584	-0,6660 to -0,4508	Yes	****	<0,0001					0.0001:DIX19 (PAGA2) vs. 0.1:DIX19 (PAGA2)	-0.8413	-1,255 to -0,4275	Yes	****	<0,0001
	10-4:PHPF1 vs. 10-1:PYCL076W	-1.579	-2,252 to -0,9069	Yes	****	<0,0001															0.0001:DIX19 (PAGA2) vs. 0.1:DIX20 (PYCL076W)	-1.653	-2,326 to -0,9808	Yes	****	<0,0001					10-4:PHPF1 vs. 10-1:PYCL076W	-0.6488	-0,8094 to -0,4882	Yes	****	<0,0001					0.0001:DIX19 (PAGA2) vs. 0.1:DIX20 (PYCL076W)	-0.1852	-0,8027 to 0,4324	No	ns	>0,9999
	10-4:PHPF1 vs. 10-1:PMFA1	-2.145	-2,818 to -1,473	Yes	****	<0,0001															0.0001:DIX19 (PAGA2) vs. 0.1:DIX21 (PIME4)	-1.024	-1,696 to -0,3515	Yes	****	<0,0001					10-4:PHPF1 vs. 10-1:PMFA1	-0.5864	-0,7470 to -0,4257	Yes	****	<0,0001					0.0001:DIX19 (PAGA2) vs. 0.1:DIX21 (PIME4)	0.4931	-0,1244 to 1,111	No	ns	0.5195
	10-4:PHPF1 vs. 10-1:PFIG1	-1.857	-2,530 to -1,185	Yes	****	<0,0001															0.0001:DIX19 (PAGA2) vs. 0.1:DIX22 (PHPF1)	-0.2854	-0,9579 to 0,3871	No	ns	>0,9999					10-4:PHPF1 vs. 10-1:PFIG1	-0.6917	-0,8523 to -0,5311	Yes	****	<0,0001					0.0001:DIX19 (PAGA2) vs. 0.1:DIX22 (PHPF1)	-0.09591	-0,7134 to 0,5216	No	ns	>0,9999
	10-4:PHPF1 vs. 10-1:PAGA2	-2.203	-2,876 to -1,531	Yes	****	<0,0001															0.0001:DIX19 (PAGA2) vs. 0.1:DIX23 (PCSS1)	-0.4344	-1,107 to 0,2381	No	ns	0.9582					10-4:PHPF1 vs. 10-1:PAGA2	-0.6166	-0,7773 to -0,4560	Yes	****	<0,0001					0.0001:DIX19 (PAGA2) vs. 0.1:DIX23 (PCSS1)	0.6749	0,05741 to 1,292	Yes	*	0.0108
	10-4:PHPF1 vs. 10-1:PFUS1	-2.399	-3,072 to -1,727	Yes	****	<0,0001															0.0001:DIX19 (PAGA2) vs. 0.1:DIX24 (PFUS1)	-1.891	-2,564 to -1,219	Yes	****	<0,0001					10-4:PHPF1 vs. 10-1:PFUS1	-0.7017	-0,8623 to -0,5411	Yes	****	<0,0001					0.0001:DIX19 (PAGA2) vs. 0.1:DIX24 (PFUS1)	-0.9519	-1,569 to -0,3344	Yes	****	<0,0001
	10-4:PHPF1 vs. 10-1:PMFA2	-3.525	-4,198 to -2,853	Yes	****	<0,0001															0.0001:DIX19 (PAGA2) vs. 0.1:DIX25 (PFIG1)	-1.816	-2,488 to -1,143	Yes	****	<0,0001					10-4:PHPF1 vs. 10-1:PMFA2	-0.5809	-0,7415 to -0,4202	Yes	****	<0,0001					0.0001:DIX19 (PAGA2) vs. 0.1:DIX25 (PFIG1)	-0.4204	-1,038 to 0,1972	No	ns	0.9043
	10-4:PHPF1 vs. 100:PCSS1	-0.8816	-1,568 to -0,1955	Yes	***	0.0003															0.0001:DIX19 (PAGA2) vs. 1:DIX17 (PMFA2)	-1.251	-1,937 to -0,5647	Yes	****	<0,0001					10-4:PHPF1 vs. 100:PCSS1	-0.691	-0,8549 to -0,5271	Yes	****	<0,0001					0.0001:DIX19 (PAGA2) vs. 1:DIX17 (PMFA2)	-2.319	-2,949 to -1,689	Yes	****	<0,0001
	10-4:PHPF1 vs. 100:PIME4	-1.096	-1,782 to -0,4098	Yes	****	<0,0001															0.0001:DIX19 (PAGA2) vs. 1:DIX18 (PMFA1)	-1.265	-1,952 to -0,5794	Yes	****	<0,0001					10-4:PHPF1 vs. 100:PIME4	-0.7234	-0,8873 to -0,5596	Yes	****	<0,0001					0.0001:DIX19 (PAGA2) vs. 1:DIX18 (PMFA1)	-0.9334	-1,563 to -0,3034	Yes	****	<0,0001
	10-4:PHPF1 vs. 100:PHPF1	-1.563	-2,033 to -1,092	Yes	****	<0,0001															0.0001:DIX19 (PAGA2) vs. 1:DIX19 (PAGA2)	-1.563	-2,033 to -1,092	Yes	****	<0,0001					10-4:PHPF1 vs. 100:PHPF1	-0.6013	-0,7137 to -0,4888	Yes	****	<0,0001					0.0001:DIX19 (PAGA2) vs. 1:DIX19 (PAGA2)	-0.9614	-1,394 to -0,5293	Yes	****	<0,0001
	10-4:PHPF1 vs. 100:PYCL076W	-1.742	-2,428 to -1,056	Yes	****	<0,0001															0.0001:DIX19 (PAGA2) vs. 1:DIX20 (PYCL076W)	-1.816	-2,502 to -1,130	Yes	****	<0,0001					10-4:PHPF1 vs. 100:PYCL076W	-0.6916	-0,8555 to -0,5278	Yes	****	<0,0001					0.0001:DIX19 (PAGA2) vs. 1:DIX20 (PYCL076W)	-0.3053	-0,9353 to 0,3247	No	ns	>0,9999
	10-4:PHPF1 vs. 100:PMFA1	-2.308	-2,994 to -1,622	Yes	****	<0,0001															0.0001:DIX19 (PAGA2) vs. 1:DIX21 (PIME4)	-1.187	-1,873 to -0,5009	Yes	****	<0,0001					10-4:PHPF1 vs. 100:PMFA1	-0.6292	-0,7931 to -0,4653	Yes	****	<0,0001					0.0001:DIX19 (PAGA2) vs. 1:DIX21 (PIME4)	0.373	-0,2570 to 1,003	No	ns	0.9927
	10-4:PHPF1 vs. 100:PFIG1	-2.02	-2,706 to -1,334	Yes	****	<0,0001															0.0001:DIX19 (PAGA2) vs. 1:DIX22 (PHPF1)	-0.4484	-1,134 to 0,2377	No	ns	0.949					10-4:PHPF1 vs. 100:PFIG1	-0.7345	-0,8984 to -0,5707	Yes	****	<0,0001					0.0001:DIX19 (PAGA2) vs. 1:DIX22 (PHPF1)	-0.216	-0,8460 to 0,4140	No	ns	>0,9999
	10-4:PHPF1 vs. 100:PAGA2	-2.366	-3,052 to -1,680	Yes	****	<0,0001															0.0001:DIX19 (PAGA2) vs. 1:DIX23 (PCSS1)	-0.5974	-1,283 to 0,08868	No	ns	0.2699					10-4:PHPF1 vs. 100:PAGA2	-0.6595	-0,8234 to -0,4956	Yes	****	<0,0001					0.0001:DIX19 (PAGA2) vs. 1:DIX23 (PCSS1)	0.5548	-0,07518 to 1,185	No	ns	0.2424
	10-4:PHPF1 vs. 100:PFUS1	-2.562	-3,248 to -1,876	Yes	****	<0,0001															0.0001:DIX19 (PAGA2) vs. 1:DIX24 (PFUS1)	-2.054	-2,740 to -1,368	Yes	****	<0,0001					10-4:PHPF1 vs. 100:PFUS1	-0.7446	-0,9084 to -0,5807	Yes	****	<0,0001					0.0001:DIX19 (PAGA2) vs. 1:DIX24 (PFUS1)	-1.072	-1,702 to -0,4420	Yes	****	<0,0001
	10-4:PHPF1 vs. 100:PMFA2	-3.688	-4,374 to -3,002	Yes	****	<0,0001															0.0001:DIX19 (PAGA2) vs. 1:DIX25 (PFIG1)	-1.979	-2,665 to -1,293	Yes	****	<0,0001					10-4:PHPF1 vs. 100:PMFA2	-0.6237	-0,7876 to -0,4598	Yes	****	<0,0001					0.0001:DIX19 (PAGA2) vs. 1:DIX25 (PFIG1)	-0.5405	-1,170 to 0,08951	No	ns	0.3083
	10-4:PHPF1 vs. 101:PCSS1	-0.8211	-1,507 to -0,1350	Yes	**	0.0015															0.0001:DIX19 (PAGA2) vs. 10:DIX17 (PMFA2)	-1.19	-1,876 to -0,5042	Yes	****	<0,0001					10-4:PHPF1 vs. 101:PCSS1	-0.6167	-0,7806 to -0,4529	Yes	****	<0,0001					0.0001:DIX19 (PAGA2) vs. 10:DIX17 (PMFA2)	-2.333	-2,963 to -1,703	Yes	****	<0,0001
	10-4:PHPF1 vs. 101:PIME4	-1.035	-1,721 to -0,3493	Yes	****	<0,0001															0.0001:DIX19 (PAGA2) vs. 10:DIX18 (PMFA1)	-1.205	-1,891 to -0,5189	Yes	****	<0,0001					10-4:PHPF1 vs. 101:PIME4	-0.6492	-0,8130 to -0,4853	Yes	****	<0,0001					0.0001:DIX19 (PAGA2) vs. 10:DIX18 (PMFA1)	-0.9471	-1,577 to -0,3171	Yes	****	<0,0001
	10-4:PHPF1 vs. 101:PHPF1	-1.502	-1,973 to -1,032	Yes	****	<0,0001															0.0001:DIX19 (PAGA2) vs. 10:DIX19 (PAGA2)	-1.502	-1,973 to -1,032	Yes	****	<0,0001					10-4:PHPF1 vs. 101:PHPF1	-0.527	-0,6394 to -0,4146	Yes	****	<0,0001					0.0001:DIX19 (PAGA2) vs. 10:DIX19 (PAGA2)	-0.9752	-1,407 to -0,5430	Yes	****	<0,0001
	10-4:PHPF1 vs. 101:PYCL076W	-1.682	-2,368 to -0,9958	Yes	****	<0,0001															0.0001:DIX19 (PAGA2) vs. 10:DIX20 (PYCL076W)	-1.756	-2,442 to -1,070	Yes	****	<0,0001					10-4:PHPF1 vs. 101:PYCL076W	-0.6174	-0,7813 to -0,4535	Yes	****	<0,0001					0.0001:DIX19 (PAGA2) vs. 10:DIX20 (PYCL076W)	-0.319	-0,9490 to 0,3110	No	ns	>0,9999
	10-4:PHPF1 vs. 101:PMFA1	-2.247	-2,934 to -1,561	Yes	****	<0,0001															0.0001:DIX19 (PAGA2) vs. 10:DIX21 (PIME4)	-1.126	-1,813 to -0,4404	Yes	****	<0,0001					10-4:PHPF1 vs. 101:PMFA1	-0.555	-0,7188 to -0,3911	Yes	****	<0,0001					0.0001:DIX19 (PAGA2) vs. 10:DIX21 (PIME4)	0.3592	-0,2708 to 0,9892	No	ns	0.997
	10-4:PHPF1 vs. 101:PFIG1	-1.96	-2,646 to -1,274	Yes	****	<0,0001															0.0001:DIX19 (PAGA2) vs. 10:DIX22 (PHPF1)	-0.3879	-1,074 to 0,2982	No	ns	0.9976					10-4:PHPF1 vs. 101:PFIG1	-0.6603	-0,8241 to -0,4964	Yes	****	<0,0001					0.0001:DIX19 (PAGA2) vs. 10:DIX22 (PHPF1)	-0.2298	-0,8598 to 0,4002	No	ns	>0,9999
	10-4:PHPF1 vs. 101:PAGA2	-2.306	-2,992 to -1,620	Yes	****	<0,0001															0.0001:DIX19 (PAGA2) vs. 10:DIX23 (PCSS1)	-0.5369	-1,223 to 0,1492	No	ns	0.5813					10-4:PHPF1 vs. 101:PAGA2	-0.5852	-0,7491 to -0,4214	Yes	****	<0,0001					0.0001:DIX19 (PAGA2) vs. 10:DIX23 (PCSS1)	0.5411	-0,08894 to 1,171	No	ns	0.3055
	10-4:PHPF1 vs. 101:PFUS1	-2.502	-3,188 to -1,815	Yes	****	<0,0001															0.0001:DIX19 (PAGA2) vs. 10:DIX24 (PFUS1)	-1.994	-2,680 to -1,308	Yes	****	<0,0001					10-4:PHPF1 vs. 101:PFUS1	-0.6703	-0,8342 to -0,5064	Yes	****	<0,0001					0.0001:DIX19 (PAGA2) vs. 10:DIX24 (PFUS1)	-1.086	-1,716 to -0,4558	Yes	****	<0,0001
	10-4:PHPF1 vs. 101:PMFA2	-3.628	-4,314 to -2,942	Yes	****	<0,0001															0.0001:DIX19 (PAGA2) vs. 10:DIX25 (PFIG1)	-1.918	-2,604 to -1,232	Yes	****	<0,0001					10-4:PHPF1 vs. 101:PMFA2	-0.5495	-0,7133 to -0,3856	Yes	****	<0,0001					0.0001:DIX19 (PAGA2) vs. 10:DIX25 (PFIG1)	-0.5542	-1,184 to 0,07575	No	ns	0.2448
	10-4:PHPF1 vs. 102:Neg.Con.	-0.1735	-0,9540 to 0,6070	No	ns	>0,9999															0.0001:DIX19 (PAGA2) vs. 100:DIX14 (Neg.Con.)	-0.5075	-1,288 to 0,2730	No	ns	0.9532					10-4:PHPF1 vs. 102:Neg.Con.	-0.5508	-0,7372 to -0,3644	Yes	****	<0,0001					0.0001:DIX19 (PAGA2) vs. 100:DIX14 (Neg.Con.)	1.123	0,4060 to 1,839	Yes	****	<0,0001
	10-4:PHPF1 vs. 102:PPGK1	-2.501	-3,281 to -1,720	Yes	****	<0,0001															0.0001:DIX19 (PAGA2) vs. 100:DIX27 (PPGK1)	-0.5006	-1,281 to 0,2799	No	ns	0.9631					10-4:PHPF1 vs. 102:PPGK1	-0.5219	-0,7083 to -0,3354	Yes	****	<0,0001					0.0001:DIX19 (PAGA2) vs. 100:DIX27 (PPGK1)	-1.233	-1,950 to -0,5168	Yes	****	<0,0001
	10-4:PHPF1 vs. 102:PTDH3	-3.445	-4,226 to -2,665	Yes	****	<0,0001															0.0001:DIX19 (PAGA2) vs. 100:DIX28 (PTDH3)	-0.5255	-1,306 to 0,2550	No	ns	0.9186					10-4:PHPF1 vs. 102:PTDH3	-0.5508	-0,7372 to -0,3643	Yes	****	<0,0001					0.0001:DIX19 (PAGA2) vs. 100:DIX28 (PTDH3)	-2.149	-2,866 to -1,432	Yes	****	<0,0001
	10-4:PHPF1 vs. 102:PCSS1	-0.7565	-1,429 to -0,08405	Yes	**	0.0061															0.0001:DIX19 (PAGA2) vs. 100:DIX17 (PMFA2)	-1.126	-1,798 to -0,4532	Yes	****	<0,0001					10-4:PHPF1 vs. 102:PCSS1	-0.6351	-0,7957 to -0,4745	Yes	****	<0,0001					0.0001:DIX19 (PAGA2) vs. 100:DIX17 (PMFA2)	-2.25	-2,868 to -1,633	Yes	****	<0,0001
	10-4:PHPF1 vs. 102:PIME4	-0.9708	-1,643 to -0,2983	Yes	****	<0,0001															0.0001:DIX19 (PAGA2) vs. 100:DIX18 (PMFA1)	-1.14	-1,813 to -0,4679	Yes	****	<0,0001					10-4:PHPF1 vs. 102:PIME4	-0.6675	-0,8281 to -0,5069	Yes	****	<0,0001					0.0001:DIX19 (PAGA2) vs. 100:DIX18 (PMFA1)	-0.8642	-1,482 to -0,2467	Yes	****	<0,0001
	10-4:PHPF1 vs. 102:PHPF1	-1.438	-1,888 to -0,9870	Yes	****	<0,0001															0.0001:DIX19 (PAGA2) vs. 100:DIX19 (PAGA2)	-1.438	-1,888 to -0,9870	Yes	****	<0,0001					10-4:PHPF1 vs. 102:PHPF1	-0.5453	-0,6530 to -0,4377	Yes	****	<0,0001					0.0001:DIX19 (PAGA2) vs. 100:DIX19 (PAGA2)	-0.8923	-1,306 to -0,4785	Yes	****	<0,0001
	10-4:PHPF1 vs. 102:PYCL076W	-1.617	-2,290 to -0,9448	Yes	****	<0,0001															0.0001:DIX19 (PAGA2) vs. 100:DIX20 (PYCL076W)	-1.691	-2,364 to -1,019	Yes	****	<0,0001					10-4:PHPF1 vs. 102:PYCL076W	-0.6357	-0,7964 to -0,4751	Yes	****	<0,0001					0.0001:DIX19 (PAGA2) vs. 100:DIX20 (PYCL076W)	-0.2361	-0,8537 to 0,3814	No	ns	>0,9999
	10-4:PHPF1 vs. 102:PMFA1	-2.183	-2,855 to -1,510	Yes	****	<0,0001															0.0001:DIX19 (PAGA2) vs. 100:DIX21 (PIME4)	-1.062	-1,734 to -0,3894	Yes	****	<0,0001					10-4:PHPF1 vs. 102:PMFA1	-0.5733	-0,7339 to -0,4127	Yes	****	<0,0001					0.0001:DIX19 (PAGA2) vs. 100:DIX21 (PIME4)	0.4421	-0,1754 to 1,060	No	ns	0.817
	10-4:PHPF1 vs. 102:PFIG1	-1.895	-2,568 to -1,223	Yes	****	<0,0001															0.0001:DIX19 (PAGA2) vs. 100:DIX22 (PHPF1)	-0.3233	-0,9958 to 0,3491	No	ns	>0,9999					10-4:PHPF1 vs. 102:PFIG1	-0.6786	-0,8392 to -0,5180	Yes	****	<0,0001					0.0001:DIX19 (PAGA2) vs. 100:DIX22 (PHPF1)	-0.1469	-0,7644 to 0,4706	No	ns	>0,9999
	10-4:PHPF1 vs. 102:PAGA2	-2.241	-2,914 to -1,569	Yes	****	<0,0001															0.0001:DIX19 (PAGA2) vs. 100:DIX23 (PCSS1)	-0.4723	-1,145 to 0,2002	No	ns	0.8546					10-4:PHPF1 vs. 102:PAGA2	-0.6036	-0,7642 to -0,4430	Yes	****	<0,0001					0.0001:DIX19 (PAGA2) vs. 100:DIX23 (PCSS1)	0.6239	0,006428 to 1,241	Yes	*	0.0426
	10-4:PHPF1 vs. 102:PFUS1	-2.437	-3,109 to -1,764	Yes	****	<0,0001															0.0001:DIX19 (PAGA2) vs. 100:DIX24 (PFUS1)	-1.929	-2,602 to -1,257	Yes	****	<0,0001					10-4:PHPF1 vs. 102:PFUS1	-0.6886	-0,8493 to -0,5280	Yes	****	<0,0001					0.0001:DIX19 (PAGA2) vs. 100:DIX24 (PFUS1)	-1.003	-1,620 to -0,3854	Yes	****	<0,0001
	10-4:PHPF1 vs. 102:PMFA2	-3.563	-4,236 to -2,891	Yes	****	<0,0001															0.0001:DIX19 (PAGA2) vs. 100:DIX25 (PFIG1)	-1.854	-2,526 to -1,181	Yes	****	<0,0001					10-4:PHPF1 vs. 102:PMFA2	-0.5678	-0,7284 to -0,4072	Yes	****	<0,0001					0.0001:DIX19 (PAGA2) vs. 100:DIX25 (PFIG1)	-0.4714	-1,089 to 0,1462	No	ns	0.6552
	10-4:PYCL076W vs. 10-4:PMFA1	-0.5657	-1,065 to -0,06646	Yes	**	0.0052															0.0001:DIX20 (PYCL076W) vs. 0.0001:DIX21 (PIME4)	0.6293	0,1301 to 1,128	Yes	***	0.0004					10-4:PYCL076W vs. 10-4:PMFA1	0.06243	-0,05680 to 0,1817	No	ns	0.9997					0.0001:DIX20 (PYCL076W) vs. 0.0001:DIX21 (PIME4)	0.6783	0,2199 to 1,137	Yes	****	<0,0001
	10-4:PYCL076W vs. 10-4:PFIG1	-0.2781	-0,7773 to 0,2211	No	ns	0.9984															0.0001:DIX20 (PYCL076W) vs. 0.0001:DIX22 (PHPF1)	1.368	0,8686 to 1,867	Yes	****	<0,0001					10-4:PYCL076W vs. 10-4:PFIG1	-0.04288	-0,1621 to 0,07635	No	ns	>0,9999					0.0001:DIX20 (PYCL076W) vs. 0.0001:DIX22 (PHPF1)	0.08926	-0,3691 to 0,5476	No	ns	>0,9999
	10-4:PYCL076W vs. 10-4:PAGA2	-0.624	-1,123 to -0,1248	Yes	***	0.0005															0.0001:DIX20 (PYCL076W) vs. 0.0001:DIX23 (PCSS1)	1.219	0,7196 to 1,718	Yes	****	<0,0001					10-4:PYCL076W vs. 10-4:PAGA2	0.03214	-0,08709 to 0,1514	No	ns	>0,9999					0.0001:DIX20 (PYCL076W) vs. 0.0001:DIX23 (PCSS1)	0.8601	0,4017 to 1,318	Yes	****	<0,0001
	10-4:PYCL076W vs. 10-4:PFUS1	-0.8197	-1,319 to -0,3205	Yes	****	<0,0001															0.0001:DIX20 (PYCL076W) vs. 0.0001:DIX24 (PFUS1)	-0.2382	-0,7374 to 0,2610	No	ns	>0,9999					10-4:PYCL076W vs. 10-4:PFUS1	-0.05292	-0,1722 to 0,06631	No	ns	>0,9999					0.0001:DIX20 (PYCL076W) vs. 0.0001:DIX24 (PFUS1)	-0.7668	-1,225 to -0,3084	Yes	****	<0,0001
	10-4:PYCL076W vs. 10-4:PMFA2	-1.946	-2,445 to -1,447	Yes	****	<0,0001															0.0001:DIX20 (PYCL076W) vs. 0.0001:DIX25 (PFIG1)	-0.1627	-0,6619 to 0,3365	No	ns	>0,9999					10-4:PYCL076W vs. 10-4:PMFA2	0.06793	-0,05131 to 0,1872	No	ns	0.9971					0.0001:DIX20 (PYCL076W) vs. 0.0001:DIX25 (PFIG1)	-0.2352	-0,6936 to 0,2232	No	ns	0.9999
	10-4:PYCL076W vs. 10-3:PCSS1	0.2755	-0,4106 to 0,9615	No	ns	>0,9999															0.0001:DIX20 (PYCL076W) vs. 0.001:DIX17 (PMFA2)	-0.01983	-0,7059 to 0,6662	No	ns	>0,9999					10-4:PYCL076W vs. 10-3:PCSS1	-0.1262	-0,2901 to 0,03768	No	ns	0.6296					0.0001:DIX20 (PYCL076W) vs. 0.001:DIX17 (PMFA2)	-2.472	-3,102 to -1,842	Yes	****	<0,0001
	10-4:PYCL076W vs. 10-3:PIME4	0.06119	-0,6249 to 0,7473	No	ns	>0,9999															0.0001:DIX20 (PYCL076W) vs. 0.001:DIX18 (PMFA1)	-0.03453	-0,7206 to 0,6515	No	ns	>0,9999					10-4:PYCL076W vs. 10-3:PIME4	-0.1586	-0,3225 to 0,005256	No	ns	0.0801					0.0001:DIX20 (PYCL076W) vs. 0.001:DIX18 (PMFA1)	-1.087	-1,717 to -0,4565	Yes	****	<0,0001
	10-4:PYCL076W vs. 10-3:PHPF1	-0.4056	-1,092 to 0,2804	No	ns	0.9929															0.0001:DIX20 (PYCL076W) vs. 0.001:DIX19 (PAGA2)	-0.3318	-1,018 to 0,3543	No	ns	>0,9999					10-4:PYCL076W vs. 10-3:PHPF1	-0.03644	-0,2003 to 0,1274	No	ns	>0,9999					0.0001:DIX20 (PYCL076W) vs. 0.001:DIX19 (PAGA2)	-1.115	-1,745 to -0,4846	Yes	****	<0,0001
	10-4:PYCL076W vs. 10-3:PYCL076W	-0.5853	-1,056 to -0,1146	Yes	***	0.0006															0.0001:DIX20 (PYCL076W) vs. 0.001:DIX20 (PYCL076W)	-0.5853	-1,056 to -0,1146	Yes	***	0.0006					10-4:PYCL076W vs. 10-3:PYCL076W	-0.1268	-0,2392 to -0,01441	Yes	**	0.0057					0.0001:DIX20 (PYCL076W) vs. 0.001:DIX20 (PYCL076W)	-0.4584	-0,8906 to -0,02627	Yes	*	0.0189
	10-4:PYCL076W vs. 10-3:PMFA1	-1.151	-1,837 to -0,4649	Yes	****	<0,0001															0.0001:DIX20 (PYCL076W) vs. 0.001:DIX21 (PIME4)	0.04399	-0,6421 to 0,7301	No	ns	>0,9999					10-4:PYCL076W vs. 10-3:PMFA1	-0.0644	-0,2283 to 0,09947	No	ns	>0,9999					0.0001:DIX20 (PYCL076W) vs. 0.001:DIX21 (PIME4)	0.2198	-0,4102 to 0,8498	No	ns	>0,9999
	10-4:PYCL076W vs. 10-3:PFIG1	-0.8634	-1,549 to -0,1773	Yes	***	0.0004															0.0001:DIX20 (PYCL076W) vs. 0.001:DIX22 (PHPF1)	0.7825	0,09646 to 1,469	Yes	**	0.0046					10-4:PYCL076W vs. 10-3:PFIG1	-0.1697	-0,3336 to -0,005843	Yes	*	0.0286					0.0001:DIX20 (PYCL076W) vs. 0.001:DIX22 (PHPF1)	-0.3692	-0,9992 to 0,2608	No	ns	0.9942
	10-4:PYCL076W vs. 10-3:PAGA2	-1.209	-1,895 to -0,5232	Yes	****	<0,0001															0.0001:DIX20 (PYCL076W) vs. 0.001:DIX23 (PCSS1)	0.6335	-0,05253 to 1,320	No	ns	0.1458					10-4:PYCL076W vs. 10-3:PAGA2	-0.09468	-0,2586 to 0,06919	No	ns	0.9959					0.0001:DIX20 (PYCL076W) vs. 0.001:DIX23 (PCSS1)	0.4017	-0,2283 to 1,032	No	ns	0.9669
	10-4:PYCL076W vs. 10-3:PFUS1	-1.405	-2,091 to -0,7189	Yes	****	<0,0001															0.0001:DIX20 (PYCL076W) vs. 0.001:DIX24 (PFUS1)	-0.8234	-1,510 to -0,1374	Yes	**	0.0014					10-4:PYCL076W vs. 10-3:PFUS1	-0.1797	-0,3436 to -0,01588	Yes	*	0.0101					0.0001:DIX20 (PYCL076W) vs. 0.001:DIX24 (PFUS1)	-1.225	-1,855 to -0,5952	Yes	****	<0,0001
	10-4:PYCL076W vs. 10-3:PMFA2	-2.531	-3,217 to -1,845	Yes	****	<0,0001															0.0001:DIX20 (PYCL076W) vs. 0.001:DIX25 (PFIG1)	-0.7479	-1,434 to -0,06186	Yes	*	0.0114					10-4:PYCL076W vs. 10-3:PMFA2	-0.0589	-0,2228 to 0,1050	No	ns	>0,9999					0.0001:DIX20 (PYCL076W) vs. 0.001:DIX25 (PFIG1)	-0.6937	-1,324 to -0,06365	Yes	**	0.0094
	10-4:PYCL076W vs. 10-2:PCSS1	-0.4123	-1,098 to 0,2738	No	ns	0.9898															0.0001:DIX20 (PYCL076W) vs. 0.01:DIX17 (PMFA2)	-0.7076	-1,394 to -0,02149	Yes	*	0.0306					10-4:PYCL076W vs. 10-2:PCSS1	-0.4332	-0,5971 to -0,2693	Yes	****	<0,0001					0.0001:DIX20 (PYCL076W) vs. 0.01:DIX17 (PMFA2)	-2.853	-3,483 to -2,223	Yes	****	<0,0001
	10-4:PYCL076W vs. 10-2:PIME4	-0.6266	-1,313 to 0,05953	No	ns	0.1656															0.0001:DIX20 (PYCL076W) vs. 0.01:DIX18 (PMFA1)	-0.7223	-1,408 to -0,03620	Yes	*	0.0216					10-4:PYCL076W vs. 10-2:PIME4	-0.4656	-0,6295 to -0,3018	Yes	****	<0,0001					0.0001:DIX20 (PYCL076W) vs. 0.01:DIX18 (PMFA1)	-1.467	-2,097 to -0,8372	Yes	****	<0,0001
	10-4:PYCL076W vs. 10-2:PHPF1	-1.093	-1,779 to -0,4073	Yes	****	<0,0001															0.0001:DIX20 (PYCL076W) vs. 0.01:DIX19 (PAGA2)	-1.019	-1,706 to -0,3334	Yes	****	<0,0001					10-4:PYCL076W vs. 10-2:PHPF1	-0.3435	-0,5073 to -0,1796	Yes	****	<0,0001					0.0001:DIX20 (PYCL076W) vs. 0.01:DIX19 (PAGA2)	-1.495	-2,125 to -0,8653	Yes	****	<0,0001
	10-4:PYCL076W vs. 10-2:PYCL076W	-1.273	-1,744 to -0,8024	Yes	****	<0,0001															0.0001:DIX20 (PYCL076W) vs. 0.01:DIX20 (PYCL076W)	-1.273	-1,744 to -0,8024	Yes	****	<0,0001					10-4:PYCL076W vs. 10-2:PYCL076W	-0.4339	-0,5463 to -0,3214	Yes	****	<0,0001					0.0001:DIX20 (PYCL076W) vs. 0.01:DIX20 (PYCL076W)	-0.8392	-1,271 to -0,4070	Yes	****	<0,0001
	10-4:PYCL076W vs. 10-2:PMFA1	-1.839	-2,525 to -1,153	Yes	****	<0,0001															0.0001:DIX20 (PYCL076W) vs. 0.01:DIX21 (PIME4)	-0.6437	-1,330 to 0,04233	No	ns	0.1203					10-4:PYCL076W vs. 10-2:PMFA1	-0.3714	-0,5353 to -0,2076	Yes	****	<0,0001					0.0001:DIX20 (PYCL076W) vs. 0.01:DIX21 (PIME4)	-0.1609	-0,7909 to 0,4691	No	ns	>0,9999
	10-4:PYCL076W vs. 10-2:PFIG1	-1.551	-2,237 to -0,8650	Yes	****	<0,0001															0.0001:DIX20 (PYCL076W) vs. 0.01:DIX22 (PHPF1)	0.09479	-0,5913 to 0,7809	No	ns	>0,9999					10-4:PYCL076W vs. 10-2:PFIG1	-0.4767	-0,6406 to -0,3129	Yes	****	<0,0001					0.0001:DIX20 (PYCL076W) vs. 0.01:DIX22 (PHPF1)	-0.7499	-1,380 to -0,1199	Yes	**	0.0018
	10-4:PYCL076W vs. 10-2:PAGA2	-1.897	-2,583 to -1,211	Yes	****	<0,0001															0.0001:DIX20 (PYCL076W) vs. 0.01:DIX23 (PCSS1)	-0.05419	-0,7403 to 0,6319	No	ns	>0,9999					10-4:PYCL076W vs. 10-2:PAGA2	-0.4017	-0,5656 to -0,2378	Yes	****	<0,0001					0.0001:DIX20 (PYCL076W) vs. 0.01:DIX23 (PCSS1)	0.02094	-0,6091 to 0,6509	No	ns	>0,9999
	10-4:PYCL076W vs. 10-2:PFUS1	-2.093	-2,779 to -1,407	Yes	****	<0,0001															0.0001:DIX20 (PYCL076W) vs. 0.01:DIX24 (PFUS1)	-1.511	-2,197 to -0,8251	Yes	****	<0,0001					10-4:PYCL076W vs. 10-2:PFUS1	-0.4868	-0,6507 to -0,3229	Yes	****	<0,0001					0.0001:DIX20 (PYCL076W) vs. 0.01:DIX24 (PFUS1)	-1.606	-2,236 to -0,9759	Yes	****	<0,0001
	10-4:PYCL076W vs. 10-2:PMFA2	-3.219	-3,905 to -2,533	Yes	****	<0,0001															0.0001:DIX20 (PYCL076W) vs. 0.01:DIX25 (PFIG1)	-1.436	-2,122 to -0,7496	Yes	****	<0,0001					10-4:PYCL076W vs. 10-2:PMFA2	-0.3659	-0,5298 to -0,2021	Yes	****	<0,0001					0.0001:DIX20 (PYCL076W) vs. 0.01:DIX25 (PFIG1)	-1.074	-1,704 to -0,4444	Yes	****	<0,0001
	10-4:PYCL076W vs. 10-1:Neg.Con.	0.04406	-0,7364 to 0,8245	No	ns	>0,9999															0.0001:DIX20 (PYCL076W) vs. 0.1:DIX14 (Neg.Con.)	-0.2161	-0,9965 to 0,5644	No	ns	>0,9999					10-4:PYCL076W vs. 10-1:Neg.Con.	-0.4735	-0,6599 to -0,2871	Yes	****	<0,0001					0.0001:DIX20 (PYCL076W) vs. 0.1:DIX14 (Neg.Con.)	0.5175	-0,1991 to 1,234	No	ns	0.7983
	10-4:PYCL076W vs. 10-1:PPGK1	-2.283	-3,064 to -1,503	Yes	****	<0,0001															0.0001:DIX20 (PYCL076W) vs. 0.1:DIX27 (PPGK1)	-0.2092	-0,9896 to 0,5713	No	ns	>0,9999					10-4:PYCL076W vs. 10-1:PPGK1	-0.4445	-0,6310 to -0,2581	Yes	****	<0,0001					0.0001:DIX20 (PYCL076W) vs. 0.1:DIX27 (PPGK1)	-1.839	-2,555 to -1,122	Yes	****	<0,0001
	10-4:PYCL076W vs. 10-1:PTDH3	-3.228	-4,008 to -2,447	Yes	****	<0,0001															0.0001:DIX20 (PYCL076W) vs. 0.1:DIX28 (PTDH3)	-0.234	-1,014 to 0,5465	No	ns	>0,9999					10-4:PYCL076W vs. 10-1:PTDH3	-0.4734	-0,6599 to -0,2870	Yes	****	<0,0001					0.0001:DIX20 (PYCL076W) vs. 0.1:DIX28 (PTDH3)	-2.754	-3,471 to -2,037	Yes	****	<0,0001
	10-4:PYCL076W vs. 10-1:PCSS1	-0.539	-1,211 to 0,1335	No	ns	0.5081															0.0001:DIX20 (PYCL076W) vs. 0.1:DIX17 (PMFA2)	-0.8343	-1,507 to -0,1618	Yes	***	0.0006					10-4:PYCL076W vs. 10-1:PCSS1	-0.5578	-0,7184 to -0,3971	Yes	****	<0,0001					0.0001:DIX20 (PYCL076W) vs. 0.1:DIX17 (PMFA2)	-2.855	-3,473 to -2,238	Yes	****	<0,0001
	10-4:PYCL076W vs. 10-1:PIME4	-0.7533	-1,426 to -0,08076	Yes	**	0.0067															0.0001:DIX20 (PYCL076W) vs. 0.1:DIX18 (PMFA1)	-0.849	-1,521 to -0,1765	Yes	***	0.0004					10-4:PYCL076W vs. 10-1:PIME4	-0.5902	-0,7508 to -0,4296	Yes	****	<0,0001					0.0001:DIX20 (PYCL076W) vs. 0.1:DIX18 (PMFA1)	-1.469	-2,087 to -0,8519	Yes	****	<0,0001
	10-4:PYCL076W vs. 10-1:PHPF1	-1.22	-1,893 to -0,5476	Yes	****	<0,0001															0.0001:DIX20 (PYCL076W) vs. 0.1:DIX19 (PAGA2)	-1.146	-1,819 to -0,4737	Yes	****	<0,0001					10-4:PYCL076W vs. 10-1:PHPF1	-0.468	-0,6286 to -0,3074	Yes	****	<0,0001					0.0001:DIX20 (PYCL076W) vs. 0.1:DIX19 (PAGA2)	-1.497	-2,115 to -0,8799	Yes	****	<0,0001
	10-4:PYCL076W vs. 10-1:PYCL076W	-1.4	-1,850 to -0,9491	Yes	****	<0,0001															0.0001:DIX20 (PYCL076W) vs. 0.1:DIX20 (PYCL076W)	-1.4	-1,850 to -0,9491	Yes	****	<0,0001					10-4:PYCL076W vs. 10-1:PYCL076W	-0.5584	-0,6660 to -0,4508	Yes	****	<0,0001					0.0001:DIX20 (PYCL076W) vs. 0.1:DIX20 (PYCL076W)	-0.8413	-1,255 to -0,4275	Yes	****	<0,0001
	10-4:PYCL076W vs. 10-1:PMFA1	-1.965	-2,638 to -1,293	Yes	****	<0,0001															0.0001:DIX20 (PYCL076W) vs. 0.1:DIX21 (PIME4)	-0.7705	-1,443 to -0,09796	Yes	**	0.0042					10-4:PYCL076W vs. 10-1:PMFA1	-0.496	-0,6566 to -0,3354	Yes	****	<0,0001					0.0001:DIX20 (PYCL076W) vs. 0.1:DIX21 (PIME4)	-0.1631	-0,7806 to 0,4545	No	ns	>0,9999
	10-4:PYCL076W vs. 10-1:PFIG1	-1.678	-2,350 to -1,005	Yes	****	<0,0001															0.0001:DIX20 (PYCL076W) vs. 0.1:DIX22 (PHPF1)	-0.03191	-0,7044 to 0,6406	No	ns	>0,9999					10-4:PYCL076W vs. 10-1:PFIG1	-0.6013	-0,7619 to -0,4407	Yes	****	<0,0001					0.0001:DIX20 (PYCL076W) vs. 0.1:DIX22 (PHPF1)	-0.7521	-1,370 to -0,1345	Yes	**	0.001
	10-4:PYCL076W vs. 10-1:PAGA2	-2.024	-2,696 to -1,351	Yes	****	<0,0001															0.0001:DIX20 (PYCL076W) vs. 0.1:DIX23 (PCSS1)	-0.1809	-0,8534 to 0,4916	No	ns	>0,9999					10-4:PYCL076W vs. 10-1:PAGA2	-0.5263	-0,6869 to -0,3656	Yes	****	<0,0001					0.0001:DIX20 (PYCL076W) vs. 0.1:DIX23 (PCSS1)	0.01879	-0,5987 to 0,6363	No	ns	>0,9999
	10-4:PYCL076W vs. 10-1:PFUS1	-2.219	-2,892 to -1,547	Yes	****	<0,0001															0.0001:DIX20 (PYCL076W) vs. 0.1:DIX24 (PFUS1)	-1.638	-2,310 to -0,9654	Yes	****	<0,0001					10-4:PYCL076W vs. 10-1:PFUS1	-0.6113	-0,7720 to -0,4507	Yes	****	<0,0001					0.0001:DIX20 (PYCL076W) vs. 0.1:DIX24 (PFUS1)	-1.608	-2,226 to -0,9905	Yes	****	<0,0001
	10-4:PYCL076W vs. 10-1:PMFA2	-3.346	-4,018 to -2,673	Yes	****	<0,0001															0.0001:DIX20 (PYCL076W) vs. 0.1:DIX25 (PFIG1)	-1.562	-2,235 to -0,8899	Yes	****	<0,0001					10-4:PYCL076W vs. 10-1:PMFA2	-0.4905	-0,6511 to -0,3299	Yes	****	<0,0001					0.0001:DIX20 (PYCL076W) vs. 0.1:DIX25 (PFIG1)	-1.077	-1,694 to -0,4590	Yes	****	<0,0001
	10-4:PYCL076W vs. 100:PCSS1	-0.702	-1,388 to -0,01588	Yes	*	0.0349															0.0001:DIX20 (PYCL076W) vs. 1:DIX17 (PMFA2)	-0.9972	-1,683 to -0,3112	Yes	****	<0,0001					10-4:PYCL076W vs. 100:PCSS1	-0.6006	-0,7645 to -0,4367	Yes	****	<0,0001					0.0001:DIX20 (PYCL076W) vs. 1:DIX17 (PMFA2)	-2.975	-3,605 to -2,345	Yes	****	<0,0001
	10-4:PYCL076W vs. 100:PIME4	-0.9162	-1,602 to -0,2302	Yes	****	<0,0001															0.0001:DIX20 (PYCL076W) vs. 1:DIX18 (PMFA1)	-1.012	-1,698 to -0,3259	Yes	****	<0,0001					10-4:PYCL076W vs. 100:PIME4	-0.633	-0,7969 to -0,4692	Yes	****	<0,0001					0.0001:DIX20 (PYCL076W) vs. 1:DIX18 (PMFA1)	-1.59	-2,220 to -0,9595	Yes	****	<0,0001
	10-4:PYCL076W vs. 100:PHPF1	-1.383	-2,069 to -0,6970	Yes	****	<0,0001															0.0001:DIX20 (PYCL076W) vs. 1:DIX19 (PAGA2)	-1.309	-1,995 to -0,6231	Yes	****	<0,0001					10-4:PYCL076W vs. 100:PHPF1	-0.5109	-0,6747 to -0,3470	Yes	****	<0,0001					0.0001:DIX20 (PYCL076W) vs. 1:DIX19 (PAGA2)	-1.618	-2,248 to -0,9876	Yes	****	<0,0001
	10-4:PYCL076W vs. 100:PYCL076W	-1.563	-2,033 to -1,092	Yes	****	<0,0001															0.0001:DIX20 (PYCL076W) vs. 1:DIX20 (PYCL076W)	-1.563	-2,033 to -1,092	Yes	****	<0,0001					10-4:PYCL076W vs. 100:PYCL076W	-0.6013	-0,7137 to -0,4888	Yes	****	<0,0001					0.0001:DIX20 (PYCL076W) vs. 1:DIX20 (PYCL076W)	-0.9614	-1,394 to -0,5293	Yes	****	<0,0001
	10-4:PYCL076W vs. 100:PMFA1	-2.128	-2,814 to -1,442	Yes	****	<0,0001															0.0001:DIX20 (PYCL076W) vs. 1:DIX21 (PIME4)	-0.9334	-1,620 to -0,2474	Yes	****	<0,0001					10-4:PYCL076W vs. 100:PMFA1	-0.5388	-0,7027 to -0,3750	Yes	****	<0,0001					0.0001:DIX20 (PYCL076W) vs. 1:DIX21 (PIME4)	-0.2832	-0,9132 to 0,3468	No	ns	>0,9999
	10-4:PYCL076W vs. 100:PFIG1	-1.841	-2,527 to -1,155	Yes	****	<0,0001															0.0001:DIX20 (PYCL076W) vs. 1:DIX22 (PHPF1)	-0.1949	-0,8810 to 0,4912	No	ns	>0,9999					10-4:PYCL076W vs. 100:PFIG1	-0.6441	-0,8080 to -0,4803	Yes	****	<0,0001					0.0001:DIX20 (PYCL076W) vs. 1:DIX22 (PHPF1)	-0.8722	-1,502 to -0,2422	Yes	****	<0,0001
	10-4:PYCL076W vs. 100:PAGA2	-2.187	-2,873 to -1,501	Yes	****	<0,0001															0.0001:DIX20 (PYCL076W) vs. 1:DIX23 (PCSS1)	-0.3439	-1,030 to 0,3422	No	ns	>0,9999					10-4:PYCL076W vs. 100:PAGA2	-0.5691	-0,7330 to -0,4052	Yes	****	<0,0001					0.0001:DIX20 (PYCL076W) vs. 1:DIX23 (PCSS1)	-0.1013	-0,7313 to 0,5287	No	ns	>0,9999
	10-4:PYCL076W vs. 100:PFUS1	-2.382	-3,068 to -1,696	Yes	****	<0,0001															0.0001:DIX20 (PYCL076W) vs. 1:DIX24 (PFUS1)	-1.801	-2,487 to -1,115	Yes	****	<0,0001					10-4:PYCL076W vs. 100:PFUS1	-0.6542	-0,8181 to -0,4903	Yes	****	<0,0001					0.0001:DIX20 (PYCL076W) vs. 1:DIX24 (PFUS1)	-1.728	-2,358 to -1,098	Yes	****	<0,0001
	10-4:PYCL076W vs. 100:PMFA2	-3.509	-4,195 to -2,823	Yes	****	<0,0001															0.0001:DIX20 (PYCL076W) vs. 1:DIX25 (PFIG1)	-1.725	-2,411 to -1,039	Yes	****	<0,0001					10-4:PYCL076W vs. 100:PMFA2	-0.5333	-0,6972 to -0,3695	Yes	****	<0,0001					0.0001:DIX20 (PYCL076W) vs. 1:DIX25 (PFIG1)	-1.197	-1,827 to -0,5666	Yes	****	<0,0001
	10-4:PYCL076W vs. 101:PCSS1	-0.6415	-1,328 to 0,04462	No	ns	0.1257															0.0001:DIX20 (PYCL076W) vs. 10:DIX17 (PMFA2)	-0.9367	-1,623 to -0,2507	Yes	****	<0,0001					10-4:PYCL076W vs. 101:PCSS1	-0.5264	-0,6902 to -0,3625	Yes	****	<0,0001					0.0001:DIX20 (PYCL076W) vs. 10:DIX17 (PMFA2)	-2.989	-3,619 to -2,359	Yes	****	<0,0001
	10-4:PYCL076W vs. 101:PIME4	-0.8557	-1,542 to -0,1697	Yes	***	0.0006															0.0001:DIX20 (PYCL076W) vs. 10:DIX18 (PMFA1)	-0.9515	-1,638 to -0,2654	Yes	****	<0,0001					10-4:PYCL076W vs. 101:PIME4	-0.5588	-0,7227 to -0,3949	Yes	****	<0,0001					0.0001:DIX20 (PYCL076W) vs. 10:DIX18 (PMFA1)	-1.603	-2,233 to -0,9733	Yes	****	<0,0001
	10-4:PYCL076W vs. 101:PHPF1	-1.323	-2,009 to -0,6365	Yes	****	<0,0001															0.0001:DIX20 (PYCL076W) vs. 10:DIX19 (PAGA2)	-1.249	-1,935 to -0,5626	Yes	****	<0,0001					10-4:PYCL076W vs. 101:PHPF1	-0.4366	-0,6005 to -0,2727	Yes	****	<0,0001					0.0001:DIX20 (PYCL076W) vs. 10:DIX19 (PAGA2)	-1.631	-2,261 to -1,001	Yes	****	<0,0001
	10-4:PYCL076W vs. 101:PYCL076W	-1.502	-1,973 to -1,032	Yes	****	<0,0001															0.0001:DIX20 (PYCL076W) vs. 10:DIX20 (PYCL076W)	-1.502	-1,973 to -1,032	Yes	****	<0,0001					10-4:PYCL076W vs. 101:PYCL076W	-0.527	-0,6394 to -0,4146	Yes	****	<0,0001					0.0001:DIX20 (PYCL076W) vs. 10:DIX20 (PYCL076W)	-0.9752	-1,407 to -0,5430	Yes	****	<0,0001
	10-4:PYCL076W vs. 101:PMFA1	-2.068	-2,754 to -1,382	Yes	****	<0,0001															0.0001:DIX20 (PYCL076W) vs. 10:DIX21 (PIME4)	-0.8729	-1,559 to -0,1869	Yes	***	0.0003					10-4:PYCL076W vs. 101:PMFA1	-0.4646	-0,6284 to -0,3007	Yes	****	<0,0001					0.0001:DIX20 (PYCL076W) vs. 10:DIX21 (PIME4)	-0.2969	-0,9269 to 0,3331	No	ns	>0,9999
	10-4:PYCL076W vs. 101:PFIG1	-1.78	-2,466 to -1,094	Yes	****	<0,0001															0.0001:DIX20 (PYCL076W) vs. 10:DIX22 (PHPF1)	-0.1344	-0,8205 to 0,5517	No	ns	>0,9999					10-4:PYCL076W vs. 101:PFIG1	-0.5699	-0,7338 to -0,4060	Yes	****	<0,0001					0.0001:DIX20 (PYCL076W) vs. 10:DIX22 (PHPF1)	-0.8859	-1,516 to -0,2559	Yes	****	<0,0001
	10-4:PYCL076W vs. 101:PAGA2	-2.126	-2,812 to -1,440	Yes	****	<0,0001															0.0001:DIX20 (PYCL076W) vs. 10:DIX23 (PCSS1)	-0.2834	-0,9694 to 0,4027	No	ns	>0,9999					10-4:PYCL076W vs. 101:PAGA2	-0.4949	-0,6587 to -0,3310	Yes	****	<0,0001					0.0001:DIX20 (PYCL076W) vs. 10:DIX23 (PCSS1)	-0.1151	-0,7451 to 0,5149	No	ns	>0,9999
	10-4:PYCL076W vs. 101:PFUS1	-2.322	-3,008 to -1,636	Yes	****	<0,0001															0.0001:DIX20 (PYCL076W) vs. 10:DIX24 (PFUS1)	-1.74	-2,426 to -1,054	Yes	****	<0,0001					10-4:PYCL076W vs. 101:PFUS1	-0.5799	-0,7438 to -0,4161	Yes	****	<0,0001					0.0001:DIX20 (PYCL076W) vs. 10:DIX24 (PFUS1)	-1.742	-2,372 to -1,112	Yes	****	<0,0001
	10-4:PYCL076W vs. 101:PMFA2	-3.448	-4,134 to -2,762	Yes	****	<0,0001															0.0001:DIX20 (PYCL076W) vs. 10:DIX25 (PFIG1)	-1.665	-2,351 to -0,9788	Yes	****	<0,0001					10-4:PYCL076W vs. 101:PMFA2	-0.4591	-0,6229 to -0,2952	Yes	****	<0,0001					0.0001:DIX20 (PYCL076W) vs. 10:DIX25 (PFIG1)	-1.21	-1,840 to -0,5804	Yes	****	<0,0001
	10-4:PYCL076W vs. 102:Neg.Con.	0.006137	-0,7743 to 0,7866	No	ns	>0,9999															0.0001:DIX20 (PYCL076W) vs. 100:DIX14 (Neg.Con.)	-0.254	-1,034 to 0,5265	No	ns	>0,9999					10-4:PYCL076W vs. 102:Neg.Con.	-0.4604	-0,6468 to -0,2740	Yes	****	<0,0001					0.0001:DIX20 (PYCL076W) vs. 100:DIX14 (Neg.Con.)	0.4665	-0,2501 to 1,183	No	ns	0.9523
	10-4:PYCL076W vs. 102:PPGK1	-2.321	-3,102 to -1,541	Yes	****	<0,0001															0.0001:DIX20 (PYCL076W) vs. 100:DIX27 (PPGK1)	-0.2471	-1,028 to 0,5334	No	ns	>0,9999					10-4:PYCL076W vs. 102:PPGK1	-0.4315	-0,6179 to -0,2451	Yes	****	<0,0001					0.0001:DIX20 (PYCL076W) vs. 100:DIX27 (PPGK1)	-1.89	-2,606 to -1,173	Yes	****	<0,0001
	10-4:PYCL076W vs. 102:PTDH3	-3.265	-4,046 to -2,485	Yes	****	<0,0001															0.0001:DIX20 (PYCL076W) vs. 100:DIX28 (PTDH3)	-0.2719	-1,052 to 0,5085	No	ns	>0,9999					10-4:PYCL076W vs. 102:PTDH3	-0.4604	-0,6468 to -0,2740	Yes	****	<0,0001					0.0001:DIX20 (PYCL076W) vs. 100:DIX28 (PTDH3)	-2.805	-3,522 to -2,088	Yes	****	<0,0001
	10-4:PYCL076W vs. 102:PCSS1	-0.5769	-1,249 to 0,09559	No	ns	0.3085															0.0001:DIX20 (PYCL076W) vs. 100:DIX17 (PMFA2)	-0.8722	-1,545 to -0,1997	Yes	***	0.0002					10-4:PYCL076W vs. 102:PCSS1	-0.5447	-0,7053 to -0,3841	Yes	****	<0,0001					0.0001:DIX20 (PYCL076W) vs. 100:DIX17 (PMFA2)	-2.906	-3,524 to -2,289	Yes	****	<0,0001
	10-4:PYCL076W vs. 102:PIME4	-0.7912	-1,464 to -0,1187	Yes	**	0.0023															0.0001:DIX20 (PYCL076W) vs. 100:DIX18 (PMFA1)	-0.8869	-1,559 to -0,2144	Yes	***	0.0001					10-4:PYCL076W vs. 102:PIME4	-0.5771	-0,7378 to -0,4165	Yes	****	<0,0001					0.0001:DIX20 (PYCL076W) vs. 100:DIX18 (PMFA1)	-1.52	-2,138 to -0,9029	Yes	****	<0,0001
	10-4:PYCL076W vs. 102:PHPF1	-1.258	-1,930 to -0,5855	Yes	****	<0,0001															0.0001:DIX20 (PYCL076W) vs. 100:DIX19 (PAGA2)	-1.184	-1,857 to -0,5116	Yes	****	<0,0001					10-4:PYCL076W vs. 102:PHPF1	-0.455	-0,6156 to -0,2943	Yes	****	<0,0001					0.0001:DIX20 (PYCL076W) vs. 100:DIX19 (PAGA2)	-1.548	-2,166 to -0,9309	Yes	****	<0,0001
	10-4:PYCL076W vs. 102:PYCL076W	-1.438	-1,888 to -0,9870	Yes	****	<0,0001															0.0001:DIX20 (PYCL076W) vs. 100:DIX20 (PYCL076W)	-1.438	-1,888 to -0,9870	Yes	****	<0,0001					10-4:PYCL076W vs. 102:PYCL076W	-0.5453	-0,6530 to -0,4377	Yes	****	<0,0001					0.0001:DIX20 (PYCL076W) vs. 100:DIX20 (PYCL076W)	-0.8923	-1,306 to -0,4785	Yes	****	<0,0001
	10-4:PYCL076W vs. 102:PMFA1	-2.003	-2,676 to -1,331	Yes	****	<0,0001															0.0001:DIX20 (PYCL076W) vs. 100:DIX21 (PIME4)	-0.8084	-1,481 to -0,1359	Yes	**	0.0014					10-4:PYCL076W vs. 102:PMFA1	-0.4829	-0,6435 to -0,3223	Yes	****	<0,0001					0.0001:DIX20 (PYCL076W) vs. 100:DIX21 (PIME4)	-0.214	-0,8316 to 0,4035	No	ns	>0,9999
	10-4:PYCL076W vs. 102:PFIG1	-1.716	-2,388 to -1,043	Yes	****	<0,0001															0.0001:DIX20 (PYCL076W) vs. 100:DIX22 (PHPF1)	-0.06983	-0,7423 to 0,6027	No	ns	>0,9999					10-4:PYCL076W vs. 102:PFIG1	-0.5882	-0,7489 to -0,4276	Yes	****	<0,0001					0.0001:DIX20 (PYCL076W) vs. 100:DIX22 (PHPF1)	-0.803	-1,421 to -0,1855	Yes	***	0.0002
	10-4:PYCL076W vs. 102:PAGA2	-2.062	-2,734 to -1,389	Yes	****	<0,0001															0.0001:DIX20 (PYCL076W) vs. 100:DIX23 (PCSS1)	-0.2188	-0,8913 to 0,4537	No	ns	>0,9999					10-4:PYCL076W vs. 102:PAGA2	-0.5132	-0,6738 to -0,3526	Yes	****	<0,0001					0.0001:DIX20 (PYCL076W) vs. 100:DIX23 (PCSS1)	-0.0322	-0,6497 to 0,5853	No	ns	>0,9999
	10-4:PYCL076W vs. 102:PFUS1	-2.257	-2,930 to -1,585	Yes	****	<0,0001															0.0001:DIX20 (PYCL076W) vs. 100:DIX24 (PFUS1)	-1.676	-2,348 to -1,003	Yes	****	<0,0001					10-4:PYCL076W vs. 102:PFUS1	-0.5983	-0,7589 to -0,4376	Yes	****	<0,0001					0.0001:DIX20 (PYCL076W) vs. 100:DIX24 (PFUS1)	-1.659	-2,277 to -1,042	Yes	****	<0,0001
	10-4:PYCL076W vs. 102:PMFA2	-3.384	-4,056 to -2,711	Yes	****	<0,0001															0.0001:DIX20 (PYCL076W) vs. 100:DIX25 (PFIG1)	-1.6	-2,273 to -0,9278	Yes	****	<0,0001					10-4:PYCL076W vs. 102:PMFA2	-0.4774	-0,6380 to -0,3168	Yes	****	<0,0001					0.0001:DIX20 (PYCL076W) vs. 100:DIX25 (PFIG1)	-1.127	-1,745 to -0,5100	Yes	****	<0,0001
	10-4:PMFA1 vs. 10-4:PFIG1	0.2876	-0,2116 to 0,7868	No	ns	0.9962															0.0001:DIX21 (PIME4) vs. 0.0001:DIX22 (PHPF1)	0.7385	0,2394 to 1,238	Yes	****	<0,0001					10-4:PMFA1 vs. 10-4:PFIG1	-0.1053	-0,2245 to 0,01392	No	ns	0.2355					0.0001:DIX21 (PIME4) vs. 0.0001:DIX22 (PHPF1)	-0.589	-1,047 to -0,1306	Yes	***	0.0003
	10-4:PMFA1 vs. 10-4:PAGA2	-0.05835	-0,5575 to 0,4408	No	ns	>0,9999															0.0001:DIX21 (PIME4) vs. 0.0001:DIX23 (PCSS1)	0.5896	0,09036 to 1,089	Yes	**	0.0021					10-4:PMFA1 vs. 10-4:PAGA2	-0.03028	-0,1495 to 0,08895	No	ns	>0,9999					0.0001:DIX21 (PIME4) vs. 0.0001:DIX23 (PCSS1)	0.1818	-0,2765 to 0,6402	No	ns	>0,9999
	10-4:PMFA1 vs. 10-4:PFUS1	-0.254	-0,7532 to 0,2452	No	ns	0.9999															0.0001:DIX21 (PIME4) vs. 0.0001:DIX24 (PFUS1)	-0.8674	-1,367 to -0,3682	Yes	****	<0,0001					10-4:PMFA1 vs. 10-4:PFUS1	-0.1153	-0,2346 to 0,003885	No	ns	0.0807					0.0001:DIX21 (PIME4) vs. 0.0001:DIX24 (PFUS1)	-1.445	-1,903 to -0,9866	Yes	****	<0,0001
	10-4:PMFA1 vs. 10-4:PMFA2	-1.38	-1,880 to -0,8812	Yes	****	<0,0001															0.0001:DIX21 (PIME4) vs. 0.0001:DIX25 (PFIG1)	-0.7919	-1,291 to -0,2927	Yes	****	<0,0001					10-4:PMFA1 vs. 10-4:PMFA2	0.005498	-0,1137 to 0,1247	No	ns	>0,9999					0.0001:DIX21 (PIME4) vs. 0.0001:DIX25 (PFIG1)	-0.9135	-1,372 to -0,4551	Yes	****	<0,0001
	10-4:PMFA1 vs. 10-3:PCSS1	0.8411	0,1550 to 1,527	Yes	***	0.0009															0.0001:DIX21 (PIME4) vs. 0.001:DIX17 (PMFA2)	-0.6491	-1,335 to 0,03698	No	ns	0.1084					10-4:PMFA1 vs. 10-3:PCSS1	-0.1886	-0,3525 to -0,02474	Yes	**	0.0038					0.0001:DIX21 (PIME4) vs. 0.001:DIX17 (PMFA2)	-3.151	-3,781 to -2,521	Yes	****	<0,0001
	10-4:PMFA1 vs. 10-3:PIME4	0.6268	-0,05923 to 1,313	No	ns	0.1648															0.0001:DIX21 (PIME4) vs. 0.001:DIX18 (PMFA1)	-0.6638	-1,350 to 0,02228	No	ns	0.0806					10-4:PMFA1 vs. 10-3:PIME4	-0.221	-0,3849 to -0,05717	Yes	****	<0,0001					0.0001:DIX21 (PIME4) vs. 0.001:DIX18 (PMFA1)	-1.765	-2,395 to -1,135	Yes	****	<0,0001
	10-4:PMFA1 vs. 10-3:PHPF1	0.16	-0,5261 to 0,8461	No	ns	>0,9999															0.0001:DIX21 (PIME4) vs. 0.001:DIX19 (PAGA2)	-0.961	-1,647 to -0,2749	Yes	****	<0,0001					10-4:PMFA1 vs. 10-3:PHPF1	-0.09887	-0,2627 to 0,06500	No	ns	0.9889					0.0001:DIX21 (PIME4) vs. 0.001:DIX19 (PAGA2)	-1.793	-2,423 to -1,163	Yes	****	<0,0001
	10-4:PMFA1 vs. 10-3:PYCL076W	-0.01962	-0,7057 to 0,6665	No	ns	>0,9999															0.0001:DIX21 (PIME4) vs. 0.001:DIX20 (PYCL076W)	-1.215	-1,901 to -0,5285	Yes	****	<0,0001					10-4:PMFA1 vs. 10-3:PYCL076W	-0.1893	-0,3531 to -0,02539	Yes	**	0.0035					0.0001:DIX21 (PIME4) vs. 0.001:DIX20 (PYCL076W)	-1.137	-1,767 to -0,5067	Yes	****	<0,0001
	10-4:PMFA1 vs. 10-3:PMFA1	-0.5853	-1,056 to -0,1146	Yes	***	0.0006															0.0001:DIX21 (PIME4) vs. 0.001:DIX21 (PIME4)	-0.5853	-1,056 to -0,1146	Yes	***	0.0006					10-4:PMFA1 vs. 10-3:PMFA1	-0.1268	-0,2392 to -0,01441	Yes	**	0.0057					0.0001:DIX21 (PIME4) vs. 0.001:DIX21 (PIME4)	-0.4584	-0,8906 to -0,02627	Yes	*	0.0189
	10-4:PMFA1 vs. 10-3:PFIG1	-0.2977	-0,9838 to 0,3884	No	ns	>0,9999															0.0001:DIX21 (PIME4) vs. 0.001:DIX22 (PHPF1)	0.1533	-0,5328 to 0,8393	No	ns	>0,9999					10-4:PMFA1 vs. 10-3:PFIG1	-0.2321	-0,3960 to -0,06827	Yes	****	<0,0001					0.0001:DIX21 (PIME4) vs. 0.001:DIX22 (PHPF1)	-1.047	-1,677 to -0,4174	Yes	****	<0,0001
	10-4:PMFA1 vs. 10-3:PAGA2	-0.6436	-1,330 to 0,04245	No	ns	0.1206															0.0001:DIX21 (PIME4) vs. 0.001:DIX23 (PCSS1)	0.004282	-0,6818 to 0,6904	No	ns	>0,9999					10-4:PMFA1 vs. 10-3:PAGA2	-0.1571	-0,3210 to 0,006758	No	ns	0.0911					0.0001:DIX21 (PIME4) vs. 0.001:DIX23 (PCSS1)	-0.2766	-0,9066 to 0,3534	No	ns	>0,9999
	10-4:PMFA1 vs. 10-3:PFUS1	-0.8393	-1,525 to -0,1532	Yes	***	0.0009															0.0001:DIX21 (PIME4) vs. 0.001:DIX24 (PFUS1)	-1.453	-2,139 to -0,7666	Yes	****	<0,0001					10-4:PMFA1 vs. 10-3:PFUS1	-0.2422	-0,4060 to -0,07831	Yes	****	<0,0001					0.0001:DIX21 (PIME4) vs. 0.001:DIX24 (PFUS1)	-1.903	-2,533 to -1,273	Yes	****	<0,0001
	10-4:PMFA1 vs. 10-3:PMFA2	-1.966	-2,652 to -1,280	Yes	****	<0,0001															0.0001:DIX21 (PIME4) vs. 0.001:DIX25 (PFIG1)	-1.377	-2,063 to -0,6911	Yes	****	<0,0001					10-4:PMFA1 vs. 10-3:PMFA2	-0.1213	-0,2852 to 0,04254	No	ns	0.7384					0.0001:DIX21 (PIME4) vs. 0.001:DIX25 (PFIG1)	-1.372	-2,002 to -0,7419	Yes	****	<0,0001
	10-4:PMFA1 vs. 10-2:PCSS1	0.1534	-0,5327 to 0,8395	No	ns	>0,9999															0.0001:DIX21 (PIME4) vs. 0.01:DIX17 (PMFA2)	-1.337	-2,023 to -0,6508	Yes	****	<0,0001					10-4:PMFA1 vs. 10-2:PCSS1	-0.4956	-0,6595 to -0,3318	Yes	****	<0,0001					0.0001:DIX21 (PIME4) vs. 0.01:DIX17 (PMFA2)	-3.531	-4,161 to -2,901	Yes	****	<0,0001
	10-4:PMFA1 vs. 10-2:PIME4	-0.0609	-0,7470 to 0,6252	No	ns	>0,9999															0.0001:DIX21 (PIME4) vs. 0.01:DIX18 (PMFA1)	-1.352	-2,038 to -0,6655	Yes	****	<0,0001					10-4:PMFA1 vs. 10-2:PIME4	-0.5281	-0,6919 to -0,3642	Yes	****	<0,0001					0.0001:DIX21 (PIME4) vs. 0.01:DIX18 (PMFA1)	-2.145	-2,775 to -1,515	Yes	****	<0,0001
	10-4:PMFA1 vs. 10-2:PHPF1	-0.5277	-1,214 to 0,1584	No	ns	0.6328															0.0001:DIX21 (PIME4) vs. 0.01:DIX19 (PAGA2)	-1.649	-2,335 to -0,9627	Yes	****	<0,0001					10-4:PMFA1 vs. 10-2:PHPF1	-0.4059	-0,5698 to -0,2420	Yes	****	<0,0001					0.0001:DIX21 (PIME4) vs. 0.01:DIX19 (PAGA2)	-2.174	-2,804 to -1,544	Yes	****	<0,0001
	10-4:PMFA1 vs. 10-2:PYCL076W	-0.7074	-1,393 to -0,02128	Yes	*	0.0308															0.0001:DIX21 (PIME4) vs. 0.01:DIX20 (PYCL076W)	-1.902	-2,588 to -1,216	Yes	****	<0,0001					10-4:PMFA1 vs. 10-2:PYCL076W	-0.4963	-0,6602 to -0,3324	Yes	****	<0,0001					0.0001:DIX21 (PIME4) vs. 0.01:DIX20 (PYCL076W)	-1.517	-2,147 to -0,8874	Yes	****	<0,0001
	10-4:PMFA1 vs. 10-2:PMFA1	-1.273	-1,744 to -0,8024	Yes	****	<0,0001															0.0001:DIX21 (PIME4) vs. 0.01:DIX21 (PIME4)	-1.273	-1,744 to -0,8024	Yes	****	<0,0001					10-4:PMFA1 vs. 10-2:PMFA1	-0.4339	-0,5463 to -0,3214	Yes	****	<0,0001					0.0001:DIX21 (PIME4) vs. 0.01:DIX21 (PIME4)	-0.8392	-1,271 to -0,4070	Yes	****	<0,0001
	10-4:PMFA1 vs. 10-2:PFIG1	-0.9854	-1,672 to -0,2994	Yes	****	<0,0001															0.0001:DIX21 (PIME4) vs. 0.01:DIX22 (PHPF1)	-0.5345	-1,221 to 0,1516	No	ns	0.595					10-4:PMFA1 vs. 10-2:PFIG1	-0.5392	-0,7030 to -0,3753	Yes	****	<0,0001					0.0001:DIX21 (PIME4) vs. 0.01:DIX22 (PHPF1)	-1.428	-2,058 to -0,7982	Yes	****	<0,0001
	10-4:PMFA1 vs. 10-2:PAGA2	-1.331	-2,017 to -0,6453	Yes	****	<0,0001															0.0001:DIX21 (PIME4) vs. 0.01:DIX23 (PCSS1)	-0.6835	-1,370 to 0,002619	No	ns	0.053					10-4:PMFA1 vs. 10-2:PAGA2	-0.4641	-0,6280 to -0,3003	Yes	****	<0,0001					0.0001:DIX21 (PIME4) vs. 0.01:DIX23 (PCSS1)	-0.6573	-1,287 to -0,02731	Yes	*	0.0252
	10-4:PMFA1 vs. 10-2:PFUS1	-1.527	-2,213 to -0,8410	Yes	****	<0,0001															0.0001:DIX21 (PIME4) vs. 0.01:DIX24 (PFUS1)	-2.14	-2,827 to -1,454	Yes	****	<0,0001					10-4:PMFA1 vs. 10-2:PFUS1	-0.5492	-0,7131 to -0,3853	Yes	****	<0,0001					0.0001:DIX21 (PIME4) vs. 0.01:DIX24 (PFUS1)	-2.284	-2,914 to -1,654	Yes	****	<0,0001
	10-4:PMFA1 vs. 10-2:PMFA2	-2.653	-3,339 to -1,967	Yes	****	<0,0001															0.0001:DIX21 (PIME4) vs. 0.01:DIX25 (PFIG1)	-2.065	-2,751 to -1,379	Yes	****	<0,0001					10-4:PMFA1 vs. 10-2:PMFA2	-0.4284	-0,5922 to -0,2645	Yes	****	<0,0001					0.0001:DIX21 (PIME4) vs. 0.01:DIX25 (PFIG1)	-1.753	-2,383 to -1,123	Yes	****	<0,0001
	10-4:PMFA1 vs. 10-1:Neg.Con.	0.6097	-0,1708 to 1,390	No	ns	0.5865															0.0001:DIX21 (PIME4) vs. 0.1:DIX14 (Neg.Con.)	-0.8453	-1,626 to -0,06484	Yes	*	0.0129					10-4:PMFA1 vs. 10-1:Neg.Con.	-0.5359	-0,7223 to -0,3495	Yes	****	<0,0001					0.0001:DIX21 (PIME4) vs. 0.1:DIX14 (Neg.Con.)	-0.1607	-0,8774 to 0,5560	No	ns	>0,9999
[truncated: 12,129 more rows]
[truncated: 3 more columns]

## Sheet: Suppl. Table 3 - PRP analysis
Two-way ANOVA - ΔyEGFP = yEGFPx µM - yEGFP0 µM for PPGK1 and PTDH3										Two-way ANOVA - Fold changes of yEGFP and SSC-A for PPGK1 and PTDH3										Linear regression								Nonlinear curve fit: [Agonist] vs. response -- Variable slope (four parameters)
[truncated: 163 more rows]

[truncated: 10 more sheets: Suppl. Table 4 - Regression, Suppl. Table 5 - CD19 ANOVA, Suppl. Table 6 - GPCR Library, Suppl. Table 7 - Cult. cond., Suppl. Table 8 - Jurkat NFAT, Suppl. Table 9 - Donor CAR T, Suppl. Table 10 - Primers, Suppl. Table 11 - Parts, Suppl. Table 12 - Plasmids, Suppl. Table 13 - Strains]
